# Supplementary material
Source: PubMed Central journal article supplement (PMC5572561)
Supplement: NIHMS868585-supplement-SupplementaryMaterial.pdf [file NIHMS868585-supplement-SupplementaryMaterial.pdf]

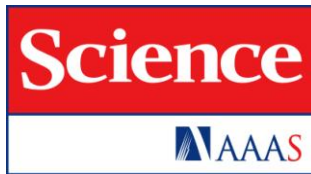

## Supplementary Materials for

### **Blocking promiscuous activation at cryptic promoters directs cell type specific gene expression**

Jongmin Kim, Chenggang Lu, Shrividhya Srinivasan, Stephan Awe, Alexander Brehm  
and Margaret T. Fuller\*

\* Correspondence to: [mtfuller@stanford.edu](mailto:mtfuller@stanford.edu)

#### **This PDF file includes:**

Materials and Methods  
Supplementary Text  
Figs. S1 to S15  
Table S4

#### **Other Supplementary Materials for this manuscript includes the following:**

Tables S1-3 and S5-8 (Excel format)

## Materials and Methods

### Fly strains and husbandry

*Drosophila* strains were raised in standard molasses medium at 25°C unless otherwise noted. The following *Drosophila* strains were used: *w*<sup>1118</sup> as wild-type; *bam*<sup>1</sup>(8); *bam*<sup>Δ86</sup>(28); *hs-Bam* (29); *hs-Bam-HA* (30); *rbp4P-Rbp4-YFP* (9); *bamP-Bam-HA* (30); *bamP-Bam-GFP* (31); *saP-Sa-GFP* (32); *bam-Gal4* (31); *UAS-dicer2* (33); *Df(2L)ED779/SM6a* (deficiency for *kmg*) (34); *UAS-RNAi-CG5204 (kmg)* (Vienna *Drosophila* Resource Center (VDRC), hairpin #1: transformant ID 107395 / hairpin #2: transformant ID 34235); *UAS-RNAi-dMi-2* (VDRC, transformant ID 107204); *y<sup>1</sup> P(act5c-cas9, w+) M(3xP3-RFP.attP)ZH-2A w\** (35); *aly*<sup>5p</sup>, *aly*<sup>2</sup> (5); *y<sup>1</sup>, w<sup>1</sup>, hs-Flp<sup>122</sup>; FRT40A, ubi-nGFP/CyO* (Bloomington *Drosophila* Stock Center (BDSC)); *dMi-2-GFP* (Flytrap, CA06598) (36).

### Clonal and RNAi analysis

RNAi knock-down (KD) experiments were carried out by crossing males with a *UAS-RNAi hairpin* transgene (VDRC) to virgin females of *w;;bam-Gal4, UAS-dicer2*. Progeny were raised for three days at 25°C then transferred to and held at 30°C to increase expression of the RNAi hairpin.

To produce clonal germ line cysts homozygous mutant for *kmg*, females *yw, hs-Flp; FRT40A, ubi-nGFP/CyO* flies were crossed with *w; FRT40A, kmg<sup>Δ7</sup>/CyO* males, and non-Cy progeny were chosen for the experiment. Heat shock was applied once at 37°C for 90 minutes ~4-5 days prior to eclosion to induce formation of clones.

### Generation of the transgenic lines for Kmg and Aly-HA

A 4,301 bp region (dm6, chr2L:13159806-13164106) containing the open reading frame of *kmg* plus genomic regions 1kb upstream and 1kb downstream was amplified by PCR from genomic DNA. After cutting the vector pBDP2 (37) with EcoRI, the purified PCR fragment was inserted into the vector by Gibson assembly. The sequence of the pBDP2-*kmg* assembled plasmid was verified by sequencing before transformation. 500ng/μL of pBDP2-Kmg plasmid was injected into PhiC31 expressing embryos with an attP target site on the third chromosome (BL25710, attP@68A4). PCR primers used to amplify the genomic region containing *kmg* were:  
fw: GGCGTATCACGAGGCCCTTTCGTCTTCAAGtcccagttggaattatctctgaatagc  
re: ACCCGTGGCCAGCGGCCGCTCTAGAACTAGgggacctggttgaggagc  
(Sequence in upper case denotes the part complementary to the regions in pBDP2 vector, and the sequence in lower case denotes regions complementary to the genomic regions of *kmg*)

To build the transgene for expression of epitope tagged Aly under the control of its endogenous promoter, 3xHA sequences (ggccgcacatctttaccatacagatgttcctgactatgcgggctatccctatgacgtcccggactatgcaggatcctatccatagacgttcagattacgctgctcagagcggtatgcaggtg) were PCR amplified and inserted in frame immediately after the start codon for Aly to build N-terminal tagged 3HA-Aly or immediately before the stop codon to build the C-terminal tagged Aly-3HA construct. Both N-terminal and C-terminal tagged Aly genomic rescue fragments containing the complete Aly coding sequences plus 1908 bp of upstream regulatory sequences and 1081 bp of downstream regulatory sequences (dm6, chr3L:3023505-3028324) were inserted into pCasper4 for P-element mediated germline transformation. Both constructs were verified by sequencing before being injected into  $y^1w^{1118}$  embryos. Both N-terminal tagged and C-terminal tagged lines rescued the  $aly^{-/-}$  phenotype, and C-terminal tagged lines were used exclusively for this study (fig. S10A and B). Immunostaining of Aly-HA recapitulated the expression pattern of Aly (5), being both nuclear and cytoplasmic in immature spermatocytes, then becoming predominantly nuclear in mature spermatocytes (fig. S10C and C'). Aly-HA protein was expressed and correctly localized in the nucleus of *kmg* KD spermatocytes (fig. S10D and D'). For ChIP of Aly-HA, testes were dissected from flies bearing one copy of the Aly-HA genomic rescue transgene in addition to the two wild-type endogenous *aly* alleles.

### Antibody against Kmg

Four regions of the Kmg coding sequence, amino acids (aa)27-107, aa224-312, aa402-435, and aa652-747, were initially cloned into GST (Glutathione S-transferases)- and MBP (Maltose Binding Protein)- fusion bacterial expression vectors. Two regions, aa27-107 (N-term) and aa652-747 (C-term), were chosen to be antigens because they were soluble and expressed at higher levels than the other fragments in the *BL21* strain of *E.coli*. Pre-immune sera from eight rabbits were screened and four rabbits were chosen based on their lower background in western blot and immunostaining of *Drosophila* testes. 300µg/500µL of purified MBP-Kmg-N-term and 500µg/500µL of purified MBP-Kmg-C-term were injected into two rabbits each (Josman, LLC., Napa, CA). After the initial immunization, boost injections were performed with the same dosage of antigen at days 21, 35, 49, and 63. After preliminary testing of immunoreactivity of rabbit sera at day 77, a final boost was performed at day 91 and the animals were exsanguinated to obtain serum at day 101. Antibody against the C-terminal part of Kmg was affinity purified using GST-Kmg-652-747.

### Immunofluorescence staining

For wholmount staining, testes from 0-1 day old males were dissected in 1X phosphate-buffered saline (PBS) and incubated with 4% formaldehyde for 20 minutes at room temperature. After fixation, the testes were washed once in PBST (PBS with 0.1% Triton X-100) and permeabilized with permeabilization solution (PBS with 0.3% Triton X-100 and 0.6% sodium deoxycholate) for 1 hour. After permeabilization, testes were

washed once in PBST and blocked for 30 minutes with PBST with 3% bovine serum albumin (BSA), then incubated overnight with desired primary antibodies in PBST with 3% BSA at 4°C while rocking. After overnight primary antibody incubation, testes were washed three times with PBST, incubated with secondary antibodies conjugated with Alexa fluorophores (Alexa Fluor-488, -568, -647 from Molecular Probes) for 2 hours at room temperature in the dark while rocking, then testes were washed three times in PBST and mounted on glass slides with mounting medium with DAPI (VECTASHIELD, Vector Labs, Cat# H-1200).

For immunofluorescence staining of squashed testes, 0-1 day old males were dissected in 1X PBS and ~5 pairs of testes were placed on a glass slide (Superfrost Plus, Fisher, Cat# 12-550-15). A coverslip was applied and the testes were gently squashed by wicking PBS from under the coverslip using kimwipes while the flatness was being monitored by phase-contrast microscopy. When the testes were squashed approximately to one-cell thickness, the slide was snap frozen in liquid nitrogen, then the coverslip was removed and the testes samples were fixed in 100% methanol at -20°C for 5 minutes, then 100% acetone at -20°C for 2 minutes. After fixation, excess acetone was washed away with PBST and the samples were blocked by incubating in PBST with 3% BSA. The remaining steps were identical to those in the wholemount staining, except that the staining was done while testes samples were on the glass slide.

The sources and dilutions of primary antibodies used were as follows: Bag of Marbles (Bam, mouse, 1:5; Developmental Studies Hybridoma Bank (DSHB)) (28); Green Fluorescent Protein (GFP, rabbit, 1:3000, Invitrogen, Cat# A11122); Vasa (goat, 1:50; Santa Cruz Biotechnology, Cat# dc-13); phospho Histone 3 (rabbit, 1:100, Millipore, Cat# 04-746), dMi-2 (rabbit, 1:600, produced in Alexander Brehm lab), Prospero (mouse, 1:200, DSHB), Kmg (C-term: affinity purified, 1:200 / N-term: 1:5000 after pre-absorption to fixed embryos), HA (mouse, 1:2000, clone 16B12, Covance MMS-101P-200).

### Incorporation of EdU

Testes from 0-1 day old males were dissected into Schneider's media. After ~20 pairs of testes were dissected, the medium was exchanged with Schneider's media containing 100µM 5-ethynyl-2'-deoxyuridine (EdU) and the testes were incubated for 5 minutes in a small droplet on the slide to facilitate oxygen supply. Testes were then washed with Schneider's media twice, and immediately fixed with 4% formaldehyde for 20 minutes at room temperature, then washed and permeabilized as in the wholemount staining protocol described above. After testes were washed one time with PBST, Alexa-555 fluorophore was conjugated to EdU according to the manufacturer's protocol (Click-iT® EdU Alexa Fluor® 555 Imaging Kit, Life Technologies, Cat# C10338).

### Fluorescence microscopy and image analysis



Images were taken with either a Photometrics CoolSNAP CCD camera connected to a Zeiss Axioskop microscope or with a Leica SP2 or SP8 confocal microscope. All confocal images were obtained using microscopes maintained in the Cell Sciences Imaging Facility at the Beckman Center at Stanford University. Laser intensity and detector gain for the confocal microscope or exposure time for the fluorescent microscope were adjusted for each experiment to ensure that the signal was in linear range and not saturated. Once image acquisition settings were determined, the same settings were maintained for the entire set of images that needed to be compared.

Most images were processed using ImageJ (ver. 1.14) or Fiji (ver. 1.49m) except that stitching of phase-contrast images from adjacent fields was done using Adobe Photoshop CS6. All the samples to be compared went through the same processing in ImageJ/Fiji. For quantification of fluorescence signal intensity, the regions where fluorescent signal was detected were outlined by the 'polygon selection' tool in ImageJ and the mean pixel intensity was measured. Background signal intensity was measured by selecting the region in the same testes where there was no expression of target proteins, for example, the cytoplasmic space between nuclei for dMi-2. The mean background was then subtracted from the mean intensity of target signal. The degree of co-localization between dMi-2 and DAPI signal was evaluated using the Fiji plugin 'coloc 2' with default parameters to obtain Pearson's correlation value 'r' of spatial signal intensities between dMi-2 and DAPI.

### qRT-PCR

RNA was extracted from ~30 pairs of testes by phenol-chloroform separation using Trizol (Life Technologies, Cat# 15596-026). 0.5µg of total RNA was used to make cDNA by using Ready-To-Go You Prime First-Strand Beads (GE Healthcare, Cat# 27-9264-01) with 0.1µg of random hexamer per reaction. After reverse transcription, cDNA was diluted 1/100 in filtered water and 5-10 µL of diluted cDNA was used per qPCR reaction. qRT-PCR was done by mixing 2X SensiFAST SYBR Hi-ROX reagents (Bioline, Cat # BIO-92020) with cDNA and 125nM each primer. The 7300 Real Time PCR System from Applied Biosystems was used. Relative abundance of the transcripts was calculated by the  $\Delta\Delta C_t$  method. Two transcripts, *gapdh2* and *rpl32*, were used as normalizing controls for input cDNA amount, and both controls gave consistent results. For all the graphs represented, the data were normalized with *rpl32*. In all qRT-PCR experiments, error bars represent standard deviation from the mean in three independent biological replicates.

Primer sequences used for this study were as follows:

*gapdh2\_fw*: CCGTTCATGCCACCACCGCT  
*gapdh2\_re*: GCCACGTCCATCACGCCACA  
*rpl32\_fw*: AAGCGGCGACGCACTCTGTT  
*rpl32\_re*: GCCTGTTCGGCCTTCTGGGTG  
*rbp4\_fw*: CCGGACGTCAGCGGGCATT  
*rbp4\_re*: GCCAGCATAACAGGCCCAAG

*kmg\_fw*: CACCCAACACTGCAGGCTTCTA  
*kmg\_re*: TTCGGGTTCCCTCTGGCAAAA  
*topi\_fw*: GCCAACACGGACCTGCTCCA  
*topi\_re*: AGTCACAGGGCAGCAGGAGCT  
*osiris\_fw*: GATGGCGAGAATCTCAAGGA  
*osiris\_re*: TGAGGAAGGGGAGAATGAAG  
*obp73a\_fw*: ACTCTGGTGCCTCTGGAAGA  
*obp73a\_re*: CGTTGTTTTTGGCATAGACG  
*CG32105\_fw*: TGGCAATGGCAATGGAAACG  
*CG32105\_re*: TCGCACAGCTCGAAGTTCTT  
*btv\_fw*: CTGAACTCGGTGTTGGACGA  
*btv\_re*: TGACGCATGCCTCACATCAT  
*CG6495\_fw*: AGCAAACGCATGGATCTGGA  
*CG6495\_re*: AATGCCCTGGAGGTACTTGC  
*Oa2\_fw*: ATGCTGGTGATTGTGTCGGT  
*Oa2\_re*: ACGTCGAAGCTGTTCCACAT  
*gol\_fw*: TCGAACCTGTCCCATGTGTA  
*gol\_re*: GCCTCAACCAGTGCCAGT  
*Gyc89Db\_fw*: CCGATGCTGGAGAACTTCAT  
*Gyc89Db\_re*: AAGTCCTGCCTATCGTCGAA  
*Gr21a\_fw*: CGATCGTCTTTCCGAATCTC  
*Gr21a\_re*: GGCTCAGATCCACCCATAGA

### Microarrays

RNA was extracted from ~30 pairs of testes by phenol-chloroform separation using Trizol (Invitrogen). ~200ng of total RNA was reverse transcribed using T7-oligo(dT)24 primer, used for second-strand synthesis and finally *in vitro* transcribed to make complementary RNA (cRNA) based on the Affymetrix protocol. Fragmented cRNA was hybridized to *Drosophila* genome 2.0 arrays (Affymetrix, Cat # 900532). Microarray experiments were done by the Stanford Protein and Nucleic acid (PAN) Facility. Raw data was background adjusted and normalized using the R program (v3.0.2) with Bioconductor package GCRMA (38). All data needed to be compared were normalized together. 126 probesets that are usually contaminants from accessory glands were discarded. Statistical tests were performed and graphs were plotted with Matlab software (Mathworks R2011b). Since the sample size was small (two biological replicates per condition), we used *p*-values from t-test (two-tail, unpaired, equal variance) without false discovery rate correction to determine significantly changed transcripts. The following criteria were used to select differentially expressed transcripts: Fig. 1C,  $p < 0.05$  and (24hr PHS / no heat shock) > 2-fold; Fig. 2C,  $p < 0.01$ , (*kmg* KD / *kmg* sibling ctrl.) > 4-fold, and raw expression level in sibling ctrl. < 10; Fig. 2D,  $p < 0.01$  and (wild-type / *tMAC* (*aly*<sup>-/-</sup>)) > 2<sup>8</sup>-fold.

The basal level of expression of *prospero* (*pros*) in *kmg* sibling controls raised in 30°C was higher than that in wild-type flies raised in 25°C (fig. S12B-F). Due to this

increased basal expression at higher temperature, *pros* was not included in the 440 misexpressed gene set. However, even at 30°C, expression of *pros* mRNA and Pros protein was substantially upregulated when Kmg function was knocked down in spermatocytes and this misexpression was fully suppressed by loss of function of the tMAC subunits *aly* in the *kmg* KD (*kmg* KD, *aly*<sup>-/-</sup> (*tMAC*)) (fig. S12B-F).

Significantly enriched gene ontology (GO) terms were obtained using Database for Annotation, Visualization and Integrated Discovery (DAVID) (39). Microarray data from *bam*<sup>-/-</sup>, *aly*<sup>-/-</sup> (*tMAC*), *sa*<sup>-/-</sup> (*tTAF*) and wild-type were obtained from Chen et al. (GSE 28728) (26).

### Analysis of ChIP- and RNA-Seq data

#### Trimming:

All raw sequencing data were quality and adapter trimmed using a wrapper script TrimGalore that combines Cutadapt (ver. 1.8.1) and FastQC (ver. 0.11.4) with adapter overlap stringency of 1 and Phred quality score cutoff of 20.

#### Mapping:

For ChIP-Seq, trimmed fastq files were mapped to the *Drosophila melanogaster* genome (release 6.07 downloaded from Flybase) (40) using the Burrows-Wheeler Aligner (bwa aln, ver. 0.7.10) (41) with default parameters assuming sequencing error rate lower than 2%. For RNA-seq, trimmed fastq files were mapped using a splice-aware aligner, Tophat (ver. 2.0.9) (42), utilizing Bowtie2 (ver. 2.1.0) (43) to the *Drosophila melanogaster* genome (release 6.07) while supplying transcript annotation obtained from the Ensembl database (*Drosophila\_melanogaster*.BDGP6.82.chr.gff3) (44). Default parameters were used, except that the library type was specified as ‘fr-firststrand’ since only the first strand was retained by the dUTP method in library preparation. RNA-Seq data from 14-16 hour old embryos were obtained from the modENCODE data set web page (<http://data.modencode.org>; accession number modEncode\_4442; dataset 35400, 35401) and processed identically as our own datasets.

#### Post-mapping:

The BAM (binary version of SAM (Sequence Alignment/Map)) files generated by mapping were further filtered to exclude unmapped reads (-F 0x04), and reads mapped with low confidence (-q 1) using SAMtools (ver. 1.2) (45). Filtered BAM files were sorted and indexed by using SAMtools.

#### Peak calling:

Genomic regions enriched after chromatin immunoprecipitation with respective proteins (peaks) were identified using MACS2 (ver. 2.1.0) (46) without building a shifting model (--nomodel) since it is possible that Kmg, dMi-2 and Aly bind to broad regions of DNA.

#### Read counts calculation and visualization:

To obtain read counts corresponding to genomic positions, bedgraph files were generated from BAM files using the BEDTools genomecov (47) while normalizing all the samples to have the equivalent of 1 million mapped reads using the '-scale' option. For RNA-seq, the '-split' option was added to prevent read counts from being calculated in introns. Read counts were further normalized to have the same amount excluding the reads on rRNA regions.

Given that the sequencing library was made with the dUTP method, Bam files were divided and re-merged to obtain strand specific read counts. To obtain sequencing reads mapped to the Watson (ascending order of genomic coordinate) strand, new bam files were created by obtaining reads that were 1) first mate in pair (-f 0x40) & reverse complemented (-f 0x10), 2) second mate in pair (-f 0x80) & not reverse complemented (-F 0x10) and merging 1) and 2). In contrast, to obtain sequencing reads mapped to the Crick (descending order of genomic coordinates), 1) first mate in pair (-f 0x40) & non reverse complemented (-F 0x10), 2) second mate in pair (-f 0x80) & reverse complemented (-f 0x10) were obtained and merged. For visualization in genome browsers (i.e. Integrative Genomic Viewer), bedgraph files were converted into bigwig files using the bedGraphToBigWig program. Read counts surrounding a list of genomic loci, for example, counts on 2kb upstream and downstream of TSSs of 680 Kmg bound genes, were obtained using custom Python (ver. 2.7.3) codes (available upon request). Corresponding heatmaps and metagene plots were drawn by Matlab (R2016a).

### Western blots

Total lysates from ~10 pairs of testes were loaded on a 10% or 4-20% SDS-PAGE gel (BioRad, Mini-PROTEAN® TGX™ Gel, Cat # 456-1036 or 1096) and transferred to a PVDF membrane (Bio-RAD, Cat# 162-0177) overnight at 4°C. The blot was blocked in 5% skim milk in PBSt (0.1% tween-20) for 2 hours at room temperature, incubated with primary antibodies in 2% skim milk in PBSt at 4°C overnight while rocking. After washing three times in PBSt for 10 minutes each, the blot was incubated with HRP-conjugated secondary antibodies in 2% skim milk in PBSt for 2 hours at room temperature. After incubation with secondary antibodies, the blot was washed three times in PBSt for 10 minutes each. The signal was detected using Western Lightning Plus-ECL reagents (PerkinElmer, Cat # NEL104001EA). The source and dilutions of primary antibodies used in this study were as follows: Kmg (rabbit, affinity purified C-term, 1:2000); Topi (rat, 1:20,000, gift from H. White-Cooper), Actin (mouse, 1:200,000, Millipore, clone C4, Cat # MAB1501), dMi-2 (rabbit, 1:20,000, produced in Alexander Brehm lab.), Lsd1 (rabbit, 1:20,000, gift from L. Di Stefano), HA (mouse, 1:20,000, clone 16B12, Covance MMS-101P-200).

### Immunoprecipitation

~150 pairs of testes were dissected from wild-type, *kmg* KD or *dMi-2-GFP* flies. Testis extracts were prepared by mechanically disrupting testes in lysis buffer (20 mM

Tris-HCl pH 8.0, 135 mM NaCl, 10% glycerol, 1% Nonidet P-40, 5 mM EDTA, 1 mM PMSF and 1x Complete protease inhibitor (Roche, Cat# 11697498001)) by passing through needles with successively smaller inner diameters 15 times each (21G – 23G – 25G). Extracts were incubated in lysis buffer for 30 min at 4°C and then spun at 14,000 rpm for 10 min. The supernatant was obtained and protein concentration was measured by Bradford assay. The same amounts of total lysates for each condition (~1mg) were precleared for 45 min at 4°C by adding the lysates to uncoupled Protein A Dynabeads (for Kmg IP, Life Technologies, Cat# 10002D) or Pan Mouse IgG Dynabeads (for GFP IP, Life Technologies, Cat# 11041). Pre-cleared testis extracts were then added to Protein A or Pan Mouse IgG Dynabeads chemically crosslinked to affinity purified rabbit  $\alpha$ -Kmg or mouse  $\alpha$ -GFP (Roche, Cat# 11814460001) with dimethyl pimelimidate (DMP, Sigma) (5.4 mg DMP/mL of 0.2M triethanolamine) per manufacturer's instructions, and incubated overnight at 4°C. Beads were then washed 3 times in lysis buffer and incubated at 70°C for 30 min in elution buffer (1% SDS, 10mM EDTA, 50mM Tris pH 8.0, 1mM PMSF, 1x Complete protease inhibitor) with frequent mixing. Eluted samples were TCA precipitated and re-dissolved in 1X SDS loading buffer.

### Chromatin immunoprecipitation (ChIP) and sequencing

Testes were dissected in batches of 85 pairs at a time in PBS. Dissected testes were fixed in 1% formaldehyde in PBS at room temperature for 8 minutes in rotating test tubes. The reaction was stopped by adding 2.5M glycine to the testes in 1% formaldehyde to a final concentration of 125mM glycine and incubating at 4°C for 5 minutes. Then the fixed testes were washed in PBS three times and snap frozen in liquid nitrogen, and stored in -80°C. Eight such batches (680 pairs altogether) were used per condition.

After accumulating enough samples, each batch of 85 pairs of frozen, fixed testes were thawed, homogenized using a plastic pestle, and resuspended in 130uL of sonication buffer (10mM Tris pH 8.0, 1mM EDTA, 0.1% SDS). The testis lysates were transferred to Covaris sonication miniTubes (Covaris, microTUBE AFA Fiber Pre-Slit Snap-Cap 6x16mm), and sonicated for 10 minutes each in the Covaris E220 Focused-ultrasonicator (Treatment Time: 600 sec; Acoustic Duty Factor: 2 %; Peak Incident Power: 105 W; Cycles Per Burst: 200) to a final DNA size distribution maximum between 300-500bp. After sonication, lysates from all 680 pairs of testes for the same genotype were pooled together and centrifuged at 4°C for 5 minutes to clear debris. About 40  $\mu$ L (~4%) of supernatant was saved to check fragment size and also to use as an input sample. 1/3 volume of 3X IP buffer was then added to sonicated testis lysates to achieve a final buffer composition of (20mM Tris pH 8.0, 135mM NaCl, 10% glycerol, 1% NonidetP-40, 5mM EDTA, 0.03% SDS, 1mM PMSF, 1x Complete protease inhibitor (Roche, Cat# 11697498001)). Testis lysates in IP buffer were incubated with Protein A magnetic beads conjugated with antibodies against Kmg, HA (for Aly-HA; Abcam Cat#: ab9110) or dMi-2, prepared as described above for protein immunoprecipitation. After overnight incubation, magnetic beads were washed two times with IP buffer (without SDS), two times with high salt wash buffer (same as the IP buffer but with 270mM NaCl), two times with NaDOC buffer (10mM Tris, pH 8.0, 250mM LiCl, 0.5% Nonidet P-40, 1mM EDTA,

0.5% NaDOC), and finally one time with TE NaCl (10mM Tris pH 8.0, 1mM EDTA, 50mM NaCl), then eluted with 200µl elution buffer (50mM Tris pH 8.0, 10mM EDTA, 1% SDS, 1mM PMSF, 1x Complete protease inhibitor (Roche, Cat# 11697498001)) twice by incubating at 70°C with occasional mixing every five minutes for 30 minutes. Immunoprecipitated protein-chromatin complexes were treated with RNase A for 30 minutes at 37°C, then with proteinase K for three hours at 55 °C, then de-crosslinked by incubating at 65°C for >12 hours. DNA was extracted from de-crosslinked eluates by phenol:chloroform:isoamyl alcohol (25:24:1) based phase separation followed by ethanol/sodium acetate precipitation. Precipitated DNA was resuspended in 15 µl of 10mM Tris, pH 8.0. The concentration of purified DNA was measured by Qubit (dsDNA HS Assay kit, Thermo Fisher Scientific, Cat#: Q32851).

Because the amount of immunoprecipitated DNA was very low (~1ng), sequencing libraries were generated without a purification step until the final PCR amplification by using a kit utilizing stem-loop adapters (Rubicon genomics, ThruPLEX DNA-Seq 12S kit) based on the manufacturer's instructions. All ChIP-Seq libraries were sequenced by NextSeq High Output mode with 75bp single end, except one replicate of the Kmg ChIP-Seq, which was sequenced with NextSeq Mid Output mode with 75bp paired end. Between 4 to 8 libraries were pooled into one sequencing lane, on average yielding over 40 million reads per sample (17 ~ 81 million). All sequencing was performed by the Stanford Functional Genomics Facility (SFGF).

### RNA-sequencing

RNA was extracted from ~150 pairs of testes per condition by phenol-chloroform separation using Trizol (Invitrogen). Purified RNA was further cleaned to remove potential residual salts using an RNeasy column (Qiagen, Cat#: 74104). mRNA was purified from ~30µg of total RNA using a Poly(A)Purist™ MAG Kit (Thermo Fisher, Cat#: AM1922) as per the manufacturer's protocol. 100ng of purified PolyA+ mRNA was used to make a strand-specific sequencing library by the dUTP incorporation method using a KAPA Stranded RNA-Seq Library Preparation Kit Illumina® Platforms (KAPA Biosystems, Cat#: KK8400) following the manufacturer's instructions. All RNA-Seq libraries were sequenced by NextSeq Mid Output mode 150bp paired end. Between 3 to 4 samples were pooled in a single lane, yielding on average of 48 million reads per sample (34 to 65 million). All sequencing was performed by the Stanford Functional Genomics Facility (SFGF).

## Supplementary Text

### Synchronized differentiation

Although both female and male germ line stem cells have been induced to differentiate by ectopic expression of Bam (48-49), it had not been explored whether this type of assay can be utilized to make germ cells undergo post-mitotic terminal differentiation in a synchronous manner. Synchronized differentiation of *bam*<sup>-/-</sup> spermatogonia to spermatocytes in two different genetic backgrounds was set up via the crossing schemes below:

\* fig. S2I-L

v♀ *w*; *hs-Bam-HA/CyO*; *bam*<sup>Δ86</sup>, *e/TM3, e, Sb* (×) ♂ *w*; ;*bam*<sup>1</sup>, *rbp4P-Rbp4-YFP*, *e/TM6b, e, Hu*

F1 used: ♂ *w*; *hs-Bam-HA*; *bam*<sup>Δ86</sup>, *e/bam*<sup>1</sup>, *rbp4P-Rbp4-YFP*

\* All other experiments

v♀ *hs-Bam/X*; ;*bam*<sup>1</sup>, *e/TM6b, e, Hu* (×) ♂ *w*; ;*bam*<sup>Δ86</sup>, *e/TM6b, e, Hu*

F1 used: ♂ *hs-Bam*; ;*bam*<sup>1</sup>, *e/bam*<sup>Δ86</sup>, *e*

The very first eclosed adult progeny were collected and used for ‘no heat shock (no Bam expression)’ control. Cleared bottles were then heat shocked at 37°C for 30 minutes in a water bath and returned to 25°C. The duration of heat shock was optimized to generate near-endogenous levels of Bam expression for a short time, so as to produce robust differentiation into spermatocytes while maintaining the population of stem cells. After heat shock induced expression of Bam, flies were collected and testis samples were prepared at a defined number of hours or days after the heat shock.

The *hs-Bam/X* line and *hs-Bam-HA/II* lines were indistinguishable in timing of upregulation of selected differentiation transcripts, including *rbp4*, *kmg* and *sa*.

Without heat shock, *hs-bam*; *bam*<sup>-/-</sup> testes contained many cysts of proliferating spermatogonia which undergo extra rounds of divisions, and eventually die (fig. S1D and E). However, by two days after the pulse of Bam expression induced by heat shock, 100% of testes examined contained differentiating spermatocytes, and on average 87.5% of germ cells (excluding dying cellular debris) seen under phase-contrast microscope were differentiating spermatocytes, which have visibly larger nuclear size than spermatogonia (fig. S1F-G, and N-O). By five days after the pulse of Bam expression, many *bam*<sup>-/-</sup> germ cells had started to undergo meiotic divisions (fig. S1H and I), and by eight days, the *bam*<sup>-/-</sup> testes had elongating spermatids (fig. S1J and K). Eventually the treated males produced motile (fig. S1L), functional sperm, and offspring if mated (fig. S1M).

Germ cells subjected to this *in vivo* synchronous differentiation protocol switched from proliferation to differentiation around 24 hours after the pulse expression of Bam. Bam protein reached its expression peak between 2 to 8 hours after the heat shock pulse

(Fig. 1B and fig. S2A-D), and a final round of TA mitosis and pre-meiotic S phase were completed within 24 hours after the heat shock, based on analysis of the mitotic marker phospho-Histone 3 (pH3) (Fig. 1B and fig. S2E-H) and incorporation of a thymidine analogue, 5-Ethynyl-2'-deoxyuridine (EdU) (Fig. 1B and fig. S2I-L). Expression of an early marker for spermatocyte differentiation, the RNA binding protein 4 (Rbp4) protein, was first detected by 32 hours after the Bam pulse, with an Rbp4-YFP protein expressed from a transgene (Fig. 1B and fig. S2I-L) (9).

At later time points, such as day 5 post heat shock (PHS) (fig. S1H) or day 8 PHS (fig. S1J), cells at the apical tip of the *hs-bam; bam<sup>-/-</sup>* testis had reverted to the *bam<sup>-/-</sup>* phenotype, as stem cells at the apical tip continued to produce *bam<sup>-/-</sup>* daughter cells after the Bam pulse was induced and the flies were returned to 25°C. As a result, *bam<sup>-/-</sup>* proliferating spermatogonia gradually accumulated within the testis. The proportion of the newborn *bam<sup>-/-</sup>* spermatogonia to differentiating spermatocytes was less than 10% in early time points up to 2 days PHS.

#### Generation of the CRISPR allele of *kmg* and expression of truncated Kmg in the mutant

A target location for the CRISPR guide RNA close to but downstream of the start codon of *kmg*, with a 12bp seed sequence unique in the genome next to the protospacer-adjacent motif (PAM) site was selected using the UCSC genome browser track for *Drosophila melanogaster* available from the Zhang lab (<http://www.genome-engineering.org/crispr>). Based on the method from Bassett et al. (50), the universal primer below containing the synthetic guide RNA (sgRNA) sequence for incorporation into the Cas9 enzyme

(AAAAGCACCGACTCGGTGCCACTTTTTCAAGTTGATAACGGACTAGCCTTATTTAACTTGCTATTCTAGCTCTAAAAC) was mixed with a specific primer containing complementary sequences to the universal primer, as well as a [T7 promoter] and the <*kmg* target sequence>

(GAAAT[TAATACGACTCACTATA]<GGAGCGTTCGGGTGATCGCT>GTTTTAGAGCTAGAAATAGC), and the mixture was PCR amplified. PCR amplified template for sgRNA was *in vitro* transcribed with T7 polymerase (MEGAscript™ T7 Kit, Life Technologies, Cat# AM1354M) overnight at 37°C. After *in vitro* transcription, the reaction mixture was treated with Turbo DNase (Life Technologies, Cat# AM2238) for 15 minutes at 37°C. sgRNA was purified by phenol-chloroform separation using Trizol (Life Technologies, Cat# 15596-026). 800ng/μL of sgRNA was injected into *actin-Cas9* embryos (*y<sup>1</sup> P(act5c-cas9, w+) M(3xP3-RFP.attP)ZH-2A w\**) (35).

After injection, *kmg* loss-of-function alleles were identified genetically by failure to complement a *kmg* deficiency, under the assumption that the testis phenotype of *kmg* CRISPR mutant/Deficiency would resemble that of *kmg* knock down (KD). Single injected founder flies were crossed individually to flies carrying a 191.2kb deficiency that removes *kmg* locus (*Df(2L)ED779/SM6a*). If any male F1 flies that did not carry SM6a (*potential CRISPR allele/Df*) had a testis phenotype similar to *kmg* KD, this meant that it was likely that at least one germline stem cell in the founder male contained a *kmg* loss-



of-function mutation. In that case, over 50 single sibling F1 potential *CRISPR allele/SM6a* male progeny from that founder were crossed individually to deficiency virgin females (*Df(2L)ED779/SM6a*) to identify germline transmitted lines. From 32 injected founder lines, four different lines with 1, 4, 7, or 10 bp frameshift mutations were obtained. The final line used for subsequent experiments, designated *kmg<sup>A7</sup>*, had a 7 bp deletion after the 31<sup>st</sup> base pair from the start codon, which introduced a premature stop codon at the position of the 45<sup>th</sup> amino acid. The *kmg<sup>A7</sup>* line was crossed to *w<sup>1118</sup>* and double balancer lines to replace chromosomes X and III with chromosomes X and III from non-CRISPR targeted animals to remove potential off-target mutations. To minimize probable background off-target mutations on chromosome II, the *kmg<sup>A7</sup>* allele was recombined to the second chromosome of *w<sup>1118</sup>* twice and selected again by crossing to deficiency virgin females (*Df(2L)ED779/SM6a*).

The *kmg<sup>A7</sup>* allele was not a null, potentially due to initiation of translation from an internal start codon. The phenotype of *kmg<sup>A7</sup>/Df* was slightly weaker than *kmg* KD, and germ cells from *kmg<sup>A7</sup>/Df* testis occasionally progressed to post-meiotic stages, unlike germ cells in *kmg* KD testes cultured at 30°C. Western blot analysis of testes from *kmg<sup>A7</sup>/Df* animals showed that a very small amount of truncated Kmg protein was produced in *kmg<sup>A7</sup>/Df* testis, as detected by Kmg antibody against the C terminus (fig. S4G). Knock down of *kmg* in a *kmg<sup>A7</sup>/Df* background removed residual truncated protein in *kmg<sup>A7</sup>/Df* (fig. S4G), and testes from *kmg<sup>A7</sup>/Df; kmg* KD animals did not have any post-meiotic germ cells (fig. S4F). Because *kmg* contains multiple in-frame start codons immediately downstream of the premature stop-codon (4 start codons within 150bp), we postulate that translational initiation from an internal AUG produced a low-level of functional Kmg protein in *kmg<sup>A7</sup>/Df* spermatocytes. A similar phenomenon has been observed in human genetic studies (51), and we recommend checking for the presence of in-frame downstream AUGs when designing a CRISPR-based knock out strategy.

#### Analysis of cryptic promoters by automated transcript assembly

To assemble unannotated transcripts, Cufflinks (ver. 2.2.1) (52) was used without providing transcript annotations. 143 genes that were expressed in both *kmg* KD testes and in wild-type heads were chosen, and the distance between the TSS of annotated transcripts and the nearest TSS of the assembled non-canonical transcripts predicted by Cufflinks were calculated. This distance analysis showed that only 16% (24% of *dMi-2* KD) of the transcripts misexpressed in *kmg* KD testes were predicted to start within 100bp of the nearest annotated TSSs, whereas 70% of the predicted transcripts from wild-type heads started within 100bps of the annotated TSSs (fig. S9B-D). These non-canonical transcripts were initiated from either upstream (44% for *kmg* KD and 37% for *dMi-2* KD) or downstream (40% for *kmg* KD and 40% *dMi-2* KD, fig. S9C and D) of annotated transcripts.

## Identification of transcription start sites from cryptic promoters by visual inspection and analysis on binding of Aly to these sites

We identified non-canonical transcription start sites (TSSs) by visual inspection because automatic transcript assembly often produced inaccurate hybrid or broken transcripts. The location of non-canonical TSSs for normally somatically expressed genes that were misexpressed in *kmg* KD and *dMi-2* KD testes were identified using the following criteria:

- 1) Only mapped RNA-Seq reads that were on the same strand as the misexpressed transcripts identified by microarray were considered.
- 2) The positions of potential cryptic promoters showed a dramatic and abrupt increase in the number of mapped reads in *kmg* KD compared to wild-type testes, and were located upstream of the 3' end of misexpressed transcripts identified by microarray.
- 3) The mapped RNA-Seq reads that showed abrupt increase were either part of or spliced to the annotated exons of the misexpressed transcripts.
- 4) The position of abrupt increase in mapped RNA-Seq reads is a TSS but not a splice acceptor site. In other words, the mapped RNA-Seq reads that showed abrupt increase did not have part of the reads that were also mapped to upstream annotated exons by splicing.

Visual inspection based on the above criteria using RNA-Seq mapping visualized in the Integrative Genome Browser (*Drosophila melanogaster genome 6.07*) identified 346 transcription start sites associated with the 440 misexpressed genes identified from microarray (table S6). Not all of the 440 genes were assigned with transcription start sites based on the visual inspection criteria above, as in some cases the increase in the number of mapped reads was not abrupt at the potential TSSs or the number of reads was small and it was not clear whether the reads might be spliced to regions further upstream.

The location of the TSSs identified for the misexpressed genes in *kmg* KD was compared with the location of Aly peaks ( $q < 10^{-5}$ ) identified by ChIP of Aly from *kmg* KD testes. If there was an Aly peak with its summit position within 100bp of the non-canonical TSSs for the misexpressed transcripts, the gene was scored as having a coinciding Aly peak in its cryptic promoter. For simplicity, genes with TSSs within 100bps of annotated TSSs were merged into the category of 'upstream' and 'downstream' based on their relative positions of TSSs with respect to the annotated TSSs.

## Analysis of differentiation stage of *kmg* KD; *aly*<sup>-/-</sup> germ cells

Morphological and molecular analyses suggested that the germ cells in the *kmg* KD; *aly*<sup>-/-</sup> animals reach a comparable stage where the misexpression of somatic genes was initiated in the *kmg* KD germ cells.

First, the size of nuclei of germ cells in *kmg* KD; *aly*<sup>-/-</sup> testes reached the size of nuclei in the germ cells of *kmg* KD testes in which Pros protein was detected. One of the

hallmarks of spermatocyte differentiation is a drastic growth in cell and nuclear size. The area of germ cell nuclei was measured by ImageJ on single confocal sections of testes stained with Vasa (a germ cell marker). Since different parts of nuclei can be seen under a single optically sectioned plane, nuclei sectioned at a plane far from their full area (distinguished by blurry nuclear boundary) were not included in the measurements (individual measurement values in situ can be provided upon request). When nuclear area was plotted with respect to distance from the tip of testes in *kmg* KD and *kmg* KD; *aly*<sup>-/-</sup> testes, nuclear size gradually increased as the cells displaced away from the testis tip. Pros protein started to be misexpressed in *kmg* KD testes when nuclear size reached around 100μm<sup>2</sup> (fig. S13A), and nuclear size continued to increase after expression of Pros initiated. Importantly, nuclei in *kmg* KD; *aly*<sup>-/-</sup> germ cells grew beyond 100μm<sup>2</sup> (fig. 13A) the stage when the *kmg* KD germ cells start to misexpress Pros.

Second, cells in the *kmg* KD; *aly*<sup>-/-</sup> testes expressed transcripts that started to be upregulated when the cells reach the stage where they start to misexpress Pros. To identify the exact stage of differentiation when Pros started to be misexpressed, we utilized the heat shock induced time course differentiation assay, by assessing misexpression in synchronously differentiating germ cells in which *kmg* had been knocked down in spermatocytes by RNAi. Six transcripts that showed robust misexpression in *kmg* KD testes were surveyed to identify the spermatocyte stage when these transcripts started to be misexpressed. Three of these transcripts were misexpressed by 48 hours from the induction of differentiation and by 72 hours all six transcripts were strongly misexpressed (fig. S13B). Next, to identify the normal transcripts that start to be expressed later than 48 hours after induction of differentiation, we normalized microarray data from *hs-Bam*; *bam*<sup>-/-</sup> (no heat shock, 24 hours and 48 hours post heat shock), *aly*<sup>-/-</sup>, wild-type, *kmg* KD, *kmg* KD; *aly*<sup>-/-</sup> testes together. Then we identified 751 genes that were activated in spermatocytes compared to spermatogonia independent of Aly function by comparing expression levels of *aly*<sup>-/-</sup> vs. *hs-Bam*; *bam*<sup>-/-</sup> (without heat shock, representing spermatogonia; 16 fold higher in *aly*<sup>-/-</sup> vs. *hs-Bam*; *bam*<sup>-/-</sup> without heat shock). Among these Aly-independent genes upregulated during spermatocyte differentiation, 148 genes that were activated after the stage when the misexpression begins in *kmg* KD were selected by choosing genes that were not yet activated in 48 hours post heat shock testes (less than 2-fold higher in 48 hours post heat shock vs. no heat shock for *hs-Bam*; *bam*<sup>-/-</sup> testes) (table S8). This set of 148 Aly independent 'late-activated' genes showed comparable expression levels in *kmg* KD vs. *kmg* KD; *aly*<sup>-/-</sup> testes (fig. S13C), suggesting that the transcriptional program of germ cells in *kmg* KD; *aly*<sup>-/-</sup> reached at least the stage when the misexpression of somatic genes initiated in *kmg* KD germ cells.

**Figure S1. A pulse of Bam expression induced synchronized differentiation of *bam*<sup>-/-</sup> germ cells**

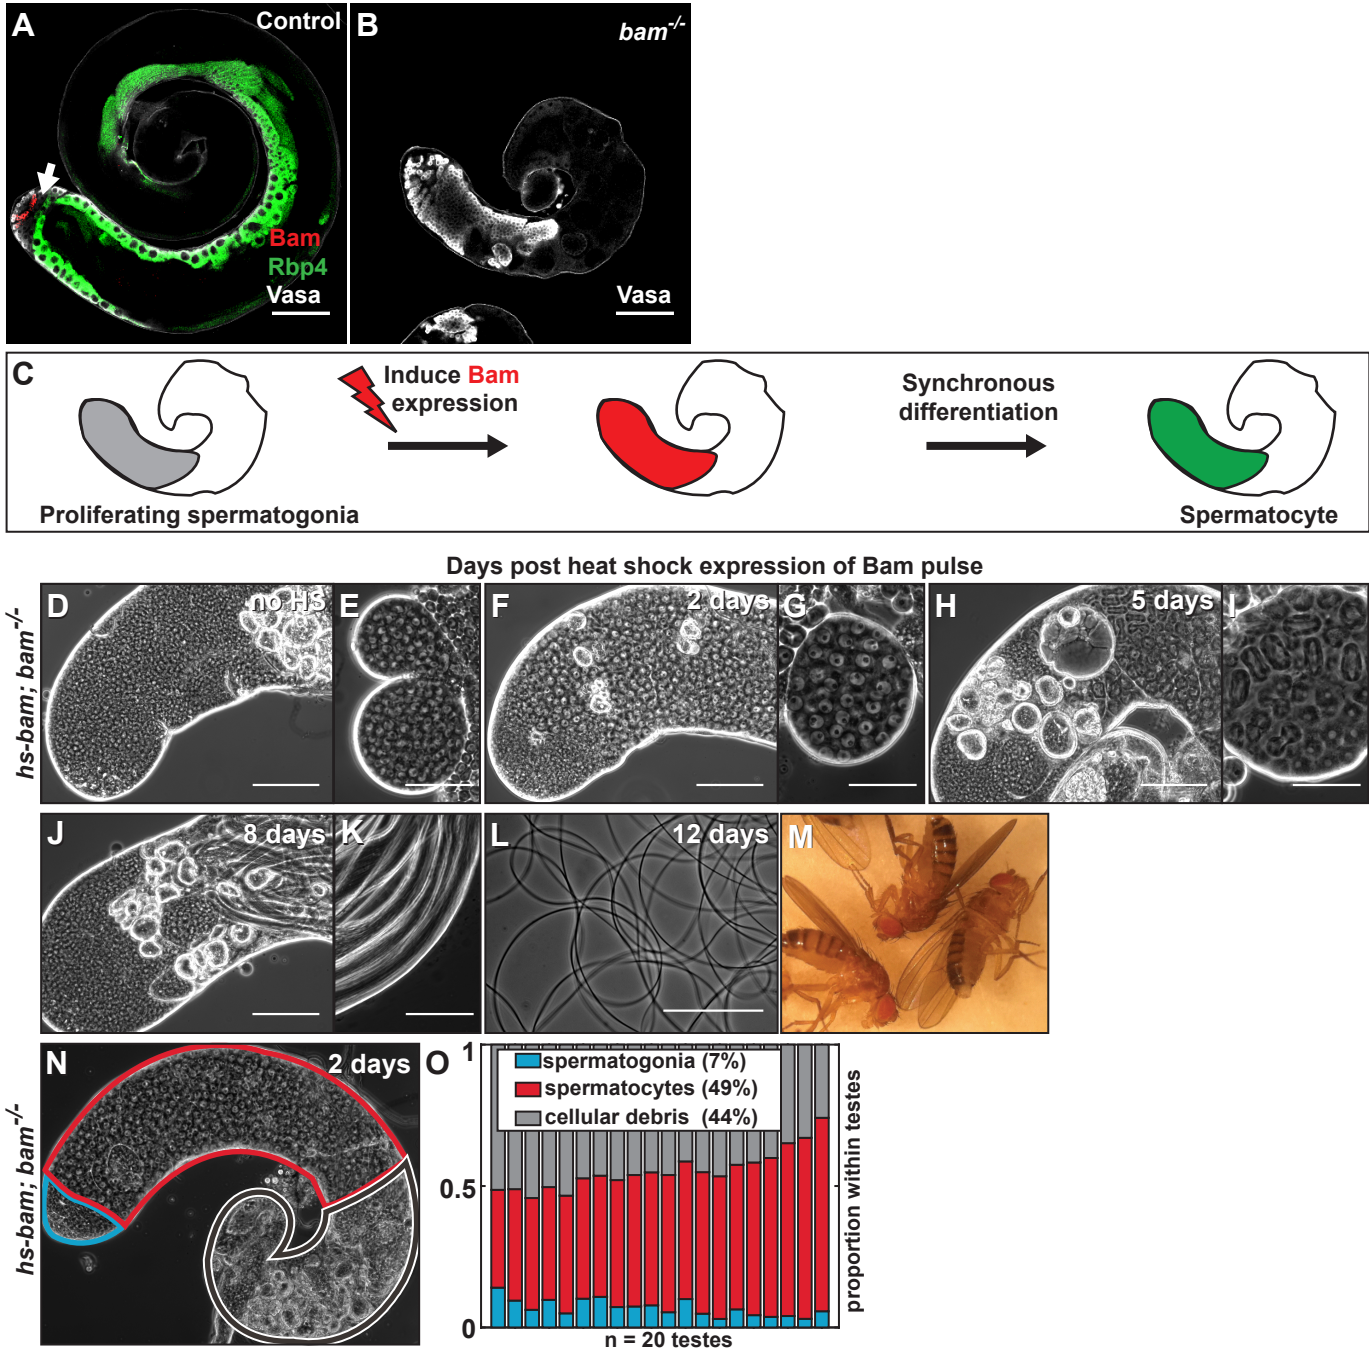

**Fig. S1 A pulse of Bam expression induced synchronized differentiation of *bam*<sup>-/-</sup> germ cells**

(A) Testis stained for Vasa (white, all germ cells), Bam-HA (red, late transit amplifying (TA) cells), and Rbp4-YFP (green, spermatocytes) from a fly carrying *bamP-Bam-HA* and *rbp4P-Rbp4-YFP* transgenes. Arrow marks germ cells initiating spermatocyte differentiation.

(B) Testis from *bam*<sup>-/-</sup> stained for Vasa (white).

(C) Schematic of synchronous differentiation strategy.

(D-K) Phase-contrast images of *hs-bam; bam*<sup>-/-</sup> testes (D and E) before heat shock, (F and G) 2 days post heat shock (PHS), (H and I) 5 days PHS and (J and K) 8 days PHS. (E, G and I) cysts and (K) elongating spermatids dissected from testes.

(L) Phase-contrast image of motile sperm dissected from *hs-bam; bam*<sup>-/-</sup> testes 12 days PHS.

(M) Progeny from *hs-bam; bam*<sup>-/-</sup> male flies that underwent *in vivo* differentiation of germ cells by a heat shock induced pulse expression of Bam.

(N) Phase-contrast image of an entire *hs-bam; bam*<sup>-/-</sup> testis 2 days PHS. (Blue) proliferating spermatogonia. (Red) synchronously differentiating spermatocytes. (Gray) dying or dead cellular debris.

(O) Bar graph showing proportion of different cellular populations outlined in (N) by area in squashed preparation at 2 days PHS for 20 testes.

Scale bars: 100µm in A, B, D, F, H, J and L; 50µm in E, G, I and K.

**Figure S2. Synchronously differentiating germ cells switch to terminal differentiation by 24 hours after pulse expression of Bam**

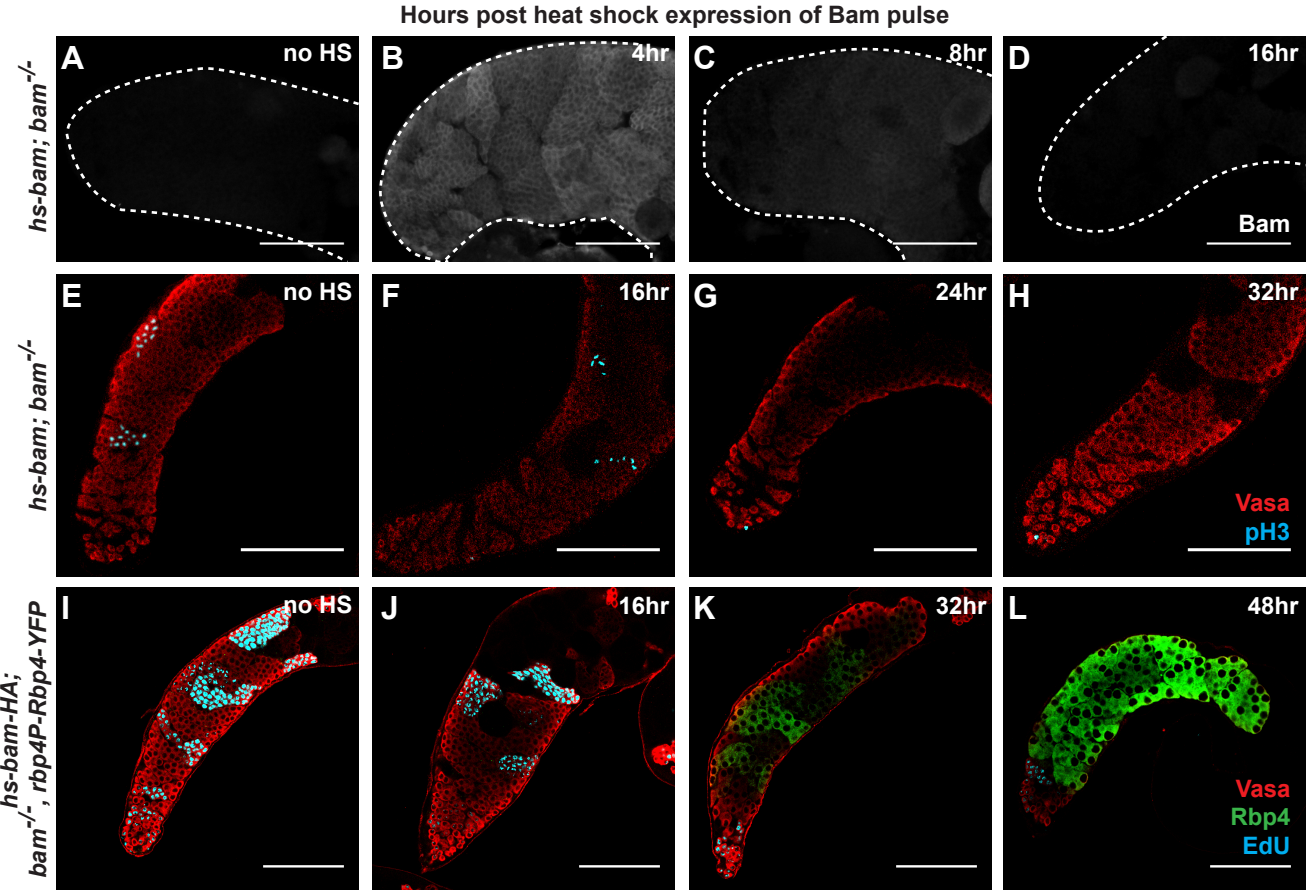

**Fig. S2 Synchronously differentiating germ cells switch to terminal differentiation by 24 hours after pulse expression of Bam**

(A-D) Testes from *hs-bam; bam<sup>-/-</sup>* flies stained for Bam (A) without heat shock, (B) 4 hours, (C) 8 hours and (D) 16 hours PHS.

(E-H) Testes from *hs-bam; bam<sup>-/-</sup>* flies stained for Vasa (red) and phosphorylated Histone 3 (pH3, cyan) (E) without heat shock, (F) 16 hours, (G) 24 hours and (H) 32 hours PHS.

(I-L) Testes from *hs-bam-HA; bam<sup>-/-</sup>, rbp4P-Rbp4-YFP* flies stained for Vasa (red), Rbp4-YFP (green), and incorporated EdU (Cyan) (I) without heat shock, (J) 16 hours, (K) 32 hours and (L) 48 hours PHS.

Scale bars: 100 $\mu$ m.



**Figure S3. Kmg is expressed early in spermatocyte differentiation**

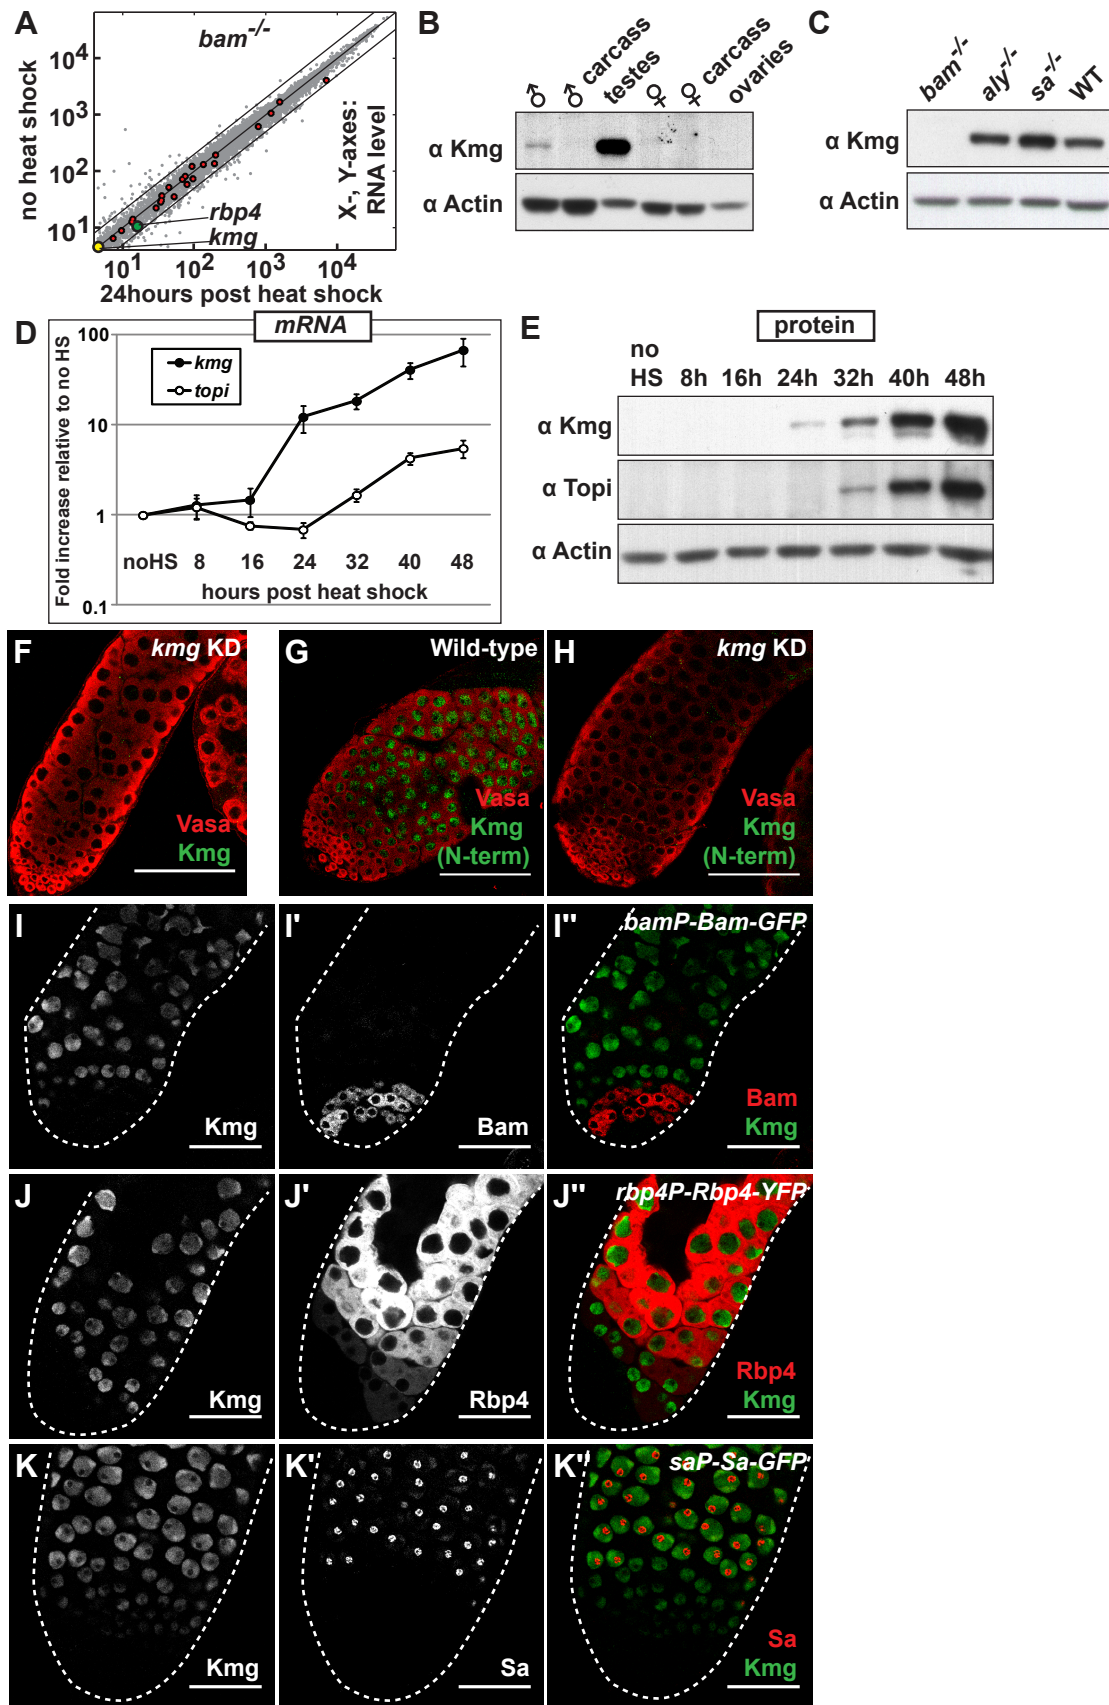



### Fig. S3 Kmg is expressed early in spermatocyte differentiation

(A) Scatter plot comparing microarray data on gene expression between no heat shock vs. 24 hour PHS testes from *bam*<sup>-/-</sup> (n = 1) to control for the effect of heat shock. (red dots) Significantly upregulated transcripts in Fig. 1C (*hs-Bam*; *bam*<sup>-/-</sup>).

(B) Western blot of Kmg protein in lysates of whole or gonadectomized males or females, testes and ovaries.

(C) Western blot of Kmg protein in lysates from *bam*<sup>-/-</sup>, *aly*<sup>-/-</sup> (*tMAC*), *sa*<sup>-/-</sup> (*tTAF*) and wild-type testes.

(D) Expression of mRNAs for *kmg* and *topi* (a *tMAC* subunit) in testes during the time course assessed by qRT-PCR. Error bars: standard deviation (n = 3).

(E) Western blot of Kmg and Topi protein from testes from the differentiation time course.

(F) Testis from *kmg* KD flies stained for Vasa (red) and Kmg (green) with antibody directed against a C-terminal region of Kmg.

(G and H) Testes from (G) wild-type and (H) *kmg* KD flies stained for Vasa (red) and Kmg (green) with antibody directed against an N-terminal region of Kmg.

(I-K'') Immunofluorescence images of (I, J and K) Kmg, (I') Bam, (J') Rbp4, (K') Sa, (I'', J'' and K'', merge) (Green) Kmg, (Red) Bam, Rbp4 or Sa in testes bearing (I-I'') *bamP-Bam-GFP*, (J-J'') *rbp4P-Rbp4-YFP* and (K-K'') *saP-Sa-GFP* transgenes. GFP and YFP were visualized by native fluorescence. White dotted lines represent testis outlines.

Scale bars: 100  $\mu$ m in F-H; 50  $\mu$ m in I-K''.

# Figure S4. Kmg is required for spermatocyte differentiation

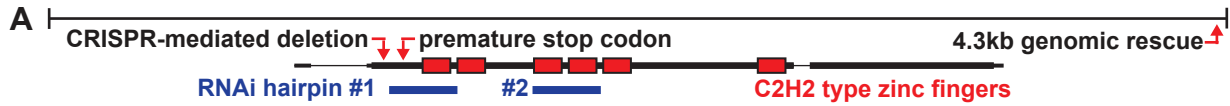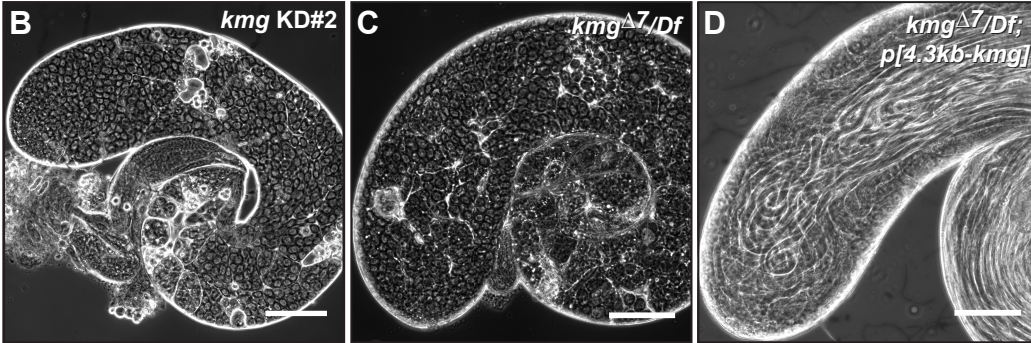

**E**

|                             |                                                              |                    |
|-----------------------------|--------------------------------------------------------------|--------------------|
| wild-type                   | AAAAATCCAAGGAAAAATTTTGCTTGTTCAGATTTTGTCAAGTC                 | Start codon        |
| <i>kmg</i> [Δ7] / <i>Df</i> | AAAAATCCAAGGAAAAATTTTGCTTGTTCAGATTTTGTCAAGTC                 | ATC GAGCTGCCTTCAAT |
|                             | *****                                                        |                    |
|                             | cut                                                          | PAM                |
| wild-type                   | GGTGGAGCGTTCGGGGTGATCGCTTGGTGGTGCAGCTTGGTTAGTGGTGCCTCACTTTA  |                    |
| <i>kmg</i> [Δ7] / <i>Df</i> | GGTGGAGCGTTCGG-----CTTGGTGGTGCAGCTTGGTTAGTGGTGCCTCACTTTA     |                    |
|                             | *****                                                        |                    |
|                             | frameshift                                                   |                    |
| wild-type                   | TCAGTCATCTATTGAGGGCGGAGCAGGTGCTGTGCTTCCTATGTCCCAAAGCGTGCAGCC |                    |
| <i>kmg</i> [Δ7] / <i>Df</i> | TCAGTCATCTATTGAGGGCGGAGCAGGTGCTGTGCTTCCTATGTCCCAAAGCGTGCAGCC |                    |
|                             | *****                                                        |                    |

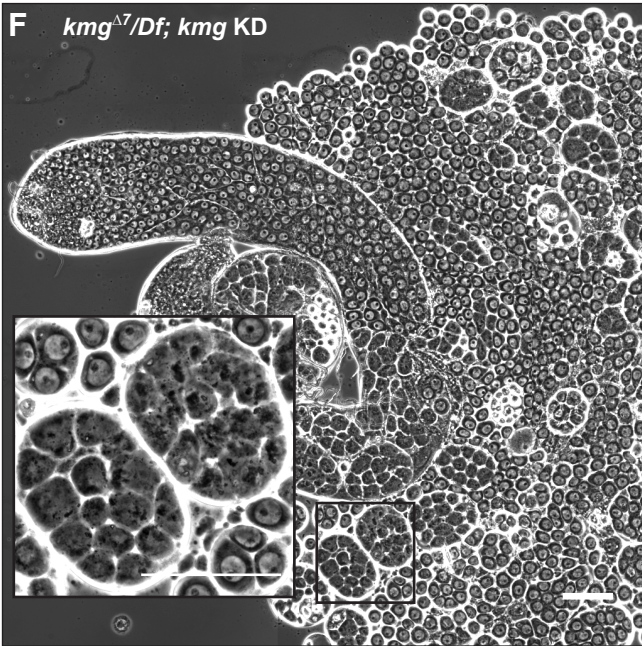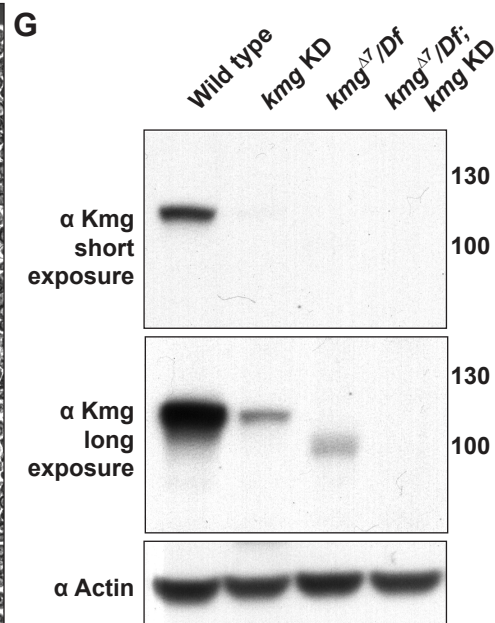

### Fig. S4 Kmg is required for spermatocyte differentiation

(A) Diagram of the *kmg* locus: (thin lines) introns, (thick lines) exons, (medium lines) 5' and 3' UTRs. (Red) C2H2-type zinc fingers, (Blue) position of RNAi hairpins.

(B-D) Phase-contrast images of (B) *kmg* KD with RNAi hairpin targeted to region #2 in the diagram on (A), (C) *kmg*<sup>A7</sup>/*Df* and (D) *kmg*<sup>A7</sup>/*Df*; *p[4.3kb-kmg]* testes.

(E) DNA sequence of *kmg* CRISPR mutant with 7 base pair deletion showing the start codon (green), region targeted by the CRISPR guide RNA (yellow) and the PAM motif (cyan). (red triangle) the position predicted to be cut by Cas9 nuclease.

(F) Phase-contrast image of a testis from a *kmg*<sup>A7</sup>/*Df*; *kmg* KD fly. Testis sheath was opened before squashing to spread out intact spermatocyte cysts. Inset shows enlarged images of the most advanced germ cell cysts prior to cell death.

(G) Western blot of Kmg protein with testis lysates from wild-type, *kmg* KD, *kmg*<sup>A7</sup>/*Df* and *kmg*<sup>A7</sup>/*Df*; *kmg* KD flies. Numbers on right show molecular weight based on the positions of size markers.

Scale bars: 100µm in B-D and F.

**Figure S5. Kmg prevents expression of non-spermatogenic transcripts**

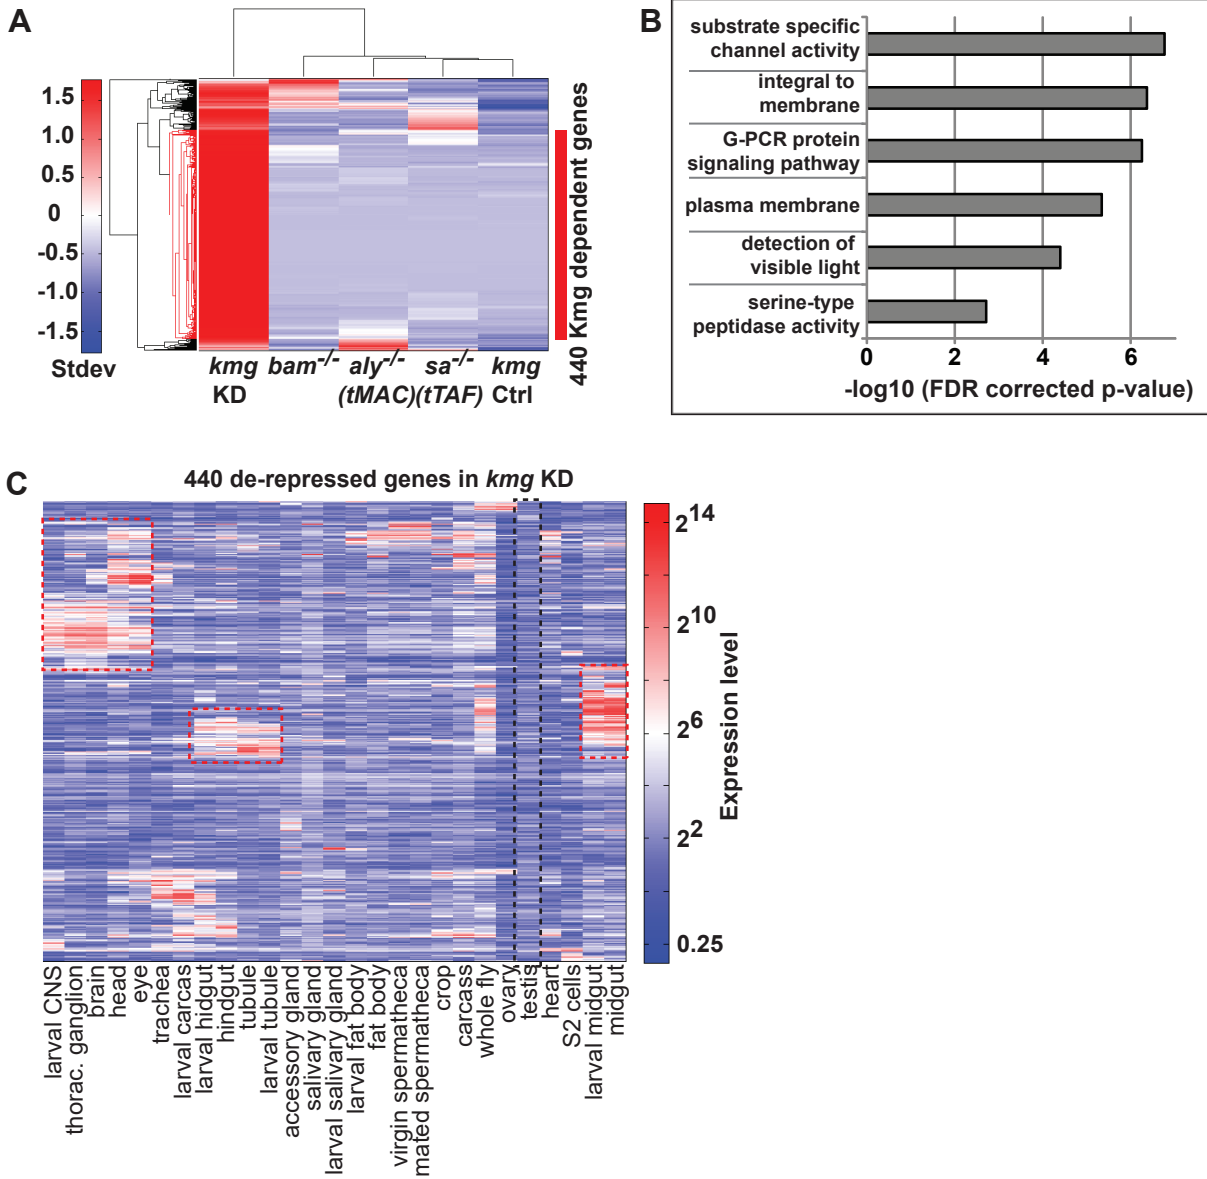

**Fig. S5 Kmg prevents expression of non-spermatogenic transcripts**

(A) Hierarchical clustering of abnormally upregulated transcripts in *kmg* KD testes based on their expression in testes with different mutations *bam*<sup>-/-</sup>, *aly*<sup>-/-</sup> (*tMAC*) and *sa*<sup>-/-</sup> (*tTAF*). (red bar) 440 transcripts detected by microarray as upregulated in *kmg* KD testes but not in other genotypes.

(B) Most significantly enriched Gene Ontology (GO) terms for 440 genes de-repressed in *kmg* KD testes.

(C) Hierarchical clustering of 440 genes de-repressed in *kmg* KD testes according to their expression in 27 different tissues or cell types (*11*). Black rectangle: expression in wild-type testes; Red rectangles: examples of expression in specific somatic tissues.

**Figure S6. Ubiquitous expression of dMi-2 and co-localization with Kmg in spermatocytes**

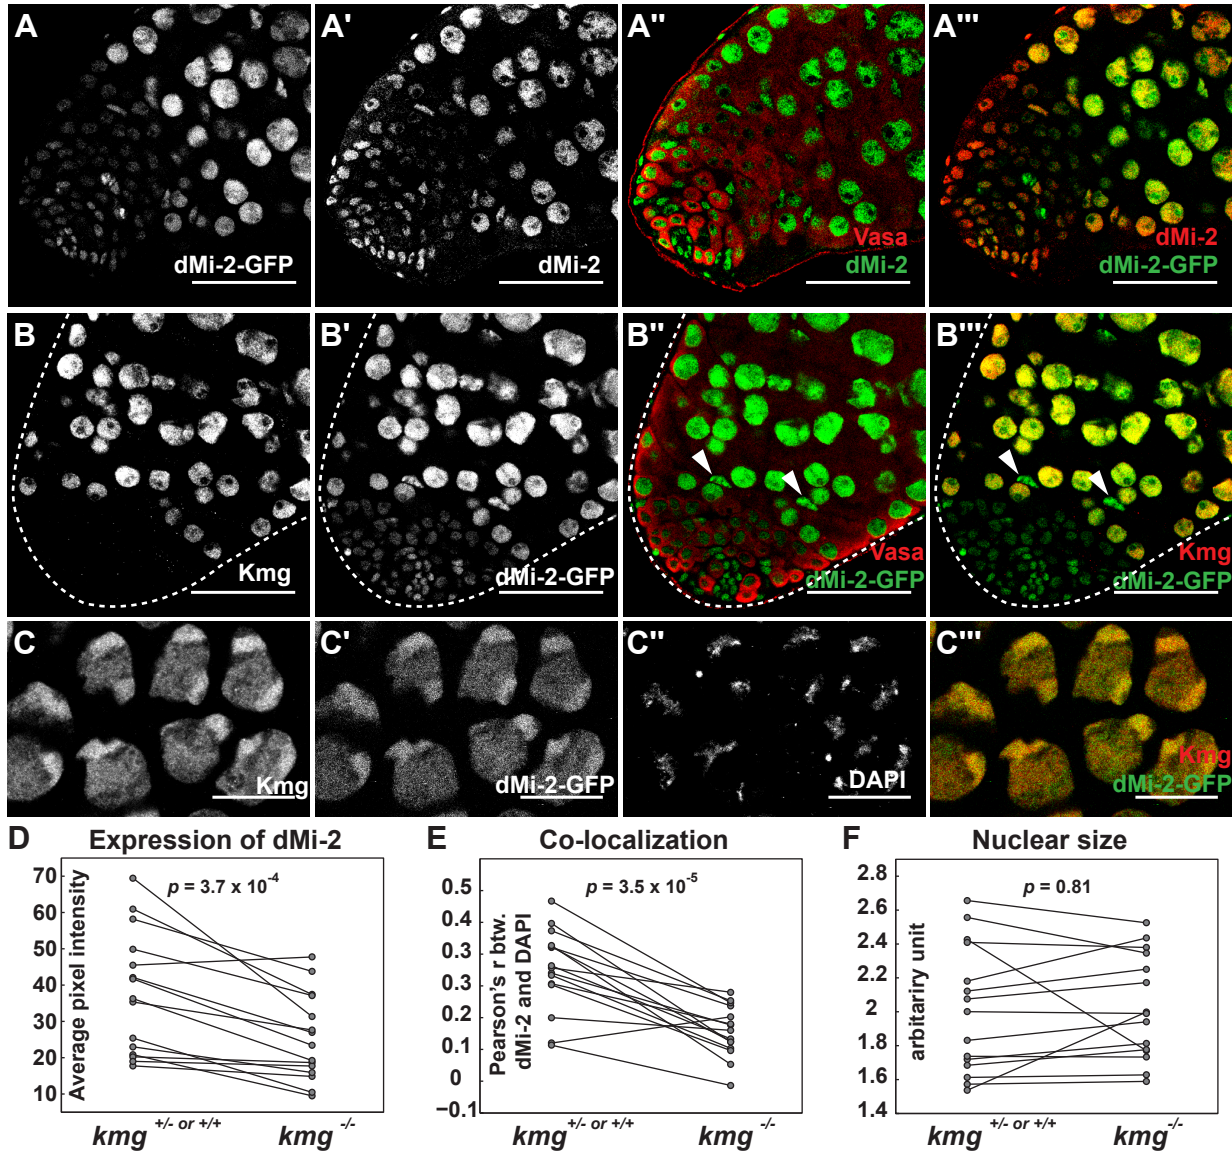

**Fig. S6 Ubiquitous expression of dMi-2 and co-localization with Kmg in spermatocytes**

(A-A''') Immunofluorescence images of (A) dMi-2-GFP, (A') dMi-2, (A'', merge) Vasa (red), dMi-2 (green), (A''', merge) dMi-2 (red), dMi-2-GFP (green) in a testis from a fly bearing one copy of a dMi-2-GFP protein trap at the endogenous locus heterozygous with a wild-type allele. dMi-2-GFP was visualized by its native fluorescence.

(B-C''') Immunofluorescence images of (B and C) Kmg, (B' and C') dMi-2-GFP, (B'', merge) Vasa (red), dMi-2-GFP (green), (C'') DAPI, (B''' and C''', merge) Kmg (red), dMi-2-GFP (green). (B-B''') Testis apical tip. (B'' and B''', arrowheads) Nuclei of somatic cyst cells, which express dMi-2 but not Kmg. (C-C''') Mid-testis showing mature spermatocytes from flies bearing a dMi-2-GFP protein trap. dMi-2-GFP was visualized by native fluorescence.

(D-F) Quantification of (D) expression level of dMi-2 protein, (E) co-localization of dMi-2 protein and chromatin represented by DAPI staining and (F) the size of measured nuclei in *kmg*<sup>+/+ or +/-</sup> or *kmg*<sup>-/-</sup> spermatocytes. Only directly neighboring cysts on the same z-plane were measured and compared. T-test (two-tailed, paired) was performed to test statistical significance (n = 15).

Scale bars: 50µm in A-B'''; 25µm in C-C'''.



**Figure S7. Kmg and dMi-2 ChIP-Seq and RNA-Seq expression of Kmg bound genes**

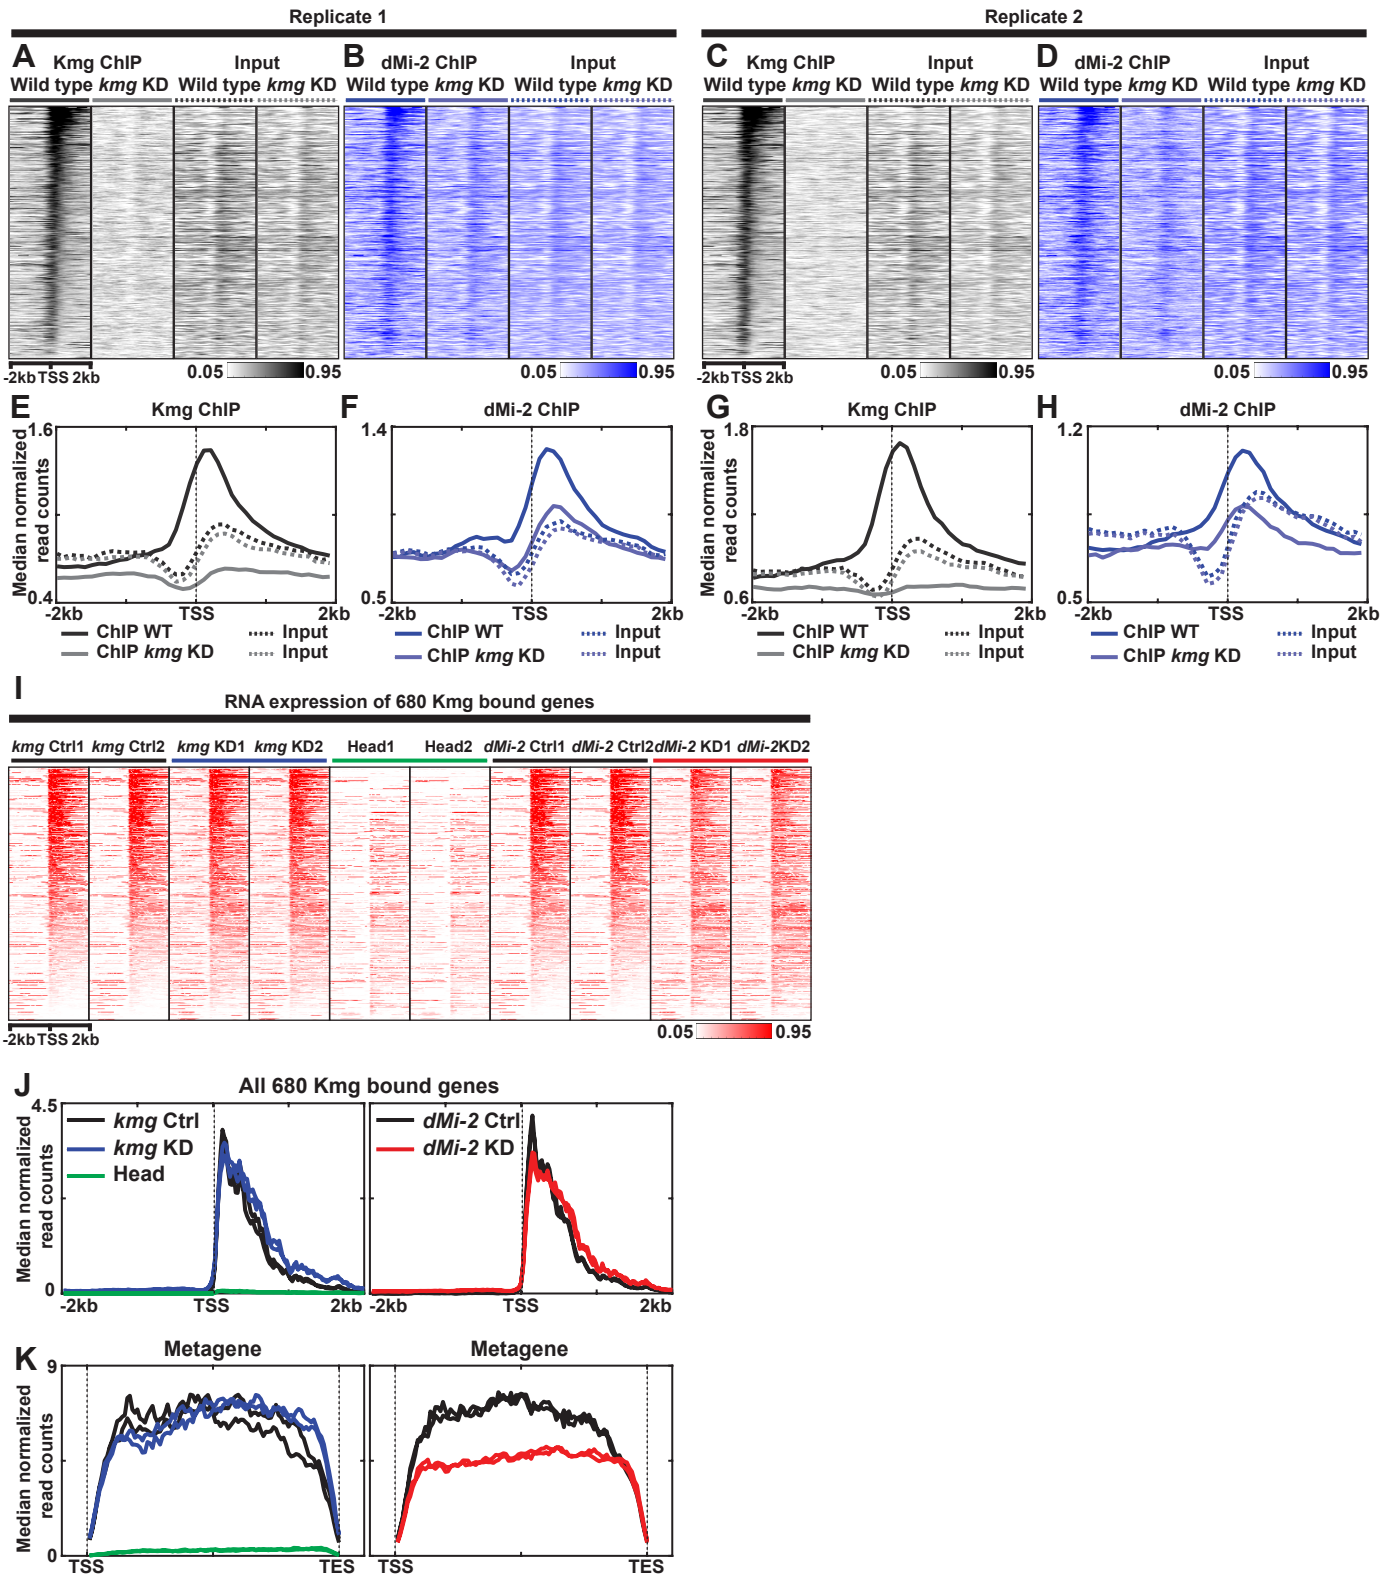



**Fig. S7 Kmg and dMi-2 ChIP-Seq and RNA-Seq expression of Kmg bound genes**

(A-D) Heatmap representation of normalized read counts on genomic regions  $\pm 2$ kb of the transcription start sites (TSSs) for 680 Kmg bound genes. (A and B) Replicate 1, the same dataset represented as median plots in (E) and (F). (C and D) Replicate 2, the same dataset represented as median plots in (G) and (H). Lightest (white) color represents a read count value at the 5th percentile. Darkest (black or blue) color represents read count values at the 95th percentile.

(E-H) Median profile of Kmg and dMi-2 ChIP (solid lines) and corresponding input (dotted lines) signals for 680 Kmg bound genes for genomic regions centered at the TSS for data shown in (A-D).

(I) Heatmap representation of normalized RNA-seq read counts for 680 Kmg bound genes for region  $\pm 2$ kb of TSS. Lightest (white) color represents read count values at the 5th percentile. Darkest (red) color represents read count values at the 95th percentile.

(J-K) (J) Median RNA expression profile centered at the TSSs and (K) metagene median RNA expression profile plotted proportional to transcript for 680 Kmg bound genes. RNA-Seq read counts from testes from (Blue) *kmg* KD or (Red) *dMi-2* KD, and (Black) corresponding control animals, as well as from (Green) wild-type heads were plotted.

For all plots in Fig. S7, read counts were plotted according to the direction of transcription from 5' to 3'.

**Figure S8. Kmg bound genes are actively expressed in the testes**

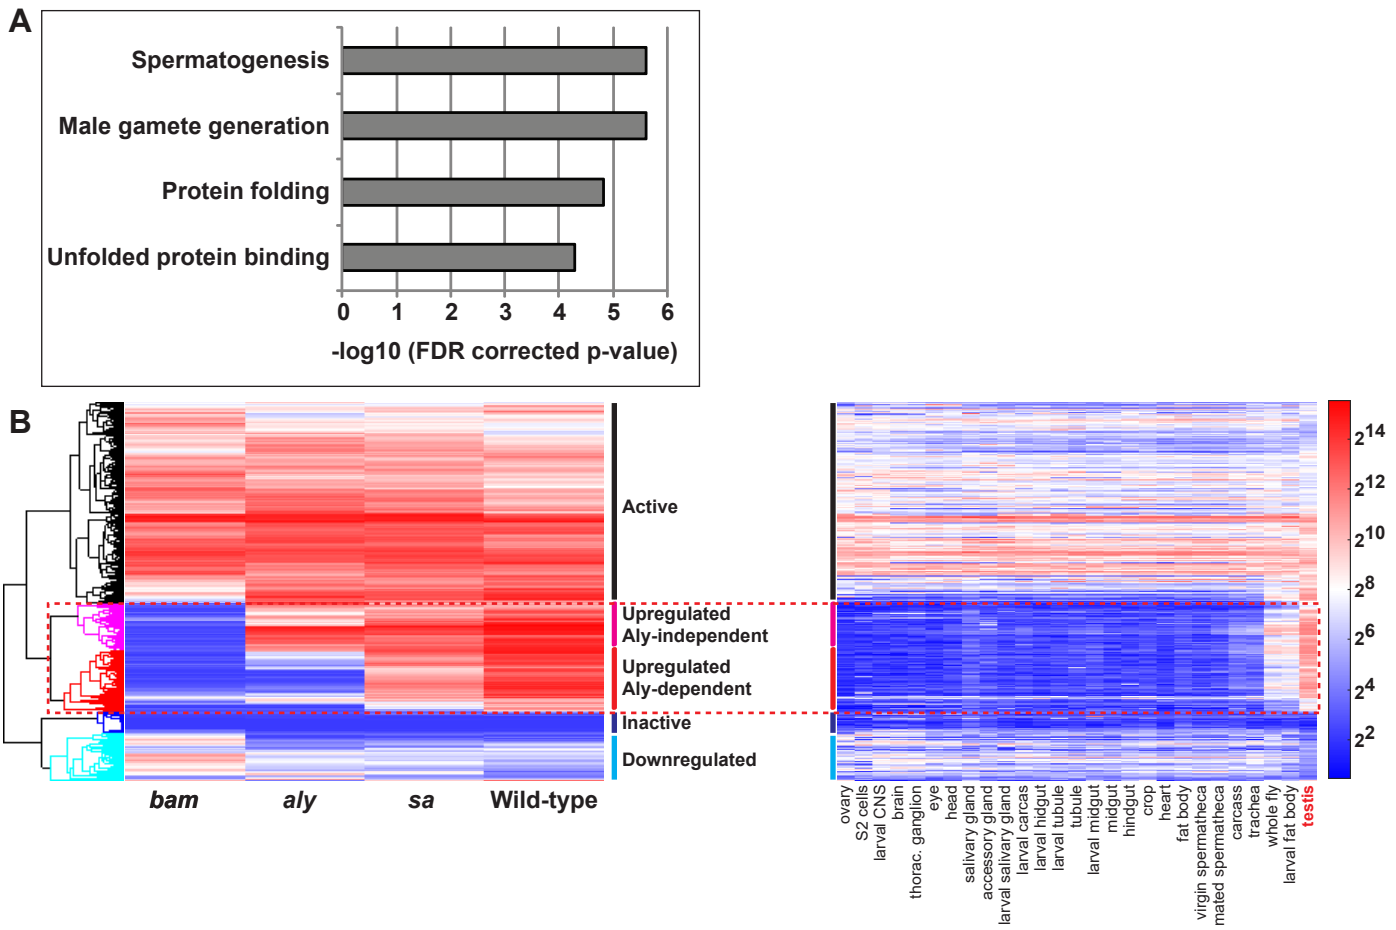

**Fig. S8 Kmg bound genes are actively expressed in the testes**

(A) Most significantly enriched Gene Ontology (GO) terms for 680 genes most robustly bound by Kmg.

(B) Left heat map: Hierarchical clustering of genes robustly bound by Kmg based on their expression in testes with different mutations *bam*<sup>-/-</sup>, *aly*<sup>-/-</sup> (*tMAC*) and *sa*<sup>-/-</sup> (*tTAF*). Right heat map: Expression of genes that are bound by Kmg clustered based on their similarity in expression between 27 different tissues in flies. Red rectangle represents genes that become activated in spermatocytes, and show little expression in many other tissues.

**Figure S9. Misexpression from cryptic promoters**

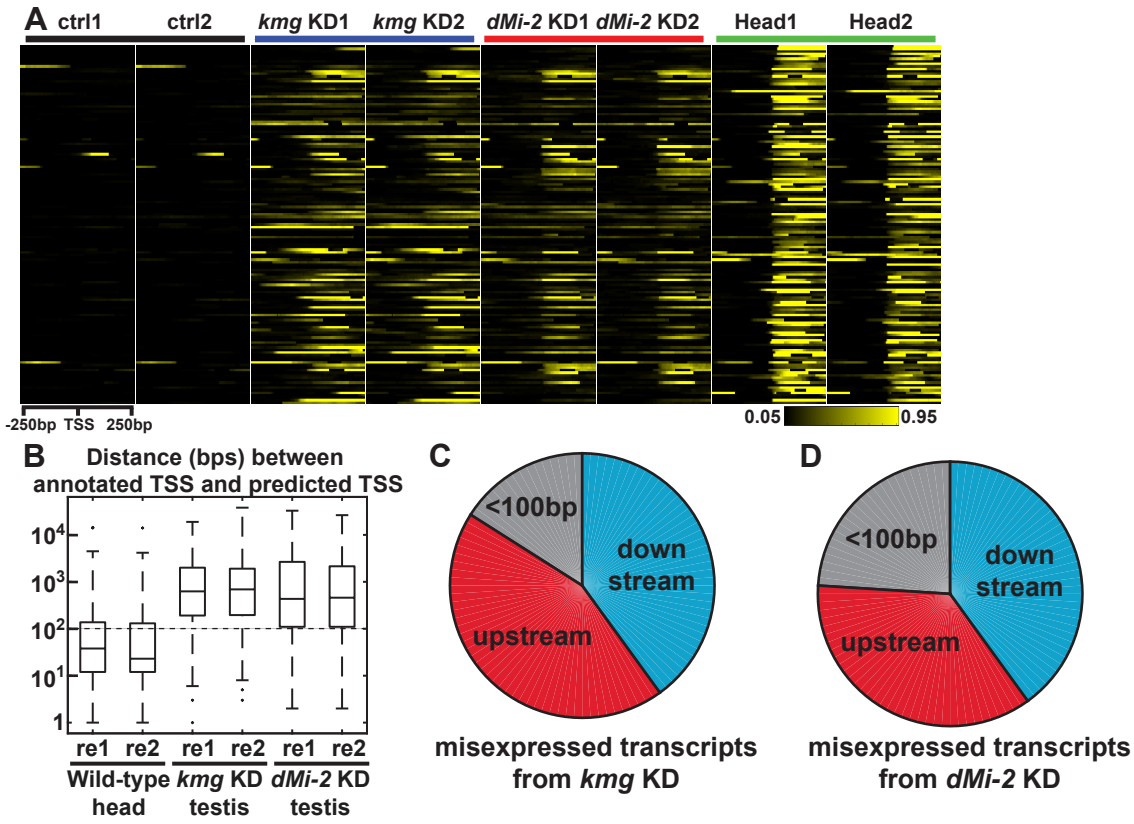

### **Fig. S9 Misexpression from cryptic promoters**

(A) Heatmap representation of normalized RNA-seq read counts of 143 transcripts that were misexpressed in *kmg* KD testes and also normally expressed in wild-type heads, centered at transcription start sites (TSSs)  $\pm 250$ bp annotated based on Ensembl database (BDGP6.82). Darkest (black) color: read count value at the 5th percentile. Brightest (yellow) color: read count value at 95th percentile. Read counts were plotted according to the direction of transcription from 5' to 3'.

(B) Box plot representation of distances from annotated TSSs in Ensembl database and the nearest TSSs predicted from transcript assembly by Cufflinks for the transcripts represented in (A). (whiskers) the most extreme data points excluding outliers.

(C and D) Relative locations with respect to the nearest annotated TSSs of predicted TSSs (of the transcripts represented in (A)).

Figure S10. Aly-HA transgene rescues *aly*<sup>-/-</sup> phenotype

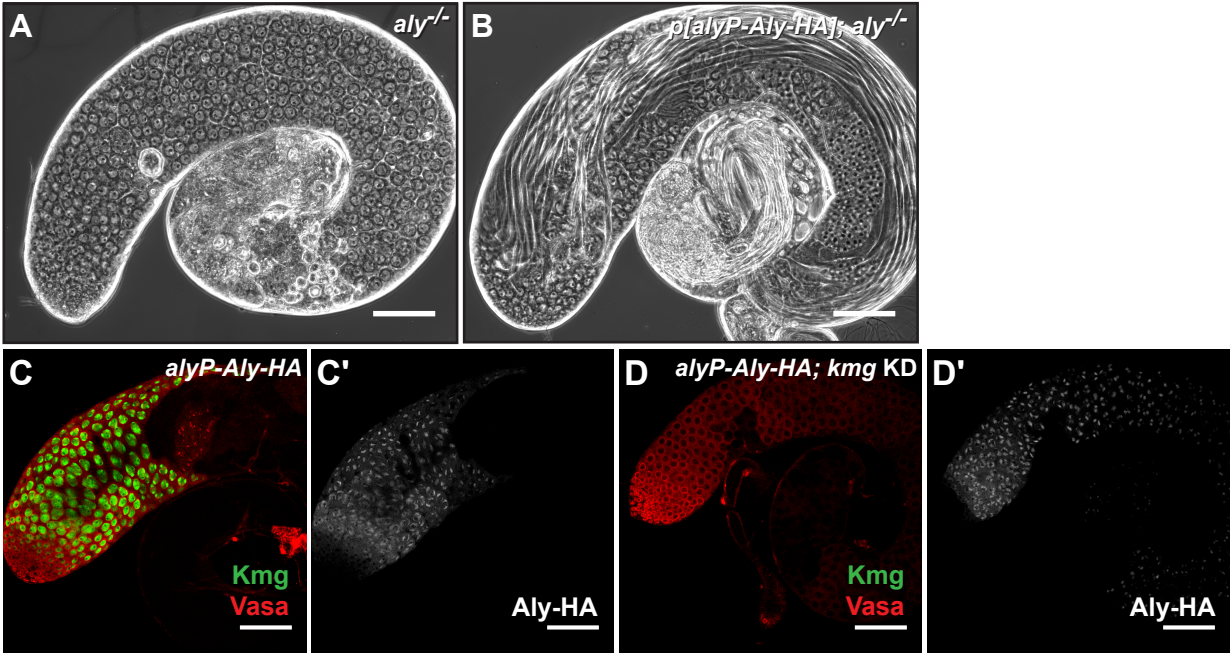

**Fig. S10 Aly-HA transgene rescues *aly*<sup>-/-</sup> phenotype**

(A and B) Phase-contrast images of (A) *aly* mutant (*aly*<sup>-/-</sup>) and (B) *aly* mutant rescued by a transgene containing the *aly* promoter driving expression of Aly-HA (*p[alyP-Aly-HA]; aly*<sup>-/-</sup>).

(C - D') Immunofluorescence images (C and D, merge) (Red) Vasa, (Green) Kmg; (C' and D') Aly-HA in testes from (C and C') *alyP-Aly-HA* and (D and D') *alyP-Aly-HA; kmg* KD.

Scale bars: 100μm.

**Figure S11. AGYWGGC motif at cryptic promoters bound by Aly in *kmg* KD testes**

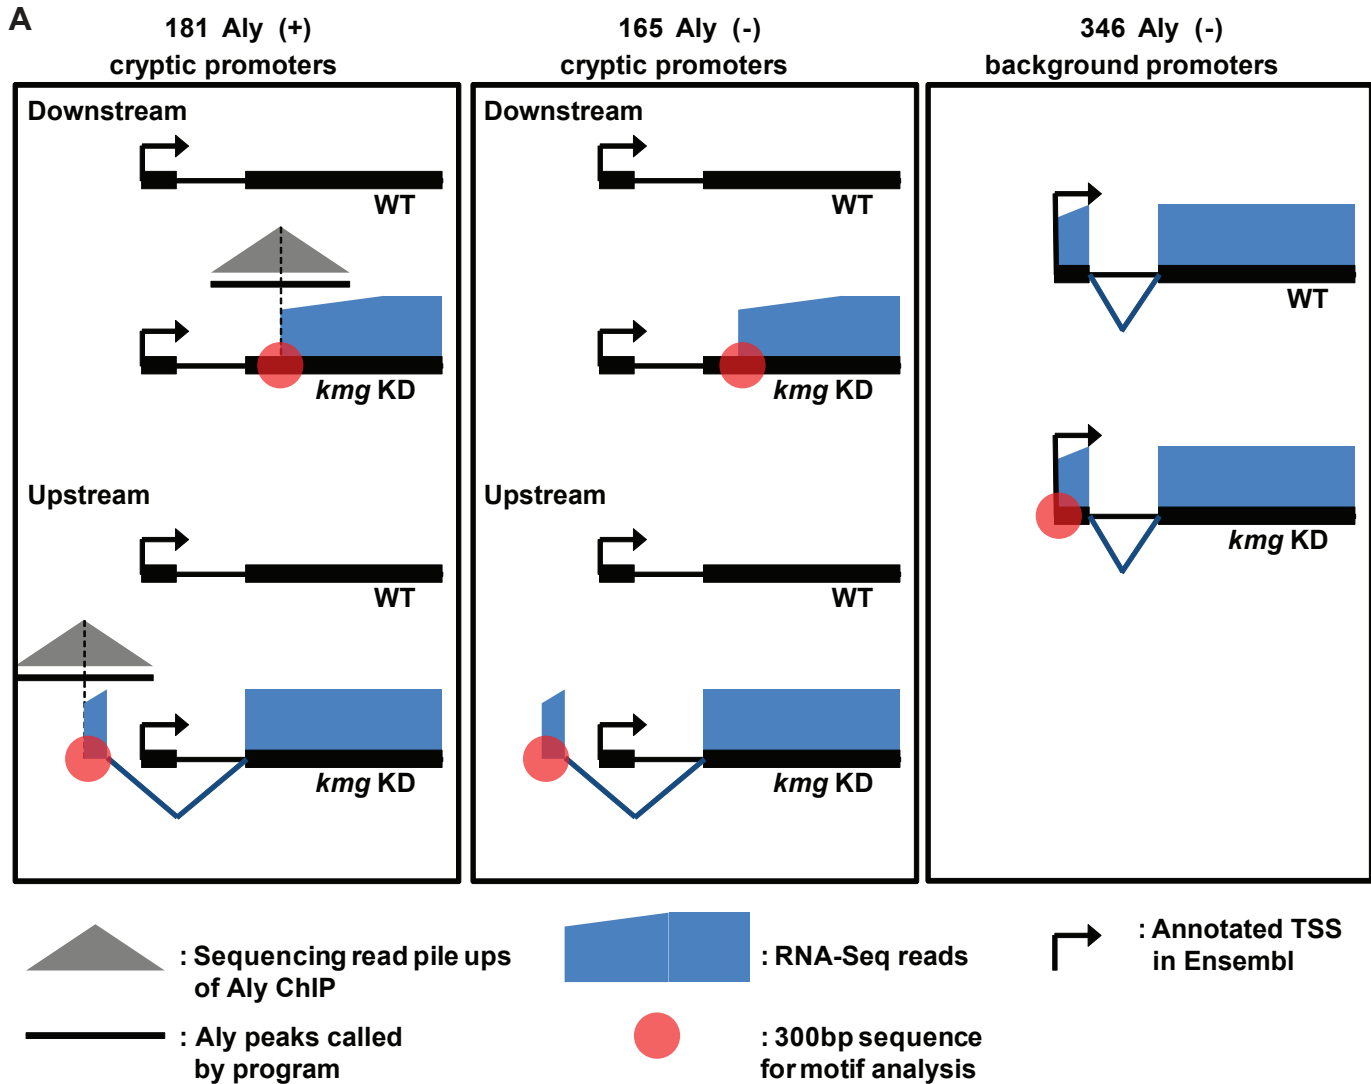

**B**

|  | E-value               | Primary sequence              | Control sequence                 | # of 181 Aly(+) cryptic promoters with motif | # of 165 Aly(-) cryptic promoters with motif | # of 346 Aly(-) background promoters with motif |
|--|-----------------------|-------------------------------|----------------------------------|----------------------------------------------|----------------------------------------------|-------------------------------------------------|
|  | $1.2 \times 10^{-25}$ | 181 Aly (+) cryptic promoters | 346 Aly (-) background promoters | 116/181                                      | 32/165                                       | 19/346                                          |
|  | > 0.05                | 165 Aly (-) cryptic promoters | 346 Aly (-) background promoters | 27/181                                       | 53/165                                       | 40/346                                          |



**Fig. S11 AGYWGGC motif at cryptic promoters bound by Aly in *kmg* KD testes**

(A) Schematic representation of classes of genes used for motif analyses. “181 Aly (+) cryptic promoters” include a set of 181 DNA sequences centered at the location of the TSSs at cryptic promoters that coincide with peaks of enrichment by CHIP for Aly in *kmg* KD testes defined in Fig. 4. “165 Aly (-) cryptic promoters” include a set of 165 DNA sequences centered at the location of the TSSs at cryptic promoters where no enrichment was detected after CHIP for Aly from *kmg* KD testes. “346 Aly (-) background promoters” include a set of 346 DNA sequences that centered at the location of the TSSs of genes that are expressed in wild-type testes but did not coincide with Aly peaks at the TSS. In addition, the ‘background’ genes were located in close proximity to the 346 cryptic promoters analyzed in the first two classes to reduce potential bias based on chromosomal location. All promoter DNA sequences were 300bps centered at TSSs. Genomic coordinates for TSS positions are listed in the table S6.

(B) Position weight matrix representation of sequence motifs identified by discriminative motif search with MEME (53) using “181 Aly (+) cryptic promoters” and, separately, “165 Aly (-) cryptic promoters” as primary sequences and the “346 Aly (-) background promoters” as control sequences. The number of motifs present was identified by FIMO (54) using a *p* value cut off 0.0001.

**Figure S12. Somatic misexpression is dependent on Aly function**

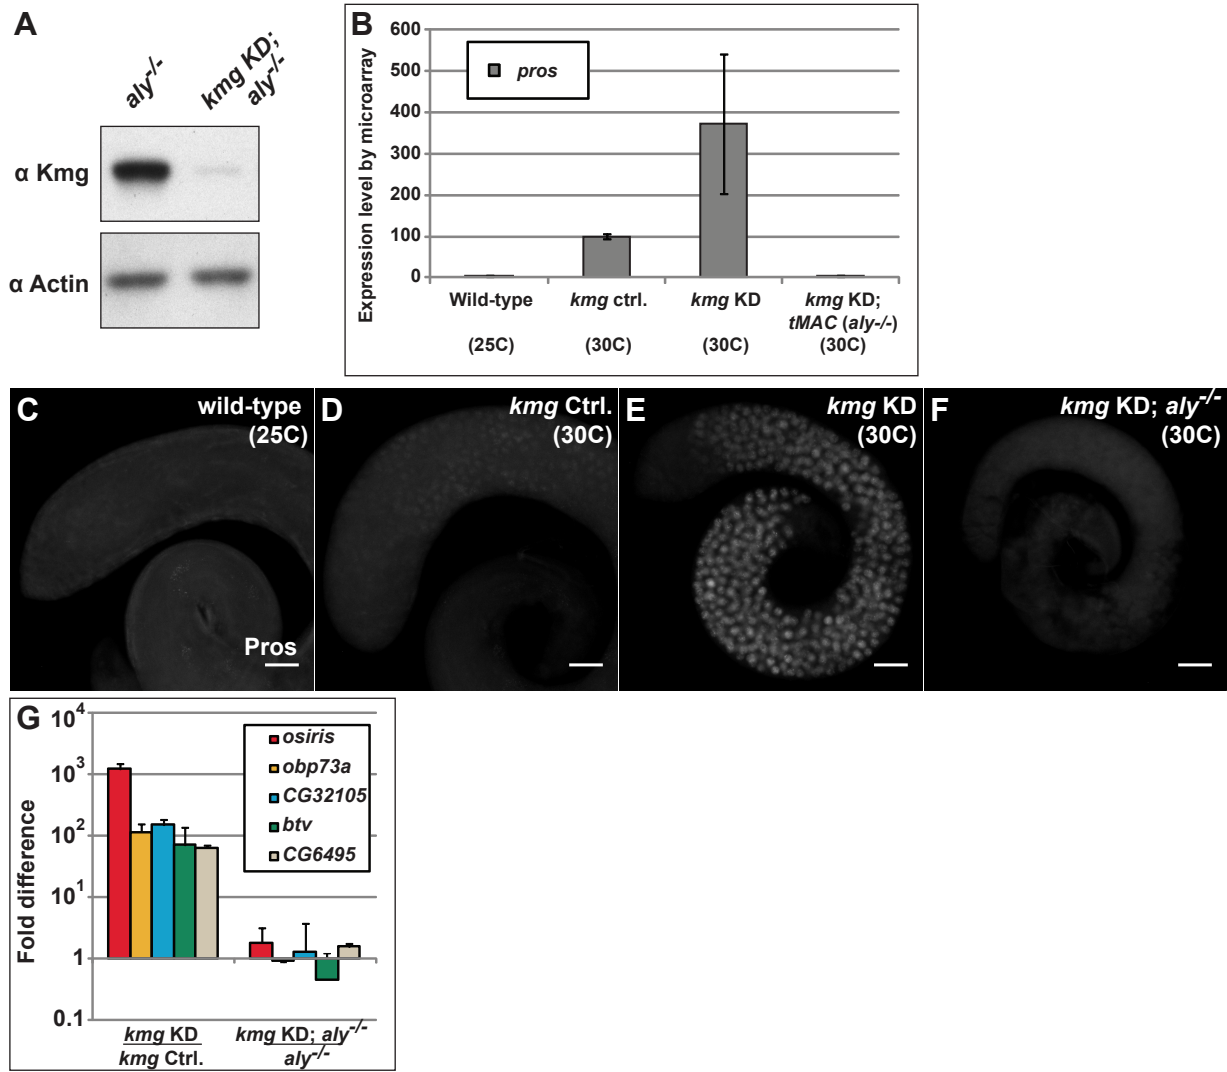

**Fig. S12 Somatic misexpression is dependent on Aly function**

(A) Western blot of Kmg protein in testis lysates from *aly*<sup>-/-</sup> mutant and *kmg* KD; *aly*<sup>-/-</sup> mutant flies.

(B) Expression levels of *pros* mRNA by microarray in wild-type (25°C), *kmg* sibling control (no Gal4 driver) (30°C), *kmg* KD (30°C), or *kmg* KD; *aly*<sup>-/-</sup> (30°C) testes.

(C-F) Immunofluorescence images of Pros in testes from (C) wild-type (25°C), (D) *kmg* sibling control (no Gal4 driver) (30°C), (E) *kmg* KD (30°C) or (F) *kmg* KD; *aly*<sup>-/-</sup> (30°C) flies.

(G) qRT-PCR measurements of the levels of 5 transcripts upregulated in *kmg* KD based on microarray. Expression in *kmg* KD and *kmg* KD; *aly*<sup>-/-</sup> testes compared to respective controls wild-type for Kmg function. Error bars represent standard deviation (n = 3).

Scale bars: 100µm in C- F.

**Figure S13. Germ cells in *kmg* KD; *aly*<sup>-/-</sup> differentiate to reach a stage equivalent to the stage of the germ cells in *kmg* KD**

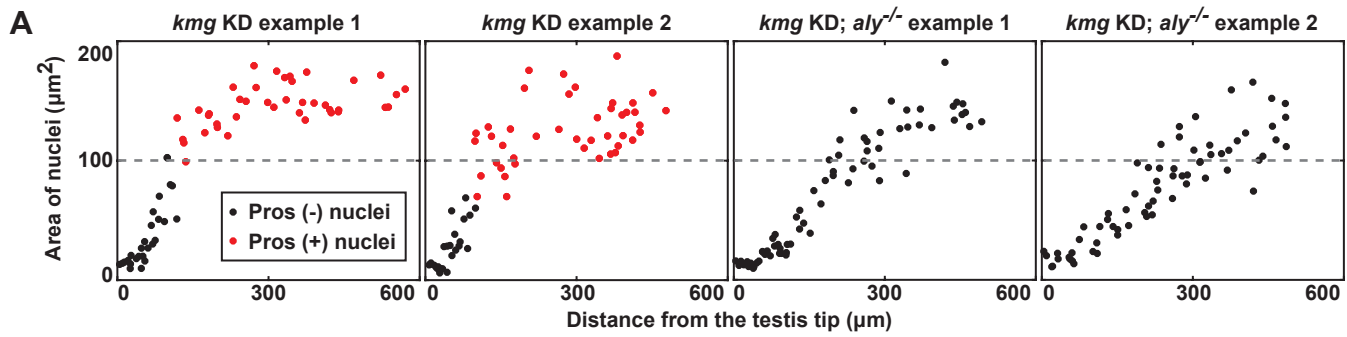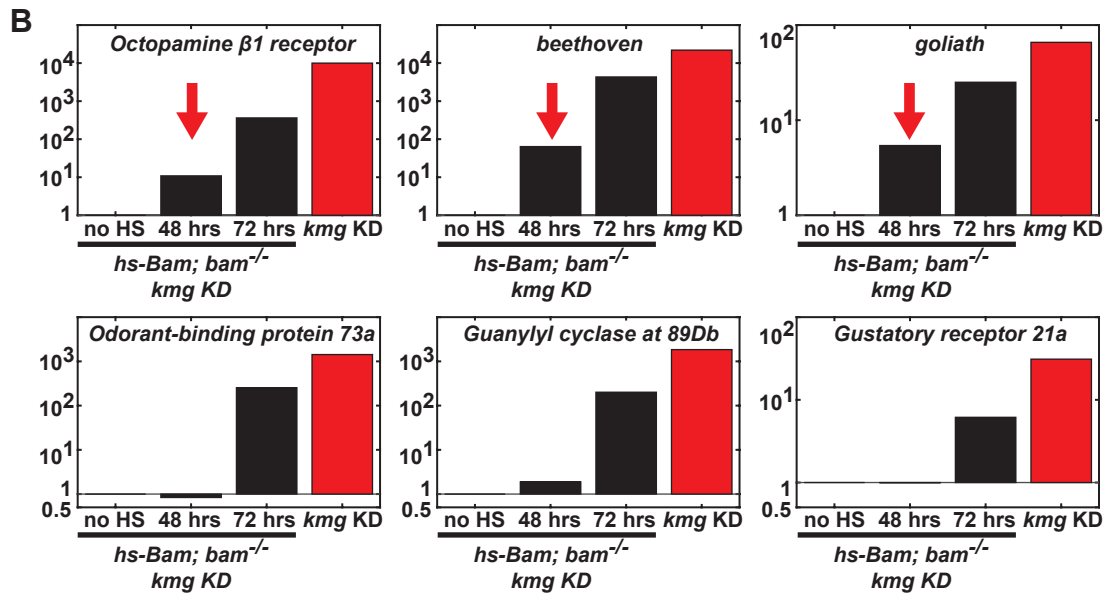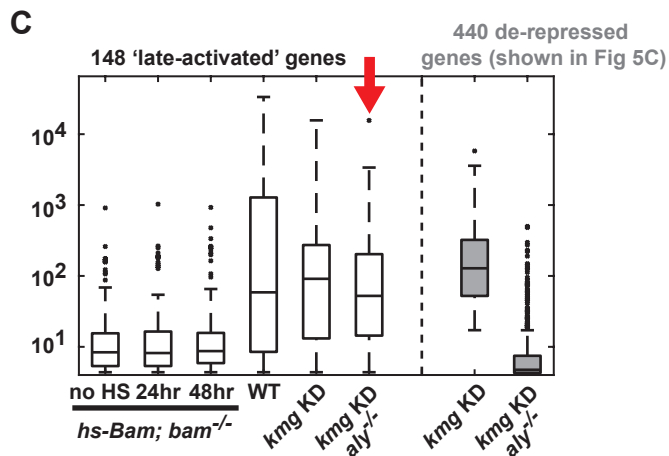

**Fig. S13 Germ cells in *kmg* KD; *aly*<sup>-/-</sup> differentiate to reach a stage equivalent to the stage of the germ cells in *kmg* KD**

(A) Scatter plot of the size of nuclei compared to distance from the testis tip of germ cells in *kmg* KD or *kmg* KD; *aly*<sup>-/-</sup> testes. (Black dots) Pros negative and (Red dots) Pros positive nuclei.

(B) qRT-PCR measurements of levels of six transcripts upregulated in *kmg* KD testes based on as germ cells progress through the *in vivo* differentiation protocol. Expression levels in (Black) *hs-Bam*; *kmg* KD; *bam*<sup>-/-</sup> (no heat shock, 48 hours and 72 hours post heat shock) and in (Red) *kmg* KD testes were compared by setting the expression level in *hs-Bam*; *kmg* KD; *bam*<sup>-/-</sup> testes without heat shock as 1.

(C) Box plot of expression of (white boxes) 148 late-activated genes in *hs-Bam*; *kmg* KD; *bam*<sup>-/-</sup> (no heat shock, 48 hours and 72 hours post heat shock), wild-type, *kmg* KD and *kmg* KD; *aly*<sup>-/-</sup> testes and (gray boxes) 440 de-repressed genes in *kmg* KD and *kmg* KD; *aly*<sup>-/-</sup> testes. (whiskers) the most extreme data points excluding outliers.

# Figure S14. Replicate for Aly ChIP-Seq and RNA-Seq expression of different classes of Aly bound genes

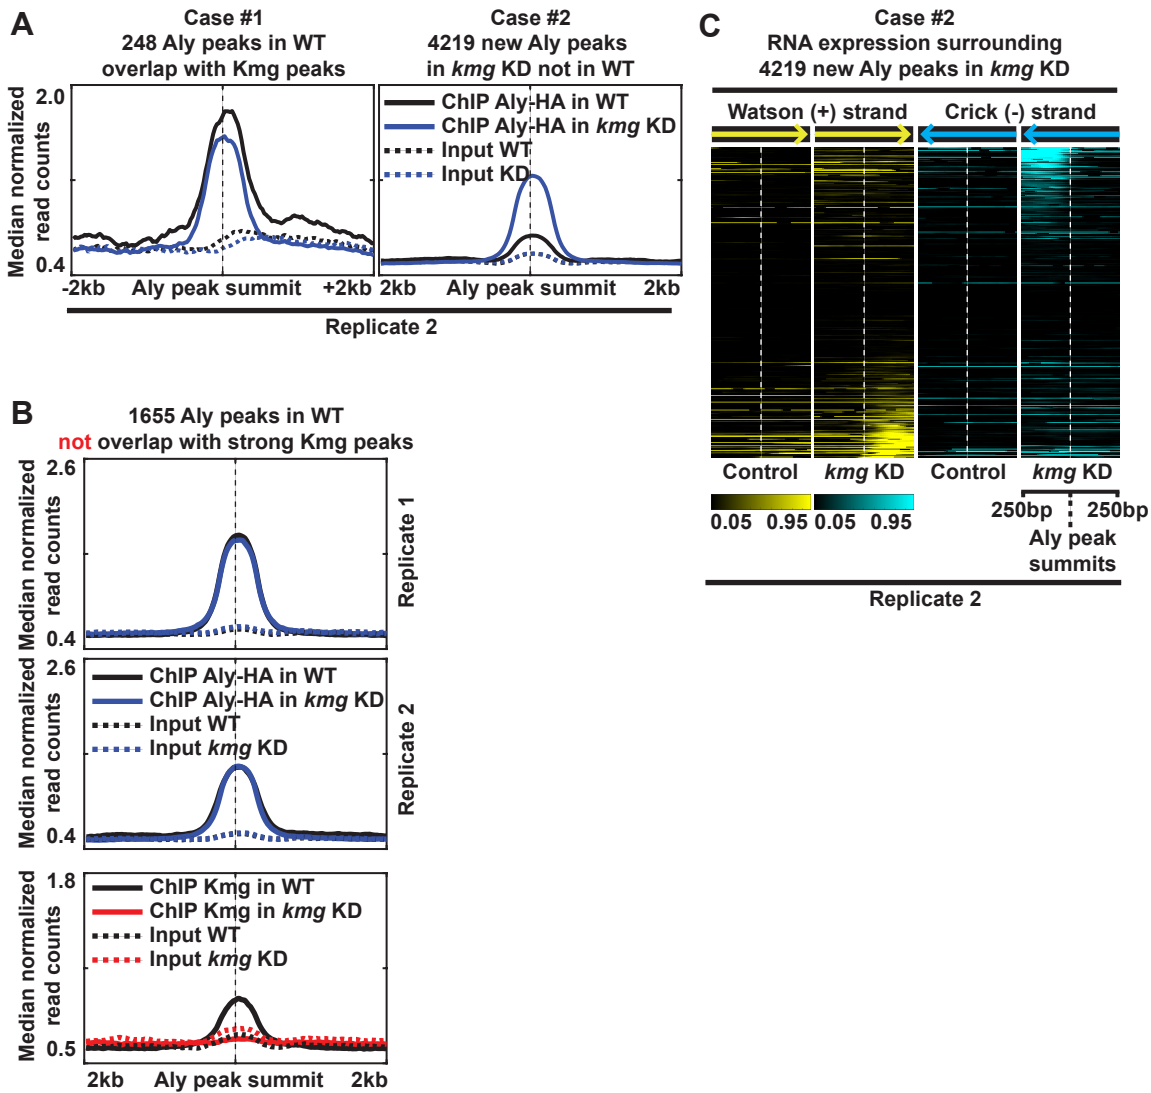

**Fig. S14 Replicate for Aly ChIP-Seq and RNA-Seq expression of different classes of Aly bound genes**

(A) Data from an independent replicate showing median profile of Aly ChIP (solid lines) and corresponding input (dotted lines) signals centered at (Case #1, left) 248 Aly peaks in wild-type that overlap with Kmg peaks and (Case #2, right) 4,219 new Aly peaks in *kmg* KD not detected in control testes. For the 248 Aly peaks in Case #1 - because these peaks were present at the promoters of genes with known strand information, read counts were plotted according to the direction of transcription from 5' to 3'.

(B) Median profile of reads from two replicate Aly and one representative Kmg ChIP (solid lines) and corresponding input (dotted lines), plotted centered at Aly peaks for 1,655 Aly peaks detected in wild-type testes that did not overlap with significant Kmg peaks.

(Note: Black and Blue solid lines coincide for the Aly ChIP data).

(C) Data from an independent replicate showing heatmap representation of normalized RNA-Seq read counts centered at 4,219 new Aly peaks that were not detected in wild-type testes but appeared in *kmg* KD testes (Case #2). The darkest color (black) represents the read count value at the 5th percentile and the brightest color (yellow for reads mapped to Watson (+) strand or cyan for reads mapped to Crick (-) strand) represents values at the 95th percentile among all values in *kmg* KD samples.

**Figure S15. Model of Kmg and dMi-2 blocking promiscuous activation at cryptic promoters by Aly**

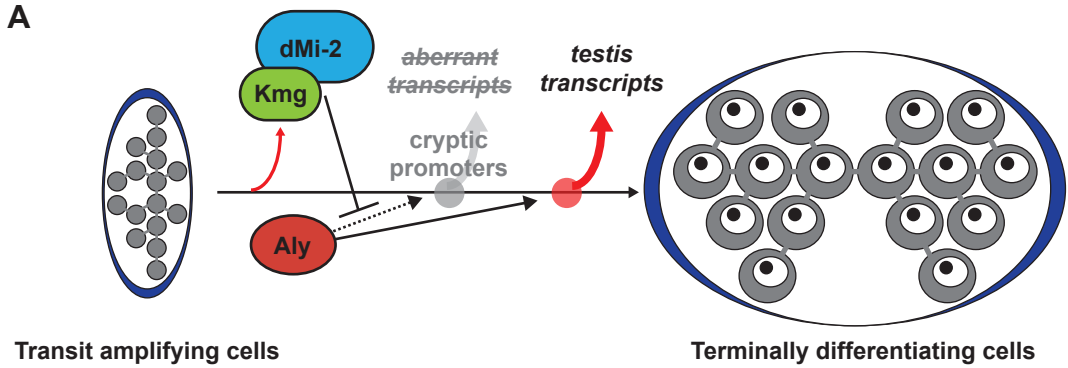



**Fig. S15 Model of Kmg and dMi-2 blocking promiscuous activation at cryptic promoters by Aly**

(A) Model for selective gene activation by Kmg and dMi-2.

**Table S4. List of chromatin regulators screened**

| <b>Gene symbol</b> | <b>VDRC ID</b> | <b>Phenotype</b>                                     |
|--------------------|----------------|------------------------------------------------------|
| Kdm4a              | 107868         | No noticeable defects                                |
| Kdm4b              | 110158         | No noticeable defects                                |
| CoRest             | 104900         | Differentiation defect (post meiotic cells observed) |
| Lsd-1              | 106147         | Differentiation defect (post meiotic cells observed) |
| Sin3A              | 105852         | No noticeable defects                                |
| HDAC1 (Rpd3)       | 46929          | No noticeable defects                                |
| esc                | 5690           | No noticeable defects                                |
| E(z)               | 107072         | No noticeable defects                                |
| Sce                | 106328         | No noticeable defects                                |
| Su(var)205 (HP1)   | 107477         | No noticeable defects                                |
| G9a                | 110662         | No noticeable defects                                |
| egg (SetDB1)       | 101677         | No noticeable defects                                |
| Su(var)3-9         | 101494         | Arrest of early spermatocytes                        |
| dMi-2              | 107204         | Spermatocyte arrest                                  |

\* Knock down was driven by bam-Gal4 driver as described in the materials and methods

**Additional Data table S1 (separate excel file)**

List of early differentiation genes upregulated at 24hours post heat shock expression of Bam

**Additional Data table S2 (separate excel file)**

List of 652 Aly-dependent spermatid differentiation genes

**Additional Data table S3 (separate excel file)**

List of 440 normally somatic genes that are misexpressed in *kmg* KD testes

**Additional Data table S5 (separate excel file)**

List of 680 Kmg bound genes and genomic locations of associated peaks

**Additional Data table S6 (separate excel file)**

List of 346 transcription start sites originated from cryptic promoters represented in Fig.4F

**Additional Data table S7 (separate excel file)**

List of genomic coordinates for Aly binding sites (peaks) based on different categories specified in Fig. 6B and fig. S14 (Case #1 and Case #2)

**Additional Data table S8 (separate excel file)**

List of 148 'late-activated' genes represented in fig. S13C

Additional Data table S1 (separate excel file) List of early differentiation genes upregulated at 24hours post heat shock expression of Bam

\* Transcripts that were upregulated in 24hours post heat shock expression of Bam in hs-bam; bam-/- mutant testes but not in 'no hs-bam transgene' control

\*Data were background adjusted and normalized using R program (v3.0.2) with the BioConductor package GCRMA. All values are log2 transformed. (Questions: Jongmin Kim / devtxn@gmail.com)

- 1 bam[-/-]\_noHS
- 2 bam[-/-]\_24hrPHS
- 3 hsBam;bam[-/-]\_noHS\_rep1
- 4 hsBam;bam[-/-]\_noHS\_rep2
- 5 hsBam;bam[-/-]\_24hrPHS\_rep1
- 6 hsBam;bam[-/-]\_24hrPHS\_rep2
- 7 hsBam;bam[-/-]\_noHS\_average
- 8 hsBam;bam[-/-]\_24hrPHS\_average

| Probeset_ID_Affym | Gene Title                       | Gene Symbol   | 1        | 2        | 3        | 4        | 5        | 6        | 7        | 8        | Fold     | Ctrl_Fold | Statistics |
|-------------------|----------------------------------|---------------|----------|----------|----------|----------|----------|----------|----------|----------|----------|-----------|------------|
| 1640229_at        | wurstfest                        | Fest (CG9975) | 2.18625  | 2.18625  | 2.18625  | 2.18625  | 9.580355 | 8.258077 | 2.18625  | 8.919216 | 6.732966 | -8.4E-10  | 0.009505   |
| 1637121_at        | Testis specific RRM protein      | Rbp4          | 3.395416 | 4.001944 | 3.07508  | 3.07508  | 10.38707 | 9.095902 | 3.07508  | 9.741488 | 6.666408 | 0.606529  | 0.009248   |
| 1629532_at        | ---                              | CG18157       | 2.185906 | 2.186094 | 2.186199 | 2.186094 | 9.253741 | 7.384333 | 2.186146 | 8.319037 | 6.13289  | 0.000188  | 0.022449   |
| 1623784_at        | CG5732                           | Gld2          | 5.691277 | 5.466428 | 5.308598 | 5.035598 | 10.81042 | 10.16814 | 5.172098 | 10.48928 | 5.317183 | -0.22485  | 0.004279   |
| 1628133_at        | kumgang                          | kmg (CG5204)  | 2.192001 | 2.185773 | 2.212269 | 2.198553 | 8.071082 | 6.821052 | 2.205411 | 7.446067 | 5.240656 | -0.00623  | 0.013929   |
| 1630834_at        | Stromalin-2                      | SA-2          | 5.140898 | 5.709339 | 5.158181 | 5.307385 | 9.586513 | 9.221841 | 5.232783 | 9.404177 | 4.171393 | 0.568441  | 0.002223   |
| 1628745_at        | ---                              | CG18313       | 7.093797 | 7.583147 | 7.246872 | 7.515402 | 11.30116 | 9.95714  | 7.381137 | 10.62915 | 3.248012 | 0.48935   | 0.041748   |
| 1626152_at        | Ror                              | Ror           | 3.821514 | 3.789631 | 3.739478 | 2.997692 | 6.548214 | 6.660879 | 3.368585 | 6.604547 | 3.235961 | -0.03188  | 0.013175   |
| 1634559_at        | ---                              | CG7213        | 2.187999 | 2.187999 | 2.187999 | 2.186886 | 5.413912 | 4.708485 | 2.187443 | 5.061198 | 2.873756 | 0         | 0.014732   |
| 1634343_at        | ---                              | Rpt6R         | 4.932722 | 5.117017 | 4.583462 | 4.475763 | 7.547373 | 6.730623 | 4.529612 | 7.138998 | 2.609386 | 0.184295  | 0.024025   |
| 1637654_at        | ---                              | CG10566       | 6.163982 | 6.090938 | 6.881646 | 6.101289 | 9.203502 | 8.539348 | 6.491467 | 8.871425 | 2.379958 | -0.07304  | 0.043355   |
| 1634125_at        | ---                              | CG30440       | 2.686935 | 2.87673  | 2.854122 | 2.796047 | 4.855959 | 4.844859 | 2.825084 | 4.850409 | 2.025324 | 0.189795  | 0.000213   |
| 1639781_at        | ---                              | CG13402       | 3.142273 | 3.26372  | 5.958622 | 6.103223 | 8.24254  | 7.82993  | 6.030923 | 8.036235 | 2.005312 | 0.121447  | 0.011676   |
| 1638469_s_at      | ---                              | CG3857        | 3.661793 | 3.74662  | 4.586525 | 3.736063 | 6.263576 | 6.065883 | 4.161294 | 6.164729 | 2.003435 | 0.084826  | 0.04435    |
| 1630124_at        | ---                              | CG5514        | 5.87034  | 6.306388 | 6.548535 | 6.654589 | 8.281618 | 8.57439  | 6.601562 | 8.428004 | 1.826442 | 0.436048  | 0.007188   |
| 1633135_s_at      | ---                              | CR18854       | 10.71728 | 10.61202 | 10.66197 | 10.20881 | 12.56129 | 11.87718 | 10.43539 | 12.21923 | 1.783846 | -0.10526  | 0.049043   |
| 1625005_s_at      | Adenine nucleotide translocase 2 | Ant2          | 10.05562 | 10.21119 | 9.155269 | 9.80314  | 11.48865 | 11.02282 | 9.479204 | 11.25573 | 1.776529 | 0.15557   | 0.046917   |
| 1632683_s_at      | gag-int-pol                      | copaGIP       | 11.98935 | 12.77851 | 11.69823 | 12.21175 | 13.33952 | 13.86503 | 11.95499 | 13.60228 | 1.647283 | 0.789157  | 0.046311   |
| 1633566_at        | ---                              | CG7694        | 7.036138 | 7.069233 | 6.565311 | 5.959411 | 7.847175 | 7.709841 | 6.262361 | 7.778508 | 1.516147 | 0.033094  | 0.039507   |
| 1640945_at        | longitudinals lacking            | lola          | 7.593963 | 7.636421 | 7.433754 | 7.070622 | 8.733726 | 8.577154 | 7.252188 | 8.65544  | 1.403252 | 0.042458  | 0.019282   |
| 1631146_at        | alphabet                         | alph          | 6.929422 | 6.538651 | 7.512792 | 7.133195 | 8.745129 | 8.692347 | 7.322994 | 8.718738 | 1.395745 | -0.39077  | 0.018332   |
| 1625749_at        | ---                              | CG14937       | 5.19819  | 5.140449 | 4.947168 | 5.036768 | 6.51202  | 6.249397 | 4.991968 | 6.380709 | 1.388741 | -0.05774  | 0.009834   |
| 1627649_at        | Meltrin-like                     | Neu3          | 4.824477 | 5.088733 | 5.060448 | 5.166964 | 6.463228 | 6.192026 | 5.113706 | 6.327627 | 1.213921 | 0.264255  | 0.014099   |
| 1631309_at        | ---                              | CG7280        | 6.192013 | 6.582864 | 5.964484 | 5.572702 | 7.00254  | 6.710937 | 5.768593 | 6.856738 | 1.088146 | 0.390851  | 0.046851   |
| 1629981_at        | lamin C                          | LamC          | 9.267005 | 9.618964 | 9.042937 | 8.962578 | 10.16112 | 9.972852 | 9.002757 | 10.06698 | 1.064227 | 0.351959  | 0.009123   |
| 1625569_at        | ---                              | CG7565        | 4.478482 | 4.875171 | 4.729671 | 4.618412 | 5.667539 | 5.744034 | 4.674042 | 5.705787 | 1.031745 | 0.396689  | 0.004254   |
| 1632855_at        | ---                              | CG7352        | 6.342008 | 6.224471 | 6.273802 | 5.873788 | 7.185008 | 7.003893 | 6.073795 | 7.09445  | 1.020656 | -0.11754  | 0.04329    |





















Additional Data table S3 (separate excel file) List of 440 normally somatic genes that are misexpressed in kmg KD testes

\* 440 transcripts that were specifically upregulated in kumgang KD compared to control (no Gal4 driver) testes

\*Data were background adjusted and normalized using R program (v3.0.2) with the BioConductor package GCRMA.

Samples in the following data were normalized together with bam-/-, aly-/-, sa-/-, wild-type data from GSE28728. All values are log2 transformed.

(Questions: Jongmin Kim / devtxn@gmail.com)

- 1 kmg\_Ctrl1
- 2 kmg\_Ctrl2
- 3 kmg\_KD1
- 4 kmg\_KD2
- 5 kmg\_KD\_aly1
- 6 kmg\_KD\_aly2
- 7 dMi2\_Ctrl1
- 8 dMi2\_Ctrl2
- 9 dMi2\_KD1
- 10 dMi2\_KD2

| Probeset_ID_Affy | Gene Title                       | Gene Symbol     | 1        | 2        | 3        | 4        | 5        | 6        | 7        | 8        | 9        | 10       |
|------------------|----------------------------------|-----------------|----------|----------|----------|----------|----------|----------|----------|----------|----------|----------|
| 1638261_at       | Osiris                           | Osi22           | 2.094744 | 2.094744 | 12.49595 | 12.43105 | 2.094744 | 2.094744 | 2.094744 | 2.094744 | 10.67451 | 10.25222 |
| 1630210_at       | ---                              | CG13027         | 2.174024 | 2.169412 | 11.61154 | 11.91536 | 2.129902 | 2.130545 | 2.129631 | 2.129902 | 9.878833 | 8.858814 |
| 1624528_at       | Guanylyl cyclase at 89Db         | Gyc-89Db        | 2.214337 | 2.152517 | 11.05808 | 11.42797 | 6.847564 | 5.866968 | 2.209103 | 2.517948 | 9.138549 | 8.420059 |
| 1626243_at       | ---                              | CG11626         | 2.338449 | 2.282205 | 11.36126 | 11.37162 | 5.035243 | 4.370503 | 2.353419 | 2.338449 | 5.405932 | 5.056324 |
| 1638335_at       | ---                              | CG18493         | 2.170815 | 2.10314  | 11.17844 | 11.10497 | 2.100917 | 2.100917 | 2.337011 | 2.10314  | 5.980875 | 5.06424  |
| 1638967_at       | ---                              | ---             | 2.225336 | 2.225336 | 11.37727 | 10.91184 | 2.225336 | 2.181834 | 2.225336 | 2.222933 | 7.20216  | 6.348586 |
| 1634005_at       | ---                              | CG7906          | 2.094744 | 2.094744 | 10.97532 | 10.61324 | 2.094744 | 2.094744 | 2.094744 | 2.295935 | 7.896059 | 6.902331 |
| 1635937_at       | --- /// ---                      | CG4500 /// Dsec | 2.094744 | 2.094744 | 11.02051 | 10.32873 | 2.094744 | 2.094744 | 2.094744 | 2.094744 | 4.967615 | 4.503096 |
| 1632215_at       | ---                              | CG6296          | 2.094744 | 2.094744 | 10.81125 | 10.37465 | 2.094744 | 2.094744 | 2.094744 | 2.094744 | 6.932155 | 5.755239 |
| 1630831_at       | ---                              | CG7695          | 2.096138 | 2.096138 | 10.43627 | 10.41061 | 2.096138 | 2.161749 | 2.096138 | 2.096138 | 2.994705 | 3.004045 |
| 1637660_at       | ---                              | CG5150          | 2.094744 | 2.094744 | 10.76771 | 9.940625 | 2.523838 | 2.094744 | 2.169869 | 3.164808 | 9.177873 | 8.868827 |
| 1624259_at       | ---                              | CG32040         | 2.102129 | 2.096602 | 10.31892 | 10.12371 | 4.07592  | 2.646645 | 2.102129 | 2.117699 | 8.848435 | 8.358433 |
| 1631611_at       | CG33983                          | obst-H          | 2.094744 | 2.094744 | 10.35314 | 9.804401 | 2.094744 | 2.094744 | 2.223404 | 2.17667  | 4.202425 | 3.826059 |
| 1625216_at       | ---                              | CG13724         | 2.13439  | 2.094744 | 10.01378 | 10.10771 | 2.094744 | 2.094744 | 2.094744 | 2.094744 | 5.39912  | 4.1133   |
| 1629761_at       | --- /// ---                      | CG17780 /// CG  | 2.455561 | 2.563891 | 10.52681 | 10.32194 | 3.595825 | 3.439371 | 2.747424 | 2.455561 | 8.753031 | 7.696187 |
| 1624914_at       | ---                              | CG8690          | 2.094744 | 2.094744 | 10.42357 | 9.530886 | 2.111341 | 2.094744 | 2.801197 | 2.094744 | 6.895717 | 5.946539 |
| 1628296_at       | polypeptide GalNAc transferase 4 | pgant4          | 2.346944 | 2.456073 | 10.39901 | 10.1242  | 2.33838  | 2.410637 | 3.407016 | 2.456073 | 6.66579  | 5.799627 |
| 1628094_at       | ---                              | CG17639         | 2.094744 | 2.094744 | 9.85415  | 10.00664 | 2.094744 | 2.094744 | 2.094744 | 2.094744 | 6.539587 | 5.353942 |
| 1623971_at       | ---                              | CG9150          | 2.513262 | 2.39621  | 10.56035 | 9.850616 | 4.12645  | 3.034356 | 2.541639 | 2.596756 | 9.687217 | 9.220441 |
| 1637403_at       | ---                              | CG7953          | 2.216327 | 2.240892 | 9.925633 | 9.995674 | 2.141487 | 2.172419 | 2.172419 | 2.177299 | 2.520541 | 2.34613  |
| 1623396_at       | ---                              | CG13875         | 2.14474  | 2.14474  | 10.01359 | 9.582122 | 3.252785 | 3.119359 | 2.135309 | 2.14474  | 8.028679 | 7.153959 |
| 1638775_at       | Multi drug resistance 50         | Mdr50           | 2.33577  | 2.424432 | 9.912347 | 10.02058 | 2.357976 | 2.33577  | 2.33577  | 2.33577  | 4.695617 | 3.393004 |
| 1639559_at       | ---                              | CG6431          | 2.094744 | 2.094744 | 9.790586 | 9.515344 | 2.439256 | 2.094744 | 2.094744 | 2.094744 | 7.983641 | 7.168417 |
| 1640990_at       | ---                              | CG13998         | 2.094744 | 2.106591 | 9.906043 | 9.378509 | 2.094744 | 2.094744 | 2.094744 | 2.094744 | 6.052677 | 3.914609 |

|              |                                  |                 |          |          |          |          |          |          |          |          |          |          |
|--------------|----------------------------------|-----------------|----------|----------|----------|----------|----------|----------|----------|----------|----------|----------|
| 1639636_at   | CG1869                           | Cht7            | 2.30633  | 2.300928 | 9.518618 | 10.1322  | 4.912617 | 4.309863 | 2.30633  | 2.310081 | 10.9025  | 10.1638  |
| 1636249_at   | 7B2                              | 7B2             | 2.438234 | 2.705277 | 10.06782 | 10.09572 | 3.301092 | 2.521641 | 2.418686 | 2.479852 | 10.07793 | 9.762089 |
| 1622900_at   | Gustatory receptor 59d           | Gr59d           | 2.117918 | 2.117918 | 9.406127 | 9.835242 | 2.117918 | 2.117918 | 2.117918 | 2.117918 | 5.722694 | 5.866098 |
| 1626859_at   | ---                              | CG32374         | 2.094744 | 2.094744 | 9.444065 | 9.535612 | 2.094744 | 2.094744 | 2.094744 | 2.094744 | 5.268691 | 5.080897 |
| 1627288_a_at | ---                              | ---             | 2.440309 | 2.333287 | 9.806025 | 9.748638 | 2.399883 | 2.333287 | 2.455698 | 2.434132 | 5.089591 | 4.973507 |
| 1639190_at   | masquerade                       | mas             | 2.888057 | 2.908957 | 10.42267 | 10.11632 | 3.757282 | 2.965012 | 2.866832 | 2.775632 | 4.803554 | 3.291355 |
| 1635488_at   | poor gastrulation                | pog             | 2.162943 | 2.162943 | 9.661323 | 9.314451 | 2.181635 | 2.162943 | 2.198338 | 2.162943 | 5.418375 | 2.739203 |
| 1632566_at   | ---                              | CG11318         | 2.094744 | 2.094744 | 9.085713 | 9.672544 | 2.094744 | 2.094744 | 2.094744 | 2.094744 | 5.766257 | 5.657469 |
| 1626341_at   | CG14122                          | Smyd4           | 3.509971 | 3.274552 | 10.9419  | 10.4095  | 8.438308 | 7.416012 | 3.082826 | 3.210193 | 8.098948 | 7.367011 |
| 1633123_at   | ---                              | CG7201          | 2.094902 | 2.094744 | 9.471304 | 9.202748 | 3.793907 | 2.117753 | 2.094744 | 2.103231 | 7.711035 | 6.834619 |
| 1635467_a_at | ---                              | CG7381          | 2.338828 | 2.100946 | 9.215081 | 9.623597 | 3.607386 | 3.592998 | 2.110111 | 2.126774 | 5.886483 | 4.83544  |
| 1629425_at   | ---                              | CG13157         | 2.094744 | 2.094744 | 9.295206 | 9.288008 | 2.094744 | 2.094744 | 2.094744 | 2.094744 | 6.262162 | 5.282334 |
| 1633900_at   | ---                              | CG14044         | 2.109866 | 2.09737  | 9.546218 | 8.960886 | 4.041652 | 2.249114 | 2.09737  | 2.09737  | 6.602277 | 5.554365 |
| 1632299_at   | alphaPS4                         | alphaPS4        | 2.296778 | 2.513946 | 9.532976 | 9.52495  | 7.193548 | 7.096359 | 2.312942 | 2.435544 | 7.567889 | 6.990795 |
| 1630915_at   | ---                              | ---             | 2.094744 | 2.094744 | 9.227403 | 9.153752 | 2.094744 | 2.094744 | 2.094744 | 2.148653 | 2.876979 | 2.150443 |
| 1638319_at   | inactivation no afterpotential D | inaD            | 2.094744 | 2.094744 | 9.237066 | 9.141427 | 2.094744 | 2.094744 | 2.094744 | 2.094744 | 6.402143 | 4.454074 |
| 1640983_at   | ---                              | CG5909          | 2.110529 | 2.110529 | 9.389951 | 8.988484 | 2.211977 | 2.110529 | 2.110529 | 2.124081 | 2.094744 | 2.101752 |
| 1626959_at   | Odorant-binding protein 58b      | Obp58b          | 2.101954 | 2.094744 | 9.594538 | 8.739113 | 7.553783 | 6.546812 | 2.291807 | 2.262435 | 7.004165 | 6.067739 |
| 1627600_at   | ---                              | CG4770          | 2.176035 | 2.151765 | 9.335856 | 9.073212 | 2.585501 | 3.73857  | 2.229458 | 2.216492 | 6.971294 | 6.019116 |
| 1624829_at   | ---                              | CG33288         | 2.204581 | 2.241192 | 9.262692 | 9.214789 | 2.645639 | 2.323435 | 2.204581 | 2.204581 | 8.269154 | 7.286706 |
| 1625737_at   | ---                              | CG12133         | 3.200372 | 3.004938 | 10.1855  | 9.932448 | 2.990586 | 2.873494 | 4.193443 | 4.433194 | 8.568029 | 7.940979 |
| 1626911_at   | ---                              | CG6495          | 2.191624 | 2.202809 | 9.159036 | 9.127896 | 2.916777 | 2.897859 | 2.311831 | 2.331237 | 8.757091 | 7.896756 |
| 1641605_at   | PIP82                            | PIP82           | 2.094744 | 2.094744 | 9.403833 | 8.652106 | 2.094744 | 2.094744 | 2.242127 | 2.35949  | 5.708006 | 4.653233 |
| 1624507_at   | ---                              | CG31268         | 2.094744 | 2.094744 | 9.25222  | 8.797182 | 2.094744 | 2.094744 | 2.094744 | 2.094744 | 6.175894 | 5.423257 |
| 1629394_at   | CG15007                          | Cpr64Ab         | 2.662351 | 2.743339 | 9.493553 | 9.720596 | 3.146927 | 2.963495 | 3.141655 | 3.02138  | 4.641281 | 4.048892 |
| 1629860_at   | --- /// ---                      | CG6462 /// Dsin | 2.094744 | 2.094744 | 8.927882 | 9.066607 | 2.094744 | 2.094744 | 2.094744 | 2.094744 | 4.366005 | 3.510155 |
| 1626937_s_at | trpgamma                         | trpgamma        | 2.2163   | 2.202075 | 9.243432 | 8.976192 | 2.2163   | 2.254496 | 2.244328 | 2.2163   | 8.735685 | 7.741084 |
| 1624428_at   | Eig71Ei                          | Eig71Ei         | 2.094744 | 2.094744 | 8.977476 | 8.977807 | 2.094744 | 2.094744 | 2.094744 | 2.094744 | 4.641291 | 4.44402  |
| 1634438_at   | Munster                          | Pph13           | 2.124584 | 2.123848 | 9.123436 | 8.872406 | 2.819595 | 2.124584 | 2.124584 | 2.124584 | 8.34877  | 7.268989 |
| 1624434_at   | tolloid                          | tld             | 2.122606 | 2.335775 | 8.907757 | 9.281681 | 2.602878 | 2.122606 | 2.122606 | 2.150974 | 7.393029 | 6.48375  |
| 1640809_at   | ---                              | CG12105         | 2.094744 | 2.094744 | 8.813442 | 9.097083 | 2.111527 | 2.094744 | 2.094744 | 2.094744 | 4.735564 | 4.525031 |
| 1641248_at   | beat-VI                          | beat-VI         | 2.094744 | 2.094744 | 8.677417 | 9.17356  | 2.173824 | 2.094744 | 2.094744 | 2.094744 | 6.027056 | 5.352148 |
| 1635406_at   | cGMP-dependent protein kinase    | Pkg21D          | 2.189776 | 2.189776 | 9.28327  | 8.665095 | 2.22525  | 2.189776 | 2.189776 | 2.189776 | 3.550898 | 2.191217 |
| 1640390_at   | ---                              | CG3649          | 2.094744 | 2.094744 | 8.910543 | 8.80549  | 2.094744 | 2.094744 | 2.094744 | 2.094744 | 6.505115 | 5.515153 |
| 1633591_at   | glide glide2                     | gcm2            | 2.364646 | 2.614094 | 8.641726 | 9.851414 | 2.188851 | 2.152274 | 2.669383 | 3.203276 | 7.015356 | 5.743852 |
| 1628611_at   | ---                              | CG11241         | 2.098617 | 2.106215 | 8.855738 | 8.842338 | 2.3927   | 2.307662 | 2.109463 | 2.098617 | 7.993186 | 7.231007 |
| 1624389_at   | ---                              | CG7526          | 2.104736 | 2.106133 | 8.577902 | 8.999909 | 6.552684 | 5.693932 | 2.094744 | 2.111859 | 7.444313 | 6.164812 |
| 1631097_at   | ---                              | CG15153         | 2.094744 | 2.094744 | 8.709448 | 8.813544 | 2.094744 | 2.094744 | 2.094744 | 2.094744 | 8.363594 | 7.590647 |
| 1639043_at   | CG11824                          | CG34350         | 2.111803 | 2.111803 | 8.651091 | 8.836237 | 2.111803 | 2.111803 | 2.111803 | 2.111803 | 7.035786 | 4.835488 |
| 1625645_at   | ---                              | CR31822         | 2.75267  | 3.011613 | 9.169568 | 9.836818 | 3.267724 | 3.486025 | 2.462187 | 2.512895 | 8.587155 | 7.829541 |
| 1628918_at   | ---                              | CG17478         | 2.681623 | 2.711804 | 9.73541  | 8.894696 | 2.909845 | 3.52615  | 3.055319 | 3.633079 | 9.233502 | 8.70786  |
| 1639469_a_at | GTP cyclohydrolase               | Pu              | 3.172527 | 3.538324 | 9.960129 | 9.98055  | 7.24837  | 6.772526 | 3.60669  | 3.999948 | 10.45586 | 9.823658 |
| 1630532_at   | ---                              | CG13091         | 3.314957 | 3.421258 | 10.15369 | 9.807406 | 4.099698 | 3.507739 | 3.383197 | 3.480329 | 9.339776 | 9.123705 |

|              |                                  |                |          |          |          |          |          |          |          |          |          |          |
|--------------|----------------------------------|----------------|----------|----------|----------|----------|----------|----------|----------|----------|----------|----------|
| 1629846_at   | ---                              | CG11619        | 2.511423 | 2.531754 | 9.13348  | 9.125325 | 2.511423 | 2.119943 | 7.337624 | 6.859975 | 7.71351  | 6.837559 |
| 1624519_at   | guanine nucleotide regulatory pr | Gbeta76C       | 2.828534 | 2.792046 | 9.313501 | 9.520156 | 3.10834  | 3.31018  | 3.11487  | 3.269812 | 5.187296 | 4.439572 |
| 1636287_at   | --- /// --- /// --- /// GA1042   | CG10592 /// Da | 2.429175 | 2.233742 | 9.112705 | 8.712444 | 2.547555 | 2.429175 | 2.401791 | 2.463231 | 6.686762 | 5.376865 |
| 1627704_a_at | TNF Receptor Associated Factor 1 | Traf4          | 2.526394 | 2.187213 | 9.035341 | 8.760141 | 3.1601   | 3.531339 | 2.447373 | 2.441112 | 5.486679 | 5.179232 |
| 1628411_at   | ---                              | ---            | 2.545959 | 2.413727 | 9.235704 | 8.783827 | 3.230816 | 2.521988 | 2.328537 | 2.328537 | 5.459282 | 4.405797 |
| 1627413_at   | CG14365                          | CG34383        | 2.288352 | 2.309527 | 8.259863 | 9.372077 | 2.288352 | 2.568868 | 2.279541 | 2.288352 | 3.181378 | 2.480834 |
| 1632461_at   | ---                              | CG31233        | 2.195461 | 2.195461 | 8.839822 | 8.577582 | 2.16274  | 2.191974 | 2.195461 | 2.195461 | 3.210731 | 2.609585 |
| 1635885_s_at | ---                              | ---            | 2.251167 | 2.244422 | 8.755767 | 8.75937  | 5.866448 | 5.373718 | 2.277687 | 2.201513 | 8.739131 | 8.50105  |
| 1635505_a_at | CG17274                          | Ir93a          | 2.182524 | 2.200971 | 8.811456 | 8.580036 | 2.204641 | 2.177588 | 2.22617  | 2.204641 | 5.853348 | 4.785841 |
| 1641146_at   | scarlet                          | st             | 2.715848 | 2.747278 | 9.412499 | 9.042389 | 5.35303  | 5.30792  | 2.71235  | 2.765401 | 9.021584 | 8.668135 |
| 1625245_at   | laccase-like                     | CG3759         | 2.152291 | 2.197562 | 8.712627 | 8.590316 | 3.144081 | 2.810722 | 2.189065 | 2.233978 | 7.881137 | 7.337477 |
| 1639401_at   | maltase                          | LvpH           | 2.094744 | 2.094744 | 8.936857 | 8.171074 | 2.094744 | 2.094744 | 3.084208 | 2.094744 | 3.455426 | 2.172036 |
| 1629491_at   | ---                              | CG13318        | 2.809341 | 2.769549 | 9.396456 | 9.091901 | 2.62351  | 2.094744 | 2.972939 | 2.880454 | 6.192785 | 5.319938 |
| 1629932_at   | yellow-d2                        | yellow-d2      | 2.094744 | 2.094744 | 8.649659 | 8.436929 | 2.094744 | 2.094744 | 2.094744 | 2.094744 | 5.114191 | 4.059002 |
| 1631100_at   | Drosokinin receptor              | Lkr            | 2.392038 | 2.430794 | 8.362257 | 9.341674 | 5.636286 | 5.611016 | 2.276119 | 2.435583 | 10.41633 | 9.944792 |
| 1630473_at   | CG5468                           | TwdIM          | 2.094744 | 2.094744 | 8.58044  | 8.477899 | 2.094744 | 2.095925 | 2.094744 | 2.094744 | 2.632885 | 3.977729 |
| 1626529_at   | CG12976                          | CG42337        | 2.118566 | 2.118566 | 8.534235 | 8.54047  | 2.118566 | 2.118566 | 2.118566 | 2.118566 | 5.519601 | 4.144752 |
| 1634991_at   | ---                              | CG8083         | 2.704772 | 2.94079  | 9.494832 | 8.948237 | 4.281954 | 5.503001 | 3.068447 | 2.968603 | 5.086502 | 5.007442 |
| 1637807_at   | protein kinase C                 | inaC           | 2.094744 | 2.094744 | 8.82731  | 8.152342 | 3.280204 | 2.99371  | 2.094744 | 2.094744 | 3.236116 | 3.206391 |
| 1639720_at   | CG6596                           | CG42269        | 2.094744 | 2.094744 | 8.342033 | 8.636806 | 2.094744 | 2.094744 | 2.094744 | 2.094744 | 6.118919 | 4.719736 |
| 1641643_at   | ---                              | CG33007        | 2.122923 | 2.126917 | 8.41856  | 8.565974 | 2.126917 | 2.231971 | 2.12492  | 2.137586 | 6.636511 | 5.586437 |
| 1630418_s_at | sarcomere length short           | sals           | 2.590369 | 2.587246 | 8.913279 | 8.944194 | 2.65404  | 2.655605 | 2.439903 | 2.418673 | 5.309742 | 4.25727  |
| 1631265_at   | ---                              | CG6280         | 2.094744 | 2.094744 | 7.902649 | 8.940536 | 2.094744 | 2.094744 | 2.094744 | 2.094744 | 5.935852 | 5.338134 |
| 1625228_at   | vesicular GABA transporter       | VGAT           | 2.094744 | 2.094744 | 8.654069 | 8.15965  | 2.094744 | 2.094744 | 2.094744 | 2.094744 | 2.339634 | 2.095288 |
| 1626098_at   | ---                              | CG11453        | 2.337105 | 2.296135 | 8.608203 | 8.621375 | 2.700148 | 3.058521 | 2.337105 | 2.337105 | 5.523368 | 4.559472 |
| 1637998_at   | CG12330                          | Cpr65Az        | 2.206099 | 2.209222 | 8.367175 | 8.528283 | 2.306028 | 2.306028 | 2.261999 | 2.256654 | 2.773126 | 2.289172 |
| 1623243_at   | ---                              | CG5656         | 2.365834 | 2.238454 | 8.43373  | 8.645063 | 2.443415 | 2.654333 | 2.300768 | 2.377363 | 8.723801 | 8.098084 |
| 1636460_at   | Jonah 65A                        | Jon65Ai        | 2.222504 | 2.224143 | 8.537792 | 8.366446 | 2.944596 | 2.513077 | 2.222504 | 2.223452 | 3.464576 | 3.227034 |
| 1641220_at   | prominin                         | prom           | 2.194926 | 2.194926 | 8.13863  | 8.704088 | 2.194926 | 2.194926 | 2.168559 | 2.194926 | 6.845862 | 6.140668 |
| 1635732_at   | ---                              | CG6915         | 2.128439 | 2.128439 | 8.402632 | 8.291799 | 2.128439 | 2.121354 | 2.128439 | 2.128439 | 7.79313  | 7.196396 |
| 1625203_at   | ---                              | CG9826         | 2.094744 | 2.094744 | 8.306707 | 8.317615 | 2.094744 | 2.094744 | 2.094744 | 2.094744 | 7.896385 | 7.062338 |
| 1622901_at   | ---                              | CG9993         | 2.329569 | 2.349831 | 8.597948 | 8.432163 | 2.369358 | 2.502051 | 2.363639 | 2.363639 | 6.532824 | 6.099062 |
| 1639254_at   | ---                              | CG32036        | 2.110285 | 2.110285 | 8.206669 | 8.338465 | 2.471585 | 2.549201 | 2.110285 | 2.125825 | 5.280734 | 5.021419 |
| 1625353_at   | Drosokinin receptor              | CG34127        | 2.126144 | 2.145661 | 8.705445 | 7.84885  | 2.266761 | 2.165177 | 2.165177 | 2.094744 | 5.653901 | 4.764221 |
| 1634928_at   | Ecdysone-inducible gene E2       | ImpE2          | 2.094744 | 2.094744 | 7.916396 | 8.537021 | 2.926386 | 2.641812 | 2.094744 | 2.094744 | 4.888511 | 3.487671 |
| 1625873_at   | ---                              | CG15661        | 2.153575 | 2.153575 | 8.512889 | 8.049123 | 2.171109 | 2.812235 | 2.153575 | 2.153575 | 6.607055 | 5.712265 |
| 1624671_at   | ---                              | CG17782        | 2.094744 | 2.094744 | 8.315634 | 8.015039 | 2.094744 | 2.094744 | 2.094744 | 2.094744 | 4.123679 | 3.974143 |
| 1637961_at   | zerknult                         | zen            | 2.728942 | 2.685117 | 9.029089 | 8.524166 | 4.574602 | 3.589193 | 2.736839 | 2.619234 | 7.190487 | 6.65456  |
| 1629639_at   | ---                              | CG14369        | 2.174651 | 2.135115 | 8.180941 | 8.153397 | 4.937969 | 3.112955 | 2.158472 | 2.199579 | 3.597552 | 2.690361 |
| 1636393_at   | ---                              | CG15005        | 2.094744 | 2.094744 | 8.349869 | 7.855925 | 2.094744 | 2.094744 | 2.094744 | 2.094744 | 2.197983 | 2.094744 |
| 1628454_at   | pickpocket 12                    | ppk12          | 2.094744 | 2.105557 | 8.44034  | 7.768193 | 2.174308 | 2.094744 | 2.094744 | 2.235387 | 3.092905 | 2.235389 |
| 1624106_at   | ---                              | CG3790         | 2.307548 | 2.307548 | 8.694519 | 7.903179 | 2.643322 | 2.636924 | 2.307044 | 2.307548 | 7.769776 | 6.716807 |
| 1626238_at   | ---                              | CG31690        | 2.989326 | 2.358478 | 8.915446 | 8.409614 | 5.012574 | 4.406685 | 2.929102 | 2.929102 | 4.972111 | 3.734348 |



|              |                                  |                |          |          |          |          |          |          |          |          |          |          |
|--------------|----------------------------------|----------------|----------|----------|----------|----------|----------|----------|----------|----------|----------|----------|
| 1630504_at   | ---                              | CG13830        | 2.098262 | 2.094744 | 7.992724 | 8.160615 | 4.603675 | 3.862074 | 2.098262 | 2.098262 | 6.261779 | 5.40803  |
| 1625657_at   | ---                              | CG32335        | 3.307583 | 3.307583 | 9.536402 | 8.938106 | 3.307583 | 3.24616  | 3.307583 | 3.307583 | 6.083838 | 6.04743  |
| 1636873_at   | ---                              | CG9068         | 2.094744 | 2.094744 | 7.9788   | 8.037553 | 2.094744 | 2.094744 | 2.094744 | 2.094744 | 7.140644 | 6.177881 |
| 1634821_at   | CG30468                          | Ir52c          | 2.320843 | 2.372769 | 8.275833 | 8.118507 | 2.298194 | 2.339729 | 2.467892 | 2.403434 | 7.132653 | 6.113393 |
| 1635769_at   | ---                              | CG8773         | 2.094744 | 2.094744 | 7.883697 | 7.999926 | 2.094744 | 2.094744 | 2.094744 | 2.094744 | 4.993244 | 4.144204 |
| 1628535_at   | ---                              | CG33771        | 2.39789  | 2.39789  | 8.453886 | 8.012231 | 2.39789  | 2.39789  | 2.39789  | 2.39789  | 4.792957 | 3.821289 |
| 1630335_s_at | ---                              | CG7084         | 2.116362 | 2.107521 | 7.783905 | 8.101324 | 2.281579 | 2.432375 | 2.107521 | 2.094744 | 7.437284 | 6.602456 |
| 1639331_at   | Gustatory receptor 47a           | Gr47a          | 2.200053 | 2.166531 | 8.109917 | 7.817573 | 2.165955 | 2.171479 | 2.166531 | 2.166531 | 7.421925 | 6.913105 |
| 1625058_at   | yellow-d                         | yellow-d       | 2.884006 | 2.884006 | 8.867396 | 8.454153 | 3.630592 | 2.884473 | 2.884006 | 2.935117 | 7.517431 | 6.922549 |
| 1630468_at   | ---                              | CG15247        | 2.094744 | 2.094744 | 7.959905 | 7.705899 | 2.094744 | 2.094744 | 2.094744 | 2.094744 | 2.094744 | 2.094744 |
| 1635494_at   | Monophenol oxidase               | proPO-A1       | 2.860128 | 2.893897 | 8.562001 | 8.635651 | 5.879704 | 5.14988  | 2.86912  | 4.74187  | 8.235634 | 7.900374 |
| 1638057_at   | ---                              | CG18765        | 2.101215 | 2.101215 | 7.955597 | 7.640648 | 2.105367 | 2.0995   | 2.09857  | 2.101215 | 5.13891  | 4.400382 |
| 1633947_at   | Cyp6a18                          | Cyp6a18        | 2.12166  | 2.125222 | 7.820372 | 7.805739 | 2.122254 | 2.121067 | 2.111081 | 2.12166  | 4.43434  | 5.031765 |
| 1627476_at   | BBS8                             | BBS8           | 3.286138 | 3.484975 | 9.035663 | 9.059316 | 3.184435 | 3.001744 | 3.218842 | 3.222182 | 6.291915 | 5.710939 |
| 1625431_at   | reverse polarity                 | repo           | 2.115754 | 2.115754 | 8.117351 | 7.405494 | 2.115754 | 2.115754 | 2.115754 | 2.115754 | 2.184349 | 2.862818 |
| 1630305_at   | Fork Head                        | fkh            | 2.141818 | 2.141818 | 7.894142 | 7.670602 | 2.141818 | 3.515605 | 2.141818 | 2.141818 | 2.566086 | 2.267774 |
| 1625077_at   | ---                              | CG30265        | 2.094744 | 2.094744 | 7.618883 | 7.823122 | 2.094744 | 2.094744 | 2.094744 | 2.094744 | 5.581091 | 5.122245 |
| 1638360_at   | Organic anion transporting polyp | Oatp26F        | 2.307476 | 2.347791 | 7.999616 | 7.903173 | 7.050113 | 5.867778 | 2.268054 | 2.347791 | 7.550155 | 6.407747 |
| 1629935_at   | ---                              | CG13312        | 2.094744 | 2.170842 | 7.796776 | 7.710277 | 2.094744 | 2.094744 | 2.094744 | 2.094744 | 3.792215 | 2.285812 |
| 1623732_at   | CG31410                          | Npc2e          | 2.256163 | 2.256163 | 7.551842 | 8.147224 | 2.256163 | 2.249529 | 2.246168 | 2.246168 | 6.987884 | 6.00556  |
| 1634097_s_at | --- /// --- /// ---              | CG11407 /// CG | 2.788343 | 2.722067 | 8.573852 | 8.098095 | 5.902287 | 5.604988 | 2.697542 | 3.110359 | 4.79382  | 3.990406 |
| 1629531_at   | CG6460                           | TwdlK          | 2.233713 | 2.151432 | 7.965371 | 7.576472 | 2.300614 | 2.300614 | 2.151432 | 2.151432 | 3.568536 | 3.199348 |
| 1628850_at   | ---                              | CG7056         | 2.094744 | 2.094744 | 7.72094  | 7.611863 | 2.094744 | 2.115136 | 2.094744 | 2.094744 | 3.772927 | 2.326965 |
| 1631883_at   | ---                              | ---            | 2.158672 | 2.158672 | 7.935018 | 7.52086  | 2.158672 | 2.158672 | 2.158672 | 2.158672 | 2.575059 | 2.158672 |
| 1627345_at   | HDC15381                         | CG33342        | 3.425015 | 3.425015 | 9.120955 | 8.858907 | 3.308843 | 3.425015 | 3.419953 | 3.425015 | 6.014194 | 5.578546 |
| 1631882_at   | ---                              | CG10264        | 2.094744 | 2.141008 | 7.901117 | 7.446815 | 3.929335 | 2.290884 | 2.141008 | 2.154299 | 5.761557 | 4.46411  |
| 1640580_at   | CG6185                           | Ir68a          | 2.372595 | 2.434989 | 8.000836 | 7.916982 | 2.993217 | 2.435908 | 2.372595 | 2.435908 | 6.398429 | 4.672155 |
| 1638983_at   | beethoven                        | btv            | 2.28593  | 2.09568  | 7.658582 | 7.8101   | 3.176107 | 3.921758 | 2.110523 | 2.190673 | 6.342884 | 5.62451  |
| 1628967_at   | Gene III                         | Eig71Ec        | 2.094744 | 2.094744 | 7.837819 | 7.41529  | 2.897806 | 2.123679 | 2.094744 | 2.094744 | 5.733897 | 5.716781 |
| 1638473_at   | ---                              | CG4386         | 2.286258 | 2.747097 | 7.765882 | 8.324187 | 2.094744 | 2.094744 | 2.171289 | 2.227306 | 5.615315 | 4.231462 |
| 1638012_at   | Drosophila Protein O-mannosyltr  | rt             | 2.306236 | 2.351623 | 7.955919 | 7.740543 | 2.103321 | 2.183192 | 3.277414 | 2.715084 | 3.51163  | 3.241829 |
| 1629726_at   | ---                              | CG10472        | 2.586786 | 2.5513   | 8.010595 | 8.134876 | 2.503729 | 2.755706 | 2.5513   | 2.446433 | 5.150771 | 3.944073 |
| 1626211_at   | CG11928                          | CG34351        | 2.33331  | 2.267341 | 8.11188  | 7.491603 | 3.011717 | 2.992044 | 2.473608 | 2.176024 | 6.4582   | 5.815109 |
| 1630049_at   | ---                              | CG4461         | 3.3154   | 3.321873 | 8.940216 | 8.684933 | 6.456719 | 6.021936 | 2.95783  | 3.263098 | 8.039223 | 7.399153 |
| 1641001_at   | pickpocket 20                    | ppk20          | 2.274186 | 2.230493 | 7.960066 | 7.50237  | 2.230493 | 2.209945 | 2.241395 | 2.231984 | 5.120519 | 5.655974 |
| 1624921_at   | ---                              | CG14459        | 2.101125 | 2.102728 | 7.522204 | 7.619458 | 2.095738 | 2.095738 | 2.172384 | 2.776548 | 6.082512 | 4.962902 |
| 1634139_at   | Cyp301a1                         | Cyp301a1       | 2.262188 | 2.241752 | 8.089165 | 7.276041 | 3.303538 | 2.908685 | 2.241364 | 2.241752 | 5.000801 | 3.210586 |
| 1633708_at   | Gustatory receptor 59b           | Gr59b          | 2.162896 | 2.162896 | 7.788972 | 7.370743 | 2.18056  | 2.162896 | 2.14497  | 2.162896 | 6.317699 | 5.794061 |
| 1630356_at   | CG13881                          | CG42377        | 2.146064 | 2.21636  | 7.731773 | 7.40458  | 2.115606 | 2.094744 | 2.166926 | 2.191497 | 4.345907 | 2.766706 |
| 1633077_at   | Osiris                           | Osi20          | 2.324537 | 2.324758 | 7.647945 | 7.770222 | 2.309323 | 2.310397 | 2.324537 | 2.500381 | 2.424828 | 2.324537 |
| 1626764_at   | ---                              | CG10182        | 2.094744 | 2.094744 | 7.774632 | 7.181904 | 8.404658 | 7.784872 | 2.094744 | 2.094744 | 3.94615  | 3.632474 |
| 1634439_at   | ---                              | ---            | 2.094744 | 2.094744 | 7.301916 | 7.593116 | 2.182271 | 2.094744 | 2.094744 | 2.094744 | 2.094744 | 2.094744 |
| 1635410_at   | ---                              | CG12766        | 3.147247 | 3.118796 | 8.551584 | 8.40294  | 5.266078 | 5.334784 | 3.534651 | 3.724189 | 6.761841 | 6.742049 |

|              |                                   |                 |          |          |          |          |          |          |          |          |          |          |
|--------------|-----------------------------------|-----------------|----------|----------|----------|----------|----------|----------|----------|----------|----------|----------|
| 1632767_at   | Gustatory receptor 68a            | Gr68a           | 2.094744 | 2.094744 | 7.34344  | 7.52108  | 2.094744 | 2.094744 | 2.094744 | 2.094744 | 3.169985 | 2.290854 |
| 1629693_at   | ---                               | CG15080         | 2.094744 | 2.094744 | 7.708051 | 7.148025 | 2.325199 | 2.42602  | 2.094744 | 2.224734 | 4.160153 | 3.767193 |
| 1628144_at   | ---                               | CG14273         | 2.572723 | 2.571361 | 8.282779 | 7.523564 | 2.838957 | 2.589274 | 2.572723 | 2.57068  | 3.613687 | 2.649973 |
| 1631795_at   | CG2657                            | Ir21a           | 3.147492 | 3.090946 | 8.302006 | 8.581679 | 6.286121 | 6.420551 | 3.325675 | 3.200745 | 6.999365 | 7.237105 |
| 1629483_at   | ---                               | ---             | 3.080701 | 3.150765 | 8.72591  | 8.146799 | 3.128968 | 2.749792 | 3.966362 | 3.128968 | 2.372845 | 2.51263  |
| 1625864_at   | ---                               | CG32105         | 2.094744 | 2.094744 | 7.444467 | 7.324341 | 2.123727 | 2.288917 | 2.094744 | 2.094744 | 3.400735 | 2.879858 |
| 1640524_at   | gamma-glutamyl carboxylase        | GC              | 3.062064 | 2.883701 | 8.416852 | 8.106657 | 6.312061 | 5.230478 | 2.277323 | 2.310666 | 6.157055 | 6.233302 |
| 1629926_at   | Serpin 100A                       | Spn100A         | 2.102176 | 2.102176 | 7.719396 | 7.043233 | 2.102176 | 2.102176 | 2.102176 | 2.102176 | 2.416878 | 2.127081 |
| 1629601_at   | E(spl) region transcript malpha   | malpha          | 2.111043 | 2.111043 | 6.979939 | 7.792812 | 2.162817 | 2.111043 | 2.111043 | 2.111043 | 5.092286 | 3.941853 |
| 1634498_at   | CG17152                           | Ir68b           | 2.094744 | 2.094744 | 7.173493 | 7.529053 | 2.094744 | 2.094744 | 2.094744 | 2.094744 | 3.986717 | 4.216562 |
| 1630014_at   | NADPH oxidase                     | Nox             | 2.301528 | 2.375331 | 7.118796 | 8.06146  | 2.333663 | 2.34979  | 2.333663 | 2.333663 | 6.571675 | 5.565633 |
| 1628245_at   | senseless-2                       | sens-2          | 2.423531 | 2.226389 | 7.638504 | 7.501295 | 2.226389 | 2.530162 | 2.46055  | 2.253478 | 6.889015 | 6.035083 |
| 1641176_at   | Lgr3                              | Lgr3            | 4.047759 | 4.045709 | 9.310834 | 9.261741 | 7.26083  | 6.512219 | 6.154051 | 5.514185 | 7.22819  | 6.160792 |
| 1626802_a_at | Shaker                            | Sh              | 2.545076 | 2.816441 | 7.810238 | 8.025128 | 7.576584 | 8.038008 | 2.338725 | 2.340232 | 6.527157 | 6.892049 |
| 1635514_at   | ---                               | CG1273          | 2.276541 | 2.301754 | 7.287489 | 7.72445  | 3.422633 | 2.762039 | 2.114975 | 2.301754 | 6.839633 | 5.954293 |
| 1641242_at   | Ugt86Di                           | Ugt86Di         | 2.094744 | 2.094744 | 6.857166 | 7.740609 | 2.094744 | 2.094744 | 2.094744 | 2.094744 | 6.445625 | 5.26975  |
| 1625982_at   | agrin-like                        | SP2353          | 3.430425 | 3.388857 | 8.804887 | 8.416562 | 5.205463 | 3.575034 | 3.464687 | 3.347693 | 8.214568 | 7.150524 |
| 1632685_at   | ---                               | CG32603         | 2.094744 | 2.307706 | 7.923657 | 6.875781 | 2.094744 | 2.094744 | 2.094744 | 2.094744 | 2.094744 | 2.094744 |
| 1630171_at   | CG6131                            | Cpr97Ea         | 2.150259 | 2.148209 | 7.250882 | 7.440794 | 2.316938 | 2.13727  | 2.67233  | 3.490562 | 3.181898 | 2.911003 |
| 1623022_at   | ---                               | CG15820         | 2.094744 | 2.094744 | 7.032722 | 7.534241 | 2.094744 | 2.094744 | 2.094744 | 2.094744 | 4.941434 | 4.627695 |
| 1625059_at   | Leucokinin                        | Leucokinin      | 2.094744 | 2.094744 | 7.559284 | 6.999556 | 2.094744 | 2.094744 | 2.094744 | 2.094744 | 6.189936 | 4.836395 |
| 1635272_a_at | ---                               | CG10205         | 2.096833 | 2.094744 | 7.187001 | 7.361835 | 2.094744 | 2.094744 | 2.094744 | 2.094744 | 2.09479  | 2.094744 |
| 1626929_at   | CG9357                            | Cht8            | 2.116346 | 2.131491 | 7.692081 | 6.888806 | 2.682173 | 2.52024  | 2.137337 | 2.130883 | 4.173027 | 3.745511 |
| 1626309_at   | Mucin 68D                         | Muc68D          | 2.10676  | 2.171993 | 7.335031 | 7.237499 | 2.10676  | 2.113415 | 2.115634 | 2.115634 | 6.101254 | 5.383626 |
| 1631236_at   | lin-28                            | lin-28          | 2.175548 | 2.175548 | 7.540286 | 7.104181 | 2.175548 | 2.193568 | 2.175548 | 2.39137  | 3.599293 | 3.525487 |
| 1625779_at   | forkhead domain 59A               | fd59A           | 2.094744 | 2.094744 | 7.153041 | 7.326911 | 2.094744 | 2.475933 | 2.094744 | 2.094744 | 2.094744 | 2.097517 |
| 1638823_at   | --- /// ---                       | CG30259 /// Dm  | 2.094744 | 2.094744 | 7.407781 | 7.064405 | 2.788898 | 2.206573 | 2.094744 | 2.094744 | 5.842359 | 5.325361 |
| 1625336_s_at | ---                               | ---             | 2.094744 | 2.094744 | 6.689605 | 7.741988 | 2.094744 | 2.094744 | 2.094744 | 2.094744 | 6.243588 | 5.138107 |
| 1627937_at   | ---                               | CG32413         | 2.567059 | 2.567059 | 8.033643 | 7.338996 | 2.567059 | 2.567059 | 2.634371 | 2.567059 | 4.392711 | 3.700488 |
| 1624082_at   | Olfactory receptor 33B.3          | Or33c           | 2.094744 | 2.094744 | 7.115085 | 7.229104 | 2.094744 | 2.094744 | 2.094744 | 2.094744 | 2.249586 | 2.098482 |
| 1641705_at   | ---                               | ---             | 2.487532 | 2.416282 | 7.594343 | 7.453146 | 2.487532 | 2.31023  | 2.487532 | 2.343424 | 2.223386 | 2.271673 |
| 1622974_at   | ---                               | CG4000          | 2.094744 | 2.094744 | 7.263253 | 7.069117 | 2.094744 | 2.094744 | 2.094744 | 2.094744 | 6.53304  | 4.250834 |
| 1623484_at   | vestigial                         | vg              | 2.123649 | 2.118846 | 6.88215  | 7.464631 | 4.739552 | 5.238953 | 2.121628 | 2.094744 | 7.904965 | 7.337639 |
| 1640192_at   | nanchung                          | nan             | 2.274101 | 2.280496 | 7.323078 | 7.324528 | 2.449321 | 2.309507 | 2.302242 | 2.280496 | 3.493571 | 3.15532  |
| 1635226_at   | lysyl oxidase-like 2              | lox2            | 2.123988 | 2.123988 | 7.079739 | 7.196275 | 2.466119 | 2.331024 | 2.123988 | 2.123988 | 5.231878 | 4.261936 |
| 1640308_a_at | ---                               | CG3216          | 2.098779 | 2.142291 | 7.203881 | 7.058031 | 4.085632 | 3.50299  | 2.518422 | 2.518422 | 4.02642  | 3.083828 |
| 1636135_at   | ---                               | CG13931         | 2.094744 | 2.094744 | 6.996041 | 7.182165 | 2.094744 | 2.094744 | 2.106584 | 2.103789 | 2.105451 | 2.094744 |
| 1637577_at   | Zinc/iron regulated transporter-r | Zip3            | 3.357341 | 3.323595 | 8.418107 | 8.225225 | 4.975725 | 4.221781 | 3.777259 | 3.566646 | 5.209156 | 4.477107 |
| 1624681_at   | ---                               | ---             | 2.205977 | 2.205977 | 7.367898 | 7.006029 | 2.58091  | 2.220646 | 2.205977 | 2.205977 | 4.918929 | 3.719419 |
| 1639262_at   | --- /// ---                       | CG11669 /// Dse | 2.094744 | 2.094744 | 7.302424 | 6.841359 | 2.094744 | 2.094744 | 2.094744 | 2.373874 | 5.777679 | 5.33776  |
| 1622987_at   | CG15325                           | Ir7g            | 2.094744 | 2.094744 | 7.188649 | 6.953189 | 2.094744 | 2.094744 | 2.094744 | 2.094744 | 2.100858 | 2.095846 |
| 1633366_at   | ---                               | ---             | 2.094969 | 2.106653 | 7.218854 | 6.93044  | 2.094969 | 2.217902 | 2.094969 | 2.094969 | 7.35018  | 6.848398 |
| 1639287_at   | ---                               | CG9877          | 2.114002 | 2.369988 | 7.179541 | 7.233026 | 2.117581 | 2.094744 | 2.242719 | 2.116925 | 2.094925 | 2.094744 |

|              |                                   |                  |          |          |          |          |          |          |          |          |          |          |
|--------------|-----------------------------------|------------------|----------|----------|----------|----------|----------|----------|----------|----------|----------|----------|
| 1635524_at   | ---                               | CG30427          | 2.094744 | 2.094744 | 7.570638 | 6.51109  | 3.597754 | 2.796578 | 2.094744 | 2.094744 | 8.121423 | 7.780051 |
| 1631781_at   | ---                               | CG18530          | 2.681937 | 2.388274 | 7.697927 | 7.239095 | 3.276158 | 3.502231 | 2.188531 | 2.19219  | 8.414704 | 7.498712 |
| 1635232_at   | ---                               | CG13983          | 2.094744 | 2.094744 | 6.870109 | 7.181308 | 2.094744 | 2.094744 | 2.094744 | 2.094744 | 2.094744 | 2.094744 |
| 1638223_at   | ---                               | CG13361          | 2.34304  | 2.54876  | 7.572221 | 7.145969 | 2.667729 | 2.630086 | 2.568093 | 2.487952 | 3.289822 | 2.683309 |
| 1629511_at   | ---                               | CG5326           | 2.192284 | 2.19111  | 7.366535 | 6.823336 | 3.292177 | 3.084647 | 2.19111  | 2.167809 | 6.343045 | 5.420399 |
| 1640027_a_at | ---                               | CG32792          | 2.094744 | 2.094744 | 6.914727 | 7.072687 | 2.094744 | 2.094744 | 2.094744 | 2.094744 | 2.111242 | 2.130239 |
| 1625654_at   | glutamate receptor                | GluRIIB          | 2.508394 | 2.501152 | 7.561194 | 7.23581  | 2.5108   | 2.5108   | 2.495997 | 2.5108   | 5.906438 | 5.242333 |
| 1638973_s_at | ---                               | CG11149          | 2.21465  | 2.296727 | 7.548956 | 6.733874 | 3.318668 | 2.21465  | 2.220762 | 2.636019 | 3.812575 | 3.366085 |
| 1629727_at   | ---                               | CG14258          | 2.910151 | 2.826674 | 7.589704 | 7.901215 | 5.322067 | 4.436326 | 2.55281  | 2.696161 | 6.418253 | 4.824421 |
| 1630241_at   | lambdaTry                         | lambdaTry        | 2.190029 | 2.159459 | 7.309044 | 6.78508  | 2.171713 | 2.174622 | 2.18712  | 2.094744 | 4.402467 | 3.457011 |
| 1634054_at   | Droninac                          | ninaC            | 2.094744 | 2.094744 | 6.851767 | 7.078661 | 3.123566 | 3.648609 | 2.094744 | 2.094744 | 2.559393 | 2.433849 |
| 1628289_at   | empty spiracles                   | ems              | 2.317148 | 2.317148 | 6.918616 | 7.44093  | 2.784612 | 4.103203 | 2.317148 | 2.317148 | 7.145592 | 6.650556 |
| 1640593_at   | ---                               | CG14570          | 2.123071 | 2.123071 | 6.786072 | 7.147892 | 2.123071 | 2.123071 | 2.123071 | 2.123071 | 3.191772 | 2.840358 |
| 1640956_at   | ---                               | CG4725           | 2.109443 | 2.107399 | 7.301597 | 6.595558 | 2.109443 | 2.094744 | 2.107399 | 2.109443 | 2.506491 | 2.110464 |
| 1624596_at   | ---                               | CG31463          | 2.094744 | 2.094744 | 6.750451 | 7.107019 | 2.094744 | 2.094744 | 2.094744 | 2.094744 | 2.768042 | 2.464268 |
| 1633050_at   | CG12813                           | Npc2d            | 3.344312 | 3.317525 | 7.942233 | 8.275425 | 3.280628 | 3.214539 | 3.676883 | 3.332686 | 6.521376 | 5.517072 |
| 1624736_a_at | ---                               | CG5819           | 2.647097 | 2.649118 | 7.510465 | 7.323482 | 5.564605 | 4.466329 | 2.619548 | 2.649118 | 5.88862  | 5.25821  |
| 1640529_at   | ---                               | CG15408          | 2.48269  | 2.692451 | 7.765075 | 6.931738 | 2.431121 | 2.443607 | 2.459426 | 2.527258 | 5.759366 | 5.18302  |
| 1631327_at   | m-spondin                         | mspo             | 2.094744 | 2.094744 | 6.798553 | 6.849282 | 2.647733 | 2.424448 | 2.094744 | 2.094744 | 8.071419 | 7.379304 |
| 1629042_at   | ---                               | CG15674          | 2.331741 | 2.461586 | 6.688984 | 7.552317 | 4.174827 | 4.406881 | 2.172813 | 2.366792 | 7.393502 | 6.719625 |
| 1630389_at   | ---                               | CG13178          | 2.153391 | 2.153391 | 7.068052 | 6.628333 | 2.230344 | 2.932273 | 2.153391 | 2.153391 | 5.003192 | 4.396485 |
| 1641113_at   | ---                               | CG13083          | 2.505124 | 2.505124 | 7.5159   | 6.863308 | 2.505124 | 2.505124 | 2.505124 | 2.470372 | 4.637036 | 3.545485 |
| 1631668_at   | ---                               | CG17147          | 2.094744 | 2.094744 | 7.184181 | 6.36714  | 2.094744 | 2.094744 | 2.094744 | 2.094744 | 6.462832 | 6.346427 |
| 1629551_s_at | ---                               | CG12268          | 2.647094 | 2.619692 | 7.272767 | 7.354101 | 3.594054 | 3.607642 | 2.729622 | 2.855352 | 8.358619 | 7.533987 |
| 1626903_at   | ---                               | CG3355           | 2.121329 | 2.121206 | 6.559707 | 7.031668 | 2.094744 | 2.094744 | 2.094744 | 2.097928 | 2.094744 | 2.094744 |
| 1629637_at   | ---                               | CG13794          | 2.094744 | 2.102407 | 6.876476 | 6.650224 | 5.437122 | 4.774094 | 2.102407 | 2.118017 | 6.309931 | 5.855347 |
| 1634240_at   | ---                               | CG5107           | 2.094744 | 2.094744 | 6.938206 | 6.576388 | 2.094744 | 2.511269 | 2.094744 | 2.094744 | 7.829002 | 7.473181 |
| 1637894_at   | ---                               | CG14509          | 2.31749  | 2.376034 | 6.653498 | 7.342729 | 2.560585 | 2.368425 | 2.294526 | 2.250743 | 7.151943 | 7.227529 |
| 1624137_at   | ---                               | CG11911          | 2.228911 | 2.231562 | 7.06523  | 6.693123 | 2.176006 | 2.122897 | 2.228911 | 2.53665  | 3.48922  | 2.973857 |
| 1634029_at   | Ugt86Dj                           | Ugt86Dj          | 2.094744 | 2.094744 | 6.941409 | 6.541629 | 3.139838 | 2.109843 | 2.094744 | 2.094744 | 5.501317 | 4.724459 |
| 1633189_at   | ---                               | CG13646          | 2.267895 | 2.353505 | 6.57923  | 7.325979 | 2.332862 | 2.366839 | 2.699415 | 2.54183  | 5.035487 | 4.097323 |
| 1623817_at   | ---                               | CG7916           | 2.520013 | 2.537209 | 7.178619 | 7.133902 | 2.51083  | 2.542659 | 2.542659 | 2.542659 | 2.57579  | 2.542659 |
| 1635194_at   | ---                               | CG13869          | 3.599119 | 3.437877 | 8.257211 | 8.032819 | 5.503472 | 4.275584 | 3.437877 | 3.442657 | 6.644746 | 5.92108  |
| 1639537_at   | ---                               | CG4587           | 2.094744 | 2.094744 | 6.567687 | 6.856263 | 2.094744 | 2.485289 | 2.094744 | 2.094744 | 7.389171 | 6.723811 |
| 1624344_at   | ---                               | CG17922          | 2.908763 | 2.925229 | 7.566261 | 7.431993 | 2.925229 | 2.979203 | 2.925229 | 2.925229 | 5.386518 | 4.552929 |
| 1630109_at   | anon-SAGE:Wang-073 /// heat-shock | CG8628 /// Hsc70 | 2.807938 | 2.865041 | 7.292949 | 7.435098 | 2.256619 | 2.820518 | 3.231127 | 3.231127 | 3.264556 | 3.231127 |
| 1641631_at   | /// Imaginal disc growth factor   | CG4982 /// Idgf  | 2.094744 | 2.094744 | 6.125333 | 7.069147 | 2.094744 | 2.094744 | 2.094744 | 2.094744 | 3.112868 | 2.221157 |
| 1627797_at   | ---                               | CG10019          | 3.543105 | 3.587047 | 8.338495 | 7.791109 | 3.546501 | 3.777244 | 3.508902 | 3.695056 | 5.924616 | 5.368824 |
| 1631977_at   | prolyl-4-hydroxylase-alpha SG1    | PH4alphaSG1      | 2.113211 | 2.113211 | 6.69637  | 6.49043  | 3.885929 | 3.169717 | 2.261896 | 2.213642 | 4.882514 | 2.375824 |
| 1636007_at   | Ance-2                            | Ance-2           | 2.094744 | 2.094744 | 6.910442 | 6.238495 | 2.094744 | 2.094744 | 2.094744 | 2.094744 | 2.70888  | 2.103091 |
| 1628449_at   | Ugt86Dc                           | Ugt86Dc          | 2.10994  | 2.10994  | 6.415789 | 6.712005 | 2.10994  | 2.10994  | 2.094744 | 2.109082 | 4.919459 | 3.612579 |
| 1636603_a_at | ---                               | CG9297           | 2.136235 | 2.170999 | 6.620362 | 6.587701 | 4.727874 | 4.983784 | 2.136235 | 2.105812 | 5.241434 | 4.787423 |
| 1624703_at   | proboscipedia                     | pb               | 3.062889 | 3.077355 | 7.172539 | 7.867082 | 2.979764 | 3.130038 | 4.180594 | 3.495797 | 6.934788 | 6.213929 |

|              |                               |                |          |          |          |          |          |          |          |          |          |          |
|--------------|-------------------------------|----------------|----------|----------|----------|----------|----------|----------|----------|----------|----------|----------|
| 1632242_a_at | Syntrophin-like 1             | Syn1           | 2.229288 | 2.31562  | 6.77056  | 6.653673 | 2.858148 | 2.663772 | 2.206874 | 2.838281 | 7.132214 | 6.553049 |
| 1623093_at   | ---                           | CG13188        | 2.094744 | 2.094744 | 6.381413 | 6.687228 | 2.094744 | 2.094744 | 2.094744 | 2.094744 | 3.026839 | 2.678593 |
| 1630740_at   | ---                           | CG4363         | 2.094744 | 2.094744 | 6.510596 | 6.539128 | 6.757826 | 5.674425 | 2.094744 | 2.094744 | 7.033889 | 6.055145 |
| 1626324_at   | Cyp309a1                      | Cyp309a1       | 2.174006 | 2.174006 | 6.835375 | 6.366782 | 2.174006 | 2.174006 | 2.271799 | 2.174006 | 2.175449 | 2.174006 |
| 1625099_at   | ---                           | CG17999        | 2.170618 | 2.170618 | 6.789939 | 6.398063 | 2.170618 | 2.094744 | 2.170618 | 2.170618 | 4.134786 | 3.341963 |
| 1636493_at   | delilah                       | dei            | 3.267804 | 3.180143 | 7.775918 | 7.51052  | 3.899603 | 4.418089 | 3.05893  | 3.175659 | 6.900394 | 6.357912 |
| 1633720_s_at | ---                           | CG8795         | 3.052724 | 3.086942 | 7.843669 | 7.125547 | 4.039444 | 3.622372 | 3.287783 | 3.227113 | 3.816895 | 3.501033 |
| 1625462_s_at | ---                           | CG31221        | 3.089882 | 3.393331 | 7.734644 | 7.560208 | 3.585845 | 3.667001 | 3.701953 | 3.598887 | 4.777007 | 4.50239  |
| 1629747_at   | CG8511                        | Cpr49Ag        | 2.102381 | 2.103556 | 6.634045 | 6.363623 | 2.114717 | 2.102381 | 2.102381 | 2.102381 | 3.780851 | 2.735318 |
| 1635898_at   | ---                           | CG14856        | 2.268082 | 2.285361 | 6.570801 | 6.764607 | 2.285361 | 2.285361 | 2.285361 | 2.31665  | 4.454713 | 3.805968 |
| 1639362_s_at | --- /// ---                   | CG10476 /// CG | 2.11955  | 2.105831 | 6.274891 | 6.725661 | 2.488338 | 2.105831 | 2.105831 | 2.105831 | 5.497105 | 4.827274 |
| 1630237_a_at | Distal-less                   | Dll            | 2.73692  | 2.694767 | 7.23155  | 6.948359 | 3.3892   | 3.250327 | 2.703393 | 2.707478 | 5.357264 | 5.012067 |
| 1623711_at   | pickpocket 4                  | Nach           | 2.094744 | 2.094744 | 6.73606  | 6.188856 | 2.094744 | 2.094744 | 2.144096 | 2.094744 | 4.368098 | 3.052628 |
| 1632540_at   | trypsin iota                  | iotaTry        | 2.428469 | 2.453701 | 7.105529 | 6.511793 | 2.419333 | 2.208893 | 2.439114 | 2.453701 | 5.32443  | 4.469778 |
| 1641712_at   | ---                           | CG8784         | 2.094744 | 2.094744 | 6.136136 | 6.710083 | 2.094744 | 2.094744 | 2.094744 | 2.094744 | 4.277751 | 3.7741   |
| 1636604_at   | ---                           | CG12490        | 2.094744 | 2.094744 | 6.172591 | 6.621484 | 2.139655 | 2.094744 | 2.095533 | 2.094744 | 6.257172 | 5.37704  |
| 1641225_at   | ---                           | CG7432         | 3.004657 | 2.931936 | 7.027035 | 7.496493 | 3.913422 | 2.777507 | 2.400712 | 2.586579 | 8.068588 | 7.516972 |
| 1627951_at   | ---                           | CG33289        | 2.208971 | 2.159489 | 6.217739 | 6.709539 | 6.452858 | 6.089422 | 2.208971 | 2.109591 | 5.084671 | 4.195352 |
| 1631563_at   | Gustatory receptor 21a        | Gr21a          | 2.094744 | 2.094744 | 6.812937 | 5.894423 | 2.094744 | 2.094744 | 2.094744 | 2.094744 | 2.542333 | 2.178948 |
| 1636927_at   | ---                           | CG30379        | 2.094744 | 2.094744 | 6.158622 | 6.527679 | 2.094744 | 2.094744 | 2.094744 | 2.094744 | 5.372699 | 4.679919 |
| 1623759_at   | ---                           | CG13428        | 3.130558 | 3.178276 | 7.452874 | 7.326929 | 3.114179 | 3.114179 | 3.146711 | 3.130558 | 4.05141  | 3.390757 |
| 1627350_at   | ---                           | CG12420        | 2.256669 | 2.256669 | 6.478734 | 6.487589 | 3.020816 | 2.658142 | 2.256669 | 2.256669 | 3.531796 | 2.941189 |
| 1633994_at   | CG17793                       | CG34402        | 2.102667 | 2.106552 | 6.159297 | 6.498607 | 2.16596  | 2.220039 | 2.104762 | 2.102667 | 7.148228 | 6.517266 |
| 1633636_at   | CG10633                       | Ir64a          | 2.401073 | 2.330937 | 6.857409 | 6.315219 | 3.632039 | 4.202791 | 2.401073 | 2.401073 | 7.466444 | 7.042673 |
| 1636420_at   | ---                           | CG16826        | 2.094744 | 2.094744 | 5.973992 | 6.529897 | 2.094744 | 2.094744 | 2.094744 | 2.094744 | 3.365515 | 2.423713 |
| 1633474_x_at | ---                           | CG32603        | 3.060727 | 3.022278 | 7.471133 | 6.891295 | 2.686839 | 2.960875 | 2.960875 | 2.973717 | 2.783743 | 2.916425 |
| 1641585_at   | ---                           | CG5768         | 2.634224 | 2.270934 | 6.750723 | 6.418699 | 2.270934 | 2.270934 | 2.460206 | 2.413208 | 3.832429 | 3.943385 |
| 1629729_at   | ---                           | CG31019        | 2.094744 | 2.094744 | 6.565208 | 5.864127 | 2.094744 | 2.157766 | 2.094744 | 2.327122 | 5.070117 | 3.474553 |
| 1624479_at   | CDK7-like                     | CG6800         | 2.337919 | 2.337919 | 6.195298 | 6.709305 | 5.943338 | 5.317655 | 2.337919 | 2.337919 | 4.726647 | 2.65243  |
| 1638896_at   | CG1919                        | Cpr62Bc        | 2.094744 | 2.094744 | 5.98722  | 6.411134 | 2.094744 | 2.094744 | 2.094744 | 2.094744 | 2.094744 | 2.094744 |
| 1637395_at   | ---                           | CG13084        | 2.094744 | 2.127346 | 6.140786 | 6.286075 | 2.127346 | 2.127346 | 2.115755 | 2.127346 | 6.549581 | 5.685446 |
| 1627818_s_at | Glutamic acid decarboxylase 1 | Gad1           | 2.094744 | 2.117097 | 6.496582 | 5.918753 | 5.08515  | 5.118706 | 2.117097 | 2.117097 | 4.034169 | 2.381952 |
| 1630381_at   | CG18554                       | Octbeta3R      | 2.126331 | 2.126331 | 5.991572 | 6.463816 | 2.126331 | 2.126331 | 2.126331 | 2.382021 | 3.58897  | 2.751504 |
| 1623027_s_at | --- /// ---                   | CG6271 /// CG6 | 2.475224 | 2.273767 | 6.482053 | 6.469013 | 2.67713  | 3.517598 | 4.411345 | 5.041244 | 4.651291 | 3.780996 |
| 1629863_at   | Cad89D                        | Cad89D         | 2.272653 | 2.318864 | 6.381553 | 6.399005 | 2.451664 | 2.315266 | 2.428906 | 2.423688 | 5.117338 | 3.883858 |
| 1631774_at   | CG7076                        | Cpr66Cb        | 2.680035 | 2.933711 | 6.722685 | 7.065128 | 2.342207 | 2.359734 | 5.557127 | 4.991262 | 2.996973 | 2.788275 |
| 1625894_at   | ---                           | CG11370        | 3.129227 | 3.147952 | 7.149089 | 7.282558 | 6.914724 | 6.040028 | 3.52905  | 4.414015 | 6.352482 | 5.685905 |
| 1625238_at   | ---                           | CG12003        | 2.145948 | 2.094744 | 6.274103 | 6.120502 | 2.188592 | 2.191635 | 2.174399 | 2.152148 | 2.174399 | 2.193734 |
| 1629447_at   | ---                           | CG32829        | 2.952826 | 2.371323 | 6.736694 | 6.722167 | 4.01075  | 3.705842 | 3.292723 | 3.163218 | 6.3863   | 5.443147 |
| 1622920_at   | Cosens-Manning mutant         | trp            | 2.21272  | 2.330391 | 6.320129 | 6.344008 | 2.161116 | 2.195407 | 2.433079 | 2.407619 | 3.87787  | 2.647561 |
| 1636572_at   | Dual oxidase                  | Duox           | 2.155992 | 2.133919 | 6.227853 | 6.141985 | 2.245584 | 3.154696 | 2.134987 | 2.146079 | 3.94441  | 3.111475 |
| 1625039_at   | CG42291                       | Ir60d          | 2.094744 | 2.094744 | 6.43878  | 5.82376  | 2.094744 | 2.094744 | 2.094744 | 2.094744 | 3.557507 | 3.037176 |
| 1637076_at   | ---                           | CG8861         | 2.246536 | 2.181811 | 6.457766 | 6.036385 | 9.0292   | 8.75248  | 2.237384 | 2.20141  | 2.655876 | 2.254037 |

|              |                                   |               |          |          |          |          |          |          |          |          |          |          |
|--------------|-----------------------------------|---------------|----------|----------|----------|----------|----------|----------|----------|----------|----------|----------|
| 1629066_at   | Drosophila Corazonin Receptor     | GRHRII        | 2.280681 | 2.648568 | 6.326942 | 6.657626 | 2.279877 | 2.317183 | 2.239865 | 2.555571 | 8.215025 | 7.564399 |
| 1627260_at   | ---                               | CG11693       | 2.111836 | 2.111836 | 6.184893 | 6.080475 | 2.141021 | 2.522552 | 2.111836 | 2.121868 | 2.90459  | 2.330613 |
| 1631233_at   | CG10296                           | Hr83          | 2.094744 | 2.094744 | 6.02826  | 6.151798 | 2.094744 | 2.094744 | 2.094744 | 2.094744 | 5.249829 | 5.106366 |
| 1632752_at   | drostatin-A4                      | Ast           | 3.19279  | 3.004308 | 6.908615 | 7.257185 | 4.629851 | 4.287332 | 3.197006 | 3.130784 | 5.11296  | 6.046259 |
| 1624000_at   | ---                               | CG13443       | 2.193328 | 2.193328 | 6.299279 | 6.038973 | 6.091963 | 5.187516 | 2.193328 | 2.225211 | 6.751224 | 5.485672 |
| 1638688_at   | ---                               | CG15269       | 2.094744 | 2.094744 | 5.971214 | 6.163693 | 2.094744 | 2.378204 | 2.094744 | 2.094744 | 2.160015 | 2.094744 |
| 1638490_at   | ---                               | CG15365       | 2.192145 | 2.192145 | 6.202805 | 6.120828 | 2.192145 | 2.192145 | 2.192145 | 2.192145 | 2.189029 | 2.192145 |
| 1629522_at   | Osiris                            | Osi3          | 2.714912 | 2.714527 | 6.833332 | 6.532157 | 2.708711 | 2.715104 | 2.714527 | 2.714527 | 3.891504 | 3.357678 |
| 1629530_at   | Immune induced molecule 23        | IM23          | 2.094744 | 2.094744 | 6.32229  | 5.798769 | 2.094744 | 2.094744 | 2.094744 | 2.094744 | 2.189422 | 2.094744 |
| 1638525_at   | Odorant receptor 67c              | Or67c         | 2.094744 | 2.094744 | 6.087194 | 6.031878 | 2.094744 | 2.094744 | 2.094744 | 2.094744 | 2.106047 | 2.094744 |
| 1626891_at   | ---                               | CG15414       | 2.117976 | 2.11998  | 6.166436 | 5.981468 | 2.101788 | 2.117976 | 2.109197 | 2.109197 | 3.078169 | 2.161485 |
| 1636979_at   | ---                               | CG7912        | 2.094744 | 2.094744 | 6.060051 | 6.029883 | 2.32451  | 2.094744 | 2.094744 | 2.094744 | 2.891262 | 3.092493 |
| 1625523_at   | forkhead domain 64A               | fd64A         | 2.420703 | 2.852791 | 6.660477 | 6.469431 | 6.505582 | 6.232281 | 2.606863 | 2.803289 | 7.417178 | 6.28286  |
| 1638081_at   | ---                               | CG3119        | 2.120241 | 2.120241 | 5.815702 | 6.27478  | 2.120241 | 2.120241 | 2.120241 | 2.120241 | 2.880699 | 3.509831 |
| 1637434_at   | ---                               | CG14563       | 2.094744 | 2.094744 | 5.916275 | 6.083486 | 2.094744 | 2.094744 | 2.094744 | 2.094744 | 2.114026 | 2.094744 |
| 1629011_at   | CG5476                            | TwdIN         | 2.094744 | 2.094744 | 5.998469 | 5.977884 | 2.094744 | 2.094744 | 2.094744 | 2.094744 | 4.377265 | 3.131101 |
| 1630462_at   | Odorant-binding protein 50e       | Obp50e        | 2.620896 | 2.342343 | 5.852462 | 6.884855 | 7.747109 | 7.256432 | 2.540582 | 2.640932 | 6.598165 | 6.015708 |
| 1641688_at   | ---                               | CG18136       | 3.132359 | 2.953017 | 6.776626 | 7.017919 | 2.299883 | 2.215966 | 7.296215 | 7.244869 | 2.571046 | 2.335104 |
| 1639776_s_at | nyobe                             | nyo           | 2.160008 | 2.101918 | 5.604209 | 6.352621 | 2.148531 | 2.160197 | 2.119078 | 2.102127 | 5.040221 | 4.099691 |
| 1639167_at   | CG14487                           | Ir54a         | 2.12956  | 2.12956  | 6.127078 | 5.78588  | 3.922678 | 4.720665 | 2.134168 | 2.134168 | 5.396152 | 4.643318 |
| 1632701_at   | Peptidyl-alpha-hydroxyglycine-al  | Pal           | 2.094744 | 2.094744 | 5.779845 | 6.056983 | 3.195582 | 2.484649 | 2.094744 | 2.094744 | 4.415769 | 3.98403  |
| 1625463_at   | Histamine-gated chloride channe   | ort           | 2.650984 | 3.030798 | 6.48027  | 6.84168  | 2.761365 | 2.094744 | 2.094744 | 2.178527 | 4.775454 | 4.754108 |
| 1627136_at   | kinesin-73                        | Khc-73        | 2.341768 | 2.368696 | 6.476054 | 5.858208 | 7.569523 | 8.252703 | 2.19879  | 2.307712 | 2.526546 | 2.339807 |
| 1637354_at   | ---                               | CG8172        | 2.337294 | 2.417118 | 6.226544 | 6.108576 | 2.094744 | 2.094744 | 3.110697 | 3.801899 | 2.094744 | 2.094744 |
| 1630012_at   | CG31225                           | Ir94f         | 2.094744 | 2.094744 | 6.174303 | 5.588632 | 2.094744 | 2.094744 | 2.094744 | 2.094744 | 2.097868 | 2.094744 |
| 1633009_a_at | ---                               | ---           | 2.111469 | 2.094744 | 6.282624 | 5.48095  | 2.111469 | 2.111469 | 2.094744 | 2.111469 | 5.750317 | 5.37357  |
| 1633562_at   | ---                               | CG14569       | 2.19634  | 2.19634  | 5.723435 | 6.220913 | 2.19634  | 2.19634  | 2.19634  | 2.19634  | 3.298264 | 2.577292 |
| 1623981_at   | ---                               | CG7017        | 2.094744 | 2.094744 | 6.202472 | 5.510734 | 2.094744 | 2.094744 | 2.094744 | 2.094744 | 4.341343 | 4.481219 |
| 1639956_at   | ---                               | CG17760       | 2.632593 | 2.912084 | 6.683974 | 6.382047 | 7.34047  | 7.003889 | 2.588369 | 2.666624 | 6.86043  | 6.629703 |
| 1626574_at   | ---                               | CG9935        | 3.147369 | 3.540408 | 7.142587 | 7.065115 | 7.5242   | 6.553758 | 3.064615 | 3.546671 | 7.901719 | 7.568943 |
| 1628585_at   | Guanylyl cyclase at 89Da          | Gyc-89Da      | 2.108649 | 2.095859 | 5.610324 | 6.034528 | 3.835524 | 3.673008 | 2.107862 | 2.103513 | 6.223866 | 5.306193 |
| 1630419_a_at | ---                               | CG7300        | 2.698208 | 2.162794 | 6.338312 | 5.960431 | 2.16045  | 2.094744 | 2.613979 | 2.448303 | 2.161619 | 2.143293 |
| 1623390_at   | ---                               | CG11768       | 2.094744 | 2.094744 | 6.036641 | 5.57435  | 2.094744 | 2.094744 | 2.094744 | 2.094744 | 3.665957 | 2.699151 |
| 1627734_at   | myogenic determination            | nau           | 2.094744 | 2.094744 | 5.722591 | 5.85963  | 4.146702 | 4.481901 | 2.094744 | 2.094744 | 5.233953 | 4.240901 |
| 1641637_at   | CG17382                           | Ir94h         | 2.094744 | 2.094744 | 5.586748 | 5.955675 | 2.094744 | 2.094744 | 2.094744 | 2.094744 | 2.820918 | 2.420879 |
| 1637777_at   | ---                               | CG13982       | 2.094744 | 2.094744 | 5.726295 | 5.795913 | 2.094744 | 2.555421 | 2.094744 | 2.125037 | 7.990701 | 7.226797 |
| 1633281_at   | CG15240                           | CG42541       | 2.73863  | 2.482061 | 6.52216  | 5.978282 | 3.102456 | 2.853378 | 2.385885 | 2.385885 | 5.402102 | 4.56225  |
| 1638251_at   | ---                               | CG5549        | 2.146178 | 2.146178 | 5.77081  | 5.732732 | 2.15038  | 2.140593 | 2.146178 | 2.146178 | 2.248526 | 2.146178 |
| 1628078_at   | ---                               | CG2256        | 2.094744 | 2.094744 | 5.433975 | 5.922775 | 2.094744 | 2.094744 | 2.094744 | 2.094744 | 2.094744 | 2.094744 |
| 1635384_at   | Zinc/iron regulated transporter-r | ZIP1          | 2.153317 | 2.153317 | 6.056053 | 5.407863 | 4.443549 | 2.153317 | 2.153317 | 2.153317 | 3.879297 | 4.110659 |
| 1641734_at   | rhodopsin                         | ninaE         | 2.238263 | 2.238263 | 5.572623 | 6.053236 | 2.238263 | 2.238263 | 2.238263 | 2.238263 | 2.503391 | 2.325463 |
| 1634061_a_at | retinal degeneration C            | rdgC          | 2.135982 | 2.126458 | 5.739285 | 5.640515 | 2.428099 | 2.470906 | 2.136215 | 2.136379 | 3.66306  | 4.785685 |
| 1633356_s_at | Dalpha2                           | nAcRalpha-96A | 2.258021 | 2.258021 | 6.134148 | 5.494337 | 2.258021 | 2.502022 | 2.258021 | 2.258021 | 2.258443 | 2.258021 |

|              |                                   |               |          |          |          |          |          |          |          |          |          |          |
|--------------|-----------------------------------|---------------|----------|----------|----------|----------|----------|----------|----------|----------|----------|----------|
| 1632356_at   | Gustatory receptor 65C.1          | Gr65a         | 2.094744 | 2.094744 | 5.541822 | 5.756744 | 2.094744 | 2.094744 | 2.094744 | 2.094744 | 5.414872 | 4.496352 |
| 1627272_at   | ---                               | CG30380       | 2.709407 | 2.943209 | 6.390221 | 6.368964 | 2.937752 | 2.943209 | 2.865277 | 3.171096 | 5.133249 | 5.553022 |
| 1633952_at   | ---                               | CG7080        | 2.094744 | 2.094744 | 5.808846 | 5.484493 | 2.094744 | 2.094744 | 2.094744 | 2.094744 | 4.942356 | 3.63698  |
| 1624129_s_at | ---                               | CG7708        | 2.094744 | 2.094744 | 5.760257 | 5.524606 | 3.051529 | 2.277401 | 2.094744 | 2.094744 | 6.070863 | 5.359903 |
| 1638253_at   | ---                               | CG5361        | 2.094744 | 2.094744 | 5.664346 | 5.616326 | 2.094744 | 2.094744 | 2.094744 | 2.094744 | 3.622044 | 3.02936  |
| 1635636_at   | Takeout                           | to            | 2.097662 | 2.095474 | 5.912368 | 5.366139 | 4.029371 | 2.366579 | 2.097662 | 2.097662 | 5.279262 | 5.595006 |
| 1623006_at   | cocaine-sensitive serotonin trans | SerT          | 2.94024  | 2.896    | 6.333346 | 6.550715 | 4.450053 | 4.731791 | 2.932926 | 2.90607  | 7.304291 | 6.504465 |
| 1629380_at   | Chorion protein 16                | Cp16          | 2.094744 | 2.094744 | 5.498225 | 5.701572 | 2.094744 | 2.094744 | 2.094744 | 2.094744 | 3.430364 | 2.612475 |
| 1635689_at   | Gene II                           | Lcp2          | 2.094744 | 2.094744 | 5.555897 | 5.625014 | 2.094744 | 2.094744 | 2.094744 | 2.094744 | 2.717396 | 3.520735 |
| 1627368_at   | ---                               | CG15497       | 2.921938 | 2.766197 | 6.406631 | 6.261787 | 5.807151 | 6.106965 | 2.945996 | 2.788981 | 6.293931 | 5.107898 |
| 1639926_at   | ---                               | CG9395        | 2.094744 | 2.094744 | 5.401908 | 5.756302 | 2.094744 | 2.094744 | 2.094744 | 2.094744 | 7.039687 | 5.122258 |
| 1638612_at   | CG11142                           | obst-E        | 2.451947 | 2.451947 | 6.177004 | 5.679598 | 5.144427 | 4.827032 | 2.451947 | 2.451947 | 4.295786 | 3.88736  |
| 1623617_at   | ---                               | ---           | 2.094744 | 2.094744 | 5.669869 | 5.471929 | 2.094744 | 2.094744 | 2.094744 | 2.094744 | 2.094754 | 2.094744 |
| 1636818_at   | ---                               | CG13133       | 2.159009 | 2.159009 | 5.730378 | 5.535551 | 2.126877 | 2.126877 | 2.159009 | 2.159009 | 6.451354 | 5.596085 |
| 1633816_at   | ---                               | CG17181       | 3.013511 | 3.056265 | 6.51312  | 6.466884 | 3.006633 | 3.006633 | 3.006633 | 3.006633 | 4.701385 | 3.456071 |
| 1637910_at   | CG30125                           | Ir56a         | 2.094744 | 2.094744 | 5.402644 | 5.694493 | 2.395196 | 2.18285  | 2.094744 | 2.094744 | 2.117827 | 2.138835 |
| 1641071_at   | Incilarin-like                    | CG8343        | 2.094744 | 2.094744 | 5.733276 | 5.355908 | 2.094744 | 2.094744 | 2.094744 | 2.094744 | 5.529757 | 4.228508 |
| 1625701_at   | ---                               | ---           | 2.103408 | 2.106259 | 5.373119 | 5.728845 | 2.103408 | 2.103221 | 2.204106 | 2.76946  | 5.457938 | 3.830698 |
| 1623721_at   | ---                               | ---           | 2.116959 | 2.116959 | 5.818066 | 5.295685 | 2.116959 | 2.116959 | 2.116959 | 2.116959 | 2.116959 | 2.131616 |
| 1636328_at   | ---                               | CG12507       | 2.094744 | 2.094744 | 5.301698 | 5.747989 | 2.358001 | 2.124259 | 2.094744 | 2.094744 | 2.117537 | 2.094744 |
| 1626472_at   | ---                               | CG30340       | 2.094744 | 2.094744 | 5.691114 | 5.319723 | 2.094744 | 2.094744 | 2.094744 | 2.094744 | 5.547019 | 4.330025 |
| 1627607_at   | ---                               | CG4229        | 3.60128  | 3.666787 | 6.876624 | 7.177981 | 3.436231 | 3.437384 | 3.60128  | 3.60128  | 4.794323 | 3.955108 |
| 1630544_at   | ---                               | ---           | 2.199576 | 2.207292 | 5.32302  | 5.861307 | 2.69618  | 2.238749 | 2.197268 | 2.400206 | 3.173988 | 3.306901 |
| 1626437_at   | ---                               | CG42296       | 2.338356 | 2.338356 | 5.602942 | 5.836652 | 2.377554 | 2.338356 | 2.338356 | 2.338356 | 7.300252 | 6.528641 |
| 1639152_at   | Ptp52F                            | Ptp52F        | 2.97422  | 3.202895 | 6.617667 | 6.316227 | 3.797612 | 4.076188 | 3.328001 | 2.656899 | 5.232053 | 4.989625 |
| 1628357_at   | ---                               | CG6142        | 2.54827  | 2.470381 | 5.929763 | 5.842219 | 2.515636 | 2.557028 | 2.54827  | 2.54827  | 2.923561 | 2.549579 |
| 1628265_a_at | CG13719                           | CG42540       | 2.094744 | 2.094744 | 5.435101 | 5.477301 | 2.294151 | 2.303137 | 6.684436 | 6.764043 | 6.134873 | 5.07493  |
| 1628812_at   | ---                               | ---           | 2.152459 | 2.152459 | 5.703774 | 5.306491 | 2.152459 | 2.152459 | 2.152459 | 2.149585 | 2.152459 | 2.147277 |
| 1625007_a_at | stoned /// stoned                 | stnA /// stnB | 2.094744 | 2.094744 | 5.483409 | 5.38455  | 2.094744 | 2.094744 | 2.094744 | 2.094744 | 2.387565 | 3.208635 |
| 1637539_a_at | hibris                            | hbs           | 2.375719 | 2.375403 | 5.609694 | 5.744581 | 2.375561 | 2.375245 | 2.375719 | 2.324482 | 3.791802 | 3.188477 |
| 1638174_at   | ---                               | CG1246        | 3.68005  | 3.705246 | 7.166453 | 6.773355 | 3.750216 | 3.936487 | 3.750216 | 3.773335 | 5.508057 | 5.08377  |
| 1635894_at   | ---                               | CG30148       | 2.387553 | 2.52144  | 5.627645 | 5.815633 | 2.122994 | 2.501614 | 2.354757 | 2.354757 | 6.440103 | 5.995698 |
| 1625498_at   | ---                               | CG13590       | 2.094744 | 2.094744 | 5.592051 | 5.129746 | 2.094744 | 2.094744 | 2.094744 | 2.094744 | 2.224167 | 2.163095 |
| 1635136_at   | ---                               | CG30471       | 2.094744 | 2.094744 | 5.415783 | 5.258615 | 2.094744 | 2.094744 | 2.094744 | 2.094744 | 3.133595 | 3.372079 |
| 1627264_at   | ---                               | ---           | 2.100135 | 2.100135 | 5.278842 | 5.403533 | 2.100135 | 2.100135 | 2.100135 | 2.100135 | 2.111078 | 2.100135 |
| 1629817_at   | ---                               | CG3339        | 2.350787 | 2.447525 | 5.477579 | 5.802536 | 2.98385  | 2.570631 | 2.405976 | 2.359262 | 4.702805 | 3.943547 |
| 1629498_at   | Guanylate cyclase receptor-type   | Gyc32E        | 2.34486  | 2.337074 | 5.760014 | 5.304388 | 3.52602  | 3.582824 | 2.355552 | 2.309182 | 6.436466 | 5.160944 |
| 1624092_at   | Jonah 99C Alpha                   | Jon99Ci       | 2.492511 | 2.342377 | 5.441419 | 5.725987 | 4.15457  | 3.448476 | 2.492511 | 2.31365  | 2.573591 | 2.492511 |
| 1623290_at   | Osiris                            | Osi4          | 2.121053 | 2.099553 | 5.297595 | 5.243509 | 2.379128 | 3.206454 | 2.128204 | 2.146646 | 5.883389 | 4.718593 |
| 1633826_at   | Iris                              | Iris          | 2.094744 | 2.094744 | 5.126893 | 5.335277 | 2.094744 | 2.094744 | 2.094744 | 2.094744 | 3.085673 | 2.095853 |
| 1640771_a_at | ---                               | CG13627       | 2.887452 | 2.889872 | 5.871529 | 6.170768 | 5.04114  | 4.39232  | 2.781582 | 2.885788 | 4.105677 | 2.889872 |
| 1627096_s_at | BTB-protein-III                   | CG16778       | 2.117745 | 2.150019 | 5.560476 | 4.909277 | 2.285285 | 3.47779  | 2.117745 | 2.125874 | 2.171317 | 2.160602 |
| 1637140_at   | ---                               | CG32830       | 3.061405 | 3.048486 | 6.295359 | 6.000857 | 2.170082 | 2.148213 | 2.199203 | 3.107226 | 2.490068 | 2.199203 |

|              |                                   |          |          |          |          |          |          |          |          |          |          |          |          |
|--------------|-----------------------------------|----------|----------|----------|----------|----------|----------|----------|----------|----------|----------|----------|----------|
| 1627130_at   | ---                               | CG7568   | 2.094744 | 2.094744 | 5.294865 | 5.046419 | 2.161869 | 2.094744 | 2.094744 | 2.094744 | 2.094744 | 6.193121 | 5.118976 |
| 1634591_at   | ---                               | CG11878  | 2.107762 | 2.107762 | 4.929999 | 5.404977 | 2.101471 | 2.107762 | 2.107762 | 2.107762 | 2.107762 | 2.096716 | 2.096492 |
| 1625821_at   | ---                               | ---      | 2.134452 | 2.094744 | 5.160173 | 5.167561 | 2.095057 | 2.095057 | 2.095057 | 2.095057 | 2.095057 | 2.095057 | 2.095057 |
| 1637907_at   | ---                               | CG10476  | 2.094744 | 2.094744 | 4.983121 | 5.287509 | 2.094744 | 2.094744 | 2.094744 | 2.094744 | 2.094744 | 2.903766 | 2.123192 |
| 1627964_s_at | ---                               | CG7888   | 2.988921 | 2.966955 | 5.941271 | 6.011918 | 3.175632 | 3.707377 | 2.972304 | 3.143586 | 8.195598 | 7.192424 |          |
| 1628177_at   | juvenile hormone acid methyltra   | jhamt    | 2.094744 | 2.094744 | 5.086829 | 5.063953 | 4.310276 | 4.36935  | 2.140185 | 2.140185 | 5.202738 | 5.211812 |          |
| 1637669_at   | ---                               | CG7442   | 2.101531 | 2.105487 | 4.858764 | 5.271758 | 2.109205 | 2.170947 | 2.107346 | 2.109205 | 7.528186 | 6.691452 |          |
| 1634540_at   | Cyp316a1                          | Cyp316a1 | 2.094744 | 2.103687 | 5.283893 | 4.809889 | 2.395227 | 2.136083 | 2.094744 | 2.094744 | 3.227552 | 3.637723 |          |
| 1627637_at   | ---                               | ---      | 2.311277 | 2.571009 | 5.180994 | 5.53489  | 2.206243 | 2.213505 | 2.222878 | 2.204851 | 6.237493 | 5.32167  |          |
| 1630860_at   | scratch                           | scrt     | 2.094744 | 2.094744 | 4.864023 | 5.086625 | 2.767775 | 3.640659 | 2.094744 | 2.094744 | 6.198502 | 7.253836 |          |
| 1635742_s_at | Cad74A                            | Cad74A   | 3.004666 | 2.966304 | 6.154226 | 5.540384 | 3.42602  | 3.314082 | 2.986279 | 3.065397 | 2.978961 | 2.929117 |          |
| 1633313_at   | ---                               | ---      | 2.136765 | 2.094744 | 4.931822 | 5.003418 | 2.340361 | 2.194086 | 2.094744 | 2.699328 | 2.326381 | 2.487664 |          |
| 1627810_at   | ---                               | ---      | 2.094744 | 2.094744 | 4.811934 | 5.066025 | 2.110201 | 2.104167 | 2.155801 | 2.094744 | 2.094744 | 2.094744 | 2.094744 |
| 1630655_at   | ---                               | CG33159  | 2.094744 | 2.144529 | 5.121537 | 4.801581 | 2.094744 | 2.094744 | 2.147708 | 2.122062 | 2.098676 | 2.094744 |          |
| 1635026_at   | biparous                          | tap      | 2.094744 | 2.094744 | 4.853516 | 5.013702 | 2.440775 | 3.285582 | 2.094744 | 2.094744 | 4.628421 | 4.308391 |          |
| 1625307_at   | sugar transporter 2               | sut2     | 2.105075 | 2.099535 | 4.950608 | 4.928619 | 4.474074 | 4.77102  | 2.098107 | 2.102897 | 3.119581 | 2.636784 |          |
| 1635921_at   | ---                               | CG3502   | 2.360972 | 2.408479 | 4.877112 | 5.563052 | 2.203825 | 2.134731 | 2.13411  | 2.09843  | 5.303956 | 4.582135 |          |
| 1634103_at   | CG15122                           | lr56c    | 2.094744 | 2.094744 | 5.18574  | 4.662608 | 2.094744 | 2.094744 | 2.094744 | 2.094744 | 4.262716 | 3.681623 |          |
| 1633995_at   | ---                               | ---      | 2.536669 | 2.543549 | 5.375767 | 5.309011 | 2.645423 | 2.547236 | 2.460908 | 2.426011 | 5.053278 | 3.72097  |          |
| 1637707_at   | ---                               | CG4009   | 3.239218 | 3.347007 | 6.117328 | 6.051447 | 3.797018 | 3.568109 | 2.301889 | 2.31472  | 3.774469 | 2.678059 |          |
| 1640407_at   | ---                               | CG9897   | 2.094744 | 2.094744 | 4.846844 | 4.906922 | 2.094744 | 2.094744 | 2.217744 | 2.094744 | 3.812307 | 2.192092 |          |
| 1634348_s_at | ---                               | ---      | 2.094744 | 2.094744 | 4.857568 | 4.877491 | 2.094744 | 2.127975 | 2.094744 | 2.094744 | 4.10643  | 3.808804 |          |
| 1628716_at   | ---                               | CG13283  | 2.094744 | 2.094744 | 4.613127 | 5.121292 | 2.511585 | 2.198679 | 2.094744 | 2.094744 | 5.305707 | 4.724432 |          |
| 1626194_at   | melted                            | melt     | 3.207118 | 3.155636 | 5.633375 | 6.252069 | 3.504899 | 4.859697 | 3.207118 | 3.207118 | 6.092339 | 5.180612 |          |
| 1636836_at   | ---                               | CG8568   | 2.49304  | 2.355643 | 5.092702 | 5.240075 | 2.096523 | 2.096523 | 2.16556  | 2.096523 | 4.829139 | 5.580697 |          |
| 1632419_at   | CG17034                           | CG42321  | 2.094744 | 2.094744 | 4.944351 | 4.715696 | 2.094744 | 2.094744 | 2.094744 | 2.094744 | 5.558215 | 4.673881 |          |
| 1624772_at   | ---                               | CG14186  | 2.094744 | 2.206254 | 4.620448 | 5.110993 | 2.094744 | 2.094744 | 2.094744 | 2.094744 | 2.112336 | 2.094744 |          |
| 1626455_s_at | ---                               | CG34005  | 2.110846 | 2.146426 | 4.987802 | 4.697185 | 2.784096 | 2.435966 | 2.137058 | 2.137058 | 4.876718 | 4.841835 |          |
| 1629996_at   | astrocytic leucine-rich repeat mo | CG11910  | 2.094783 | 2.094783 | 4.606493 | 4.981119 | 2.094783 | 2.094783 | 2.094783 | 2.094783 | 2.48254  | 2.131784 |          |
| 1641527_at   | ---                               | CG4576   | 2.094744 | 2.094744 | 4.639268 | 4.851662 | 2.094744 | 2.094744 | 2.094744 | 2.094744 | 5.401404 | 4.500941 |          |
| 1637062_at   | ---                               | CG18745  | 2.420284 | 2.424756 | 5.136583 | 4.960315 | 2.294349 | 2.423226 | 2.424756 | 2.218461 | 6.084799 | 4.821687 |          |
| 1625852_at   | golden goal                       | gogo     | 2.131542 | 2.135042 | 4.836841 | 4.563425 | 2.981922 | 3.889249 | 2.116664 | 2.128062 | 2.561777 | 2.342274 |          |
| 1636659_at   | CG8634                            | Cpr65Ec  | 2.180574 | 2.180574 | 4.453412 | 5.02862  | 2.180574 | 2.180606 | 2.180638 | 2.180574 | 2.240024 | 2.189873 |          |
| 1630727_at   | ---                               | CG5070   | 2.094744 | 2.094744 | 4.453854 | 4.831147 | 2.115815 | 2.094744 | 2.094744 | 2.094744 | 2.406287 | 2.143997 |          |
| 1631123_at   | DCorin                            | Corin    | 2.635239 | 2.38215  | 5.179402 | 4.924913 | 2.834756 | 2.841694 | 2.378861 | 2.657022 | 4.284906 | 3.614569 |          |
| 1638462_at   | ---                               | CG18088  | 2.11789  | 2.100279 | 4.498601 | 4.799071 | 2.2896   | 2.094744 | 2.094744 | 2.094744 | 5.560201 | 5.22783  |          |
| 1625858_at   | ---                               | CG31785  | 3.156233 | 3.374247 | 5.928444 | 5.679129 | 2.978099 | 2.69107  | 3.319635 | 2.949241 | 6.350979 | 4.925009 |          |
| 1640627_at   | dachsous                          | ds       | 2.230708 | 2.23332  | 4.971756 | 4.560265 | 2.303418 | 2.203511 | 2.247767 | 2.367074 | 5.009661 | 4.353792 |          |
| 1639627_at   | ---                               | CG33703  | 2.094744 | 2.094744 | 4.422495 | 4.800605 | 2.47442  | 2.094744 | 2.094744 | 2.094744 | 6.391177 | 5.290029 |          |
| 1637590_at   | CG14343                           | CG42329  | 2.094744 | 2.094744 | 4.438811 | 4.724997 | 2.094744 | 2.094744 | 2.094744 | 2.094744 | 2.682901 | 2.102868 |          |
| 1636897_at   | ---                               | CG33003  | 2.862674 | 2.862674 | 5.219381 | 5.474853 | 2.862674 | 2.862674 | 2.587439 | 2.717365 | 4.055493 | 3.796815 |          |
| 1626950_at   | ---                               | ---      | 2.094744 | 2.094744 | 4.719866 | 4.398573 | 2.094744 | 2.094744 | 2.094744 | 2.094744 | 2.094744 | 2.095504 |          |
| 1625743_at   | beta-carotene dioxygenase         | ninaB    | 3.110133 | 3.365039 | 5.735491 | 5.663077 | 9.158396 | 8.813005 | 3.431451 | 3.351448 | 9.126988 | 9.208682 |          |

|              |                                      |                |          |          |          |          |          |          |          |          |          |          |
|--------------|--------------------------------------|----------------|----------|----------|----------|----------|----------|----------|----------|----------|----------|----------|
| 1630489_at   | ---                                  | CG4116         | 2.094744 | 2.094744 | 4.81886  | 4.270825 | 2.094744 | 2.094744 | 2.094744 | 2.094744 | 2.235787 | 2.142734 |
| 1637986_at   | ---                                  | CG15253        | 2.113364 | 2.113364 | 4.374207 | 4.742154 | 2.467553 | 2.687241 | 2.113364 | 2.113364 | 5.379318 | 3.485227 |
| 1640837_a_at | Ecdysone-inducible gene L1           | ImpL1          | 2.22222  | 2.22222  | 4.768448 | 4.517609 | 2.22222  | 2.22222  | 2.22222  | 2.22222  | 2.149401 | 2.22222  |
| 1623829_at   | ---                                  | CG31414        | 3.027643 | 3.045174 | 5.495247 | 5.408934 | 2.357408 | 3.057312 | 2.981277 | 3.368162 | 3.037079 | 3.076486 |
| 1630621_at   | ---                                  | CG15212        | 2.291699 | 2.255357 | 4.577051 | 4.797687 | 2.253964 | 2.253964 | 2.243639 | 2.250522 | 3.168396 | 3.199441 |
| 1641587_at   | --- /// ---                          | CG14777 /// CG | 2.112468 | 2.112468 | 4.674456 | 4.278422 | 2.112468 | 2.112468 | 2.112468 | 2.112468 | 2.127707 | 2.112468 |
| 1625159_at   | ---                                  | CG18561        | 2.094744 | 2.094744 | 4.392385 | 4.462602 | 2.094744 | 2.094744 | 2.094744 | 2.094744 | 2.094744 | 2.094744 |
| 1630625_s_at | ---                                  | CG33772        | 2.094744 | 2.094744 | 4.351023 | 4.47262  | 2.094744 | 2.094744 | 2.094744 | 2.094744 | 2.165535 | 2.100143 |
| 1636627_at   | CG18554                              | Octbeta3R      | 2.112565 | 2.112565 | 4.312993 | 4.498328 | 2.094744 | 2.112565 | 2.112565 | 2.112565 | 2.11826  | 2.15348  |
| 1626103_at   | Shell-38                             | Cp38           | 2.094744 | 2.094744 | 4.707954 | 4.030537 | 2.094744 | 2.094744 | 2.094744 | 2.094744 | 2.094744 | 2.0954   |
| 1633365_at   | CG7385                               | lr76b          | 2.849794 | 2.921734 | 5.175834 | 5.128856 | 2.401342 | 2.46885  | 2.954071 | 2.954071 | 3.041266 | 2.95464  |
| 1628121_at   | Osiris                               | Osi14          | 2.561491 | 2.431899 | 4.893474 | 4.625403 | 2.628834 | 2.278297 | 2.602109 | 2.591195 | 3.737961 | 3.887261 |
| 1640345_at   | Osiris                               | Osi21          | 2.127982 | 2.127982 | 4.315445 | 4.44513  | 2.127982 | 2.127982 | 2.127982 | 2.127982 | 4.325438 | 3.209712 |
| 1634436_at   | drostatin-C                          | Ast-C          | 2.094744 | 2.165319 | 4.308743 | 4.454569 | 2.165319 | 2.391331 | 2.165319 | 2.094744 | 3.022431 | 2.224955 |
| 1627678_at   | ---                                  | CG18302        | 2.094744 | 2.100879 | 4.371757 | 4.31937  | 2.197057 | 2.370745 | 2.094744 | 2.094744 | 2.103506 | 2.102414 |
| 1638594_at   | Gustatory receptor 28b               | Gr28b          | 2.229949 | 2.229949 | 4.585205 | 4.362246 | 4.654915 | 3.425276 | 2.213051 | 2.213051 | 5.462538 | 4.744723 |
| 1629263_at   | ---                                  | CG13699        | 2.273801 | 2.206983 | 4.52346  | 4.401437 | 6.985923 | 6.370653 | 2.148338 | 2.189949 | 7.304656 | 6.877023 |
| 1631444_a_at | Odorant receptor 35a                 | Or35a          | 2.094744 | 2.094744 | 4.286495 | 4.336159 | 2.094744 | 2.094744 | 2.094744 | 2.094744 | 2.457264 | 2.101717 |
| 1637772_at   | ---                                  | CG4726         | 2.614901 | 2.742458 | 5.016077 | 4.723641 | 2.736591 | 2.702579 | 2.554959 | 2.742458 | 3.243459 | 3.181459 |
| 1638038_at   | ---                                  | CG4335         | 2.094744 | 2.094744 | 4.193798 | 4.356885 | 2.094744 | 2.094744 | 2.094744 | 2.094744 | 5.04193  | 4.440211 |
| 1637486_at   | ---                                  | CG31698        | 2.094744 | 2.094744 | 4.095733 | 4.443756 | 2.094744 | 2.094744 | 2.094744 | 2.094744 | 6.349092 | 5.621589 |
| 1637338_at   | ---                                  | CG12517        | 2.377455 | 2.286762 | 4.602866 | 4.396486 | 2.20024  | 2.16238  | 2.376784 | 2.219033 | 2.206029 | 2.218773 |
| 1626183_at   | ---                                  | CG2083         | 2.485947 | 2.663147 | 4.86754  | 4.599344 | 2.679941 | 2.475681 | 3.433053 | 3.052517 | 2.842046 | 3.316903 |
| 1631332_at   | ---                                  | ---            | 2.094744 | 2.094744 | 4.10599  | 4.400082 | 2.094744 | 2.094744 | 2.094744 | 2.094744 | 2.178183 | 2.107139 |
| 1638633_at   | pickpocket 7                         | ppk7           | 2.094744 | 2.094744 | 4.578457 | 3.921214 | 2.094744 | 2.094744 | 2.094744 | 2.094744 | 3.413021 | 2.386502 |
| 1627128_at   | pickpocket 6                         | ppk6           | 3.21671  | 2.821012 | 5.253716 | 5.079633 | 2.690854 | 2.401273 | 2.873683 | 2.762834 | 4.228866 | 4.111076 |
| 1632257_at   | ---                                  | CG31183        | 3.110935 | 3.110935 | 5.321787 | 5.142291 | 3.162078 | 3.416602 | 3.110935 | 3.110935 | 3.6535   | 3.477651 |
| 1623932_at   | Equilibrative nucleoside transporter | Ent3           | 2.379322 | 2.577488 | 4.839736 | 4.286146 | 4.764306 | 4.552337 | 2.551712 | 2.627078 | 4.746967 | 5.728455 |
| 1631846_at   | ---                                  | CG14857        | 2.265439 | 2.265439 | 4.200756 | 4.294085 | 2.25969  | 2.626039 | 2.265439 | 2.265439 | 3.681124 | 3.353294 |



Additional Data table S5 (separate excel file) List of 680 Kmg bound genes and genomic locations of associated peaks  
 (Questions: Jongmin Kim / devtxn@gmail.com)

- 1 Chr\_peak
- 2 Start\_peak
- 3 end\_peak
- 4 Name\_peak
- 5 q\_value\_peak
- 6 Summit\_position\_of\_peak
- 7 Transcript\_FBtr
- 8 Transcript\_Name
- 9 distance\_btw\_peaksummit\_TSS
- 10 Sprime\_location
- 11 Strand\_transcript

| 1   | 2          | 3        | 4         | 5            | 6          | 7               | 8               | 9        | 10         | 11     |
|-----|------------|----------|-----------|--------------|------------|-----------------|-----------------|----------|------------|--------|
| Chr | Start_peak | end_peak | Name_peak | q_value_peak | Summit_pos | Transcript_FBtr | Transcript_Name | distance | Sprime_loc | Strand |
| 3L  | 3901245    | 3903379  | peak_3228 | 213.31929    | 3901607    | FBtr0073179     | Ubi-p63E-RC     | 443      | 3902050    | -      |
| 2L  | 6801373    | 6802998  | peak_659  | 121.13351    | 6802501    | FBtr0309815     | CG17377-RE      | 288      | 6802789    | -      |
| 2R  | 17245863   | 17247555 | peak_2424 | 111.76088    | 17247060   | FBtr0300762     | CG12699-RB      | 323      | 17247383   | -      |
| 2R  | 23283085   | 23284316 | peak_2811 | 101.58189    | 23283575   | FBtr0343198     | CG3124-RB       | 538      | 23284113   | -      |
| 3L  | 8617001    | 8622483  | peak_3467 | 130.69949    | 8620312    | FBtr0076639     | S-Lap2-RA       | 424      | 8619888    | +      |
| 2R  | 8366225    | 8370086  | peak_1800 | 85.83238     | 8369687    | FBtr0088766     | CG2127-RB       | 351      | 8370038    | -      |
| 3R  | 7362612    | 7367501  | peak_4625 | 96.58733     | 7365404    | FBtr0081586     | Mst84Db-RA      | 223      | 7365627    | -      |
| 3R  | 19180257   | 19180912 | peak_5308 | 74.50422     | 19180613   | FBtr0083735     | CG31475-RA      | 46       | 19180659   | +      |
| 2R  | 13777716   | 13780388 | peak_2186 | 91.65776     | 13779226   | FBtr0087649     | S-Lap7-RA       | 1019     | 13780245   | -      |
| 2L  | 3518080    | 3519908  | peak_452  | 82.9589      | 3519327    | FBtr0077561     | CG3213-RA       | 324      | 3519651    | -      |
| 3R  | 9407937    | 9410419  | peak_4749 | 81.05883     | 9409044    | FBtr0082046     | betaTub85D-RA   | 875      | 9410282    | -      |
| 3R  | 24363062   | 24366032 | peak_5633 | 64.50218     | 24364437   | FBtr0084626     | CG17784-RA      | 543      | 24364980   | -      |
| 3R  | 14096381   | 14098215 | peak_5049 | 69.91098     | 14097824   | FBtr0082917     | CG9920-RA       | 256      | 14098080   | -      |
| 3L  | 4045826    | 4047793  | peak_3240 | 51.5326      | 4046706    | FBtr0073203     | CG1136-RA       | 110      | 4046596    | +      |
| 3R  | 20013754   | 20018077 | peak_5345 | 181.79465    | 20014429   | FBtr0273258     | CG4836-RD       | 303      | 20014126   | +      |
| 2R  | 19545175   | 19547313 | peak_2609 | 60.08994     | 19546697   | FBtr0304653     | sm-RJ           | 374      | 19547071   | -      |
| 2R  | 16534784   | 16537257 | peak_2373 | 182.94173    | 16535375   | FBtr0087092     | loopin-1-RA     | 432      | 16534943   | +      |
| 3R  | 23698470   | 23700497 | peak_5544 | 51.5326      | 23700104   | FBtr0334769     | CG31468-RB      | 250      | 23700354   | -      |
| 2L  | 10056813   | 10060621 | peak_844  | 137.16919    | 10057317   | FBtr0079937     | Pen-RA          | 417      | 10056900   | +      |
| 2L  | 5923073    | 5923863  | peak_580  | 52.37142     | 5923389    | FBtr0079151     | CG9016-RA       | 264      | 5923653    | -      |
| 3L  | 9413784    | 9417582  | peak_3526 | 39.42852     | 9417184    | FBtr0076485     | CG3982-RA       | 204      | 9417388    | -      |
| 2L  | 13210557   | 13212085 | peak_1061 | 38.65546     | 13211712   | FBtr0080487     | CG15482-RA      | 102      | 13211814   | -      |
| 3L  | 1756038    | 1757109  | peak_3083 | 40.20609     | 1756235    | FBtr0334074     | CG8001-RD       | 71       | 1756306    | +      |
| 3L  | 14217956   | 14220378 | peak_3792 | 32.64424     | 14219731   | FBtr0100043     | nuf-RE          | 11       | 14219742   | +      |

|    |          |          |           |           |          |             |                 |      |          |   |
|----|----------|----------|-----------|-----------|----------|-------------|-----------------|------|----------|---|
| Y  | 3264979  | 3265809  | peak_6270 | 33.37759  | 3265355  | FBtr0114088 | CG41423-RA      | 79   | 3265434  | + |
| 2L | 19181209 | 19183774 | peak_1345 | 45.76664  | 19182389 | FBtr0302890 | CG42688-RA      | 259  | 19182648 | - |
| 2L | 16133434 | 16135340 | peak_1173 | 33.37759  | 16134908 | FBtr0112359 | CG34168-RA      | 364  | 16135272 | - |
| 2R | 19220176 | 19221751 | peak_2559 | 12.67755  | 19220532 | FBtr0086505 | CG7137-RA       | 6812 | 19227344 | + |
| 3L | 9376253  | 9377641  | peak_3511 | 38.65546  | 9377086  | FBtr0076496 | Hsp26-RA        | 289  | 9377375  | - |
| 2L | 22104877 | 22105605 | peak_1483 | 30.47042  | 22105227 | FBtr0085944 | CG15219-RA      | 285  | 22105512 | - |
| 3R | 23693749 | 23696548 | peak_5543 | 38.65546  | 23695976 | FBtr0084475 | CG10252-RA      | 269  | 23696245 | - |
| 3R | 5274753  | 5277973  | peak_4484 | 35.60972  | 5277508  | FBtr0078819 | CG31538-RA      | 327  | 5277835  | - |
| 2R | 25129269 | 25130667 | peak_2947 | 46.57809  | 25129698 | FBtr0343513 | CG30430-RB      | 239  | 25129459 | + |
| 3L | 3192849  | 3197799  | peak_3177 | 34.86029  | 3193947  | FBtr0073040 | Hsp83-RA        | 731  | 3193216  | + |
| 3R | 28291214 | 28293156 | peak_5803 | 164.75983 | 28291643 | FBtr0085277 | Mst98Ca-RA      | 305  | 28291338 | + |
| 2R | 12303857 | 12306262 | peak_2063 | 34.1165   | 12305807 | FBtr0089668 | SIP2-RG         | 462  | 12306269 | - |
| 2R | 19725139 | 19726363 | peak_2626 | 24.90064  | 19725878 | FBtr0086331 | tRNA:CR30218-RA | 27   | 19725905 | + |
| 3R | 7086207  | 7089740  | peak_4608 | 50.69706  | 7087338  | FBtr0081639 | alphaTub84B-RA  | 739  | 7086599  | + |
| 3R | 13826034 | 13827843 | peak_5027 | 30.47042  | 13827401 | FBtr0082884 | Mst87F-RA       | 285  | 13827686 | - |
| 3R | 23889501 | 23893837 | peak_5569 | 40.20609  | 23893265 | FBtr0084525 | tbrd-1-RA       | 118  | 23893383 | - |
| 3R | 22491741 | 22493600 | peak_5493 | 44.15776  | 22491970 | FBtr0084258 | CG7045-RA       | 141  | 22491829 | + |
| 2R | 14663511 | 14666944 | peak_2262 | 49.03657  | 14665167 | FBtr0087481 | CG12861-RA      | 189  | 14665356 | - |
| 3R | 9677543  | 9678759  | peak_4785 | 29.04851  | 9677906  | FBtr0308353 | CG16817-RB      | 21   | 9677927  | + |
| 3R | 18850265 | 18851926 | peak_5289 | 42.56455  | 18851602 | FBtr0083675 | CG31226-RA      | 196  | 18851798 | - |
| 2R | 15229570 | 15230219 | peak_2297 | 13.22238  | 15230094 | FBtr0340008 | CR44370-RA      | 3156 | 15226938 | + |
| 2L | 18256312 | 18258059 | peak_1289 | 29.75709  | 18257768 | FBtr0081056 | CG31788-RA      | 134  | 18257902 | - |
| 2L | 16004331 | 16005432 | peak_1170 | 48.2129   | 16004822 | FBtr0346121 | CG13245-RC      | 144  | 16004966 | + |
| 2R | 22593946 | 22595327 | peak_2758 | 24.90064  | 22594877 | FBtr0071853 | CG3927-RA       | 200  | 22594677 | + |
| 3R | 9763340  | 9764764  | peak_4795 | 21.60102  | 9763646  | FBtr0082133 | CG8478-RB       | 4    | 9763650  | + |
| 2L | 2492604  | 2493981  | peak_369  | 17.24148  | 2493034  | FBtr0077779 | oaf-RC          | 79   | 2492955  | + |
| 2R | 8078909  | 8080237  | peak_1771 | 28.34433  | 8079835  | FBtr0310370 | Vps28-RB        | 206  | 8080041  | - |
| 2R | 19726483 | 19727525 | peak_2627 | 16.05663  | 19726795 | FBtr0086448 | tRNA:E4:56Fc-RA | 582  | 19726213 | - |
| 3L | 4100989  | 4102597  | peak_3251 | 29.75709  | 4102263  | FBtr0073273 | CG14995-RD      | 121  | 4102384  | - |
| 3R | 10349933 | 10350591 | peak_4860 | 23.56257  | 10350116 | FBtr0082237 | jumu-RA         | 66   | 10350182 | + |
| 3L | 11122949 | 11123663 | peak_3628 | 17.24148  | 11123303 | FBtr0301438 | CG42575-RA      | 45   | 11123348 | + |
| 3R | 4402841  | 4403986  | peak_4418 | 17.24148  | 4403057  | FBtr0078921 | lost-RA         | 19   | 4403076  | + |
| 2R | 23553391 | 23554830 | peak_2825 | 19.69469  | 23554323 | FBtr0072112 | pita-RA         | 389  | 23554712 | - |
| 3R | 24106927 | 24107591 | peak_5597 | 14.90051  | 24107441 | FBtr0084542 | CG10694-RA      | 50   | 24107391 | + |
| 2R | 19259753 | 19261333 | peak_2569 | 35.60972  | 19260335 | FBtr0086511 | CG7229-RA       | 426  | 19259909 | + |
| 3L | 19641750 | 19642965 | peak_4104 | 23.56257  | 19642469 | FBtr0331862 | CG8786-RG       | 347  | 19642816 | - |
| 2L | 19370331 | 19370722 | peak_1348 | 17.24148  | 19370528 | FBtr0081198 | CG17349-RA      | 83   | 19370445 | + |
| 3R | 30036296 | 30038953 | peak_5880 | 49.03657  | 30036695 | FBtr0085600 | CG7928-RA       | 175  | 30036870 | - |
| 2R | 19060946 | 19061909 | peak_2552 | 20.32366  | 19061277 | FBtr0299568 | CG15109-RE      | 1856 | 19059421 | + |
| 2R | 21803358 | 21805117 | peak_2719 | 19.69469  | 21804485 | FBtr0344884 | CR9284-RE       | 1083 | 21803402 | + |
| 3R | 9774907  | 9775640  | peak_4801 | 14.90051  | 9775161  | FBtr0082135 | topi-RA         | 40   | 9775121  | + |

|    |          |          |           |          |          |             |                |      |          |   |
|----|----------|----------|-----------|----------|----------|-------------|----------------|------|----------|---|
| 3L | 3224596  | 3226327  | peak_3182 | 17.24148 | 3224926  | FBtr0073045 | CG11505-RA     | 88   | 3224838  | + |
| 2L | 2415800  | 2416911  | peak_367  | 20.95932 | 2416497  | FBtr0077788 | CG31948-RA     | 159  | 2416656  | - |
| 2L | 728310   | 728926   | peak_275  | 19.69469 | 728613   | FBtr0078000 | Hsp60B-RA      | 251  | 728362   | + |
| 2L | 2769968  | 2770724  | peak_390  | 14.90051 | 2770253  | FBtr0077719 | CG2862-RB      | 59   | 2770194  | + |
| 3L | 21536768 | 21537369 | peak_4234 | 17.24148 | 21537065 | FBtr0333453 | Rpn10-RB       | 1    | 21537066 | + |
| 3L | 8943215  | 8945111  | peak_3484 | 21.60102 | 8944289  | FBtr0331511 | orb2-RA        | 604  | 8944893  | - |
| 3R | 18287944 | 18289028 | peak_5267 | 26.26251 | 18288635 | FBtr0083597 | CG7131-RA      | 142  | 18288777 | - |
| 3L | 300343   | 300760   | peak_2994 | 13.77455 | 300551   | FBtr0333955 | RhoGEF3-RB     | 19   | 300570   | + |
| 3R | 5240177  | 5240788  | peak_4471 | 31.18979 | 5240517  | FBtr0078824 | CG33293-RA     | 218  | 5240735  | - |
| 3L | 9684815  | 9685426  | peak_3554 | 16.05663 | 9685143  | FBtr0076394 | CG16719-RA     | 28   | 9685171  | + |
| 2R | 13430741 | 13432829 | peak_2154 | 16.05663 | 13431762 | FBtr0087660 | tRNA:I:49Fd-RA | 15   | 13431777 | + |
| 2L | 3042741  | 3043451  | peak_416  | 16.05663 | 3042959  | FBtr0077656 | CG17261-RA     | 40   | 3042919  | + |
| 2L | 9887721  | 9888326  | peak_837  | 13.77455 | 9887970  | FBtr0342837 | FKBP59-RB      | 35   | 9888005  | + |
| 2L | 3163523  | 3163858  | peak_430  | 14.90051 | 3163659  | FBtr0332371 | Hydr2-RC       | 14   | 3163645  | + |
| 2R | 22060698 | 22061891 | peak_2731 | 24.90064 | 22061135 | FBtr0339099 | Snp-RD         | 185  | 22060950 | + |
| 3L | 21824569 | 21825912 | peak_4259 | 16.64565 | 21824751 | FBtr0303245 | CG7414-RC      | 11   | 21824740 | + |
| 3L | 1555542  | 1556211  | peak_3064 | 10.08448 | 1555955  | FBtr0072743 | Pex10-RA       | 2273 | 1558228  | + |
| 2R | 7386857  | 7387972  | peak_1694 | 20.32366 | 7387346  | FBtr0336909 | CG11107-RB     | 22   | 7387324  | + |
| 2R | 13222136 | 13222705 | peak_2140 | 19.07141 | 13222419 | FBtr0087740 | Dp-RA          | 14   | 13222433 | + |
| 2R | 19341565 | 19342873 | peak_2574 | 14.90051 | 19341761 | FBtr0304055 | CG9975-RB      | 48   | 19341809 | + |
| 3R | 11244090 | 11244555 | peak_4892 | 15.4749  | 11244249 | FBtr0082358 | CG5214-RA      | 53   | 11244302 | + |
| 2L | 18453976 | 18455133 | peak_1300 | 18.45464 | 18454631 | FBtr0081063 | Ntf-2r-RA      | 18   | 18454649 | + |
| 3R | 10224610 | 10225074 | peak_4843 | 19.07141 | 10224873 | FBtr0110787 | CG34107-RA     | 36   | 10224909 | + |
| 3R | 10109130 | 10110395 | peak_4836 | 21.60102 | 10110050 | FBtr0347104 | Fmr1-RJ        | 65   | 10109985 | - |
| 3L | 4283671  | 4284887  | peak_3264 | 19.07141 | 4283999  | FBtr0073233 | CG1316-RA      | 148  | 4283851  | + |
| 3L | 18041199 | 18043188 | peak_4027 | 17.84423 | 18042729 | FBtr0300044 | CG42393-RA     | 4    | 18042733 | + |
| 3R | 19921195 | 19921575 | peak_5343 | 13.22238 | 19921382 | FBtr0347246 | CR46040-RA     | 69   | 19921313 | + |
| 3L | 15471624 | 15472212 | peak_3839 | 12.14226 | 15471806 | FBtr0332815 | CG7804-RB      | 2304 | 15474110 | - |
| 3R | 17682133 | 17683486 | peak_5238 | 15.4749  | 17682651 | FBtr0083479 | CG7655-RA      | 18   | 17682669 | + |
| 3R | 10000540 | 10002109 | peak_4819 | 17.24148 | 10001236 | FBtr0082215 | CG5359-RA      | 40   | 10001276 | - |
| 2R | 10354450 | 10356181 | peak_1946 | 46.57809 | 10355473 | FBtr0305905 | CG12902-RC     | 86   | 10355387 | - |
| 2L | 294926   | 295512   | peak_252  | 15.4749  | 295102   | FBtr0078131 | Hop-RA         | 20   | 295122   | + |
| 2R | 17539012 | 17539467 | peak_2441 | 13.22238 | 17539250 | FBtr0307337 | CG43370-RD     | 72   | 17539322 | + |
| 3R | 5467594  | 5468216  | peak_4500 | 12.14226 | 5467787  | FBtr0078680 | CG12162-RA     | 9    | 5467778  | + |
| 2R | 16598528 | 16600136 | peak_2379 | 17.84423 | 16598934 | FBtr0087107 | CG5089-RA      | 186  | 16598748 | + |
| 2L | 5981619  | 5984752  | peak_587  | 24.22873 | 5982651  | FBtr0079177 | eIF-4a-RB      | 57   | 5982594  | + |
| 3L | 6983023  | 6983630  | peak_3355 | 13.22238 | 6983183  | FBtr0309074 | CG43439-RA     | 1403 | 6984586  | - |
| 2R | 9692266  | 9693160  | peak_1881 | 16.05663 | 9692794  | FBtr0088499 | Uba1-RA        | 534  | 9693328  | - |
| 2L | 13305389 | 13306981 | peak_1076 | 23.56257 | 13306463 | FBtr0331506 | CG43779-RA     | 292  | 13306755 | - |
| 2L | 1026474  | 1027063  | peak_289  | 24.90064 | 1026841  | FBtr0077997 | CG4375-RA      | 56   | 1026897  | - |
| 3R | 9764881  | 9765391  | peak_4796 | 10.08448 | 9765048  | FBtr0301871 | CG8478-RD      | 1294 | 9763754  | + |

|    |          |          |           |          |          |             |                 |      |          |   |
|----|----------|----------|-----------|----------|----------|-------------|-----------------|------|----------|---|
| 2R | 8262888  | 8264581  | peak_1792 | 16.05663 | 8264225  | FBtr0088800 | CG30376-RA      | 201  | 8264426  | - |
| 2L | 14598644 | 14599783 | peak_1133 | 21.60102 | 14599391 | FBtr0080660 | tRNA:P:35Bb-RA  | 76   | 14599467 | - |
| 3R | 30808369 | 30808897 | peak_5916 | 11.61518 | 30808619 | FBtr0310068 | cindr-RE        | 2    | 30808617 | + |
| 3L | 13111111 | 1315876  | peak_3040 | 15.4749  | 1313733  | FBtr0072670 | CG9153-RB       | 37   | 1313696  | + |
| 3L | 1478284  | 1479002  | peak_3049 | 18.45464 | 1478698  | FBtr0072713 | stet-RA         | 243  | 1478941  | - |
| 3R | 25792685 | 25793382 | peak_5720 | 11.61518 | 25792939 | FBtr0309989 | CR43632-RA      | 364  | 25793303 | - |
| 2R | 20319044 | 20319569 | peak_2637 | 15.4749  | 20319241 | FBtr0301207 | CG8920-RD       | 61   | 20319180 | + |
| 2R | 20669505 | 20671132 | peak_2657 | 19.07141 | 20670831 | FBtr0302285 | exu-RD          | 70   | 20670761 | - |
| 3R | 9509181  | 9510632  | peak_4759 | 14.90051 | 9509891  | FBtr0082123 | rump-RA         | 433  | 9510324  | - |
| 3R | 26452530 | 26452926 | peak_5746 | 19.69469 | 26452702 | FBtr0330152 | CG5447-RB       | 168  | 26452534 | + |
| 2R | 24472557 | 24473672 | peak_2897 | 10.08448 | 24472852 | FBtr0072294 | CG3492-RA       | 140  | 24472712 | + |
| 3R | 14641917 | 14642742 | peak_5079 | 15.4749  | 14642332 | FBtr0082976 | CG7886-RA       | 231  | 14642563 | - |
| 3L | 9729857  | 9731210  | peak_3569 | 17.84423 | 9730381  | FBtr0076405 | ATPsyn-b-RA     | 382  | 9729999  | + |
| 3R | 23818237 | 23819119 | peak_5557 | 30.47042 | 23818719 | FBtr0084530 | CG33111-RB      | 50   | 23818769 | - |
| 3R | 20789498 | 20790979 | peak_5381 | 17.24148 | 20790448 | FBtr0083962 | Syp-RD          | 462  | 20789986 | + |
| 3L | 13389112 | 13390177 | peak_3765 | 16.05663 | 13389479 | FBtr0321318 | Poc1-RB         | 527  | 13390006 | - |
| 2L | 11517105 | 11517591 | peak_961  | 46.57809 | 11517300 | FBtr0080239 | CG4970-RB       | 91   | 11517391 | + |
| 2R | 11970500 | 11971255 | peak_2035 | 14.3338  | 11970632 | FBtr0088041 | ADD1-RB         | 54   | 11970686 | + |
| 2R | 16730516 | 16731401 | peak_2385 | 23.56257 | 16731052 | FBtr0113380 | CG30463-RD      | 332  | 16731384 | - |
| 2R | 18139823 | 18140499 | peak_2492 | 16.64565 | 18140035 | FBtr0086736 | pAbp-RC         | 43   | 18140078 | + |
| 3R | 24054751 | 24057430 | peak_5594 | 17.84423 | 24056682 | FBtr0084589 | Hsp68-RA        | 628  | 24057310 | - |
| 2R | 10725141 | 10725875 | peak_1966 | 15.4749  | 10725328 | FBtr0088215 | CG12309-RA      | 58   | 10725270 | + |
| 2R | 14668221 | 14668934 | peak_2263 | 12.14226 | 14668482 | FBtr0300765 | CG12866-RC      | 34   | 14668448 | + |
| 3R | 24279332 | 24279998 | peak_5624 | 10.58593 | 24279483 | FBtr0084600 | CG13611-RA      | 89   | 24279572 | + |
| 2L | 5387322  | 5387667  | peak_545  | 11.09627 | 5387475  | FBtr0342942 | CR44745-RA      | 76   | 5387551  | + |
| 3L | 14036490 | 14038655 | peak_3783 | 13.77455 | 14037228 | FBtr0075773 | Hsc70Cb-RC      | 27   | 14037255 | + |
| 2R | 12593276 | 12593989 | peak_2097 | 10.08448 | 12593529 | FBtr0333099 | Amph-RB         | 75   | 12593604 | + |
| 3R | 13309084 | 13309480 | peak_4998 | 11.09627 | 13309280 | FBtr0082744 | CG32473-RB      | 106  | 13309386 | + |
| 2R | 23072123 | 23072799 | peak_2792 | 11.61518 | 23072481 | FBtr0071962 | tRNA:CR30202-RA | 100  | 23072581 | + |
| 3R | 12447480 | 12450526 | peak_4957 | 26.26251 | 12447809 | FBtr0082631 | CG5538-RA       | 156  | 12447653 | + |
| 2L | 1586174  | 1587322  | peak_305  | 20.95932 | 1587022  | FBtr0077917 | CG10869-RA      | 133  | 1587155  | - |
| 2R | 8370940  | 8373092  | peak_1801 | 76.36089 | 8371365  | FBtr0088740 | CG8701-RA       | 292  | 8371073  | + |
| 2L | 3357539  | 3358034  | peak_437  | 12.14226 | 3357689  | FBtr0077588 | CG8838-RA       | 43   | 3357646  | + |
| 2R | 17766635 | 17767959 | peak_2477 | 19.69469 | 17766922 | FBtr0340275 | CR44416-RA      | 24   | 17766946 | + |
| 3L | 21728477 | 21729043 | peak_4255 | 12.67755 | 21728870 | FBtr0078432 | Rpb8-RA         | 62   | 21728932 | + |
| 2L | 12398159 | 12398788 | peak_1002 | 35.60972 | 12398411 | FBtr0080365 | Pkd2-RA         | 137  | 12398274 | + |
| 2L | 17434787 | 17435523 | peak_1262 | 10.08448 | 17434994 | FBtr0080980 | CG5043-RA       | 1132 | 17433862 | + |
| 3L | 15161560 | 15162109 | peak_3834 | 13.22238 | 15161857 | FBtr0075643 | CG6878-RA       | 40   | 15161817 | + |
| 2L | 1344290  | 1344757  | peak_304  | 14.90051 | 1344476  | FBtr0077924 | Cdlc2-RA        | 15   | 1344461  | + |
| 3R | 31980749 | 31981430 | peak_6020 | 78.23039 | 31980977 | FBtr0306693 | heph-RY         | 192  | 31981169 | - |
| 3R | 30039550 | 30039894 | peak_5882 | 24.90064 | 30039721 | FBtr0346862 | Sry-alpha-RB    | 2    | 30039719 | + |

|    |          |          |           |          |          |             |                 |     |          |   |
|----|----------|----------|-----------|----------|----------|-------------|-----------------|-----|----------|---|
| 3L | 7360423  | 7363518  | peak_3373 | 15.4749  | 7360668  | FBtr0076847 | Sec63-RA        | 107 | 7360561  | + |
| 2R | 14602876 | 14604403 | peak_2252 | 19.07141 | 14603339 | FBtr0089615 | tra2-RD         | 527 | 14603866 | - |
| 3R | 26875256 | 26876454 | peak_5759 | 17.84423 | 26875971 | FBtr0085063 | ms (3) K81-RA   | 119 | 26875852 | + |
| 3L | 8108987  | 8110555  | peak_3430 | 17.24148 | 8109201  | FBtr0076683 | fan-RA          | 69  | 8109132  | + |
| 2L | 2976107  | 2977122  | peak_410  | 21.60102 | 2976905  | FBtr0077676 | CG9641-RA       | 43  | 2976862  | - |
| 3L | 22867285 | 22868369 | peak_4300 | 15.4749  | 22867761 | FBtr0347060 | CG11137-RB      | 482 | 22868243 | - |
| 2L | 2414495  | 2415644  | peak_366  | 20.95932 | 2415154  | FBtr0307079 | CG18641-RC      | 168 | 2415322  | - |
| 3R | 24925106 | 24925815 | peak_5676 | 13.22238 | 24925492 | FBtr0337011 | Trf4-2-RB       | 66  | 24925426 | + |
| 2L | 6062593  | 6063499  | peak_596  | 13.22238 | 6063060  | FBtr0343122 | CG13994-RB      | 71  | 6062989  | + |
| 3R | 14326753 | 14327917 | peak_5058 | 14.90051 | 14327151 | FBtr0082931 | CG3321-RA       | 83  | 14327068 | + |
| 2L | 7257365  | 7257629  | peak_705  | 12.14226 | 7257466  | FBtr0300460 | CG31909-RC      | 46  | 7257512  | + |
| 3R | 5370059  | 5370860  | peak_4494 | 12.67755 | 5370240  | FBtr0346517 | CG34277-RE      | 64  | 5370304  | + |
| 2R | 25076109 | 25077570 | peak_2945 | 11.09627 | 25076687 | FBtr0072446 | tRNA:CR30199-RA | 78  | 25076765 | + |
| 3L | 22865160 | 22865700 | peak_4299 | 15.4749  | 22865457 | FBtr0089836 | CG33170-RA      | 29  | 22865486 | + |
| 2R | 13596558 | 13596967 | peak_2177 | 12.67755 | 13596806 | FBtr0087624 | S-Lap5-RA       | 129 | 13596677 | + |
| 3L | 14684626 | 14684633 | peak_3808 | 12.14226 | 14684827 | FBtr0075684 | CG5048-RA       | 59  | 14684768 | + |
| 3R | 31985053 | 31985920 | peak_6022 | 11.09627 | 31985369 | FBtr0112866 | heph-RN         | 399 | 31985768 | - |
| 3R | 21867623 | 21868626 | peak_5461 | 10.58593 | 21868005 | FBtr0336880 | Cby-RD          | 2   | 21868003 | + |
| 2L | 18008049 | 18010726 | peak_1280 | 60.08994 | 18009389 | FBtr0081028 | CG31740-RA      | 436 | 18008953 | + |
| 3L | 17514072 | 17514901 | peak_3991 | 13.22238 | 17514537 | FBtr0075175 | CG7564-RA       | 239 | 17514298 | + |
| 2R | 8122715  | 8123321  | peak_1779 | 10.58593 | 8123068  | FBtr0088783 | Nup50-RA        | 32  | 8123036  | + |
| 2R | 15381271 | 15381903 | peak_2307 | 11.09627 | 15381447 | FBtr0087384 | SRPK-RB         | 2   | 15381449 | + |
| 2L | 6071835  | 6072389  | peak_604  | 10.58593 | 6072136  | FBtr0302212 | Kr-h2-RB        | 77  | 6072213  | + |
| 3L | 4173731  | 4174140  | peak_3257 | 10.58593 | 4173877  | FBtr0073218 | CG18675-RA      | 7   | 4173884  | + |
| 3L | 5751182  | 5752554  | peak_3305 | 13.77455 | 5751540  | FBtr0077123 | DnaJ-1-RA       | 649 | 5752189  | - |
| 3R | 5627522  | 5627956  | peak_4527 | 12.67755 | 5627757  | FBtr0078706 | CG31551-RA      | 95  | 5627852  | + |
| 3R | 15244065 | 15245899 | peak_5118 | 19.69469 | 15244578 | FBtr0083056 | Hsc70-4-RF      | 322 | 15244256 | + |
| 3L | 4069131  | 4070149  | peak_3242 | 13.77455 | 4069402  | FBtr0300989 | CG32259-RD      | 33  | 4069369  | + |
| 3L | 19914834 | 19915649 | peak_4134 | 12.67755 | 19915007 | FBtr0074893 | Rpn1-RA         | 44  | 19915051 | + |
| 3L | 10048215 | 10048450 | peak_3583 | 10.08448 | 10048350 | FBtr0346943 | CR45878-RA      | 48  | 10048302 | + |
| 2R | 20666150 | 20668419 | peak_2655 | 22.24879 | 20667016 | FBtr0086245 | Fem-1-RA        | 290 | 20667306 | - |
| 2L | 5243078  | 5244202  | peak_533  | 14.3338  | 5243409  | FBtr0079087 | tkv-RC          | 730 | 5244139  | - |
| 3R | 20890640 | 20891417 | peak_5401 | 11.09627 | 20891117 | FBtr0083976 | tRNA:CR31334-RA | 5   | 20891122 | + |
| 3L | 1251924  | 1255340  | peak_3034 | 23.56257 | 1254128  | FBtr0100645 | CG9133-RB       | 275 | 1253853  | + |
| 2L | 849577   | 851226   | peak_280  | 36.36405 | 850246   | FBtr0334793 | CR44060-RA      | 456 | 850702   | + |
| 3L | 9854492  | 9855263  | peak_3575 | 16.05663 | 9854817  | FBtr0076368 | RasGAP1-RB      | 468 | 9855285  | - |
| 3R | 30127986 | 30130002 | peak_5890 | 22.90261 | 30128937 | FBtr0085586 | Ppil-RB         | 182 | 30129119 | - |
| 3L | 1864682  | 1865667  | peak_3095 | 11.61518 | 1865522  | FBtr0072834 | CG12025-RA      | 92  | 1865430  | + |
| 3L | 17849561 | 17850132 | peak_4014 | 10.58593 | 17849751 | FBtr0331811 | CG7441-RB       | 24  | 17849727 | + |
| 3R | 4426886  | 4429939  | peak_4422 | 32.64424 | 4429347  | FBtr0078946 | srl-RB          | 12  | 4429335  | - |
| 3R | 23752249 | 23753207 | peak_5550 | 20.95932 | 23752836 | FBtr0335003 | RanBP3-RB       | 2   | 23752834 | - |

|    |          |          |           |          |          |             |               |      |          |   |
|----|----------|----------|-----------|----------|----------|-------------|---------------|------|----------|---|
| 3R | 22212018 | 22212419 | peak_5476 | 11.09627 | 22212167 | FBtr0305038 | Gld2-RB       | 25   | 22212192 | + |
| 3L | 22329565 | 22330088 | peak_4274 | 14.3338  | 22329705 | FBtr0078501 | CG32450-RA    | 73   | 22329778 | + |
| 3R | 30133721 | 30135104 | peak_5893 | 14.3338  | 30134426 | FBtr0085584 | Tpi-RC        | 117  | 30134309 | - |
| 2L | 4149120  | 4150065  | peak_464  | 15.4749  | 4149370  | FBtr0077468 | CG2955-RA     | 91   | 4149279  | + |
| 2L | 1980666  | 1981558  | peak_324  | 13.22238 | 1981263  | FBtr0077814 | CG15362-RA    | 87   | 1981176  | + |
| 3R | 22587645 | 22588077 | peak_5502 | 12.14226 | 22587860 | FBtr0113395 | Efa6-RC       | 105  | 22587755 | + |
| 3R | 26947528 | 26948559 | peak_5764 | 11.61518 | 26947916 | FBtr0085068 | CG18472-RA    | 48   | 26947868 | + |
| 2R | 14235038 | 14235534 | peak_2227 | 13.22238 | 14235202 | FBtr0339759 | Opa1-RC       | 247  | 14235449 | - |
| 3L | 3892126  | 3893355  | peak_3223 | 17.84423 | 3893193  | FBtr0333140 | Fie-RB        | 462  | 3892731  | + |
| 2R | 21669690 | 21670601 | peak_2711 | 15.4749  | 21670190 | FBtr0071666 | NC2alpha-RA   | 38   | 21670152 | + |
| 2L | 15113320 | 15114026 | peak_1152 | 11.09627 | 15113544 | FBtr0080705 | stc-RB        | 64   | 15113480 | + |
| 3R | 25959268 | 25959512 | peak_5729 | 10.58593 | 25959324 | FBtr0084948 | CG14540-RA    | 45   | 25959279 | + |
| 3R | 13661097 | 13661593 | peak_5012 | 12.14226 | 13661356 | FBtr0308195 | B52-RM        | 45   | 13661311 | + |
| 3R | 15972487 | 15973738 | peak_5158 | 11.61518 | 15973189 | FBtr0301715 | Hel189B-RB    | 109  | 15973298 | + |
| 2L | 21200097 | 21202900 | peak_1443 | 42.56455 | 21201951 | FBtr0081490 | CG31988-RA    | 758  | 21202709 | - |
| X  | 20735297 | 20735705 | peak_6211 | 10.08448 | 20735539 | FBtr0346615 | CG1324-RC     | 421  | 20735960 | - |
| 2L | 17500135 | 17500953 | peak_1272 | 16.05663 | 17500754 | FBtr0080994 | CG6412-RA     | 352  | 17501106 | - |
| 2L | 14338120 | 14338443 | peak_1115 | 10.58593 | 14338283 | FBtr0343676 | CG15286-RB    | 43   | 14338240 | + |
| 3R | 11553952 | 11554285 | peak_4899 | 10.58593 | 11554124 | FBtr0082409 | CG14708-RA    | 21   | 11554145 | + |
| 3L | 21639195 | 21639722 | peak_4251 | 10.08448 | 21639377 | FBtr0078425 | CG32445-RA    | 18   | 21639359 | + |
| 2L | 6498305  | 6498911  | peak_636  | 10.58593 | 6498535  | FBtr0343155 | CG31637-RB    | 112  | 6498647  | + |
| 2R | 22660346 | 22660920 | peak_2770 | 12.67755 | 22660607 | FBtr0301269 | CG42565-RA    | 124  | 22660483 | + |
| 2R | 16607455 | 16607822 | peak_2383 | 19.07141 | 16607644 | FBtr0087108 | CG5065-RA     | 10   | 16607654 | + |
| 2L | 10651465 | 10651881 | peak_913  | 10.58593 | 10651706 | FBtr0080103 | CG17098-RA    | 93   | 10651613 | + |
| 2R | 19713958 | 19714528 | peak_2623 | 19.07141 | 19714174 | FBtr0086329 | CG8517-RA     | 98   | 19714076 | + |
| 2L | 6120549  | 6121264  | peak_613  | 14.3338  | 6121027  | FBtr0304908 | stai-RD       | 353  | 6120674  | + |
| 3L | 13025684 | 13026484 | peak_3747 | 31.18979 | 13026296 | FBtr0075894 | Zmynd10-RA    | 141  | 13026437 | - |
| 3R | 24661303 | 24661956 | peak_5658 | 19.69469 | 24661757 | FBtr0084664 | Ppox-RA       | 94   | 24661851 | - |
| 3R | 13382005 | 13384152 | peak_5000 | 13.77455 | 13383730 | FBtr0082754 | Droj2-RD      | 396  | 13383334 | + |
| 2R | 10819792 | 10820215 | peak_1977 | 10.58593 | 10819944 | FBtr0088224 | Prosbeta5-RB  | 34   | 10819978 | + |
| 2R | 6992419  | 6994022  | peak_1684 | 19.69469 | 6992812  | FBtr0089760 | CG30159-RB    | 108  | 6992920  | + |
| 2L | 14355007 | 14355457 | peak_1118 | 11.61518 | 14355151 | FBtr0080626 | Rab14-RA      | 6    | 14355145 | + |
| 2R | 16866908 | 16867691 | peak_2402 | 10.08448 | 16867436 | FBtr0087073 | Psi-RA        | 278  | 16867714 | - |
| 3L | 14537380 | 14537983 | peak_3802 | 13.22238 | 14537818 | FBtr0075719 | Mpcp-RB       | 92   | 14537726 | + |
| 3R | 27947499 | 27948064 | peak_5799 | 13.77455 | 27947876 | FBtr0085266 | mfrn-RA       | 145  | 27948021 | - |
| 3L | 10468452 | 10469223 | peak_3590 | 24.90064 | 10468755 | FBtr0334098 | S-Lap3-RC     | 2420 | 10466335 | + |
| 3L | 7359232  | 7360233  | peak_3372 | 13.77455 | 7359888  | FBtr0332731 | pst-RG        | 228  | 7360116  | - |
| 3R | 9576614  | 9578592  | peak_4769 | 15.4749  | 9577217  | FBtr0301189 | Kap-alpha3-RD | 256  | 9577473  | - |
| 3R | 11591307 | 11592426 | peak_4905 | 12.67755 | 11591986 | FBtr0082457 | Jupiter-RB    | 258  | 11592244 | - |
| 3L | 14705286 | 14705694 | peak_3810 | 12.67755 | 14705472 | FBtr0075687 | CG13476-RB    | 8    | 14705464 | + |
| 3L | 16673844 | 16675057 | peak_3945 | 11.61518 | 16674074 | FBtr0075316 | CG13032-RA    | 110  | 16673964 | + |

|    |          |          |           |          |          |             |                |     |          |   |
|----|----------|----------|-----------|----------|----------|-------------|----------------|-----|----------|---|
| 2R | 6014445  | 6015828  | peak_1614 | 20.32366 | 6015527  | FBtr0086029 | Act42A-RA      | 162 | 6015689  | - |
| 3R | 16098319 | 16098823 | peak_5166 | 14.90051 | 16098493 | FBtr0083229 | Mhcl-RA        | 268 | 16098761 | - |
| 2L | 4700971  | 4701444  | peak_488  | 17.84423 | 4701165  | FBtr0077420 | Taf12L-RA      | 320 | 4701485  | - |
| 2R | 23844830 | 23845549 | peak_2852 | 14.3338  | 23845180 | FBtr0072126 | CG5554-RA      | 179 | 23845001 | + |
| 3L | 16602375 | 16603458 | peak_3932 | 11.61518 | 16603105 | FBtr0331559 | CG32164-RB     | 52  | 16603053 | + |
| 3R | 20850623 | 20851033 | peak_5400 | 10.08448 | 20850809 | FBtr0083970 | RpS30-RB       | 25  | 20850834 | + |
| 2L | 18694613 | 18695518 | peak_1314 | 12.14226 | 18695209 | FBtr0089628 | CG10383-RA     | 217 | 18695426 | - |
| 3L | 15509238 | 15510183 | peak_3846 | 10.58593 | 15509451 | FBtr0091756 | gdl-ORF39-RA   | 6   | 15509445 | + |
| 3R | 15212744 | 15214189 | peak_5113 | 16.05663 | 15213276 | FBtr0083139 | CG6654-RA      | 382 | 15213658 | - |
| 2R | 14170345 | 14170797 | peak_2221 | 12.14226 | 14170640 | FBtr0087525 | CG8331-RA      | 178 | 14170462 | + |
| 3L | 9462471  | 9463047  | peak_3541 | 18.45464 | 9462648  | FBtr0343557 | CG44838-RH     | 41  | 9462607  | + |
| 3R | 29805972 | 29806972 | peak_5860 | 11.61518 | 29806504 | FBtr0085534 | ncd-RA         | 243 | 29806747 | - |
| 2R | 22596262 | 22597929 | peak_2760 | 17.84423 | 22596814 | FBtr0345701 | CR45328-RA     | 311 | 22597125 | - |
| 2L | 4971541  | 4972008  | peak_503  | 10.58593 | 4971784  | FBtr0078995 | CG14043-RA     | 82  | 4971702  | + |
| 2L | 7840268  | 7840837  | peak_729  | 11.61518 | 7840450  | FBtr0079526 | CG14537-RA     | 2   | 7840452  | + |
| 3L | 13442500 | 13443013 | peak_3767 | 17.84423 | 13442635 | FBtr0331533 | CG10732-RC     | 41  | 13442594 | + |
| 3L | 1334675  | 1335258  | peak_3043 | 13.22238 | 1334888  | FBtr0072679 | l(3)02640-RA   | 1   | 1334889  | + |
| 2R | 12513849 | 12514640 | peak_2088 | 17.84423 | 12514321 | FBtr0339635 | achi-RD        | 77  | 12514398 | - |
| 2R | 16010834 | 16011813 | peak_2326 | 11.61518 | 16011344 | FBtr0087263 | CG8388-RA      | 94  | 16011438 | - |
| 2R | 14575168 | 14575876 | peak_2249 | 20.32366 | 14575639 | FBtr0333166 | LamC-RB        | 132 | 14575771 | - |
| 2R | 13991052 | 13991429 | peak_2208 | 12.14226 | 13991316 | FBtr0087596 | mam-RA         | 113 | 13991203 | + |
| 2R | 9109130  | 9109677  | peak_1840 | 12.67755 | 9109381  | FBtr0088630 | Pmm45A-RA      | 337 | 9109718  | - |
| 2L | 6070721  | 6071263  | peak_603  | 11.61518 | 6070988  | FBtr0079192 | Kr-h2-RA       | 2   | 6070990  | + |
| 2L | 8980629  | 8982112  | peak_805  | 10.08448 | 8980741  | FBtr0079760 | CG18662-RA     | 82  | 8980659  | + |
| 2R | 18819444 | 18819947 | peak_2536 | 16.05663 | 18819608 | FBtr0112863 | Phb2-RF        | 141 | 18819467 | + |
| 2L | 17989638 | 17991131 | peak_1277 | 13.22238 | 17990812 | FBtr0081025 | Prosbeta5R2-RA | 394 | 17990418 | + |
| 3L | 12044476 | 12044983 | peak_3692 | 12.67755 | 12044673 | FBtr0310008 | CG43638-RA     | 94  | 12044579 | + |
| 2L | 13903395 | 13904293 | peak_1106 | 12.14226 | 13903919 | FBtr0343669 | Smg5-RC        | 289 | 13904208 | - |
| 2R | 1344335  | 1345887  | peak_1558 | 11.09627 | 1344941  | FBtr0344755 | Yeti-RB        | 178 | 1345119  | - |
| 2R | 9017730  | 9018164  | peak_1832 | 11.09627 | 9017893  | FBtr0088660 | CG13747-RA     | 78  | 9017815  | + |
| 3R | 28888872 | 28890549 | peak_5825 | 11.61518 | 28889047 | FBtr0299752 | Doa-RV         | 26  | 28889021 | + |
| 3L | 5152485  | 5153025  | peak_3291 | 11.61518 | 5152756  | FBtr0077169 | Srp54k-RA      | 78  | 5152678  | + |
| 3R | 9679647  | 9680417  | peak_4786 | 17.24148 | 9680053  | FBtr0082083 | nmdyn-D7-RA    | 114 | 9679939  | + |
| 2L | 2869657  | 2871253  | peak_400  | 22.90261 | 2869820  | FBtr0077628 | CG8813-RA      | 168 | 2869652  | + |
| 3L | 19255147 | 19255785 | peak_4081 | 20.32366 | 19255569 | FBtr0331852 | rept-RB        | 229 | 19255340 | + |
| 2R | 8358382  | 8359489  | peak_1794 | 12.14226 | 8359012  | FBtr0088739 | CG11635-RA     | 474 | 8358538  | + |
| 3R | 7528118  | 7528871  | peak_4633 | 10.58593 | 7528656  | FBtr0081549 | alpha-Est6-RA  | 121 | 7528777  | - |
| 2L | 16681845 | 16682899 | peak_1220 | 16.05663 | 16682305 | FBtr0080944 | CG31807-RA     | 97  | 16682402 | - |
| 2L | 15750250 | 15750782 | peak_1163 | 15.4749  | 15750553 | FBtr0343722 | l(2)35Di-RC    | 525 | 15751078 | - |
| 3L | 18621055 | 18621735 | peak_4053 | 11.61518 | 18621410 | FBtr0346438 | not-RC         | 719 | 18622129 | - |
| 2R | 23142015 | 23142742 | peak_2803 | 17.84423 | 23142164 | FBtr0071968 | Klp59D-RA      | 165 | 23141999 | + |

|    |          |          |           |          |          |             |                 |      |          |   |
|----|----------|----------|-----------|----------|----------|-------------|-----------------|------|----------|---|
| 3L | 1517353  | 1518094  | peak_3056 | 10.58593 | 1517739  | FBtr0306557 | Psa-RH          | 112  | 1517851  | + |
| 3L | 7364543  | 7365093  | peak_3374 | 12.14226 | 7364895  | FBtr0346857 | CR45835-RA      | 1297 | 7363598  | - |
| 3L | 20400938 | 20401526 | peak_4160 | 17.24148 | 20401378 | FBtr0078235 | trbl-RA         | 231  | 20401609 | - |
| 3R | 14381165 | 14381795 | peak_5064 | 17.84423 | 14381630 | FBtr0082940 | soti-RA         | 69   | 14381699 | - |
| 3L | 16858867 | 16859793 | peak_3962 | 10.08448 | 16859251 | FBtr0301683 | sinah-RC        | 171  | 16859080 | + |
| 3R | 15846383 | 15847457 | peak_5152 | 11.09627 | 15846492 | FBtr0083184 | CG4546-RA       | 42   | 15846534 | + |
| 3L | 8357922  | 8358761  | peak_3451 | 10.58593 | 8358590  | FBtr0333058 | Idh-RK          | 350  | 8358940  | - |
| 3R | 5549660  | 5551360  | peak_4505 | 19.07141 | 5550597  | FBtr0089313 | mia-RA          | 35   | 5550632  | - |
| 3L | 8989427  | 8990409  | peak_3496 | 17.84423 | 8990156  | FBtr0076552 | CG5280-RA       | 72   | 8990228  | - |
| 3L | 22263088 | 22264094 | peak_4266 | 10.08448 | 22263432 | FBtr0078492 | Ddx1-RA         | 63   | 22263369 | + |
| 2L | 2236064  | 2236499  | peak_354  | 11.61518 | 2236302  | FBtr0335158 | CR44115-RA      | 45   | 2236347  | + |
| X  | 11169985 | 11170685 | peak_6188 | 13.77455 | 11170391 | FBtr0346269 | CG1394-RB       | 287  | 11170678 | - |
| 2L | 14880514 | 14882047 | peak_1143 | 14.90051 | 14881725 | FBtr0080682 | Mst35Ba-RA      | 73   | 14881652 | - |
| 2L | 8217516  | 8218510  | peak_759  | 12.14226 | 8217714  | FBtr0079632 | CG8292-RA       | 303  | 8218017  | - |
| 2L | 18208356 | 18209340 | peak_1287 | 15.4749  | 18209149 | FBtr0081058 | CG31802-RA      | 88   | 18209237 | - |
| 3L | 15587293 | 15587928 | peak_3864 | 11.61518 | 15587488 | FBtr0332095 | CG7656-RF       | 379  | 15587867 | - |
| 3L | 11833222 | 11833739 | peak_3688 | 16.05663 | 11833398 | FBtr0304650 | CycA-RC         | 180  | 11833578 | - |
| 3R | 23729563 | 23730717 | peak_5546 | 27.64516 | 23730249 | FBtr0091662 | RNaseMRP:RNA-RA | 180  | 23730429 | - |
| 3L | 15523114 | 15524071 | peak_3851 | 13.22238 | 15523934 | FBtr0075600 | CG7945-RA       | 203  | 15524137 | - |
| 2R | 18140944 | 18141500 | peak_2493 | 10.08448 | 18141327 | FBtr0086740 | pAbp-RB         | 48   | 18141375 | + |
| 3R | 10310717 | 10312262 | peak_4853 | 13.22238 | 10311538 | FBtr0337051 | CG6293-RB       | 75   | 10311613 | - |
| 3L | 19545066 | 19545867 | peak_4087 | 10.58593 | 19545408 | FBtr0074937 | Rcd7-RB         | 196  | 19545604 | + |
| 2L | 14760680 | 14762953 | peak_1138 | 33.37759 | 14761009 | FBtr0080670 | CG4691-RA       | 242  | 14760767 | + |
| 3R | 8659412  | 8660984  | peak_4685 | 22.24879 | 8660326  | FBtr0081888 | bel-RA          | 96   | 8660422  | - |
| 3R | 28605405 | 28605788 | peak_5815 | 11.61518 | 28605593 | FBtr0085304 | CG9986-RA       | 486  | 28606079 | + |
| 2L | 18943348 | 18945337 | peak_1328 | 12.14226 | 18943782 | FBtr0342929 | ssp3-RB         | 178  | 18943960 | - |
| 3L | 540727   | 541229   | peak_3004 | 10.58593 | 540873   | FBtr0072550 | CG17180-RA      | 22   | 540851   | + |
| 2R | 23074103 | 23075573 | peak_2794 | 14.90051 | 23074696 | FBtr0071982 | Fib-RA          | 29   | 23074725 | - |
| 3L | 11608019 | 11609366 | peak_3662 | 11.09627 | 11609053 | FBtr0273305 | CG6091-RE       | 412  | 11609465 | - |
| 3R | 19904996 | 19905521 | peak_5341 | 11.61518 | 19905220 | FBtr0083821 | RhoGAP92B-RA    | 56   | 19905164 | + |
| 3L | 1298468  | 1299031  | peak_3036 | 10.58593 | 1298777  | FBtr0089942 | scf-RA          | 105  | 1298672  | + |
| 2L | 6799942  | 6801091  | peak_658  | 27.64516 | 6800280  | FBtr0079338 | tRNA:CR31631-RA | 536  | 6799744  | + |
| 3R | 24030261 | 24031959 | peak_5583 | 16.05663 | 24031683 | FBtr0084508 | KrT95D-RC       | 144  | 24031827 | - |
| 2L | 9436793  | 9438228  | peak_823  | 12.14226 | 9437894  | FBtr0079821 | numb-RB         | 425  | 9437469  | + |
| 3R | 15794593 | 15795526 | peak_5145 | 13.77455 | 15795088 | FBtr0309859 | ns11-RK         | 1306 | 15793782 | + |
| 3R | 30131366 | 30132447 | peak_5892 | 11.61518 | 30132134 | FBtr0085585 | CG31029-RA      | 261  | 30132395 | - |
| 2R | 7343070  | 7344537  | peak_1693 | 11.09627 | 7344222  | FBtr0334802 | CR44071-RA      | 877  | 7343345  | + |
| 3L | 12813044 | 12813989 | peak_3737 | 12.67755 | 12813584 | FBtr0075944 | CG10754-RA      | 435  | 12814019 | - |
| 2L | 20642584 | 20643322 | peak_1393 | 10.58593 | 20643129 | FBtr0081406 | CG17470-RA      | 115  | 20643244 | - |
| 3L | 18618048 | 18618345 | peak_4051 | 11.09627 | 18618183 | FBtr0075107 | tRNA:CR32200-RA | 207  | 18618390 | + |
| 3L | 20496669 | 20497109 | peak_4165 | 10.58593 | 20496932 | FBtr0113436 | CG32425-RF      | 391  | 20497323 | + |



|    |          |          |           |          |          |             |              |       |          |   |
|----|----------|----------|-----------|----------|----------|-------------|--------------|-------|----------|---|
| 3L | 20798313 | 20798731 | peak_4179 | 10.08448 | 20798554 | FBtr0078252 | CG4365-RB    | 91    | 20798645 | + |
| 3R | 30725975 | 30726735 | peak_5915 | 10.08448 | 30726302 | FBtr0085699 | CG1340-RA    | 215   | 30726087 | + |
| 2L | 20294502 | 20295688 | peak_1385 | 14.90051 | 20295018 | FBtr0081351 | CG12617-RA   | 325   | 20294693 | + |
| 3R | 5463195  | 5464361  | peak_4498 | 11.61518 | 5463746  | FBtr0330026 | PEK-RB       | 149   | 5463895  | - |
| 2L | 4433838  | 4434561  | peak_473  | 11.09627 | 4434379  | FBtr0112371 | CG34178-RC   | 36    | 4434415  | + |
| 3R | 28600261 | 28601420 | peak_5813 | 10.08448 | 28600436 | FBtr0085302 | Hrb98DE-RD   | 29    | 28600407 | + |
| 3R | 21219062 | 21219460 | peak_5428 | 10.08448 | 21219242 | FBtr0084050 | Oga-RA       | 165   | 21219077 | + |
| 3R | 4830173  | 4830608  | peak_4451 | 10.08448 | 4830453  | FBtr0078874 | CG14658-RA   | 60    | 4830513  | - |
| 2R | 21773148 | 21773694 | peak_2718 | 13.77455 | 21773369 | FBtr0071716 | CG4021-RA    | 74    | 21773295 | + |
| 2L | 9579203  | 9579843  | peak_833  | 14.3338  | 9579504  | FBtr0346456 | CG31709-RB   | 134   | 9579638  | - |
| 2R | 7781872  | 7782441  | peak_1738 | 11.09627 | 7782076  | FBtr0088932 | CG30497-RA   | 561   | 7782637  | - |
| 3R | 19247619 | 19248225 | peak_5312 | 10.08448 | 19247926 | FBtr0083741 | CG5217-RA    | 210   | 19248136 | - |
| 3R | 23859463 | 23859745 | peak_5563 | 14.3338  | 23859639 | FBtr0112907 | Pli-RB       | 30413 | 23890052 | - |
| 2L | 5099818  | 5100608  | peak_523  | 18.45464 | 5100070  | FBtr0345333 | CG8680-RB    | 132   | 5100202  | - |
| 2L | 10841643 | 10842866 | peak_924  | 11.09627 | 10842606 | FBtr0080187 | CG6700-RA    | 9     | 10842597 | - |
| 2L | 7799202  | 7800620  | peak_724  | 12.14226 | 7799680  | FBtr0079493 | Herp-RA      | 167   | 7799847  | - |
| 2R | 14933482 | 14934506 | peak_2280 | 24.22873 | 14934037 | FBtr0087406 | CG12853-RA   | 522   | 14933515 | + |
| 2R | 24669242 | 24670730 | peak_2918 | 72.65845 | 24669628 | FBtr0306655 | Pof-RC       | 231   | 24669397 | + |
| 2R | 22935569 | 22937103 | peak_2789 | 13.22238 | 22936016 | FBtr0303464 | CG3800-RB    | 708   | 22936724 | - |
| 2R | 21690466 | 21691505 | peak_2713 | 34.86029 | 21691110 | FBtr0300626 | CG42497-RA   | 29    | 21691139 | - |
| 3L | 14053068 | 14054367 | peak_3788 | 12.67755 | 14053527 | FBtr0334053 | CG32138-RD   | 312   | 14053215 | + |
| 3L | 12525983 | 12526701 | peak_3718 | 10.58593 | 12526173 | FBtr0075968 | eIF-2beta-RA | 558   | 12526731 | - |
| 2L | 9397615  | 9398184  | peak_819  | 12.67755 | 9397929  | FBtr0303900 | CG4438-RB    | 59    | 9397988  | - |
| 3R | 17081748 | 17082777 | peak_5218 | 10.08448 | 17081981 | FBtr0305987 | kuk-RC       | 35    | 17081946 | + |
| 2L | 13284539 | 13285083 | peak_1072 | 13.77455 | 13284776 | FBtr0334864 | CR44083-RA   | 151   | 13284927 | + |
| 3L | 1604734  | 1605000  | peak_3075 | 10.08448 | 1604861  | FBtr0300891 | CG33791-RE   | 147   | 1604714  | + |
| 2R | 15938765 | 15939766 | peak_2322 | 23.56257 | 15939387 | FBtr0087294 | Mlf-RC       | 63    | 15939450 | - |
| 2L | 13596746 | 13597309 | peak_1097 | 10.08448 | 13597118 | FBtr0080512 | CG9254-RA    | 68    | 13597186 | - |
| 3R | 25888143 | 25888845 | peak_5727 | 16.05663 | 25888410 | FBtr0339161 | Lnk-RE       | 132   | 25888542 | + |
| 2L | 17491733 | 17492285 | peak_1270 | 12.67755 | 17491927 | FBtr0080997 | qua-RB       | 388   | 17492315 | - |
| 2R | 24475230 | 24475660 | peak_2899 | 16.05663 | 24475405 | FBtr0072297 | CG16837-RA   | 19    | 24475386 | + |
| 3L | 7380791  | 7381904  | peak_3380 | 15.4749  | 7381432  | FBtr0076870 | SMSr-RA      | 42    | 7381474  | - |
| 3L | 6971988  | 6972632  | peak_3353 | 11.61518 | 6972478  | FBtr0076935 | CG10063-RA   | 11    | 6972467  | - |
| 2L | 6047470  | 6048194  | peak_591  | 12.67755 | 6047814  | FBtr0343130 | slmo-RE      | 120   | 6047934  | - |
| 2R | 7916174  | 7917970  | peak_1754 | 22.90261 | 7917708  | FBtr0088848 | Cull1-RD     | 530   | 7917178  | + |
| 2R | 12173809 | 12174273 | peak_2052 | 11.09627 | 12173985 | FBtr0088013 | Oda-RA       | 279   | 12174264 | - |
| 2L | 21178302 | 21178834 | peak_1438 | 10.08448 | 21178472 | FBtr0343872 | CR44911-RA   | 62    | 21178410 | + |
| 2L | 9429349  | 9430060  | peak_822  | 12.14226 | 9429966  | FBtr0343431 | FucTB-RC     | 34    | 9430000  | - |
| 3R | 27065264 | 27066684 | peak_5771 | 10.08448 | 27065824 | FBtr0333426 | CG43935-RA   | 388   | 27065436 | + |
| 2R | 12434891 | 12436318 | peak_2078 | 11.09627 | 12435606 | FBtr0087951 | DUBAI-RA     | 230   | 12435836 | - |
| 3L | 17022561 | 17022983 | peak_3972 | 18.45464 | 17022726 | FBtr0075291 | CG6652-RA    | 130   | 17022856 | - |

|    |          |          |           |          |          |             |                  |      |          |   |
|----|----------|----------|-----------|----------|----------|-------------|------------------|------|----------|---|
| 3R | 24360706 | 24361788 | peak_5632 | 24.22873 | 24361491 | FBtr0084627 | CG5762-RA        | 192  | 24361683 | - |
| 2R | 23706610 | 23707608 | peak_2841 | 12.67755 | 23707264 | FBtr0344995 | l(2)tid-RE       | 183  | 23707081 | + |
| 3R | 29503137 | 29503859 | peak_5848 | 13.22238 | 29503708 | FBtr0333188 | Trc8-RE          | 89   | 29503797 | - |
| 3R | 8823215  | 8824364  | peak_4705 | 15.4749  | 8824041  | FBtr0081930 | CG9836-RA        | 136  | 8824177  | - |
| 2R | 22806672 | 22807148 | peak_2783 | 10.08448 | 22806853 | FBtr0309858 | CycB-RE          | 95   | 22806948 | - |
| 3R | 4416270  | 4417084  | peak_4420 | 11.09627 | 4416631  | FBtr0078923 | CG31528-RA       | 193  | 4416438  | + |
| 3L | 9398632  | 9399258  | peak_3518 | 11.09627 | 9399095  | FBtr0309506 | CG4080-RB        | 132  | 9399227  | - |
| 3R | 5219205  | 5219737  | peak_4465 | 19.07141 | 5219477  | FBtr0078831 | Prosbeta2R2-RA   | 51   | 5219528  | - |
| 3R | 10881256 | 10882291 | peak_4877 | 10.58593 | 10881491 | FBtr0082333 | Tpc1-RB          | 697  | 10882188 | - |
| 2L | 6797552  | 6799739  | peak_657  | 23.56257 | 6798238  | FBtr0332369 | nrv2-RG          | 44   | 6798194  | - |
| X  | 5615481  | 5616383  | peak_6168 | 10.08448 | 5616090  | FBtr0112735 | CG34434-RB       | 280  | 5616370  | - |
| 3L | 1477615  | 1478127  | peak_3048 | 63.61293 | 1477805  | FBtr0332655 | robl62A-RB       | 186  | 1477619  | + |
| 2L | 6118412  | 6119356  | peak_611  | 22.24879 | 6118855  | FBtr0079199 | CG31642-RA       | 343  | 6118512  | + |
| 3R | 23758036 | 23758392 | peak_5551 | 12.14226 | 23758224 | FBtr0084453 | Flip-RB          | 115  | 23758339 | + |
| 3L | 836979   | 838484   | peak_3023 | 11.61518 | 837591   | FBtr0072596 | CG13901-RA       | 14   | 837577   | - |
| 3R | 27948513 | 27949052 | peak_5800 | 10.08448 | 27948667 | FBtr0085254 | Gp93-RA          | 44   | 27948711 | + |
| 2L | 16715729 | 16716188 | peak_1227 | 11.61518 | 16715880 | FBtr0080888 | Cyt-c-d-RA       | 11   | 16715891 | + |
| 2L | 14497748 | 14498178 | peak_1127 | 10.08448 | 14497980 | FBtr0345569 | CR45303-RA       | 136  | 14498116 | - |
| X  | 4105772  | 4106194  | peak_6162 | 13.22238 | 4105884  | FBtr0070640 | cib-RC           | 229  | 4106113  | + |
| 2L | 13202752 | 13203284 | peak_1056 | 11.09627 | 13203046 | FBtr0080488 | CG16972-RA       | 249  | 13203295 | - |
| 2R | 9578462  | 9579138  | peak_1868 | 10.08448 | 9578914  | FBtr0304957 | Not1-RG          | 93   | 9579007  | - |
| 3L | 9401361  | 9401844  | peak_3521 | 13.22238 | 9401484  | FBtr0076493 | eIF-4E-RF        | 321  | 9401805  | - |
| 3L | 3070026  | 3071002  | peak_3158 | 10.58593 | 3070385  | FBtr0073004 | CG32486-RD       | 454  | 3070839  | - |
| 2R | 9061351  | 9062001  | peak_1837 | 18.45464 | 9061819  | FBtr0339286 | CG8197-RB        | 105  | 9061924  | - |
| 2L | 5979968  | 5980936  | peak_586  | 17.24148 | 5980536  | FBtr0079234 | chic-RC          | 55   | 5980481  | - |
| 3L | 18822522 | 18823056 | peak_4068 | 11.61518 | 18822832 | FBtr0075058 | Cat-RA           | 228  | 18822604 | + |
| 3R | 22396472 | 22397550 | peak_5488 | 65.39541 | 22396873 | FBtr0084233 | tRNA:CR31162-RA  | 7    | 22396880 | - |
| 3R | 18242151 | 18243024 | peak_5261 | 17.24148 | 18242404 | FBtr0083566 | 14-3-3epsilon-RB | 127  | 18242531 | + |
| 3R | 24649575 | 24650346 | peak_5654 | 11.09627 | 24650185 | FBtr0084660 | ash2-RC          | 60   | 24650125 | + |
| 2L | 5059125  | 5059930  | peak_517  | 12.67755 | 5059576  | FBtr0079027 | Rpn11-RA         | 214  | 5059790  | - |
| 2R | 16158445 | 16159053 | peak_2345 | 20.95932 | 16158706 | FBtr0087250 | CG10734-RA       | 88   | 16158794 | - |
| 3R | 5606221  | 5607026  | peak_4523 | 11.61518 | 5606377  | FBtr0078743 | asl-RA           | 166  | 5606543  | - |
| 2L | 1973872  | 1974224  | peak_322  | 16.05663 | 1974105  | FBtr0077813 | Der-1-RA         | 7    | 1974112  | + |
| 3R | 30014766 | 30015799 | peak_5876 | 14.3338  | 30015347 | FBtr0085603 | CG7920-RA        | 63   | 30015284 | - |
| 3L | 1664454  | 1665281  | peak_3078 | 14.3338  | 1665059  | FBtr0309252 | CG7971-RG        | 5    | 1665064  | - |
| 3R | 27913456 | 27914209 | peak_5794 | 12.14226 | 27913915 | FBtr0085246 | mil-RA           | 1468 | 27912447 | + |
| X  | 18894451 | 18895627 | peak_6207 | 11.61518 | 18894837 | FBtr0074648 | CG7349-RA        | 330  | 18894507 | + |
| 3L | 22728009 | 22728715 | peak_4285 | 13.22238 | 22728165 | FBtr0078528 | CG11367-RA       | 54   | 22728111 | + |
| 2L | 2767251  | 2768140  | peak_388  | 11.09627 | 2767530  | FBtr0077735 | Taf10b-RA        | 315  | 2767845  | - |
| 3R | 4220649  | 4221144  | peak_4386 | 11.09627 | 4220908  | FBtr0336705 | aux-RC           | 78   | 4220986  | + |
| 2L | 13382575 | 13383633 | peak_1084 | 10.58593 | 13383062 | FBtr0303269 | loqs-RD          | 410  | 13382652 | + |

|    |          |          |           |          |          |             |                 |      |          |   |
|----|----------|----------|-----------|----------|----------|-------------|-----------------|------|----------|---|
| 3L | 3133654  | 3134170  | peak_3167 | 13.77455 | 3133881  | FBtr0113133 | CG11537-RE      | 299  | 3134180  | - |
| 3R | 21223343 | 21224090 | peak_5430 | 12.14226 | 21223540 | FBtr0347217 | CG3337-RB       | 44   | 21223584 | - |
| 3L | 4138457  | 4139112  | peak_3255 | 11.09627 | 4138849  | FBtr0310632 | Rop-RB          | 147  | 4138996  | - |
| 2R | 12636589 | 12637585 | peak_2102 | 17.84423 | 12637148 | FBtr0087843 | Iswi-RC         | 477  | 12636671 | + |
| 2R | 14656793 | 14657395 | peak_2258 | 14.90051 | 14656952 | FBtr0087482 | Adgf-E-RA       | 1803 | 14658755 | - |
| 3R | 11589702 | 11590853 | peak_4904 | 14.3338  | 11590180 | FBtr0082459 | CG6791-RA       | 34   | 11590146 | - |
| 3R | 13648694 | 13649346 | peak_5008 | 10.58593 | 13649100 | FBtr0346346 | rin-RF          | 278  | 13648822 | + |
| 2L | 4454386  | 4454922  | peak_479  | 13.22238 | 4454553  | FBtr0077440 | CG15434-RA      | 73   | 4454626  | + |
| 3R | 8343522  | 8344182  | peak_4672 | 10.08448 | 8343740  | FBtr0081839 | CG18193-RA      | 71   | 8343669  | + |
| 3L | 3026152  | 3026763  | peak_3147 | 16.05663 | 3026502  | FBtr0073006 | aly-RA          | 19   | 3026521  | - |
| 3L | 20815467 | 20818228 | peak_4180 | 58.34786 | 20816713 | FBtr0299891 | Pka-RI-RK       | 595  | 20816118 | + |
| 2L | 852628   | 853362   | peak_282  | 23.56257 | 852982   | FBtr0334794 | kraken-RB       | 134  | 852848   | + |
| 3R | 31218484 | 31219910 | peak_5931 | 17.24148 | 31219726 | FBtr0085772 | CG1746-RA       | 96   | 31219630 | - |
| 3R | 12678675 | 12679216 | peak_4969 | 11.09627 | 12678851 | FBtr0082668 | mbo-RA          | 201  | 12679052 | - |
| 3L | 2377035  | 2377430  | peak_3113 | 10.08448 | 2377220  | FBtr0072899 | CG15877-RA      | 336  | 2377556  | - |
| 2R | 20264162 | 20265494 | peak_2634 | 10.08448 | 20265093 | FBtr0332257 | CR43812-RA      | 52   | 20265145 | - |
| 3R | 22689626 | 22690127 | peak_5508 | 10.58593 | 22689782 | FBtr0302856 | wfs1-RC         | 598  | 22690380 | - |
| 2R | 17072499 | 17073192 | peak_2415 | 14.3338  | 17072943 | FBtr0300958 | CG30460-RH      | 109  | 17073052 | - |
| 3L | 14001941 | 14002291 | peak_3775 | 11.09627 | 14002104 | FBtr0333050 | upSET-RB        | 23   | 14002127 | + |
| 2L | 13373860 | 13374306 | peak_1082 | 10.08448 | 13374032 | FBtr0342631 | CG6565-RB       | 13   | 13374019 | + |
| 2R | 9969718  | 9970482  | peak_1909 | 13.22238 | 9970094  | FBtr0339425 | Adam-RB         | 1030 | 9969064  | + |
| 3R | 5251272  | 5251767  | peak_4472 | 10.08448 | 5251604  | FBtr0078823 | CG12163-RA      | 141  | 5251745  | - |
| 3R | 30601689 | 30602335 | peak_5911 | 20.32366 | 30601883 | FBtr0300983 | CG31021-RB      | 323  | 30602206 | + |
| 2L | 13203608 | 13204528 | peak_1057 | 14.90051 | 13204124 | FBtr0334752 | Pect-RE         | 362  | 13203762 | + |
| 3R | 30991867 | 30992679 | peak_5921 | 26.95125 | 30992327 | FBtr0085747 | CG31007-RA      | 130  | 30992457 | - |
| 3R | 26866409 | 26867492 | peak_5756 | 22.90261 | 26866787 | FBtr0085095 | ball-RA         | 20   | 26866807 | - |
| 2R | 6152813  | 6153988  | peak_1626 | 10.58593 | 6153479  | FBtr0100016 | tRNA:N5:42Af-RA | 100  | 6153579  | - |
| 3L | 9476679  | 9477286  | peak_3544 | 12.14226 | 9476957  | FBtr0076472 | Uch-L5-RA       | 8    | 9476965  | - |
| 3R | 19462463 | 19463318 | peak_5322 | 14.90051 | 19463149 | FBtr0083769 | CG6255-RA       | 83   | 19463066 | - |
| 2R | 14752736 | 14753072 | peak_2269 | 11.09627 | 14752897 | FBtr0087474 | Rpn6-RA         | 13   | 14752910 | - |
| 3L | 16647281 | 16648086 | peak_3942 | 14.3338  | 16647829 | FBtr0345369 | Abl-RJ          | 53   | 16647882 | - |
| 2L | 16005786 | 16006520 | peak_1171 | 20.95932 | 16006249 | FBtr0305220 | CG31820-RB      | 30   | 16006279 | - |
| 2L | 12057846 | 12059268 | peak_994  | 35.60972 | 12058949 | FBtr0342598 | CG34164-RC      | 1171 | 12057778 | + |
| 3R | 30989789 | 30990200 | peak_5920 | 17.84423 | 30990038 | FBtr0085748 | CG31008-RA      | 32   | 30990006 | - |
| 3L | 3147582  | 3148514  | peak_3169 | 10.58593 | 3148282  | FBtr0307308 | CG12082-RB      | 76   | 3148358  | - |
| 3R | 28812058 | 28812578 | peak_5820 | 10.58593 | 28812283 | FBtr0113299 | CG1646-RE       | 118  | 28812165 | + |
| 3R | 16750959 | 16751489 | peak_5206 | 12.14226 | 16751137 | FBtr0083346 | CG31275-RA      | 197  | 16751334 | - |
| 3R | 30424180 | 30425311 | peak_5902 | 15.4749  | 30425113 | FBtr0085628 | CG15536-RA      | 49   | 30425162 | - |
| 2R | 13438509 | 13438879 | peak_2156 | 11.61518 | 13438690 | FBtr0299759 | CG42321-RK      | 361  | 13439051 | - |
| 2R | 10086563 | 10087165 | peak_1932 | 10.58593 | 10086927 | FBtr0089674 | sut4-RA         | 200  | 10087127 | - |
| 3L | 1250547  | 12511740 | peak_3033 | 17.84423 | 1251163  | FBtr0072653 | CG9129-RA       | 467  | 1250696  | + |

|    |          |          |           |          |          |             |               |      |          |   |
|----|----------|----------|-----------|----------|----------|-------------|---------------|------|----------|---|
| 2R | 16205778 | 16206381 | peak_2349 | 12.14226 | 16206056 | FBtr0087196 | mrj-RA        | 182  | 16206238 | - |
| 2L | 14924309 | 14925134 | peak_1146 | 15.4749  | 14924650 | FBtr0080675 | CG3491-RA     | 60   | 14924590 | + |
| 3R | 31747975 | 31748616 | peak_5952 | 16.64565 | 31748377 | FBtr0085840 | CG1910-RD     | 182  | 31748559 | + |
| 3R | 23746817 | 23747272 | peak_5549 | 12.67755 | 23747005 | FBtr0347324 | CR46091-RA    | 143  | 23747148 | - |
| 3R | 13660111 | 13660522 | peak_5011 | 10.58593 | 13660342 | FBtr0310621 | Hrb87F-RD     | 189  | 13660531 | - |
| 3R | 19903028 | 19903990 | peak_5340 | 13.77455 | 19903491 | FBtr0344261 | CG4538-RC     | 198  | 19903689 | - |
| 2L | 2609915  | 2610383  | peak_375  | 14.3338  | 2610094  | FBtr0114513 | CG15395-RB    | 100  | 2609994  | + |
| 2L | 10790213 | 10791260 | peak_922  | 16.64565 | 10790405 | FBtr0342584 | CG31870-RE    | 183  | 10790222 | + |
| 3L | 6550057  | 6550490  | peak_3333 | 26.95125 | 6550247  | FBtr0307510 | CG18769-RG    | 491  | 6550738  | + |
| 3R | 25851648 | 25852148 | peak_5725 | 10.08448 | 25852039 | FBtr0084907 | CG5886-RA     | 407  | 25851632 | + |
| 2R | 24903493 | 24904231 | peak_2935 | 17.84423 | 24903972 | FBtr0100231 | RpL41-RA      | 37   | 24903935 | - |
| 2L | 11948234 | 11948792 | peak_981  | 12.14226 | 11948634 | FBtr0080282 | CG16964-RA    | 669  | 11947965 | + |
| 2L | 329385   | 330052   | peak_258  | 12.67755 | 329788   | FBtr0330695 | CG43755-RD    | 27   | 329761   | - |
| 2L | 3621498  | 3621958  | peak_454  | 18.45464 | 3621660  | FBtr0077556 | CG15418-RA    | 21   | 3621681  | - |
| 3L | 19833516 | 19834448 | peak_4112 | 10.58593 | 19834293 | FBtr0332154 | trc-RB        | 11   | 19834304 | - |
| 2L | 8705498  | 8706067  | peak_800  | 12.14226 | 8705660  | FBtr0079731 | CG9314-RA     | 88   | 8705572  | + |
| 2L | 6686284  | 6686935  | peak_649  | 21.60102 | 6686686  | FBtr0079315 | CG11327-RA    | 26   | 6686712  | - |
| 2R | 13910600 | 13911152 | peak_2194 | 11.09627 | 13910719 | FBtr0087621 | shot-RH       | 227  | 13910946 | - |
| 2L | 10846621 | 10847385 | peak_927  | 16.64565 | 10846866 | FBtr0332030 | Porin2-RB     | 178  | 10847044 | - |
| 3L | 21574523 | 21575760 | peak_4245 | 14.90051 | 21575563 | FBtr0300057 | CG32441-RC    | 1006 | 21574557 | + |
| 3R | 8008931  | 8009665  | peak_4649 | 10.08448 | 8009263  | FBtr0081821 | CG11052-RA    | 24   | 8009239  | - |
| 3L | 803724   | 804123   | peak_3019 | 11.09627 | 803895   | FBtr0072599 | CG13898-RA    | 156  | 804051   | - |
| 3R | 22710485 | 22710908 | peak_5510 | 10.58593 | 22710717 | FBtr0084330 | CG4907-RA     | 45   | 22710762 | - |
| 3R | 15094602 | 15095152 | peak_5099 | 10.58593 | 15094966 | FBtr0344380 | CG6966-RC     | 665  | 15095631 | - |
| 3R | 8344397  | 8345607  | peak_4673 | 24.90064 | 8344869  | FBtr0081840 | DppIII-RB     | 469  | 8344400  | + |
| 2R | 21267260 | 21267715 | peak_2690 | 14.90051 | 21267450 | FBtr0071620 | CG30393-RA    | 129  | 21267579 | - |
| 3L | 8308387  | 8308999  | peak_3446 | 10.08448 | 8308803  | FBtr0076712 | BI-1-RB       | 138  | 8308941  | - |
| 3L | 21636773 | 21637483 | peak_4250 | 21.60102 | 21637098 | FBtr0078424 | CG32444-RA    | 151  | 21636947 | + |
| 3R | 15345907 | 15346741 | peak_5127 | 10.08448 | 15346252 | FBtr0083087 | CG31301-RA    | 47   | 15346205 | + |
| 2R | 23127251 | 23128268 | peak_2801 | 14.90051 | 23127926 | FBtr0340515 | CR44455-RA    | 151  | 23128077 | - |
| 3R | 8340441  | 8341271  | peak_4671 | 12.67755 | 8340574  | FBtr0305680 | CG9603-RB     | 325  | 8340899  | - |
| 2L | 8042591  | 8042891  | peak_739  | 13.77455 | 8042718  | FBtr0079546 | RpL36A-RA     | 141  | 8042859  | - |
| 2L | 13163314 | 13164893 | peak_1044 | 11.09627 | 13163699 | FBtr0329989 | DnaJ-H-RC     | 1319 | 13165018 | - |
| 3L | 4040608  | 4041019  | peak_3236 | 13.77455 | 4040830  | FBtr0073202 | Rcd5-RA       | 301  | 4040529  | + |
| 2R | 9847435  | 9848016  | peak_1892 | 12.67755 | 9847843  | FBtr0089998 | Prosalpha7-RA | 7    | 9847836  | - |
| 3L | 21577047 | 21577394 | peak_4247 | 10.58593 | 21577216 | FBtr0333457 | CR43939-RA    | 3    | 21577219 | - |
| 2L | 16003497 | 16003753 | peak_1169 | 10.58593 | 16003589 | FBtr0112358 | CG34167-RA    | 52   | 16003641 | - |
| 3L | 9383991  | 9384878  | peak_3515 | 10.58593 | 9384288  | FBtr0076454 | Hsp27-RA      | 225  | 9384063  | + |
| 3R | 24871687 | 24872273 | peak_5671 | 16.64565 | 24871991 | FBtr0334578 | CycB3-RB      | 1175 | 24870816 | - |
| 2L | 3090648  | 3091288  | peak_421  | 27.64516 | 3090974  | FBtr0077665 | toc-RB        | 63   | 3090911  | - |
| 3R | 19860805 | 19861571 | peak_5334 | 11.09627 | 19861238 | FBtr0113248 | Irel-RB       | 53   | 19861291 | - |

|    |          |          |           |           |          |             |                 |      |          |   |
|----|----------|----------|-----------|-----------|----------|-------------|-----------------|------|----------|---|
| 3R | 16263802 | 16264226 | peak_5180 | 12.67755  | 16263979 | FBtr0083276 | bor-RA          | 116  | 16264095 | - |
| 3R | 17149096 | 17149528 | peak_5220 | 10.08448  | 17149204 | FBtr0337043 | m-cup-RB        | 208  | 17149412 | - |
| 2R | 11293921 | 11294534 | peak_1996 | 10.08448  | 11294262 | FBtr0336733 | CG18336-RB      | 57   | 11294319 | - |
| 3L | 3900337  | 3900702  | peak_3227 | 140.42876 | 3900512  | FBtr0073180 | Ccz1-RB         | 1356 | 3899156  | - |
| 2R | 20623008 | 20623668 | peak_2649 | 13.77455  | 20623477 | FBtr0086254 | CG11180-RA      | 48   | 20623429 | - |
| 3R | 5222837  | 5223668  | peak_4466 | 10.58593  | 5223164  | FBtr0078830 | CG2604-RB       | 103  | 5223267  | - |
| 3R | 7059162  | 7060326  | peak_4597 | 22.24879  | 7059987  | FBtr0305962 | dj-RC           | 671  | 7059316  | + |
| 3R | 24634727 | 24635197 | peak_5653 | 14.90051  | 24635014 | FBtr0339136 | CG43222-RB      | 63   | 24635077 | - |
| 2L | 8082594  | 8083301  | peak_741  | 11.09627  | 8083060  | FBtr0079543 | Mcr-RA          | 78   | 8082982  | - |
| 3L | 8060480  | 8061300  | peak_3426 | 12.14226  | 8061116  | FBtr0076742 | tRNA:CR32360-RA | 360  | 8060756  | - |
| 3L | 4403219  | 4403593  | peak_3272 | 11.61518  | 4403396  | FBtr0330179 | Syx17-RB        | 91   | 4403487  | + |
| 2L | 6664732  | 6665195  | peak_646  | 11.61518  | 6664867  | FBtr0333516 | CG34310-RC      | 899  | 6663968  | + |
| 2L | 10577314 | 10577909 | peak_911  | 16.64565  | 10577675 | FBtr0080132 | w-cup-RA        | 117  | 10577792 | - |
| 3L | 2243719  | 2244644  | peak_3107 | 16.64565  | 2243948  | FBtr0332663 | CG32301-RD      | 530  | 2244478  | + |
| 3R | 30387354 | 30387918 | peak_5900 | 20.32366  | 30387575 | FBtr0306587 | Fer1HCH-RF      | 25   | 30387600 | - |
| 3L | 5793652  | 5794428  | peak_3314 | 10.58593  | 5794196  | FBtr0344538 | Brel-RB         | 4    | 5794192  | - |
| 3R | 21403618 | 21405467 | peak_5443 | 23.56257  | 21403800 | FBtr0113262 | CG7907-RC       | 65   | 21403735 | + |
| 2L | 16324133 | 16324988 | peak_1188 | 11.09627  | 16324325 | FBtr0080847 | cact-RD         | 1095 | 16325420 | - |
| 3R | 24799367 | 24799732 | peak_5663 | 13.22238  | 24799551 | FBtr0345210 | Ude-RD          | 26   | 24799577 | - |
| 2R | 12510196 | 12510789 | peak_2087 | 30.47042  | 12510516 | FBtr0087945 | vis-RB          | 99   | 12510615 | - |
| 3R | 18982997 | 18984155 | peak_5296 | 14.90051  | 18983965 | FBtr0343991 | gukh-RE         | 60   | 18984025 | + |
| 2L | 18523596 | 18524039 | peak_1304 | 10.58593  | 18523849 | FBtr0343832 | CR44903-RA      | 92   | 18523941 | - |
| 3L | 292010   | 293129   | peak_2993 | 13.22238  | 293046   | FBtr0333958 | RhoGEF3-RH      | 354  | 292692   | + |
| 3L | 17465805 | 17466344 | peak_3984 | 11.09627  | 17465992 | FBtr0075220 | CG7603-RA       | 47   | 17465945 | + |
| 2R | 16287809 | 16288251 | peak_2359 | 11.09627  | 16288146 | FBtr0087181 | CG30324-RA      | 87   | 16288233 | - |
| 3L | 9457725  | 9458343  | peak_3538 | 10.08448  | 9458139  | FBtr0076463 | CG3552-RA       | 227  | 9457912  | + |
| 2L | 20835454 | 20835874 | peak_1416 | 17.24148  | 20835652 | FBtr0290042 | Oseg5-RB        | 188  | 20835840 | - |
| 2R | 18454388 | 18454685 | peak_2521 | 10.58593  | 18454519 | FBtr0086722 | CG17669-RA      | 57   | 18454462 | - |
| 3R | 20557358 | 20558488 | peak_5364 | 10.58593  | 20557678 | FBtr0344280 | att-ORFA-RD     | 11   | 20557667 | - |
| 3L | 16574549 | 16575370 | peak_3918 | 10.58593  | 16574847 | FBtr0330137 | mbf1-RE         | 202  | 16574645 | + |
| 2L | 13165925 | 13166266 | peak_1045 | 12.67755  | 13166114 | FBtr0080493 | DnaJ-H-RB       | 42   | 13166072 | - |
| 2L | 17452932 | 17453333 | peak_1263 | 11.61518  | 17453097 | FBtr0305682 | CG5050-RB       | 2    | 17453099 | + |
| 2R | 18686395 | 18686947 | peak_2531 | 11.61518  | 18686721 | FBtr0340485 | CG44433-RA      | 54   | 18686775 | - |
| 3R | 25032912 | 25033775 | peak_5679 | 11.09627  | 25033597 | FBtr0084796 | Smg6-RA         | 132  | 25033465 | - |
| 3R | 5588108  | 5589205  | peak_4512 | 12.67755  | 5588364  | FBtr0078752 | CG2926-RA       | 16   | 5588380  | - |
| 2L | 2987050  | 2987674  | peak_411  | 12.14226  | 2987514  | FBtr0305980 | Chd1-RB         | 32   | 2987482  | - |
| 3R | 8944808  | 8945215  | peak_4710 | 22.90261  | 8945052  | FBtr0082015 | CG11964-RA      | 32   | 8945020  | - |
| 3R | 5257295  | 5258601  | peak_4474 | 10.58593  | 5257527  | FBtr0334276 | Hph-RC          | 490  | 5257037  | + |
| 3L | 10490809 | 10493459 | peak_3592 | 83.9138   | 10491300 | FBtr0076288 | S-Lap4-RA       | 439  | 10490861 | + |
| 3L | 7387118  | 7387465  | peak_3382 | 14.90051  | 7387254  | FBtr0076869 | CG8564-RA       | 109  | 7387363  | - |
| 3R | 10331050 | 10331826 | peak_4855 | 13.77455  | 10331421 | FBtr0331683 | Bruce-RD        | 68   | 10331353 | - |

|    |          |          |           |          |          |             |                 |      |          |   |
|----|----------|----------|-----------|----------|----------|-------------|-----------------|------|----------|---|
| 3L | 8192774  | 8193270  | peak_3441 | 12.67755 | 8193021  | FBtr0076723 | CG7387-RA       | 95   | 8193116  | - |
| 2R | 11420481 | 11421357 | peak_2002 | 11.09627 | 11420614 | FBtr0331388 | Drip-RD         | 4056 | 11424670 | - |
| 3R | 31057900 | 31058630 | peak_5924 | 10.08448 | 31058175 | FBtr0334548 | dco-RD          | 3035 | 31061210 | - |
| 2R | 8361877  | 8362300  | peak_1796 | 12.14226 | 8362128  | FBtr0339351 | hub1-RB         | 28   | 8362156  | - |
| 3R | 25482331 | 25483150 | peak_5701 | 14.3338  | 25482499 | FBtr0344719 | XNP-RD          | 79   | 25482578 | - |
| 3R | 10735336 | 10736082 | peak_4872 | 10.58593 | 10735941 | FBtr0082316 | tomboy20-RA     | 16   | 10735957 | - |
| 3R | 12366500 | 12367139 | peak_4945 | 14.90051 | 12366905 | FBtr0082608 | GstD9-RA        | 659  | 12367564 | - |
| 3R | 24221927 | 24222639 | peak_5606 | 11.09627 | 24222068 | FBtr0084571 | twin-RF         | 103  | 24221965 | - |
| 3R | 18628229 | 18628562 | peak_5282 | 11.09627 | 18628352 | FBtr0083693 | tRNA:CR31228-RA | 186  | 18628538 | - |
| 2R | 23986539 | 23987006 | peak_2872 | 12.14226 | 23986701 | FBtr0072159 | CG30178-RA      | 86   | 23986615 | + |
| 2L | 2771479  | 2772070  | peak_391  | 29.04851 | 2771870  | FBtr0077730 | CG15399-RA      | 94   | 2771776  | - |
| 3L | 11120608 | 11121011 | peak_3626 | 10.08448 | 11120776 | FBtr0301967 | fd68A-RK        | 7    | 11120783 | - |
| 2L | 10431277 | 10432159 | peak_903  | 11.61518 | 10431440 | FBtr0080025 | TfIIB-RA        | 102  | 10431338 | + |
| 3L | 9423360  | 9424162  | peak_3530 | 10.08448 | 9423655  | FBtr0076457 | aay-RA          | 402  | 9423253  | + |
| 3L | 19543877 | 19544329 | peak_4086 | 14.3338  | 19544050 | FBtr0074976 | CG9279-RB       | 122  | 19544172 | - |
| 3R | 7530861  | 7531903  | peak_4635 | 16.05663 | 7531255  | FBtr0081538 | alphaTub84D-RA  | 502  | 7530753  | + |
| 2L | 17626119 | 17626501 | peak_1273 | 10.58593 | 17626350 | FBtr0080988 | CG15147-RA      | 31   | 17626381 | - |
| 2R | 6190315  | 6190886  | peak_1635 | 14.90051 | 6190635  | FBtr0085989 | tRNA:N5:42Ad-RA | 263  | 6190372  | + |
| 2R | 17406374 | 17406776 | peak_2430 | 11.09627 | 17406623 | FBtr0340144 | CG6568-RB       | 527  | 17407150 | - |
| 3R | 21097570 | 21098673 | peak_5407 | 12.67755 | 21097841 | FBtr0084036 | RhoGAP93B-RA    | 14   | 21097827 | - |
| 3R | 17391751 | 17392359 | peak_5223 | 10.08448 | 17392177 | FBtr0336488 | CR44160-RA      | 4    | 17392173 | - |
| 2R | 6980916  | 6981492  | peak_1678 | 15.4749  | 6981217  | FBtr0344617 | CR44171-RB      | 22   | 6981195  | - |
| 3R | 24037457 | 24038545 | peak_5586 | 10.58593 | 24037594 | FBtr0084596 | Miro-RE         | 136  | 24037730 | - |
| 2R | 24499865 | 24500596 | peak_2900 | 13.77455 | 24500328 | FBtr0072351 | Ss1-RA          | 61   | 24500267 | - |
| 2R | 17722303 | 17722706 | peak_2469 | 10.58593 | 17722419 | FBtr0086859 | CG10934-RA      | 80   | 17722339 | + |
| 2L | 15960050 | 15961931 | peak_1168 | 24.22873 | 15961484 | FBtr0080808 | beat-Ib-RA      | 951  | 15962435 | - |
| 3R | 14511283 | 14511995 | peak_5071 | 20.32366 | 14511603 | FBtr0330045 | HtrA2-RB        | 109  | 14511712 | - |
| 3L | 1307142  | 1307770  | peak_3039 | 11.09627 | 1307470  | FBtr0331867 | CG2277-RB       | 52   | 1307418  | - |
| 2L | 10766699 | 10767241 | peak_921  | 11.61518 | 10767070 | FBtr0080116 | Ubc2-RB         | 16   | 10767086 | - |
| 3R | 11221570 | 11223196 | peak_4887 | 12.14226 | 11221744 | FBtr0082367 | CG6693-RA       | 105  | 11221639 | - |
| 2L | 8212603  | 8213337  | peak_755  | 14.90051 | 8212927  | FBtr0079634 | CG8372-RB       | 25   | 8212902  | - |
| 3R | 4784364  | 4785168  | peak_4444 | 10.08448 | 4784795  | FBtr0078880 | CG17387-RA      | 73   | 4784722  | - |
| 3L | 15302615 | 15302920 | peak_3838 | 13.77455 | 15302765 | FBtr0075618 | Best3-RA        | 20   | 15302785 | - |
| 2R | 20562755 | 20563064 | peak_2643 | 10.08448 | 20562965 | FBtr0342705 | CG43308-RB      | 36   | 20563001 | - |
| 2L | 12697140 | 12698107 | peak_1023 | 11.61518 | 12697525 | FBtr0080409 | CG5781-RA       | 202  | 12697323 | - |
| 3R | 22018743 | 22019561 | peak_5469 | 16.64565 | 22019178 | FBtr0084190 | CG6439-RA       | 6    | 22019184 | - |
| 3R | 5601381  | 5602843  | peak_4522 | 21.60102 | 5601594  | FBtr0333278 | CG1427-RD       | 161  | 5601433  | + |
| 3R | 10761370 | 10762417 | peak_4874 | 11.61518 | 10762033 | FBtr0344136 | CR45016-RB      | 236  | 10761797 | - |
| 2R | 14255606 | 14256860 | peak_2228 | 12.14226 | 14256068 | FBtr0339969 | Hsc70-5-RB      | 7    | 14256061 | - |
| 3L | 2502556  | 2502956  | peak_3120 | 18.45464 | 2502757  | FBtr0072966 | CG16758-RF      | 58   | 2502815  | - |
| 2L | 18708168 | 18709107 | peak_1319 | 12.67755 | 18708557 | FBtr0343115 | Faf-RB          | 42   | 18708599 | - |

|    |          |          |           |          |          |             |                 |      |          |   |
|----|----------|----------|-----------|----------|----------|-------------|-----------------|------|----------|---|
| 3L | 8533200  | 8533593  | peak_3462 | 11.09627 | 8533398  | FBtr0301629 | ergic53-RA      | 1579 | 8534977  | + |
| 3L | 4689741  | 4690166  | peak_3283 | 10.58593 | 4689992  | FBtr0073366 | CG18418-RA      | 78   | 4690070  | - |
| 3R | 24359743 | 24360511 | peak_5631 | 13.77455 | 24360174 | FBtr0084628 | CG18528-RA      | 30   | 24360144 | - |
| 2L | 20923793 | 20924378 | peak_1422 | 11.61518 | 20924033 | FBtr0081439 | Mtp-RA          | 1157 | 20922876 | - |
| 3R | 20985920 | 20986234 | peak_5403 | 10.58593 | 20986037 | FBtr0309203 | Calx-RE         | 58   | 20985979 | + |
| 3L | 13279799 | 13280354 | peak_3759 | 49.86517 | 13280007 | FBtr0344572 | CR43146-RD      | 2386 | 13282393 | + |
| 3R | 18301399 | 18301871 | peak_5271 | 13.77455 | 18301686 | FBtr0083594 | CG18600-RA      | 42   | 18301728 | - |
| 3L | 9815747  | 9816064  | peak_3573 | 12.14226 | 9815908  | FBtr0332824 | CG43897-RG      | 154  | 9816062  | + |
| 3R | 23203895 | 23204214 | peak_5528 | 11.09627 | 23204052 | FBtr0084399 | fzo-RA          | 18   | 23204034 | - |
| 3L | 6665273  | 6665758  | peak_3337 | 14.3338  | 6665588  | FBtr0076963 | eIF4E-4-RA      | 53   | 6665641  | - |
| 2L | 13160479 | 13161901 | peak_1042 | 20.95932 | 13160707 | FBtr0080433 | CG5204-RA       | 180  | 13160527 | + |
| 2L | 12974831 | 12975304 | peak_1033 | 11.09627 | 12974939 | FBtr0305551 | Vha68-2-RD      | 247  | 12975186 | + |
| 2L | 11120008 | 11120463 | peak_942  | 14.90051 | 11120280 | FBtr0080228 | CG6230-RA       | 39   | 11120319 | - |
| 3L | 2265518  | 2266074  | peak_3109 | 11.09627 | 2265886  | FBtr0072903 | ecd-RA          | 29   | 2265857  | - |
| 2R | 19714750 | 19715466 | peak_2624 | 14.3338  | 19714990 | FBtr0086330 | tRNA:CR30215-RA | 575  | 19715565 | + |
| 3L | 5780358  | 5781051  | peak_3311 | 10.58593 | 5780554  | FBtr0091709 | PGRP-LD-RA      | 290  | 5780264  | + |
| 3R | 24914838 | 24915794 | peak_5674 | 64.50218 | 24915340 | FBtr0084721 | tRNA:CR31416-RA | 209  | 24915131 | - |
| 3R | 16274051 | 16275209 | peak_5181 | 16.64565 | 16274322 | FBtr0100331 | gish-RF         | 1321 | 16273001 | + |
| 2R | 6225509  | 6226025  | peak_1640 | 10.08448 | 6225666  | FBtr0085994 | tomboy40-RA     | 32   | 6225634  | + |
| 3L | 14691321 | 14691719 | peak_3809 | 10.58593 | 14691519 | FBtr0075685 | CG13477-RA      | 172  | 14691347 | + |
| 2R | 24948148 | 24948774 | peak_2938 | 11.61518 | 24948313 | FBtr0072409 | CG2790-RA       | 65   | 24948378 | - |
| 2R | 8365126  | 8365554  | peak_1799 | 16.05663 | 8365285  | FBtr0113373 | swif-RB         | 60   | 8365345  | - |
| 2R | 24599459 | 24600194 | peak_2909 | 19.69469 | 24599855 | FBtr0072339 | CG4692-RB       | 34   | 24599821 | - |
| 2L | 5009565  | 5011487  | peak_508  | 31.9148  | 5009779  | FBtr0079038 | Rtnl1-RF        | 59   | 5009720  | - |
| 2R | 22068181 | 22069272 | peak_2733 | 11.09627 | 22069085 | FBtr0339101 | Snp-RF          | 810  | 22068275 | + |
| 3L | 5932298  | 5932880  | peak_3320 | 15.4749  | 5932688  | FBtr0077076 | Rcc1-RC         | 76   | 5932612  | - |
| 2L | 15263979 | 15264433 | peak_1154 | 14.90051 | 15264247 | FBtr0080709 | yuri-RB         | 20   | 15264227 | - |
| 2L | 14548745 | 14549238 | peak_1132 | 15.4749  | 14549073 | FBtr0343704 | CG4218-RC       | 36   | 14549109 | - |
| 3L | 16049518 | 16050018 | peak_3900 | 11.61518 | 16049727 | FBtr0333615 | CR43951-RA      | 492  | 16049235 | + |
| 2L | 17473502 | 17474676 | peak_1267 | 11.09627 | 17473591 | FBtr0080982 | Sgt-RA          | 101  | 17473490 | + |
| 3R | 15131656 | 15132098 | peak_5103 | 35.60972 | 15131922 | FBtr0303485 | CG42788-RC      | 4    | 15131926 | - |
| 2L | 2948841  | 2949222  | peak_408  | 10.58593 | 2949071  | FBtr0290038 | lilli-RD        | 2508 | 2946563  | + |
| 2R | 15927267 | 15927712 | peak_2319 | 11.09627 | 15927535 | FBtr0087299 | bdg-RB          | 795  | 15928330 | - |
| 3R | 7529564  | 7530363  | peak_4634 | 11.61518 | 7529931  | FBtr0307275 | Rtnl2-RB        | 48   | 7529883  | - |
| 2R | 22650557 | 22651544 | peak_2768 | 19.07141 | 22651318 | FBtr0071861 | nsr-RA          | 762  | 22650556 | + |
| 3R | 30022384 | 30023087 | peak_5878 | 11.09627 | 30022742 | FBtr0085601 | RpS28a-RA       | 94   | 30022648 | - |
| 3R | 5780885  | 5781294  | peak_4549 | 10.58593 | 5781137  | FBtr0306153 | CG2082-RO       | 61   | 5781076  | - |
| 3L | 13009943 | 13010912 | peak_3743 | 13.77455 | 13010446 | FBtr0075899 | CG11261-RA      | 1239 | 13011685 | - |
| 2R | 16998349 | 16998939 | peak_2409 | 10.08448 | 16998649 | FBtr0344460 | CG30461-RK      | 55   | 16998594 | - |
| 3R | 23157518 | 23158210 | peak_5523 | 37.12309 | 23157931 | FBtr0337052 | unk-RF          | 69   | 23157862 | - |
| 2R | 21501694 | 21502323 | peak_2695 | 15.4749  | 21502097 | FBtr0071701 | TAF1C-like-RA   | 365  | 21501732 | - |

|    |          |          |           |          |          |             |              |       |          |   |
|----|----------|----------|-----------|----------|----------|-------------|--------------|-------|----------|---|
| 3L | 15588896 | 15590035 | peak_3866 | 12.14226 | 15589107 | FBtr0075568 | RhoGAP71E-RA | 247   | 15588860 | + |
| 2R | 7407505  | 7407973  | peak_1697 | 11.09627 | 7407839  | FBtr0089007 | Eaf-RD       | 20    | 7407819  | - |
| 2R | 12938065 | 12938542 | peak_2123 | 19.07141 | 12938346 | FBtr0087802 | CG30487-RA   | 3     | 12938343 | - |
| 3R | 30427816 | 30428444 | peak_5903 | 10.58593 | 30428207 | FBtr0339142 | CG2218-RB    | 29    | 30428178 | - |
| 2L | 5799928  | 5800420  | peak_572  | 12.14226 | 5800291  | FBtr0301234 | CG9171-RC    | 38    | 5800253  | - |
| 3R | 27937526 | 27938206 | peak_5798 | 10.08448 | 27938087 | FBtr0085253 | CG5514-RB    | 158   | 27938245 | + |
| 2L | 13395935 | 13396504 | peak_1086 | 10.58593 | 13396229 | FBtr0080523 | CG16957-RA   | 45    | 13396184 | - |
| 2L | 420057   | 420578   | peak_260  | 11.09627 | 420320   | FBtr0078056 | RpLP1-RA     | 368   | 419952   | + |
| 2L | 5596783  | 5597100  | peak_559  | 14.90051 | 5596917  | FBtr0079109 | CG18266-RA   | 84    | 5596833  | + |
| 2R | 13354107 | 13354645 | peak_2148 | 10.08448 | 13354484 | FBtr0302450 | CG17048-RB   | 15    | 13354499 | - |
| 2R | 21266032 | 21266481 | peak_2688 | 12.14226 | 21266224 | FBtr0071621 | CG30391-RA   | 118   | 21266342 | - |
| 2L | 2552455  | 2552955  | peak_371  | 13.77455 | 2552618  | FBtr0077750 | CG3515-RA    | 207   | 2552825  | - |
| 2R | 7825608  | 7826762  | peak_1751 | 12.14226 | 7826226  | FBtr0088839 | phr-RB       | 705   | 7825521  | + |
| 3L | 262541   | 262882   | peak_2990 | 11.61518 | 262722   | FBtr0332107 | Tudor-SN-RB  | 1658  | 264380   | - |
| 2R | 8599793  | 8600223  | peak_1802 | 10.08448 | 8599990  | FBtr0339357 | CG8735-RB    | 28    | 8599962  | - |
| 2R | 17564395 | 17565247 | peak_2446 | 11.61518 | 17564585 | FBtr0086827 | CG14480-RA   | 245   | 17564340 | + |
| 3L | 843890   | 844527   | peak_3024 | 31.18979 | 844094   | FBtr0332752 | CG13889-RB   | 168   | 843926   | + |
| 3L | 20265819 | 20266416 | peak_4150 | 10.58593 | 20266142 | FBtr0344956 | CR43876-RC   | 58    | 20266200 | - |
| 3R | 29122802 | 29123097 | peak_5835 | 11.09627 | 29122951 | FBtr0330292 | yem-RB       | 72    | 29122879 | - |
| 3R | 22402939 | 22403313 | peak_5489 | 26.95125 | 22403137 | FBtr0084224 | CG13856-RA   | 482   | 22402655 | + |
| 3R | 4389001  | 4389994  | peak_4408 | 11.09627 | 4389633  | FBtr0302339 | CG14646-RB   | 733   | 4390366  | + |
| 3R | 14655089 | 14655430 | peak_5082 | 10.08448 | 14655245 | FBtr0344158 | l(3)L1231-RD | 48    | 14655197 | - |
| 3L | 14410410 | 14410954 | peak_3799 | 14.90051 | 14410718 | FBtr0345393 | CR45233-RA   | 20    | 14410698 | - |
| 2L | 5668658  | 5670660  | peak_563  | 37.12309 | 5668996  | FBtr0079111 | Hsp60C-RC    | 6147  | 5662849  | + |
| 3L | 21532866 | 21533359 | peak_4233 | 12.67755 | 21533047 | FBtr0078383 | Mkrnl-RA     | 666   | 21533713 | - |
| 3R | 4796569  | 4797897  | peak_4445 | 14.90051 | 4797146  | FBtr0301437 | ctrip-RA     | 5696  | 4802842  | - |
| 3R | 20758131 | 20758485 | peak_5374 | 15.4749  | 20758297 | FBtr0334711 | Syp-RI       | 1568  | 20756729 | + |
| 3R | 19156735 | 19157075 | peak_5303 | 11.09627 | 19156912 | FBtr0335020 | CG11779-RE   | 100   | 19156812 | - |
| 2R | 16491081 | 16493050 | peak_2367 | 42.56455 | 16491488 | FBtr0087087 | S-Lap8-RA    | 388   | 16491100 | + |
| 3R | 29319295 | 29319794 | peak_5843 | 11.61518 | 29319608 | FBtr0334873 | Cnx99A-RE    | 10    | 29319598 | - |
| 2L | 1689854  | 1690858  | peak_310  | 25.57894 | 1690104  | FBtr0077881 | cpb-RA       | 14798 | 1704902  | + |
| 3L | 15053942 | 15054426 | peak_3824 | 32.64424 | 15054246 | FBtr0333874 | CG18649-RB   | 111   | 15054135 | - |
| 2R | 19399811 | 19400335 | peak_2580 | 13.22238 | 19400114 | FBtr0309059 | CR43430-RA   | 345   | 19399769 | + |
| 2R | 22075042 | 22075667 | peak_2735 | 12.67755 | 22075225 | FBtr0071800 | CG2921-RA    | 83    | 22075308 | - |
| 2R | 7938883  | 7939387  | peak_1755 | 11.61518 | 7939072  | FBtr0088882 | CG8728-RA    | 42    | 7939114  | - |
| 2L | 18859228 | 18859492 | peak_1327 | 14.3338  | 18859339 | FBtr0308069 | CG10602-RE   | 91    | 18859248 | - |
| 3L | 6979943  | 6980204  | peak_3354 | 10.08448 | 6980084  | FBtr0076934 | Galpai-RA    | 40    | 6980044  | - |
| 2L | 7232691  | 7232928  | peak_704  | 11.09627 | 7232787  | FBtr0332004 | CG43800-RA   | 26    | 7232813  | - |
| 3R | 25489067 | 25489457 | peak_5702 | 16.05663 | 25489261 | FBtr0330374 | Dhap-at-RB   | 1205  | 25490466 | - |
| 3R | 26468357 | 26471413 | peak_5749 | 10.08448 | 26470226 | FBtr0085016 | CG5455-RB    | 4686  | 26465540 | + |
| 2L | 8490157  | 8490486  | peak_789  | 10.58593 | 8490296  | FBtr0308708 | CG43400-RA   | 443   | 8490739  | + |



|    |          |          |           |           |          |             |               |       |          |   |
|----|----------|----------|-----------|-----------|----------|-------------|---------------|-------|----------|---|
| 2L | 254523   | 254832   | peak_240  | 12.67755  | 254732   | FBtr0336989 | CG3645-RC     | 18    | 254750   | - |
| 2L | 16257321 | 16257799 | peak_1176 | 14.3338   | 16257609 | FBtr0080856 | PRL-1-RB      | 3     | 16257606 | - |
| 2L | 20387047 | 20387647 | peak_1390 | 18.45464  | 20387447 | FBtr0081371 | CG16798-RA    | 5091  | 20382356 | - |
| 2L | 17047790 | 17048345 | peak_1249 | 20.32366  | 17048170 | FBtr0080954 | CG15136-RA    | 102   | 17048068 | - |
| 3L | 7241989  | 7242510  | peak_3361 | 19.07141  | 7242178  | FBtr0333367 | Neos-RB       | 361   | 7241817  | + |
| 2R | 6761106  | 6762057  | peak_1662 | 10.58593  | 6761577  | FBtr0086134 | CG9436-RA     | 2674  | 6758903  | - |
| 3R | 7474317  | 7475118  | peak_4628 | 130.69949 | 7474755  | FBtr0081559 | CG1142-RA     | 974   | 7473781  | - |
| 2R | 12180691 | 12181228 | peak_2055 | 10.08448  | 12180886 | FBtr0087989 | wash-RA       | 263   | 12180623 | + |
| 3R | 15263296 | 15263901 | peak_5119 | 19.07141  | 15263501 | FBtr0337054 | eIF-2gamma-RD | 43    | 15263458 | - |
| 3L | 19893249 | 19895463 | peak_4125 | 31.18979  | 19895056 | FBtr0304110 | CR32218-RA    | 1335  | 19896391 | - |
| 2R | 18862827 | 18863221 | peak_2542 | 10.08448  | 18862968 | FBtr0304817 | CG43069-RA    | 106   | 18862862 | + |
| 3R | 15004768 | 15005092 | peak_5098 | 12.14226  | 15004953 | FBtr0346233 | CR45599-RA    | 11    | 15004942 | - |
| 3R | 8820520  | 8820901  | peak_4703 | 11.09627  | 8820675  | FBtr0334659 | CG9821-RC     | 7     | 8820682  | - |
| 2L | 6153063  | 6155190  | peak_618  | 34.86029  | 6153353  | FBtr0079203 | Muc26B-RA     | 1384  | 6151969  | + |
| 2R | 8950887  | 8951490  | peak_1830 | 11.09627  | 8951030  | FBtr0307344 | CG33199-RB    | 56    | 8951086  | - |
| 2R | 7982212  | 7983413  | peak_1763 | 14.90051  | 7982545  | FBtr0339123 | ACC-RE        | 1518  | 7984063  | - |
| 3R | 14032444 | 14033035 | peak_5038 | 13.22238  | 14032617 | FBtr0082869 | CG3061-RA     | 246   | 14032371 | + |
| 2L | 4249519  | 4249902  | peak_469  | 21.60102  | 4249714  | FBtr0334789 | CR44059-RA    | 38    | 4249676  | - |
| 3R | 30306505 | 30306983 | peak_5898 | 17.24148  | 30306651 | FBtr0112496 | CG34300-RA    | 11    | 30306640 | - |
| 2R | 14413492 | 14413889 | peak_2241 | 19.07141  | 14413660 | FBtr0087487 | Sin1-RA       | 1835  | 14411825 | + |
| 3R | 25491547 | 25491979 | peak_5704 | 14.3338   | 25491676 | FBtr0084878 | CG5112-RA     | 216   | 25491460 | + |
| 3R | 22774747 | 22775060 | peak_5517 | 13.22238  | 22774866 | FBtr0309572 | mir-4953-RM   | 726   | 22774140 | + |
| 3L | 15072194 | 15072611 | peak_3825 | 11.61518  | 15072350 | FBtr0099993 | cp309-RC      | 199   | 15072151 | - |
| 2L | 1715630  | 1716097  | peak_314  | 16.05663  | 1715916  | FBtr0333545 | fritz-RD      | 65    | 1715851  | - |
| 3L | 1890796  | 1891288  | peak_3098 | 11.61518  | 1891100  | FBtr0072837 | Tmhs-RA       | 1610  | 1889490  | + |
| 2R | 10483714 | 10484484 | peak_1959 | 14.3338   | 10484288 | FBtr0343133 | pre-lola-G-RB | 967   | 10485255 | - |
| 3L | 12128089 | 12128955 | peak_3697 | 25.57894  | 12128784 | FBtr0089324 | Lsp2-RA       | 609   | 12129393 | + |
| 3R | 5194852  | 5195152  | peak_4459 | 12.14226  | 5195009  | FBtr0334910 | cno-RF        | 3289  | 5198298  | - |
| 3L | 6619016  | 6619449  | peak_3336 | 20.32366  | 6619284  | FBtr0076982 | GluRIA-RA     | 4748  | 6624032  | + |
| 2R | 15657783 | 15658070 | peak_2312 | 11.09627  | 15657907 | FBtr0304315 | mir-278-RM    | 841   | 15657066 | + |
| 2L | 12695895 | 12696434 | peak_1021 | 12.14226  | 12696008 | FBtr0340544 | PICK1-RF      | 172   | 12695836 | + |
| 3R | 6126613  | 6127062  | peak_4568 | 10.08448  | 6126883  | FBtr0309515 | CR43486-RA    | 7     | 6126876  | - |
| 2R | 6765402  | 6765908  | peak_1666 | 15.4749   | 6765788  | FBtr0329851 | Epac-RG       | 3970  | 6769758  | - |
| 2L | 16801795 | 16802091 | peak_1236 | 12.14226  | 16801898 | FBtr0344850 | Ugt36Bc-RC    | 2130  | 16799768 | + |
| 3R | 22794009 | 22794302 | peak_5518 | 17.24148  | 22794157 | FBtr0084313 | CG7031-RA     | 10134 | 22804291 | + |
| 3L | 6129636  | 6129905  | peak_3323 | 10.58593  | 6129793  | FBtr0346812 | l(3)mbn-RE    | 986   | 6128807  | - |
| 2R | 24523728 | 24524086 | peak_2902 | 15.4749   | 24523901 | FBtr0306137 | CG4612-RC     | 2188  | 24526089 | - |
| 2R | 12665761 | 12666141 | peak_2104 | 10.58593  | 12666001 | FBtr0339740 | nemy-RK       | 202   | 12665799 | - |
| 3L | 1822809  | 1823447  | peak_3092 | 14.90051  | 1823225  | FBtr0299561 | Cpr62Ba-RC    | 5717  | 1828942  | - |
| 3R | 21580141 | 21580421 | peak_5448 | 10.08448  | 21580282 | FBtr0290232 | InR-RD        | 9909  | 21590191 | - |
| 3R | 31457943 | 31458524 | peak_5935 | 10.08448  | 31458127 | FBtr0085810 | lox-RA        | 1742  | 31459869 | - |

Additional Data table S6 (separate excel file) List of 346 transcription start sites originated from cryptic promoters represented in Fig.4F  
(Questions: Jongmin Kim / devtxn@gmail.com)

- 1 Probe Set ID (Affy ChIP Drosophila 2, annotation version 32)
- 2 Matching Transcript ID (BDGP6.82)
- 3 Transcript coordinate
- 4 Transcript strand
- 5 TSS from cryptic promoter
- 6 Associated TSS for the background set used in motif analysis
- 7 Distance (Annotated promoter - cryptic promoter; negative means upstream)
- 8 Location of cryptic promoters with respect to annotated TSS
- 9 Presence of Aly Peaks in kmg KD
- 10 dMi-2\_KD\_has\_the\_same\_TSS

| 1                | 2                          | 3                       | 4                 | 5                         | 6                                          | 7            | 8                               | 9                          | 10                        |
|------------------|----------------------------|-------------------------|-------------------|---------------------------|--------------------------------------------|--------------|---------------------------------|----------------------------|---------------------------|
| Probe Set ID (A) | Matching Transcript ID (B) | Transcript coordinate   | Transcript strand | TSS from cryptic promoter | Associated TSS for the background set used | Distance (A) | Location of cryptic promoters w | Presence of Aly Peaks in k | dMi-2_KD_has_the_same_TSS |
| 1631795_at       | FBtr0113008                | chr2L:21918-23888       | -                 | chr2L:23727               | chr2L:84341                                | 161          | Downstream                      | No                         | Yes                       |
| 1624137_at       | FBtr0078098                | chr2L:320278-321246     | -                 | chr2L:321244              | chr2L:357844                               | 2            | Within 100bp                    | No                         | Yes                       |
| 1627476_at       | FBtr0078058                | chr2L:423451-425291     | +                 | chr2L:420794              | chr2L:439526                               | -2657        | Upstream                        | No                         | Yes                       |
| 1640627_at       | FBtr0078045                | chr2L:640020-714968     | -                 | chr2L:664824              | chr2L:730546                               | 50144        | Downstream                      | Yes                        | Yes                       |
| 1631563_at       | FBtr0331651                | chr2L:781275-782824     | +                 | chr2L:780525              | chr2L:799859                               | -750         | Upstream                        | Yes                        | Yes                       |
| 1635406_at       | FBtr0078042                | chr2L:786152-790795     | -                 | chr2L:790673              | chr2L:1158270                              | 122          | Downstream                      | Yes                        | Yes                       |
| 1633826_at       | FBtr0077986                | chr2L:1132329-1134120   | -                 | chr2L:1133748             | chr2L:1170362                              | 372          | Downstream                      | No                         | Yes                       |
| 1637772_at       | FBtr0077958                | chr2L:1143202-1147395   | +                 | chr2L:1142847             | chr2L:1158639                              | -355         | Upstream                        | Yes                        | Yes                       |
| 1626437_at       | FBtr0299676                | chr2L:2032634-2037247   | -                 | chr2L:2036973             | chr2L:2129231                              | 274          | Downstream                      | No                         | Yes                       |
| 1626238_at       | FBtr0301682                | chr2L:2674824-2719435   | +                 | chr2L:2704146             | chr2L:2752767                              | 29322        | Downstream                      | Yes                        | Yes                       |
| 1636572_at       | FBtr0300382                | chr2L:2816005-2821305   | -                 | chr2L:2825526             | chr2L:2857030                              | -4221        | Upstream                        | Yes                        | Yes                       |
| 1638081_at       | FBtr0077691                | chr2L:2834966-2837831   | -                 | chr2L:2842254             | chr2L:2874489                              | -4423        | Upstream                        | No                         | Yes                       |
| 1637486_at       | FBtr0077612                | chr2L:3173269-3173826   | -                 | chr2L:3174194             | chr2L:3365195                              | -368         | Upstream                        | No                         | Yes                       |
| 1628296_at       | FBtr0114524                | chr2L:3472734-3475338   | +                 | chr2L:3472919             | chr2L:3466099                              | 185          | Downstream                      | No                         | Yes                       |
| 1626891_at       | FBtr0077568                | chr2L:3480953-3481916   | -                 | chr2L:3481454             | chr2L:3514606                              | 462          | Downstream                      | Yes                        | Yes                       |
| 1627797_at       | FBtr0273188                | chr2L:3745691-3752190   | +                 | chr2L:3739624             | chr2L:3713371                              | -6067        | Upstream                        | Yes                        | No                        |
| 1627704_a_at     | FBtr0077429                | chr2L:4371989-4380725   | +                 | chr2L:4379459             | chr2L:4388333                              | 7470         | Downstream                      | No                         | Yes                       |
| 1636897_at       | FBtr0077434                | chr2L:4401104-4403091   | +                 | chr2L:4400721             | chr2L:4388289                              | -383         | Upstream                        | Yes                        | Yes                       |
| 1626903_at       | FBtr0077376                | chr2L:4651402-4652877   | +                 | chr2L:4651376             | chr2L:4619592                              | -26          | Within 100bp                    | No                         | No                        |
| 1635488_at       | FBtr0304910                | chr2L:4852864-4875233   | +                 | chr2L:4872095             | chr2L:4850426                              | 19231        | Downstream                      | Yes                        | Yes                       |
| 1633900_at       | FBtr0078990                | chr2L:4942747-4944305   | +                 | chr2L:4942757             | chr2L:4945568                              | 10           | Within 100bp                    | No                         | Yes                       |
| 1625654_at       | FBtr0089577                | chr2L:5559341-5563502   | +                 | chr2L:5559243             | chr2L:5553898                              | -98          | Within 100bp                    | No                         | Yes                       |
| 1638612_at       | FBtr0079163                | chr2L:5763459-5766141   | -                 | chr2L:5766734             | chr2L:5773595                              | -593         | Upstream                        | Yes                        | Yes                       |
| 1640990_at       | FBtr0079241                | chr2L:5956511-5956805   | -                 | chr2L:5957314             | chr2L:5981007                              | -509         | Upstream                        | Yes                        | Yes                       |
| 1623971_at       | FBtr0302123                | chr2L:6067838-6068579   | -                 | chr2L:6068705             | chr2L:6065938                              | -126         | Upstream                        | No                         | Yes                       |
| 1635232_at       | FBtr0079285                | chr2L:6263556-6264487   | -                 | chr2L:6264379             | chr2L:6127637                              | 108          | Downstream                      | No                         | Yes                       |
| 1638633_at       | FBtr0079281                | chr2L:6352323-6354593   | -                 | chr2L:6354535             | chr2L:6385495                              | 58           | Within 100bp                    | No                         | Yes                       |
| 1637777_at       | FBtr0079256                | chr2L:6412703-6414071   | +                 | chr2L:6401722             | chr2L:6491037                              | -10981       | Upstream                        | Yes                        | No                        |
| 1638360_at       | FBtr0079327                | chr2L:6625127-6632404   | -                 | chr2L:6632687             | chr2L:6656300                              | -283         | Upstream                        | Yes                        | No                        |
| 1628245_at       | FBtr0079341                | chr2L:6822316-6839005   | +                 | chr2L:6821255             | chr2L:6812619                              | -1061        | Upstream                        | Yes                        | Yes                       |
| 1634054_at       | FBtr0079436                | chr2L:7377717-7384344   | +                 | chr2L:7379956             | chr2L:7405233                              | 2239         | Downstream                      | Yes                        | Yes                       |
| 1638594_at       | FBtr0079458                | chr2L:7455007-7462247   | -                 | chr2L:7460247             | chr2L:7496288                              | 2000         | Downstream                      | Yes                        | Yes                       |
| 1629637_at       | FBtr0079507                | chr2L:7719907-7722227   | -                 | chr2L:7724626             | chr2L:7744813                              | -2399        | Upstream                        | No                         | Yes                       |
| 1628144_at       | FBtr0079605                | chr2L:8342763-8344310   | +                 | chr2L:8342544             | chr2L:8346619                              | -219         | Upstream                        | Yes                        | Yes                       |
| 1633995_at       | FBtr0303924                | chr2L:8476290-8477067   | +                 | chr2L:8474977             | chr2L:8515075                              | -1313        | Upstream                        | Yes                        | Yes                       |
| 1627637_at       | FBtr0303923                | chr2L:8482483-8488671   | +                 | chr2L:8482347             | chr2L:8517399                              | -136         | Upstream                        | Yes                        | Yes                       |
| 1630532_at       | FBtr0079684                | chr2L:8519689-8521733   | +                 | chr2L:8520896             | chr2L:8529108                              | 1207         | Downstream                      | Yes                        | Yes                       |
| 1638462_at       | FBtr0079759                | chr2L:8967536-8970264   | +                 | chr2L:8967405             | chr2L:9012856                              | -131         | Upstream                        | No                         | Yes                       |
| 1625245_at       | FBtr0079807                | chr2L:9416592-9426344   | +                 | chr2L:9423904             | chr2L:9427834                              | 7312         | Downstream                      | Yes                        | Yes                       |
| 1633591_at       | FBtr0079837                | chr2L:9608537-9612535   | +                 | chr2L:9610598             | chr2L:9613144                              | 2061         | Downstream                      | No                         | Yes                       |
| 1636818_at       | FBtr0079969                | chr2L:10091581-10092235 | -                 | chr2L:10094433            | chr2L:10125746                             | -2198        | Upstream                        | Yes                        | No                        |
| 1627678_at       | FBtr0080095                | chr2L:10534972-10536315 | +                 | chr2L:10534085            | chr2L:10517309                             | -887         | Upstream                        | No                         | Yes                       |
| 1630419_a_at     | FBtr0080125                | chr2L:10695208-10698024 | -                 | chr2L:10698100            | chr2L:10680465                             | -76          | Within 100bp                    | No                         | Yes                       |
| 1639559_at       | FBtr0273319                | chr2L:10725539-10728560 | +                 | chr2L:10726976            | chr2L:10728970                             | 1437         | Downstream                      | Yes                        | Yes                       |
| 1637338_at       | FBtr0080144                | chr2L:10870239-10870656 | +                 | chr2L:10870163            | chr2L:10864677                             | -76          | Within 100bp                    | No                         | Yes                       |
| 1634436_at       | FBtr0080234                | chr2L:11076151-11081397 | -                 | chr2L:11077938            | chr2L:11071501                             | 3459         | Downstream                      | Yes                        | Yes                       |

|              |             |                         |   |                |                 |        |              |     |     |
|--------------|-------------|-------------------------|---|----------------|-----------------|--------|--------------|-----|-----|
| 1629498_at   | FBtr0112856 | chr2L:11138800-11148875 | - | chr2L:11149588 | chr2L:11145420  | -713   | Upstream     | Yes | Yes |
| 1637140_at   | FBtr0332562 | chr2L:11254573-11256577 | + | chr2L:11255267 | chr2L:11277992  | 694    | Downstream   | Yes | Yes |
| 1640345_at   | FBtr0080214 | chr2L:11284585-11285603 | - | chr2L:11286046 | chr2L:11338991  | -443   | Upstream     | No  | Yes |
| 1624082_at   | FBtr0080280 | chr2L:11937968-11939202 | + | chr2L:11938474 | chr2L:11989937  | 506    | Downstream   | Yes | Yes |
| 1636420_at   | FBtr0080464 | chr2L:13347790-13348959 | + | chr2L:13347850 | chr2L:13286763  | 60     | Within 100bp | No  | Yes |
| 1641705_at   | FBtr0308949 | chr2L:13431936-13432432 | + | chr2L:13425960 | chr2L:13412530  | -5976  | Upstream     | Yes | No  |
| 1623817_at   | FBtr0080549 | chr2L:13846756-13847800 | + | chr2L:13846671 | chr2L:13840788  | -85    | Within 100bp | No  | No  |
| 1637403_at   | FBtr0080550 | chr2L:13847942-13849165 | + | chr2L:13847961 | chr2L:13905656  | 19     | Within 100bp | Yes | Yes |
| 1636007_at   | FBtr0080554 | chr2L:13909639-13911640 | + | chr2L:13909460 | chr2L:13912049  | -179   | Upstream     | No  | Yes |
| 1635937_at   | FBtr0080591 | chr2L:14027009-14029368 | + | chr2L:14027741 | chr2L:14008099  | 732    | Downstream   | Yes | Yes |
| 1638688_at   | FBtr0080704 | chr2L:15109584-15112914 | + | chr2L:15112160 | chr2L:15129700  | 2576   | Downstream   | No  | Yes |
| 1637986_at   | FBtr0080782 | chr2L:15615518-15616333 | - | chr2L:15618679 | chr2L:15516670  | -2346  | Upstream     | No  | Yes |
| 1631444_a_at | FBtr0080781 | chr2L:15619663-15623558 | - | chr2L:15625007 | chr2L:15751066  | -1449  | Upstream     | Yes | Yes |
| 1633366_at   | FBtr0303797 | chr2L:16235619-16239923 | + | chr2L:16237776 | chr2L:16211420  | 2157   | Downstream   | Yes | No  |
| 1628177_at   | FBtr0080859 | chr2L:16365918-16366977 | + | chr2L:16366288 | chr2L:16352933  | 370    | Downstream   | No  | No  |
| 1626937_s_at | FBtr0080945 | chr2L:16664860-16676666 | - | chr2L:16666567 | chr2L:16727786  | 10099  | Downstream   | Yes | Yes |
| 1628716_at   | FBtr0080928 | chr2L:16835259-16837218 | - | chr2L:16836678 | chr2L:16831673  | 540    | Downstream   | Yes | Yes |
| 1638983_at   | FBtr0273418 | chr2L:17964128-17982312 | - | chr2L:17977087 | chr2L:18011487  | 5225   | Downstream   | Yes | No  |
| 1631097_at   | FBtr0081045 | chr2L:18090940-18092238 | - | chr2L:18092456 | chr2L:18443266  | -218   | Upstream     | Yes | Yes |
| 1625858_at   | FBtr0300025 | chr2L:18124127-18125435 | - | chr2L:18124742 | chr2L:18605211  | 693    | Downstream   | Yes | No  |
| 1637395_at   | FBtr0081240 | chr2L:19484972-19486396 | + | chr2L:19484231 | chr2L:19454849  | -741   | Upstream     | Yes | Yes |
| 1641113_at   | FBtr0081242 | chr2L:19487523-19488531 | + | chr2L:19487048 | chr2L:19493222  | -475   | Upstream     | No  | Yes |
| 1641071_at   | FBtr0085988 | chr2R:6179719-6180370   | + | chr2R:61797160 | chr2R:6200756   | -559   | Upstream     | No  | Yes |
| 1635384_at   | FBtr0086139 | chr2R:6716344-6717807   | - | chr2R:6717646  | chr2R:6696640   | 161    | Downstream   | No  | Yes |
| 1631123_at   | FBtr0088909 | chr2R:7554872-7561254   | + | chr2R:7556602  | chr2R:7535905   | 1730   | Downstream   | No  | No  |
| 1627272_at   | FBtr0088881 | chr2R:7939252-7939558   | - | chr2R:7939694  | chr2R:7939978   | -136   | Upstream     | No  | Yes |
| 1625307_at   | FBtr0088778 | chr2R:8087415-8089297   | + | chr2R:8088460  | chr2R:8089456   | 1045   | Downstream   | No  | No  |
| 1639401_at   | FBtr0088759 | chr2R:8449660-8451899   | - | chr2R:8452028  | chr2R:8441140   | -129   | Upstream     | No  | Yes |
| 1639262_at   | FBtr0088757 | chr2R:8469548-8472297   | - | chr2R:8472228  | chr2R:8453544   | 69     | Within 100bp | No  | Yes |
| 1639262_at   | FBtr0088752 | chr2R:8471964-8473943   | + | chr2R:8471196  | chr2R:8570477   | -768   | Upstream     | Yes | Yes |
| 1639043_at   | FBtr0112560 | chr2R:8993541-8994475   | - | chr2R:8994715  | chr2R:8957047   | -240   | Upstream     | Yes | Yes |
| 1637354_at   | FBtr0301191 | chr2R:9007570-9013508   | - | chr2R:9013671  | chr2R:9019024   | -163   | Upstream     | No  | Yes |
| 1639331_at   | FBtr0303149 | chr2R:10362304-10363584 | + | chr2R:10362189 | chr2R:10418676  | -115   | Upstream     | No  | Yes |
| 1630241_at   | FBtr0088121 | chr2R:11336847-11337796 | + | chr2R:11325530 | chr2R:113256472 | -11317 | Upstream     | Yes | Yes |
| 1623093_at   | FBtr0088039 | chr2R:11939483-11966201 | + | chr2R:11946961 | chr2R:11899493  | 7478   | Downstream   | Yes | Yes |
| 1630389_at   | FBtr0088019 | chr2R:12143349-12144434 | - | chr2R:12144588 | chr2R:12151018  | -154   | Upstream     | No  | Yes |
| 1634139_at   | FBtr0087824 | chr2R:12566186-12569061 | + | chr2R:12567974 | chr2R:12567055  | 1788   | Downstream   | Yes | Yes |
| 1639956_at   | FBtr0110824 | chr2R:12625832-12628619 | + | chr2R:12626833 | chr2R:12632607  | 1001   | Downstream   | No  | Yes |
| 1624106_at   | FBtr0087815 | chr2R:12872783-12875013 | - | chr2R:12873581 | chr2R:12879772  | 1432   | Downstream   | No  | Yes |
| 1623484_at   | FBtr0087785 | chr2R:12884288-12899395 | + | chr2R:12895856 | chr2R:12880248  | 11568  | Downstream   | Yes | No  |
| 1641643_at   | FBtr0330330 | chr2R:13146212-13148280 | - | chr2R:13148399 | chr2R:13198308  | -119   | Upstream     | Yes | Yes |
| 1632419_at   | FBtr0299765 | chr2R:13435081-13436797 | - | chr2R:13438740 | chr2R:13393347  | -1943  | Upstream     | Yes | No  |
| 1631265_at   | FBtr0087628 | chr2R:13755343-13758857 | + | chr2R:13756818 | chr2R:13778110  | 1475   | Downstream   | Yes | No  |
| 1625228_at   | FBtr0087577 | chr2R:14198999-14200721 | - | chr2R:14200775 | chr2R:14216606  | -54    | Within 100bp | No  | Yes |
| 1638775_at   | FBtr0087537 | chr2R:14247961-14252387 | + | chr2R:14248683 | chr2R:14361949  | 722    | Downstream   | No  | Yes |
| 1630462_at   | FBtr0087556 | chr2R:14374571-14375143 | - | chr2R:14375864 | chr2R:14360267  | -721   | Upstream     | Yes | Yes |
| 1628411_at   | FBtr0302926 | chr2R:14458735-14465457 | + | chr2R:14464212 | chr2R:14503942  | 5477   | Downstream   | Yes | No  |
| 1631327_at   | FBtr0087477 | chr2R:14671938-14713621 | - | chr2R:14686055 | chr2R:14658755  | 27566  | Downstream   | Yes | Yes |
| 1637539_a_at | FBtr0087414 | chr2R:15011397-15041378 | + | chr2R:15034413 | chr2R:14981203  | 23016  | Downstream   | No  | Yes |
| 1634821_at   | FBtr0087329 | chr2R:15504200-15506000 | + | chr2R:15502878 | chr2R:15511685  | -1322  | Upstream     | Yes | Yes |
| 1625982_at   | FBtr0087209 | chr2R:16031959-16045937 | + | chr2R:16031938 | chr2R:16047580  | -21    | Within 100bp | No  | Yes |
| 1639152_at   | FBtr0289985 | chr2R:16171241-16176653 | - | chr2R:16184110 | chr2R:16170844  | -7457  | Upstream     | No  | No  |
| 1636873_at   | FBtr0087138 | chr2R:16283434-16287450 | + | chr2R:16285234 | chr2R:16288962  | 1800   | Downstream   | Yes | Yes |
| 1630014_at   | FBtr0112650 | chr2R:16312242-16316220 | + | chr2R:16309704 | chr2R:16336739  | -2538  | Upstream     | Yes | Yes |
| 1623711_at   | FBtr0087116 | chr2R:16653204-16655046 | - | chr2R:16654787 | chr2R:16667649  | 259    | Downstream   | No  | Yes |
| 1637807_at   | FBtr0087047 | chr2R:16898582-16901578 | + | chr2R:16898615 | chr2R:16955455  | 33     | Within 100bp | No  | Yes |
| 1639167_at   | FBtr0086865 | chr2R:17744661-17745861 | + | chr2R:17744189 | chr2R:17750303  | -472   | Upstream     | No  | Yes |
| 1635494_at   | FBtr0302291 | chr2R:17887212-17889972 | - | chr2R:17891790 | chr2R:17956561  | -1818  | Upstream     | Yes | Yes |
| 1626455_s_at | FBtr0344762 | chr2R:18047623-18048800 | + | chr2R:18048007 | chr2R:18042747  | 384    | Downstream   | No  | Yes |
| 1629530_at   | FBtr0086729 | chr2R:18382695-18383232 | - | chr2R:18383376 | chr2R:18385601  | -144   | Upstream     | No  | No  |
| 1629693_at   | FBtr0086613 | chr2R:18783300-18794600 | + | chr2R:18789098 | chr2R:18802380  | 5798   | Downstream   | No  | No  |
| 1637910_at   | FBtr0086595 | chr2R:19094266-19096174 | - | chr2R:19096995 | chr2R:19129292  | -821   | Upstream     | Yes | Yes |

|              |             |                         |   |                |                 |        |              |     |     |
|--------------|-------------|-------------------------|---|----------------|-----------------|--------|--------------|-----|-----|
| 1637907_at   | FBtr0086562 | chr2R:19287982-19288645 | + | chr2R:19287952 | chr2R:19283957  | -30    | Within 100bp | No  | Yes |
| 1634103_at   | FBtr0086466 | chr2R:19509767-19511471 | + | chr2R:19510304 | chr2R:19501277  | 537    | Downstream   | Yes | Yes |
| 1635194_at   | FBtr0086323 | chr2R:20238569-20239100 | - | chr2R:20239165 | chr2R:20212628  | -65    | Within 100bp | No  | Yes |
| 1627128_at   | FBtr0086321 | chr2R:20245925-20247573 | - | chr2R:20247137 | chr2R:20257366  | 436    | Downstream   | No  | Yes |
| 1623759_at   | FBtr0086267 | chr2R:20539601-20540401 | - | chr2R:20540680 | chr2R:20536483  | -279   | Upstream     | No  | Yes |
| 1635894_at   | FBtr0086266 | chr2R:20547029-20547681 | - | chr2R:20547668 | chr2R:20587231  | 13     | Within 100bp | No  | Yes |
| 1624000_at   | FBtr0086239 | chr2R:20773728-20775113 | + | chr2R:20774438 | chr2R:20644012  | 710    | Downstream   | Yes | Yes |
| 1622901_at   | FBtr0071560 | chr2R:20851266-20852043 | - | chr2R:20852289 | chr2R:20869313  | -246   | Upstream     | Yes | Yes |
| 1640308_a_at | FBtr0273397 | chr2R:20986832-20991171 | - | chr2R:20988577 | chr2R:20943973  | 2594   | Downstream   | No  | Yes |
| 1624344_at   | FBtr0071675 | chr2R:21692680-21697152 | - | chr2R:21694041 | chr2R:21694240  | 3111   | Downstream   | No  | Yes |
| 1638473_at   | FBtr0071743 | chr2R:21799326-21800900 | - | chr2R:21801602 | chr2R:21796366  | -702   | Upstream     | Yes | Yes |
| 1630740_at   | FBtr0071740 | chr2R:21834298-21835029 | - | chr2R:21835362 | chr2R:21882567  | -333   | Upstream     | No  | Yes |
| 1624736_a_at | FBtr0071811 | chr2R:22293458-22296955 | + | chr2R:22294748 | chr2R:22311929  | 1290   | Downstream   | Yes | No  |
| 1628454_at   | FBtr0071830 | chr2R:22427478-22429584 | + | chr2R:22426202 | chr2R:22420375  | -1276  | Upstream     | No  | No  |
| 1638823_at   | FBtr0071921 | chr2R:22701443-22704398 | - | chr2R:22704270 | chr2R:22707780  | 128    | Downstream   | No  | Yes |
| 1626959_at   | FBtr0071871 | chr2R:22704709-22705568 | + | chr2R:22832611 | chr2R:22799073  | 127902 | Downstream   | No  | Yes |
| 1625203_at   | FBtr0071894 | chr2R:22840834-22842465 | + | chr2R:22840737 | chr2R:22837348  | -97    | Within 100bp | No  | Yes |
| 1640390_at   | FBtr0303785 | chr2R:22846117-22847843 | + | chr2R:22845947 | chr2R:22882680  | -170   | Upstream     | No  | Yes |
| 1638319_at   | FBtr0071909 | chr2R:22855687-22858794 | - | chr2R:22857289 | chr2R:22886309  | 1505   | Downstream   | Yes | No  |
| 1625779_at   | FBtr0071898 | chr2R:22866520-22870706 | + | chr2R:22868065 | chr2R:22868846  | 1545   | Downstream   | No  | No  |
| 1640407_at   | FBtr0071989 | chr2R:22985529-22986328 | - | chr2R:22986337 | chr2R:22937764  | -9     | Within 100bp | No  | Yes |
| 1633708_at   | FBtr0071965 | chr2R:23082202-23083366 | + | chr2R:23082160 | chr2R:23067192  | -42    | Within 100bp | No  | Yes |
| 1639287_at   | FBtr0071980 | chr2R:23085878-23086261 | - | chr2R:23086346 | chr2R:23100452  | -85    | Within 100bp | No  | Yes |
| 1622900_at   | FBtr0071976 | chr2R:23103940-23105169 | - | chr2R:23104777 | chr2R:23152701  | 392    | Downstream   | Yes | Yes |
| 1625058_at   | FBtr0072011 | chr2R:23378532-23380438 | + | chr2R:23377908 | chr2R:23377044  | -624   | Upstream     | No  | Yes |
| 1629932_at   | FBtr0072012 | chr2R:23381198-23382593 | + | chr2R:23381112 | chr2R:23432014  | -86    | Within 100bp | Yes | Yes |
| 1632701_at   | FBtr0301509 | chr2R:23688157-23690319 | + | chr2R:23688111 | chr2R:23685549  | -46    | Within 100bp | No  | Yes |
| 1638251_at   | FBtr0301162 | chr2R:23829995-23837340 | + | chr2R:23829853 | chr2R:23851060  | -142   | Upstream     | Yes | Yes |
| 1623006_at   | FBtr0072362 | chr2R:24404594-24410547 | - | chr2R:24412377 | chr2R:24498040  | -1830  | Upstream     | No  | Yes |
| 1641220_at   | FBtr0343482 | chr2R:24415570-24418672 | - | chr2R:24419653 | chr2R:24531580  | -981   | Upstream     | No  | Yes |
| 1625498_at   | FBtr0072353 | chr2R:24493255-24493948 | - | chr2R:24494163 | chr2R:244961093 | -215   | Upstream     | No  | Yes |
| 1625039_at   | FBtr0302288 | chr2R:24515724-24521147 | + | chr2R:24520388 | chr2R:24870087  | 4664   | Downstream   | Yes | Yes |
| 1630237_a_at | FBtr0072378 | chr2R:24814829-24834602 | + | chr2R:24813950 | chr2R:24875842  | -879   | Upstream     | Yes | No  |
| 1635524_at   | FBtr0072413 | chr2R:24928746-24937452 | - | chr2R:24932289 | chr2R:24881540  | 5163   | Downstream   | Yes | No  |
| 1627096_s_at | FBtr0343605 | chr2R:25085779-25139541 | - | chr2R:25139829 | chr2R:24983199  | -288   | Upstream     | Yes | Yes |
| 1623396_at   | FBtr0072476 | chr3L:180293-182535     | + | chr3L:180236   | chr3L:176224    | -57    | Within 100bp | No  | Yes |
| 1630356_at   | FBtr0333961 | chr3L:277713-282719     | + | chr3L:278223   | chr3L:257926    | 510    | Downstream   | Yes | Yes |
| 1625238_at   | FBtr0072744 | chr3L:1565391-1567802   | + | chr3L:1565292  | chr3L:1569163   | -99    | Within 100bp | No  | No  |
| 1640809_at   | FBtr0072824 | chr3L:1610694-1616602   | - | chr3L:1615415  | chr3L:1645183   | 1187   | Downstream   | Yes | No  |
| 1640524_at   | FBtr0072821 | chr3L:1623177-1629298   | - | chr3L:1628365  | chr3L:1731098   | 933    | Downstream   | No  | Yes |
| 1636135_at   | FBtr0072802 | chr3L:1701394-1701883   | - | chr3L:1701975  | chr3L:1775140   | -92    | Within 100bp | No  | Yes |
| 1638896_at   | FBtr0072869 | chr3L:1840277-1842080   | - | chr3L:1841227  | chr3L:1775622   | 853    | Downstream   | Yes | Yes |
| 1623022_at   | FBtr0072913 | chr3L:2173060-2174332   | - | chr3L:2173929  | chr3L:1857175   | 403    | Downstream   | Yes | No  |
| 1638174_at   | FBtr0072938 | chr3L:2648049-2650207   | + | chr3L:2648432  | chr3L:2257417   | 383    | Downstream   | Yes | Yes |
| 1626183_at   | FBtr0309119 | chr3L:2788121-2800130   | - | chr3L:2796258  | chr3L:2782268   | 3872   | Downstream   | Yes | No  |
| 1639636_at   | FBtr0073124 | chr3L:3090984-3106956   | - | chr3L:3106974  | chr3L:2892110   | -18    | Within 100bp | No  | Yes |
| 1625336_s_at | FBtr0304829 | chr3L:3483910-3484620   | - | chr3L:3484846  | chr3L:3461289   | -226   | Upstream     | No  | Yes |
| 1634928_at   | FBtr0073141 | chr3L:3510972-3512677   | - | chr3L:3512716  | chr3L:3515722   | -39    | Within 100bp | No  | Yes |
| 1635410_at   | FBtr0073172 | chr3L:3938694-3940084   | - | chr3L:3940119  | chr3L:3937965   | -35    | Within 100bp | No  | Yes |
| 1630860_at   | FBtr0073165 | chr3L:3983915-3988589   | + | chr3L:3984099  | chr3L:3962937   | 184    | Downstream   | No  | Yes |
| 1625523_at   | FBtr0073192 | chr3L:4019093-4021179   | + | chr3L:4018980  | chr3L:4021420   | -113   | Upstream     | No  | Yes |
| 1627818_s_at | FBtr0073275 | chr3L:4074072-4088744   | - | chr3L:4088418  | chr3L:4103572   | 326    | Downstream   | No  | Yes |
| 1639190_at   | FBtr0332659 | chr3L:4161653-4167461   | - | chr3L:4166856  | chr3L:4136026   | 605    | Downstream   | No  | No  |
| 1636393_at   | FBtr0073255 | chr3L:4200819-4204338   | - | chr3L:4203342  | chr3L:4186858   | 996    | Downstream   | Yes | No  |
| 1629394_at   | FBtr0073253 | chr3L:4211000-4211553   | - | chr3L:4211600  | chr3L:4242726   | -47    | Within 100bp | Yes | Yes |
| 1628265_a_at | FBtr0304988 | chr3L:4574980-4590784   | + | chr3L:4588050  | chr3L:4746659   | 13070  | Downstream   | Yes | Yes |
| 1630621_at   | FBtr0077163 | chr3L:5131549-5132129   | + | chr3L:5131223  | chr3L:5141642   | -326   | Upstream     | Yes | Yes |
| 1633636_at   | FBtr0077153 | chr3L:5378785-5382821   | - | chr3L:5380359  | chr3L:5535721   | 2462   | Downstream   | Yes | No  |
| 1631100_at   | FBtr0077149 | chr3L:5512420-5529341   | - | chr3L:5516942  | chr3L:5577332   | 12399  | Downstream   | Yes | Yes |
| 1637660_at   | FBtr0077086 | chr3L:5595545-5597352   | + | chr3L:5596224  | chr3L:5608305   | 679    | Downstream   | Yes | Yes |
| 1631236_at   | FBtr0077090 | chr3L:5654682-5657384   | + | chr3L:5652328  | chr3L:5752957   | -2354  | Upstream     | Yes | No  |
| 1627937_at   | FBtr0305274 | chr3L:5903061-5904001   | - | chr3L:5903746  | chr3L:5902467   | 255    | Downstream   | Yes | Yes |

|              |             |                         |   |                |                |        |              |     |     |
|--------------|-------------|-------------------------|---|----------------|----------------|--------|--------------|-----|-----|
| 1629860_at   | FBtr0077039 | chr3L:6037110-6038070   | + | chr3L:6037198  | chr3L:6055129  | 88     | Within 100bp | Yes | Yes |
| 1636460_at   | FBtr0077067 | chr3L:6053583-6054426   | - | chr3L:6054576  | chr3L:6075536  | -150   | Upstream     | Yes | Yes |
| 1629726_at   | FBtr0077066 | chr3L:6061376-6062906   | - | chr3L:60663105 | chr3L:6173871  | -199   | Upstream     | Yes | No  |
| 1639720_at   | FBtr0299610 | chr3L:6069468-6071371   | + | chr3L:6068108  | chr3L:6193177  | -1360  | Upstream     | Yes | No  |
| 1637998_at   | FBtr0076996 | chr3L:6160813-6161589   | + | chr3L:6160811  | chr3L:6262678  | -2     | Within 100bp | Yes | Yes |
| 1632356_at   | FBtr0300026 | chr3L:6666637-6667927   | - | chr3L:6667106  | chr3L:6756467  | 821    | Downstream   | Yes | No  |
| 1636659_at   | FBtr0076909 | chr3L:7093208-7093843   | + | chr3L:7093256  | chr3L:7131820  | 48     | Within 100bp | No  | Yes |
| 1626194_at   | FBtr0100141 | chr3L:7134517-7142735   | + | chr3L:7134480  | chr3L:7234475  | -37    | Within 100bp | No  | Yes |
| 1634540_at   | FBtr0332140 | chr3L:7491863-7493484   | + | chr3L:7490247  | chr3L:7465470  | -1616  | Upstream     | No  | Yes |
| 1626859_at   | FBtr0076828 | chr3L:7540268-7541168   | - | chr3L:7541216  | chr3L:7641637  | -48    | Within 100bp | No  | Yes |
| 1624389_at   | FBtr0290277 | chr3L:7564334-7569494   | + | chr3L:7562606  | chr3L:7654768  | -1728  | Upstream     | No  | Yes |
| 1633313_at   | FBtr0336853 | chr3L:7655388-7697661   | - | chr3L:7696412  | chr3L:7719350  | 1249   | Downstream   | Yes | No  |
| 1633123_at   | FBtr0076716 | chr3L:8290285-8295322   | - | chr3L:8292974  | chr3L:8289861  | 2348   | Downstream   | Yes | No  |
| 1631774_at   | FBtr0076601 | chr3L:8337586-8338148   | + | chr3L:8337360  | chr3L:8346389  | -226   | Upstream     | No  | Yes |
| 1635732_at   | FBtr0305700 | chr3L:8473006-8481062   | - | chr3L:8480969  | chr3L:8509732  | 93     | Within 100bp | Yes | No  |
| 1629380_at   | FBtr0076574 | chr3L:8731990-8732541   | + | chr3L:8730842  | chr3L:8956755  | -1148  | Upstream     | Yes | Yes |
| 1629935_at   | FBtr0076587 | chr3L:8805827-8807198   | - | chr3L:8807315  | chr3L:9364343  | -117   | Upstream     | Yes | Yes |
| 1624259_at   | FBtr0076440 | chr3L:9354335-9355338   | + | chr3L:9354283  | chr3L:9429831  | -52    | Within 100bp | No  | Yes |
| 1630049_at   | FBtr0076452 | chr3L:9375428-9376269   | + | chr3L:9375117  | chr3L:9487783  | -311   | Upstream     | No  | Yes |
| 1639254_at   | FBtr0114525 | chr3L:9488137-9489297   | - | chr3L:9489200  | chr3L:9505958  | 97     | Within 100bp | Yes | Yes |
| 1639627_at   | FBtr0091691 | chr3L:9512007-9513959   | - | chr3L:9513963  | chr3L:9610494  | -4     | Within 100bp | No  | Yes |
| 1633009_a_at | FBtr0303833 | chr3L:10095746-10100881 | - | chr3L:10097234 | chr3L:10151808 | 3647   | Downstream   | No  | Yes |
| 1638525_at   | FBtr0076300 | chr3L:10243319-10244706 | - | chr3L:10244227 | chr3L:10215636 | 479    | Downstream   | Yes | No  |
| 1640580_at   | FBtr0345037 | chr3L:11233000-11235938 | - | chr3L:11235126 | chr3L:11214516 | 812    | Downstream   | No  | Yes |
| 1638012_at   | FBtr0076146 | chr3L:11584116-11587768 | - | chr3L:11592891 | chr3L:11584073 | -5123  | Upstream     | Yes | No  |
| 1626309_at   | FBtr0076119 | chr3L:11767300-11772081 | - | chr3L:11768801 | chr3L:11793511 | 3280   | Downstream   | No  | Yes |
| 1634498_at   | FBtr0076026 | chr3L:12125486-12127394 | - | chr3L:12127327 | chr3L:12136727 | 67     | Within 100bp | Yes | Yes |
| 1625864_at   | FBtr0075953 | chr3L:12329235-12335906 | + | chr3L:12334736 | chr3L:12336636 | 5501   | Downstream   | Yes | No  |
| 1629066_at   | FBtr0330069 | chr3L:12339111-12351536 | - | chr3L:12342338 | chr3L:12414834 | 9198   | Downstream   | Yes | No  |
| 1623932_at   | FBtr0075935 | chr3L:12853655-12856904 | + | chr3L:12853598 | chr3L:12850197 | -57    | Within 100bp | Yes | Yes |
| 1640837_a_at | FBtr0075842 | chr3L:13382766-13384001 | + | chr3L:13381703 | chr3L:13412833 | -1063  | Upstream     | Yes | Yes |
| 1640192_at   | FBtr0089524 | chr3L:14186367-14189422 | - | chr3L:14189245 | chr3L:14246003 | 177    | Downstream   | Yes | Yes |
| 1625059_at   | FBtr0075722 | chr3L:14560133-14560764 | - | chr3L:14560790 | chr3L:14632072 | -26    | Within 100bp | No  | Yes |
| 1631611_at   | FBtr0100028 | chr3L:15528356-15529230 | - | chr3L:15529307 | chr3L:15554085 | -77    | Within 100bp | Yes | Yes |
| 1624428_at   | FBtr0075574 | chr3L:15659706-15660212 | + | chr3L:15659527 | chr3L:15816401 | -179   | Upstream     | Yes | Yes |
| 1641631_at   | FBtr0075469 | chr3L:16301469-16302028 | + | chr3L:16296280 | chr3L:16384049 | -5189  | Upstream     | Yes | Yes |
| 1641146_at   | FBtr0075391 | chr3L:16497653-16500467 | + | chr3L:16497653 | chr3L:16581543 | 0      | Within 100bp | No  | Yes |
| 1627607_at   | FBtr0075392 | chr3L:16556842-16557958 | + | chr3L:16556772 | chr3L:16938956 | -70    | Within 100bp | Yes | Yes |
| 1630210_at   | FBtr0113177 | chr3L:16941691-16945753 | + | chr3L:16944271 | chr3L:17016168 | 2580   | Downstream   | Yes | Yes |
| 1625216_at   | FBtr0075214 | chr3L:17322840-17324493 | + | chr3L:17322670 | chr3L:17425186 | -170   | Upstream     | Yes | Yes |
| 1635742_s_at | FBtr0075239 | chr3L:17367750-17379529 | - | chr3L:17374767 | chr3L:18301220 | 4762   | Downstream   | Yes | No  |
| 1629263_at   | FBtr0075134 | chr3L:18154892-18162515 | - | chr3L:18161753 | chr3L:18950593 | 762    | Downstream   | Yes | No  |
| 1629846_at   | FBtr0075046 | chr3L:18986058-18988158 | - | chr3L:18988397 | chr3L:19000589 | -239   | Upstream     | Yes | Yes |
| 1641688_at   | FBtr0075040 | chr3L:19001081-19003293 | - | chr3L:19002043 | chr3L:19063155 | 1250   | Downstream   | Yes | No  |
| 1624519_at   | FBtr0074949 | chr3L:19687627-19689992 | + | chr3L:19688222 | chr3L:19687330 | 595    | Downstream   | No  | Yes |
| 1624772_at   | FBtr0074870 | chr3L:20098080-20103807 | - | chr3L:20101652 | chr3L:20129181 | 2155   | Downstream   | Yes | Yes |
| 1633365_at   | FBtr0074869 | chr3L:20108783-20111437 | - | chr3L:20111661 | chr3L:20242486 | -224   | Upstream     | Yes | Yes |
| 1623981_at   | FBtr0074856 | chr3L:20210434-20212118 | - | chr3L:20212565 | chr3L:20296945 | -447   | Upstream     | No  | Yes |
| 1631668_at   | FBtr0310467 | chr3L:20224612-20225293 | + | chr3L:20224343 | chr3L:21205202 | -269   | Upstream     | No  | Yes |
| 1625852_at   | FBtr0074848 | chr3L:20268858-20295131 | - | chr3L:20276513 | chr3L:21213692 | 18618  | Downstream   | Yes | No  |
| 1626529_at   | FBtr0299857 | chr3L:21184661-21186675 | - | chr3L:21186036 | chr3L:21357623 | 639    | Downstream   | Yes | No  |
| 1624829_at   | FBtr0301013 | chr3L:21428058-21432994 | + | chr3L:21427817 | chr3L:21433403 | -241   | Upstream     | Yes | Yes |
| 1623243_at   | FBtr0078396 | chr3L:21442222-21444814 | - | chr3L:21444839 | chr3L:21441344 | -25    | Within 100bp | No  | Yes |
| 1627951_at   | FBtr0305327 | chr3L:21534578-21536229 | + | chr3L:21533244 | chr3L:21533729 | -1334  | Upstream     | Yes | Yes |
| 1640593_at   | FBtr0078457 | chr3L:21729669-21730449 | - | chr3L:21730280 | chr3L:21680014 | 169    | Downstream   | Yes | No  |
| 1633562_at   | FBtr0078456 | chr3L:21730723-21731547 | - | chr3L:21731871 | chr3L:21823452 | -324   | Upstream     | Yes | Yes |
| 1632242_a_at | FBtr0333892 | chr3L:21746503-21761199 | - | chr3L:21774656 | chr3L:21832226 | -13457 | Upstream     | Yes | Yes |
| 1637434_at   | FBtr0078444 | chr3L:21841906-21842355 | - | chr3L:21842374 | chr3L:21841340 | -19    | Within 100bp | No  | Yes |
| 1637669_at   | FBtr0078471 | chr3L:21934962-21938517 | + | chr3L:21934779 | chr3L:22071840 | -183   | Upstream     | Yes | Yes |
| 1624921_at   | FBtr0331779 | chr3L:22582913-22583653 | - | chr3L:22584557 | chr3L:22717577 | -904   | Upstream     | Yes | Yes |
| 1630625_s_at | FBtr0303714 | chr3L:22650890-22655489 | - | chr3L:22651948 | chr3L:22724197 | 3541   | Downstream   | Yes | No  |
| 1625894_at   | FBtr0078522 | chr3L:22712156-22713663 | + | chr3L:22711741 | chr3L:22868257 | -415   | Upstream     | Yes | No  |

|              |             |                         |   |                 |                |        |              |     |     |
|--------------|-------------|-------------------------|---|-----------------|----------------|--------|--------------|-----|-----|
| 1628611_at   | FBtr0078536 | chr3L:22734429-22738417 | - | chr3L:22741422  | chr3L:22872212 | -3005  | Upstream     | No  | Yes |
| 1636249_at   | FBtr0078789 | chr3R:5376753-5377975   | + | chr3R:5376753   | chr3R:5368305  | 0      | Within 100bp | No  | Yes |
| 1629522_at   | FBtr0078594 | chr3R:6215835-6217953   | + | chr3R:6215551   | chr3R:6057513  | -284   | Upstream     | Yes | Yes |
| 1623290_at   | FBtr0078615 | chr3R:6218317-6221781   | - | chr3R:6222136   | chr3R:6341938  | -355   | Upstream     | Yes | No  |
| 1628121_at   | FBtr0078606 | chr3R:6299131-6300750   | + | chr3R:6299939   | chr3R:6343993  | 808    | Downstream   | No  | No  |
| 1633077_at   | FBtr0081708 | chr3R:6340096-6341430   | + | chr3R:6339713   | chr3R:6368928  | -383   | Upstream     | No  | Yes |
| 1631233_at   | FBtr0081713 | chr3R:6349242-6350512   | + | chr3R:6349242   | chr3R:6380226  | 0      | Within 100bp | No  | Yes |
| 1624703_at   | FBtr0089277 | chr3R:6708207-6713026   | - | chr3R:6719339   | chr3R:6406833  | -6313  | Upstream     | Yes | No  |
| 1637062_at   | FBtr0081777 | chr3R:7783941-7786119   | - | chr3R:7786053   | chr3R:7750050  | 66     | Within 100bp | Yes | Yes |
| 1623390_at   | FBtr0081943 | chr3R:8754108-8755669   | - | chr3R:8766781   | chr3R:8747802  | -11112 | Upstream     | Yes | No  |
| 1629491_at   | FBtr0081942 | chr3R:8771246-8772686   | - | chr3R:8772749   | chr3R:8769334  | -63    | Within 100bp | Yes | Yes |
| 1637076_at   | FBtr0300335 | chr3R:9294932-9328505   | - | chr3R:9321760   | chr3R:9324722  | 6745   | Downstream   | Yes | No  |
| 1623732_at   | FBtr0273369 | chr3R:10053397-10054283 | + | chr3R:10053751  | chr3R:10048805 | 354    | Downstream   | Yes | Yes |
| 1633050_at   | FBtr0082202 | chr3R:10055490-10056079 | - | chr3R:10057602  | chr3R:10407289 | -1523  | Upstream     | Yes | Yes |
| 1638253_at   | FBtr0309853 | chr3R:10074013-10075366 | - | chr3R:10074665  | chr3R:11225477 | 701    | Downstream   | No  | No  |
| 1627350_at   | FBtr0082222 | chr3R:10222757-10223673 | + | chr3R:10222446  | chr3R:11230566 | -311   | Upstream     | No  | Yes |
| 1641242_at   | FBtr0082378 | chr3R:11151968-11153796 | - | chr3R:11153852  | chr3R:11409876 | -56    | Within 100bp | Yes | Yes |
| 1628449_at   | FBtr0082337 | chr3R:11154654-11156513 | + | chr3R:11152882  | chr3R:11235003 | -1772  | Upstream     | Yes | Yes |
| 1634029_at   | FBtr0082373 | chr3R:11173574-11175395 | - | chr3R:11179200  | chr3R:11422053 | -3805  | Upstream     | Yes | No  |
| 1630418_s_at | FBtr0082399 | chr3R:11437546-11451150 | - | chr3R:11445625  | chr3R:11435717 | 5525   | Downstream   | Yes | No  |
| 1638057_at   | FBtr0113346 | chr3R:11690444-11691799 | - | chr3R:11691920  | chr3R:11567033 | -121   | Upstream     | No  | Yes |
| 1627288_a_at | FBtr0082548 | chr3R:12162888-12166186 | - | chr3R:12165672  | chr3R:11619879 | 514    | Downstream   | Yes | No  |
| 1628094_at   | FBtr0082576 | chr3R:12383360-12385626 | + | chr3R:12383180  | chr3R:11678067 | -180   | Upstream     | No  | Yes |
| 1633994_at   | FBtr0112656 | chr3R:12401794-12402880 | + | chr3R:12400109  | chr3R:12406516 | -1685  | Upstream     | Yes | No  |
| 1636627_at   | FBtr0301944 | chr3R:12512812-12515612 | - | chr3R:12517173  | chr3R:12439144 | -1561  | Upstream     | Yes | Yes |
| 1631781_at   | FBtr0082644 | chr3R:12633358-12634652 | + | chr3R:12633656  | chr3R:12691448 | 298    | Downstream   | Yes | Yes |
| 1638261_at   | FBtr0082738 | chr3R:13290715-13291846 | + | chr3R:13290857  | chr3R:13388724 | 142    | Downstream   | Yes | Yes |
| 1633720_s_at | FBtr0082773 | chr3R:13329069-13334163 | - | chr3R:13333031  | chr3R:13434947 | 1132   | Downstream   | No  | Yes |
| 1641712_at   | FBtr0082745 | chr3R:13340169-13344786 | + | chr3R:13342162  | chr3R:13425960 | 1993   | Downstream   | Yes | Yes |
| 1629639_at   | FBtr0082789 | chr3R:13592275-13592614 | - | chr3R:13594151  | chr3R:13646934 | -1537  | Upstream     | Yes | Yes |
| 1625743_at   | FBtr0082820 | chr3R:13700585-13703122 | + | chr3R:13700443  | chr3R:13683945 | -142   | Upstream     | No  | Yes |
| 1636603_a_at | FBtr0082827 | chr3R:13771597-13779315 | + | chr3R:13776814  | chr3R:13780955 | 5217   | Downstream   | Yes | No  |
| 1628289_at   | FBtr0082863 | chr3R:13901858-13904620 | + | chr3R:13901773  | chr3R:13943449 | -85    | Within 100bp | No  | Yes |
| 1635898_at   | FBtr0082992 | chr3R:14798989-14801165 | + | chr3R:14796281  | chr3R:14898355 | -2708  | Upstream     | Yes | Yes |
| 1631846_at   | FBtr0082993 | chr3R:14801804-14803986 | + | chr3R:14801550  | chr3R:14901601 | -254   | Upstream     | Yes | Yes |
| 1641527_at   | FBtr0083180 | chr3R:15825748-15830322 | + | chr3R:15829051  | chr3R:15180298 | 3303   | Downstream   | No  | No  |
| 1631882_at   | FBtr0083222 | chr3R:16043616-16044717 | + | chr3R:16042792  | chr3R:16049656 | -824   | Upstream     | Yes | Yes |
| 1628585_at   | FBtr0110963 | chr3R:16473369-16475373 | + | chr3R:16473894  | chr3R:16647583 | 525    | Downstream   | Yes | No  |
| 1629863_at   | FBtr0301702 | chr3R:16484698-16495419 | - | chr3R:164042792 | chr3R:16469671 | 452627 | Downstream   | Yes | Yes |
| 1624507_at   | FBtr0083390 | chr3R:17031816-17033247 | + | chr3R:17032142  | chr3R:17040166 | 326    | Downstream   | Yes | Yes |
| 1637707_at   | FBtr0305130 | chr3R:17033960-17036018 | - | chr3R:17036253  | chr3R:17040633 | -235   | Upstream     | No  | Yes |
| 1625431_at   | FBtr0083564 | chr3R:18236193-18239604 | + | chr3R:18238091  | chr3R:18226385 | 1898   | Downstream   | No  | Yes |
| 1630831_at   | FBtr0083694 | chr3R:18616753-18617483 | - | chr3R:18617590  | chr3R:18641460 | -107   | Upstream     | Yes | Yes |
| 1624129_s_at | FBtr0083668 | chr3R:18680605-18685307 | + | chr3R:18680974  | chr3R:18677786 | 369    | Downstream   | No  | Yes |
| 1638335_at   | FBtr0083756 | chr3R:19390271-19392132 | + | chr3R:19390923  | chr3R:19403157 | 652    | Downstream   | Yes | Yes |
| 1626243_at   | FBtr0113247 | chr3R:19409322-19410738 | + | chr3R:19409478  | chr3R:19600613 | 156    | Downstream   | No  | Yes |
| 1625463_at   | FBtr0083784 | chr3R:19659747-19663679 | + | chr3R:19662398  | chr3R:19644978 | 2651   | Downstream   | No  | Yes |
| 1641225_at   | FBtr0301213 | chr3R:19667739-19670647 | + | chr3R:19664365  | chr3R:19847297 | -3374  | Upstream     | Yes | Yes |
| 1641734_at   | FBtr0083857 | chr3R:19886245-19888206 | - | chr3R:19887219  | chr3R:19879700 | 987    | Downstream   | No  | Yes |
| 1638038_at   | FBtr0083894 | chr3R:20406669-20407823 | - | chr3R:20407860  | chr3R:20501982 | -37    | Within 100bp | Yes | Yes |
| 1622974_at   | FBtr0083935 | chr3R:20676221-20677352 | - | chr3R:20677353  | chr3R:20735617 | -1     | Within 100bp | No  | Yes |
| 1635505_a_at | FBtr0336970 | chr3R:20851707-20854680 | - | chr3R:20853945  | chr3R:20832770 | 735    | Downstream   | Yes | No  |
| 1628850_at   | FBtr0084037 | chr3R:21076913-21080530 | - | chr3R:21080462  | chr3R:21084482 | 68     | Within 100bp | Yes | Yes |
| 1627368_at   | FBtr0084113 | chr3R:21665577-21666526 | + | chr3R:21665393  | chr3R:21822679 | -184   | Upstream     | No  | Yes |
| 1632461_at   | FBtr0084127 | chr3R:21749852-21753237 | + | chr3R:21751723  | chr3R:22362358 | 1871   | Downstream   | Yes | No  |
| 1624479_at   | FBtr0084132 | chr3R:21776137-21777213 | + | chr3R:21775884  | chr3R:22375896 | -253   | Upstream     | Yes | No  |
| 1633952_at   | FBtr0084203 | chr3R:22329316-22330552 | + | chr3R:22329273  | chr3R:22381326 | -43    | Within 100bp | No  | Yes |
| 1640956_at   | FBtr0084319 | chr3R:22758845-22761071 | - | chr3R:22761293  | chr3R:22483967 | -222   | Upstream     | No  | Yes |
| 1630915_at   | FBtr0304881 | chr3R:22768241-22768713 | - | chr3R:22768621  | chr3R:22941452 | 92     | Within 100bp | No  | Yes |
| 1630504_at   | FBtr0337028 | chr3R:23072621-23112715 | - | chr3R:23076335  | chr3R:22530562 | 36380  | Downstream   | Yes | No  |
| 1630012_at   | FBtr0290293 | chr3R:23481966-23483541 | + | chr3R:23482746  | chr3R:22583236 | 780    | Downstream   | No  | Yes |
| 1641637_at   | FBtr0273205 | chr3R:23487734-23489180 | + | chr3R:23487469  | chr3R:23677326 | -265   | Upstream     | No  | Yes |

|              |             |                         |   |                |                 |         |              |     |     |
|--------------|-------------|-------------------------|---|----------------|-----------------|---------|--------------|-----|-----|
| 1626764_at   | FBtr0084486 | chr3R:23587206-23589815 | - | chr3R:23589403 | chr3R:23678880  | 412     | Downstream   | No  | No  |
| 1623829_at   | FBtr0113405 | chr3R:23704621-23705517 | + | chr3R:23704772 | chr3R:23760573  | 151     | Downstream   | No  | Yes |
| 1627734_at   | FBtr0084472 | chr3R:23712811-23718357 | - | chr3R:23717660 | chr3R:23763238  | 697     | Downstream   | No  | Yes |
| 1629551_s_at | FBtr0084513 | chr3R:23943627-23948419 | - | chr3R:23945500 | chr3R:23943118  | 2919    | Downstream   | Yes | Yes |
| 1624671_at   | FBtr0084624 | chr3R:24370768-24372736 | - | chr3R:24372918 | chr3R:24318379  | -182    | Upstream     | No  | Yes |
| 1629761_at   | FBtr0084623 | chr3R:24373490-24374910 | - | chr3R:24374922 | chr3R:24582885  | -12     | Within 100bp | No  | Yes |
| 1627345_at   | FBtr0113461 | chr3R:24376946-24377705 | + | chr3R:24373957 | chr3R:24527999  | -2989   | Upstream     | Yes | Yes |
| 1641585_at   | FBtr0334918 | chr3R:24389751-24390335 | - | chr3R:24390998 | chr3R:24719349  | -663    | Upstream     | No  | Yes |
| 1640771_a_at | FBtr0084686 | chr3R:24712783-24717553 | + | chr3R:24714780 | chr3R:24787431  | 1997    | Downstream   | Yes | Yes |
| 1624434_at   | FBtr0084691 | chr3R:24749733-24753512 | + | chr3R:24750522 | chr3R:24814037  | 789     | Downstream   | Yes | No  |
| 1632752_at   | FBtr0084744 | chr3R:24760529-24765058 | - | chr3R:24762835 | chr3R:24829942  | 2223    | Downstream   | Yes | No  |
| 1633189_at   | FBtr0084751 | chr3R:24947631-24949539 | + | chr3R:24948188 | chr3R:24850623  | 557     | Downstream   | Yes | Yes |
| 1635636_at   | FBtr0084810 | chr3R:25240179-25241453 | + | chr3R:25239426 | chr3R:24851559  | -753    | Upstream     | Yes | Yes |
| 1634591_at   | FBtr0084821 | chr3R:25273847-25275166 | + | chr3R:25273474 | chr3R:24876619  | -373    | Upstream     | No  | No  |
| 1629996_at   | FBtr0084846 | chr3R:25381062-25382800 | - | chr3R:25382725 | chr3R:25344831  | 75      | Within 100bp | No  | No  |
| 1634240_at   | FBtr0084879 | chr3R:25505212-25505918 | + | chr3R:25505488 | chr3R:25506233  | -624    | Upstream     | No  | No  |
| 1641176_at   | FBtr0084899 | chr3R:25665808-25677216 | + | chr3R:25674739 | chr3R:25661259  | 8931    | Downstream   | No  | No  |
| 1629601_at   | FBtr0084956 | chr3R:26010962-26011379 | + | chr3R:26010716 | chr3R:25982953  | -246    | Upstream     | No  | No  |
| 1636493_at   | FBtr0085009 | chr3R:26441326-26448994 | + | chr3R:26438609 | chr3R:26725225  | -2717   | Upstream     | Yes | Yes |
| 1630473_at   | FBtr0085029 | chr3R:26619122-26620231 | + | chr3R:26618824 | chr3R:26863133  | -298    | Upstream     | No  | Yes |
| 1629531_at   | FBtr0114538 | chr3R:26629997-26630572 | + | chr3R:26630233 | chr3R:26912888  | 236     | Downstream   | Yes | Yes |
| 1629011_at   | FBtr0085031 | chr3R:26631872-26632958 | + | chr3R:26631645 | chr3R:26964798  | -227    | Upstream     | No  | Yes |
| 1632215_at   | FBtr0085078 | chr3R:27003235-27005469 | - | chr3R:27004950 | chr3R:270070048 | 519     | Downstream   | Yes | Yes |
| 1623027_s_at | FBtr0085150 | chr3R:27022068-27023212 | - | chr3R:27023245 | chr3R:27112247  | -33     | Within 100bp | No  | Yes |
| 1630171_at   | FBtr0085136 | chr3R:27083131-27086619 | - | chr3R:27084478 | chr3R:27124679  | 2141    | Downstream   | Yes | Yes |
| 1629727_at   | FBtr0085103 | chr3R:27093178-27094136 | + | chr3R:27093116 | chr3R:27151087  | -62     | Within 100bp | No  | Yes |
| 1640983_at   | FBtr0085114 | chr3R:27161151-27162920 | + | chr3R:27161293 | chr3R:27157948  | 142     | Downstream   | No  | No  |
| 1633947_at   | FBtr0085183 | chr3R:27478676-27480468 | + | chr3R:27479236 | chr3R:27464163  | 560     | Downstream   | Yes | Yes |
| 1641248_at   | FBtr0085289 | chr3R:28418203-28473209 | + | chr3R:28472142 | chr3R:28340345  | 53939   | Downstream   | Yes | Yes |
| 1630305_at   | FBtr0085321 | chr3R:28581815-28585083 | - | chr3R:28585841 | chr3R:28599265  | -758    | Upstream     | No  | No  |
| 1637894_at   | FBtr0113303 | chr3R:29173268-29194994 | - | chr3R:29181476 | chr3R:29148265  | 13518   | Downstream   | Yes | Yes |
| 1641001_at   | FBtr0085466 | chr3R:29666813-29668877 | - | chr3R:29668299 | chr3R:29619087  | 578     | Downstream   | No  | Yes |
| 1622920_at   | FBtr0085513 | chr3R:29914519-29920289 | - | chr3R:29920048 | chr3R:29935895  | 241     | Downstream   | No  | No  |
| 1624092_at   | FBtr0085511 | chr3R:29925224-29926185 | - | chr3R:29925807 | chr3R:29993392  | 378     | Downstream   | Yes | Yes |
| 1636979_at   | FBtr0085605 | chr3R:30006035-30008232 | - | chr3R:30007821 | chr3R:29995334  | 411     | Downstream   | No  | Yes |
| 1623721_at   | FBtr0309181 | chr3R:30227709-30237720 | - | chr3R:30230076 | chr3R:30202989  | 7644    | Downstream   | Yes | Yes |
| 1631977_at   | FBtr0085686 | chr3R:30503718-30505649 | - | chr3R:30507795 | chr3R:30649113  | -2146   | Upstream     | Yes | Yes |
| 1629729_at   | FBtr0085665 | chr3R:30597003-30599296 | + | chr3R:30597244 | chr3R:30706138  | 241     | Downstream   | No  | Yes |
| 1629926_at   | FBtr0085698 | chr3R:30690643-30692768 | + | chr3R:30691396 | chr3R:31123476  | 753     | Downstream   | No  | No  |
| 1632566_at   | FBtr0085739 | chr3R:31106365-31109188 | - | chr3R:31109183 | chr3R:31130677  | 5       | Within 100bp | Yes | Yes |
| 1639776_s_at | FBtr0300875 | chr3R:31543031-31566167 | + | chr3R:31557675 | chr3R:31213432  | 14644   | Downstream   | No  | No  |
| 1641587_at   | FBtr0070254 | chrX:1469817-1470560    | + | chrX:753724    | chrX:765121     | -716093 | Upstream     | No  | Yes |
| 1640027_a_at | FBtr0307180 | chrX:3569974-3571800    | + | chrX:3571048   | chrX:3719594    | 1074    | Downstream   | No  | Yes |
| 1622987_at   | FBtr0071088 | chrX:7884659-7886976    | + | chrX:7884703   | chrX:7901329    | 44      | Within 100bp | No  | Yes |
| 1628078_at   | FBtr0301736 | chrX:8084082-8085516    | - | chrX:8085117   | chrX:8102100    | 399     | Downstream   | No  | No  |
| 1626103_at   | FBtr0071204 | chrX:8481913-8483060    | + | chrX:8481771   | chrX:8560188    | -142    | Upstream     | No  | Yes |
| 1641605_at   | FBtr0071235 | chrX:8525516-8529525    | - | chrX:8529498   | chrX:9078479    | 27      | Within 100bp | No  | Yes |
| 1638490_at   | FBtr0071357 | chrX:9055046-9058066    | - | chrX:9056404   | chrX:9082944    | 1662    | Downstream   | No  | No  |
| 1630468_at   | FBtr0071397 | chrX:9874673-9875813    | - | chrX:9875885   | chrX:9881939    | -72     | Within 100bp | No  | Yes |
| 1632685_at   | FBtr0073894 | chrX:14184540-14185736  | + | chrX:14184569  | chrX:14226245   | 29      | Within 100bp | No  | Yes |
| 1636328_at   | FBtr0290087 | chrX:16265379-16266464  | - | chrX:16265469  | chrX:16276252   | 2081895 | Downstream   | No  | Yes |
| 1630727_at   | FBtr0074389 | chrX:17203113-17203824  | + | chrX:17452542  | chrX:17247000   | 249429  | Downstream   | No  | Yes |

Additional Data table S7 (separate excel file) List of genomic coordinates for Aly binding sites (peaks) based on different categories specified in Fig. 6B and fig. S14 (Case #1 and Case #2)  
 (Questions: Jongmin Kim / devtxn@gmail.com)

- 1 chr
- 2 start
- 3 end
- 4 Peak\_identifier
- 5 q-value\_for\_peak
- 6 peak\_summit\_coordinates

\* Case1: 248 Aly peaks in WT that overlap with Kmg peaks in WT

| 1   | 2        | 3        | 4         | 5           | 6           |
|-----|----------|----------|-----------|-------------|-------------|
| chr | start    | end      | Peak_iden | q-value_for | peak_summit |
| Y   | 3264980  | 3265590  | ../05_Mac | 119.1378    | 3265279     |
| 2L  | 2609622  | 2610325  | ../05_Mac | 115.1746    | 2610035     |
| 3R  | 11553712 | 11554335 | ../05_Mac | 114.7329    | 11554032    |
| 3R  | 28292336 | 28292985 | ../05_Mac | 112.9494    | 28292742    |
| 2L  | 6686444  | 6687079  | ../05_Mac | 108.2891    | 6686797     |
| 2L  | 2771628  | 2772148  | ../05_Mac | 108.0936    | 2771919     |
| 2L  | 5923264  | 5923940  | ../05_Mac | 107.4054    | 5923740     |
| 3L  | 22328256 | 22329990 | ../05_Mac | 107.1429    | 22329747    |
| 3R  | 28291021 | 28291721 | ../05_Mac | 100.2809    | 28291280    |
| 3R  | 10224454 | 10225162 | ../05_Mac | 98.94647    | 10224754    |
| 3L  | 10048059 | 10048548 | ../05_Mac | 93.07516    | 10048287    |
| 3R  | 26452380 | 26453305 | ../05_Mac | 91.51922    | 26452709    |
| 2L  | 4249499  | 4249979  | ../05_Mac | 90.75327    | 4249732     |
| 2L  | 14548870 | 14549422 | ../05_Mac | 85.97419    | 14549145    |
| 2R  | 9017571  | 9018068  | ../05_Mac | 84.27824    | 9017822     |
| 2L  | 16006053 | 16006656 | ../05_Mac | 83.21551    | 16006381    |
| 3L  | 7364632  | 7365117  | ../05_Mac | 82.94194    | 7364853     |
| 3R  | 5369980  | 5370573  | ../05_Mac | 82.48587    | 5370300     |
| 2L  | 19370149 | 19370687 | ../05_Mac | 82.15482    | 19370428    |
| 2L  | 17626082 | 17626631 | ../05_Mac | 79.36386    | 17626384    |
| 2L  | 3519490  | 3520417  | ../05_Mac | 78.78293    | 3519723     |
| 2R  | 8369490  | 8370275  | ../05_Mac | 78.64422    | 8369863     |
| 2L  | 6802572  | 6803144  | ../05_Mac | 77.94867    | 6802889     |
| 2R  | 8367346  | 8368266  | ../05_Mac | 77.94867    | 8368063     |
| 2R  | 24475134 | 24475659 | ../05_Mac | 77.25293    | 24475406    |
| 3L  | 843788   | 844436   | ../05_Mac | 76.12984    | 844204      |
| 2L  | 10056689 | 10057817 | ../05_Mac | 73.51465    | 10056971    |
| 2R  | 8262882  | 8263517  | ../05_Mac | 72.44023    | 8263300     |
| 3R  | 14641952 | 14642832 | ../05_Mac | 71.24778    | 14642597    |
| 3R  | 30989827 | 30990293 | ../05_Mac | 69.78119    | 30990031    |
| 3R  | 22774562 | 22775017 | ../05_Mac | 69.73753    | 22774814    |
| 2L  | 1344234  | 1344630  | ../05_Mac | 69.06699    | 1344432     |
| 3L  | 2502431  | 2503101  | ../05_Mac | 68.28205    | 2502890     |
| 2R  | 14413468 | 14413889 | ../05_Mac | 68.08724    | 14413678    |
| 3L  | 1253558  | 1254167  | ../05_Mac | 67.83652    | 1253809     |
| 3L  | 21728625 | 21729092 | ../05_Mac | 66.98348    | 21728852    |

\* 1655 aly peaks in WT that do not overlap with Kmg peaks in WT

| 1   | 2        | 3        | 4         | 5           | 6           |
|-----|----------|----------|-----------|-------------|-------------|
| chr | start    | end      | Peak_iden | q-value_for | peak_summit |
| 3R  | 18350942 | 18351543 | ../05_Mac | 119.8077    | 18351214    |
| 3R  | 11276910 | 11277533 | ../05_Mac | 119.7043    | 11277237    |
| 3R  | 5885885  | 5886486  | ../05_Mac | 113.6884    | 5886176     |
| 3R  | 4530907  | 4531599  | ../05_Mac | 112.0373    | 4531067     |
| 2L  | 17905601 | 17906120 | ../05_Mac | 108.4409    | 17905830    |
| 3R  | 27330321 | 27331205 | ../05_Mac | 108.4409    | 27330899    |
| 2R  | 5745807  | 5746353  | ../05_Mac | 107.6911    | 5746075     |
| 3R  | 18897820 | 18898338 | ../05_Mac | 107.6911    | 18898093    |
| 2R  | 16236514 | 16236997 | ../05_Mac | 105.5593    | 16236753    |
| 3R  | 18112396 | 18113124 | ../05_Mac | 105.4733    | 18112639    |
| 2R  | 23183565 | 23184580 | ../05_Mac | 105.0138    | 23183889    |
| 2R  | 14408019 | 14408652 | ../05_Mac | 104.9349    | 14408317    |
| 3R  | 10175960 | 10176482 | ../05_Mac | 104.6619    | 10176208    |
| 2R  | 1750304  | 1750717  | ../05_Mac | 103.246     | 1750512     |
| 3L  | 15182670 | 15183130 | ../05_Mac | 102.5121    | 15182874    |
| 2L  | 11495444 | 11495880 | ../05_Mac | 101.8039    | 11495649    |
| 2R  | 17912074 | 17912756 | ../05_Mac | 99.79368    | 17912412    |
| 3L  | 19328526 | 19328983 | ../05_Mac | 97.83887    | 19328745    |
| 3R  | 22508904 | 22509351 | ../05_Mac | 97.56899    | 22509136    |
| 2R  | 12253689 | 12254200 | ../05_Mac | 97.01659    | 12253920    |
| 3L  | 5915828  | 5916421  | ../05_Mac | 95.38732    | 5916132     |
| 2R  | 14700098 | 14700505 | ../05_Mac | 92.51885    | 14700307    |
| 2L  | 17085922 | 17086429 | ../05_Mac | 92.19827    | 17086186    |
| 3R  | 14349952 | 14350652 | ../05_Mac | 90.80159    | 14350236    |
| 3L  | 26755087 | 26755852 | ../05_Mac | 90.75327    | 26755460    |
| 3R  | 18115026 | 18115554 | ../05_Mac | 88.72097    | 18115255    |
| 2L  | 11586584 | 11587183 | ../05_Mac | 88.25671    | 11586870    |
| 3R  | 18556982 | 18557572 | ../05_Mac | 87.92178    | 18557272    |
| 2L  | 5491412  | 5491963  | ../05_Mac | 86.21043    | 5491714     |
| 3R  | 17846455 | 17847002 | ../05_Mac | 85.70705    | 17846753    |
| 3R  | 31699056 | 31699534 | ../05_Mac | 84.99075    | 31699285    |
| 2L  | 6308549  | 6309107  | ../05_Mac | 84.83384    | 6308797     |
| 2L  | 7710050  | 7711058  | ../05_Mac | 82.49232    | 7710333     |
| 2L  | 5397309  | 5398046  | ../05_Mac | 81.78165    | 5397723     |
| 3L  | 21872627 | 21873497 | ../05_Mac | 81.77728    | 21873209    |
| 3L  | 15475041 | 15475691 | ../05_Mac | 81.70948    | 15475379    |

\* Case2: 4219 new Aly peaks in kmg KD

| 1   | 2        | 3        | 4         | 5           | 6        |
|-----|----------|----------|-----------|-------------|----------|
| chr | start    | end      | Peak_iden | q-value_for | summit   |
| 2R  | 20102705 | 20103253 | ../05_Mac | 98.51183    | 20102973 |
| 3R  | 10927569 | 10928142 | ../05_Mac | 93.13692    | 10927827 |
| 2L  | 3938582  | 3939293  | ../05_Mac | 92.83832    | 3938803  |
| 3R  | 15562724 | 15563253 | ../05_Mac | 86.58209    | 15562956 |
| 3R  | 28850456 | 28851193 | ../05_Mac | 84.05924    | 28850999 |
| 2L  | 6278488  | 6278990  | ../05_Mac | 82.83771    | 6278734  |
| 2L  | 19305797 | 19306351 | ../05_Mac | 81.78394    | 19306064 |
| 3R  | 31176386 | 31177061 | ../05_Mac | 81.70715    | 31176689 |
| 3R  | 31831754 | 31832288 | ../05_Mac | 81.02097    | 31831960 |
| 2L  | 18547823 | 18548436 | ../05_Mac | 80.68266    | 18548127 |
| 3R  | 11719069 | 11719681 | ../05_Mac | 80.45921    | 11719326 |
| 2R  | 20711707 | 20712464 | ../05_Mac | 79.86792    | 20711938 |
| 3L  | 18597838 | 18598453 | ../05_Mac | 78.71223    | 18598020 |
| 2R  | 17994628 | 17995181 | ../05_Mac | 78.13383    | 17994914 |
| 3L  | 23352825 | 23354114 | ../05_Mac | 77.71645    | 23353136 |
| 2L  | 9279573  | 9280092  | ../05_Mac | 77.53938    | 9279867  |
| 3R  | 21396437 | 21396879 | ../05_Mac | 77.39561    | 21396663 |
| 2L  | 6176550  | 6177221  | ../05_Mac | 76.80065    | 6176928  |
| 3L  | 1826284  | 1826999  | ../05_Mac | 76.68582    | 1826765  |
| 2R  | 20766260 | 20767057 | ../05_Mac | 76.51507    | 20766794 |
| 3R  | 13106665 | 13107136 | ../05_Mac | 75.05458    | 13106910 |
| 2L  | 1045578  | 1046228  | ../05_Mac | 74.15377    | 1045942  |
| 2L  | 17785831 | 17786876 | ../05_Mac | 73.87795    | 17786427 |
| 3R  | 30836456 | 30837018 | ../05_Mac | 73.69642    | 30836795 |
| 2R  | 13756509 | 13757082 | ../05_Mac | 73.0602     | 13756794 |
| 2L  | 1387048  | 1387515  | ../05_Mac | 72.71822    | 1387237  |
| 3R  | 28278585 | 28279098 | ../05_Mac | 72.21231    | 28278856 |
| 3R  | 31567011 | 31567472 | ../05_Mac | 71.93346    | 31567245 |
| 3R  | 28029805 | 28030350 | ../05_Mac | 71.62776    | 28030074 |
| 3L  | 17222657 | 17223042 | ../05_Mac | 71.04465    | 17222833 |
| 3R  | 20663902 | 20665023 | ../05_Mac | 70.66276    | 20664313 |
| 3R  | 6574094  | 6574824  | ../05_Mac | 70.46365    | 6574546  |
| 3R  | 6247389  | 6247952  | ../05_Mac | 70.00258    | 6247666  |
| 3L  | 19138387 | 19139110 | ../05_Mac | 69.74174    | 19138818 |
| 3L  | 22667627 | 22668182 | ../05_Mac | 69.7134     | 22667903 |
| 2R  | 8470189  | 8470752  | ../05_Mac | 69.33248    | 8470553  |











|    |          |          |           |          |          |
|----|----------|----------|-----------|----------|----------|
| 3R | 10761670 | 10762163 | ../05_Mac | 17.26735 | 10761853 |
| 3R | 24279357 | 24279707 | ../05_Mac | 16.92204 | 24279535 |
| 3R | 5223079  | 5223547  | ../05_Mac | 16.66974 | 5223282  |
| 3L | 540695   | 541187   | ../05_Mac | 16.29795 | 541037   |
| 2R | 7781955  | 7782291  | ../05_Mac | 16.11589 | 7782120  |
| 3L | 11123237 | 11123540 | ../05_Mac | 16.06254 | 11123380 |
| 2L | 14337988 | 14338560 | ../05_Mac | 14.99969 | 14338268 |
| 3R | 21218956 | 21219343 | ../05_Mac | 14.57804 | 21219141 |
| 3R | 30039602 | 30039925 | ../05_Mac | 14.41316 | 30039744 |
| 3R | 4220727  | 4221035  | ../05_Mac | 12.83661 | 4220890  |
| 2L | 13211147 | 13211481 | ../05_Mac | 12.61578 | 13211341 |
| 3R | 8820739  | 8821130  | ../05_Mac | 11.78813 | 8820860  |
| 3R | 30022576 | 30022891 | ../05_Mac | 11.53563 | 30022727 |
| 3R | 30424968 | 30425254 | ../05_Mac | 11.26481 | 30425096 |
| 3R | 17683174 | 17683552 | ../05_Mac | 10.80612 | 17683321 |
| 2L | 850213   | 850761   | ../05_Mac | 10.16837 | 850511   |

|    |          |          |           |          |          |
|----|----------|----------|-----------|----------|----------|
| 2L | 2239069  | 2239585  | ../05_Mac | 51.6875  | 2239328  |
| 3R | 13986490 | 13987147 | ../05_Mac | 51.66411 | 13986679 |
| 2L | 17540717 | 17541338 | ../05_Mac | 51.65485 | 17540942 |
| 3L | 6983898  | 6984886  | ../05_Mac | 51.63008 | 6984631  |
| 3R | 10148353 | 10149481 | ../05_Mac | 51.61872 | 10148654 |
| 2L | 2627798  | 2628279  | ../05_Mac | 51.60682 | 2628037  |
| 3L | 22510041 | 22510457 | ../05_Mac | 51.58593 | 22510226 |
| 2L | 6605904  | 6606355  | ../05_Mac | 51.48075 | 6606174  |
| 3R | 13080793 | 13081512 | ../05_Mac | 51.05012 | 13081176 |
| 3R | 28361873 | 28362441 | ../05_Mac | 51.05012 | 28362083 |
| 3R | 25340046 | 25340424 | ../05_Mac | 51.04226 | 25340225 |
| 2L | 9371580  | 9372161  | ../05_Mac | 50.98246 | 9371933  |
| 3L | 22627127 | 22628028 | ../05_Mac | 50.94432 | 22627837 |
| 2L | 2507378  | 2507865  | ../05_Mac | 50.93327 | 2507644  |
| 2L | 8864376  | 8864939  | ../05_Mac | 50.85351 | 8864625  |
| 3R | 10261914 | 10262330 | ../05_Mac | 50.72787 | 10262143 |
| 3R | 5782903  | 5783332  | ../05_Mac | 50.65041 | 5783096  |
| 3L | 17436254 | 17436681 | ../05_Mac | 50.63529 | 17436470 |
| 2L | 19146514 | 19147306 | ../05_Mac | 50.6035  | 19146902 |
| 3L | 12661481 | 12661957 | ../05_Mac | 50.59597 | 12661678 |
| 3L | 18326587 | 18326974 | ../05_Mac | 50.59597 | 18326753 |
| 3R | 11720243 | 11720719 | ../05_Mac | 50.59597 | 11720508 |
| 2R | 23476440 | 23476869 | ../05_Mac | 50.4631  | 23476636 |
| 2L | 21238690 | 21239099 | ../05_Mac | 50.45951 | 21238916 |
| 3L | 17338967 | 17339489 | ../05_Mac | 50.42625 | 17339260 |
| 2R | 23790966 | 23791501 | ../05_Mac | 50.35078 | 23791241 |
| 2R | 9386566  | 9387040  | ../05_Mac | 50.32623 | 9386785  |
| 2L | 20906455 | 20907019 | ../05_Mac | 50.27985 | 20906770 |
| 2L | 540501   | 541270   | ../05_Mac | 50.0372  | 541020   |
| 2L | 6359815  | 6360776  | ../05_Mac | 49.99343 | 6360058  |
| X  | 8132178  | 8132562  | ../05_Mac | 49.78323 | 8132376  |
| 2R | 21757120 | 21757592 | ../05_Mac | 49.76563 | 21757399 |
| 2R | 10903296 | 10903997 | ../05_Mac | 49.76435 | 10903512 |
| 3L | 12091402 | 12092180 | ../05_Mac | 49.75375 | 12091885 |
| 3L | 22330594 | 22331630 | ../05_Mac | 49.58327 | 22330869 |
| 2R | 11042560 | 11043118 | ../05_Mac | 49.53829 | 11042837 |
| 2L | 13466224 | 13466705 | ../05_Mac | 49.52439 | 13466503 |
| X  | 6283421  | 6283859  | ../05_Mac | 49.41702 | 6283666  |
| 2L | 11536993 | 11537394 | ../05_Mac | 49.39281 | 11537171 |
| 3L | 21871741 | 21872232 | ../05_Mac | 49.39281 | 21872055 |
| 3L | 24361673 | 24362146 | ../05_Mac | 49.39281 | 24361818 |
| 3L | 4694462  | 4695098  | ../05_Mac | 49.29331 | 4694818  |
| 3R | 19273079 | 19273523 | ../05_Mac | 49.18102 | 19273323 |
| 3L | 5270111  | 5270935  | ../05_Mac | 49.17151 | 5270388  |
| 3R | 20139665 | 20140118 | ../05_Mac | 49.07254 | 20139921 |
| 2L | 19977784 | 19978271 | ../05_Mac | 48.97273 | 19977987 |
| 2L | 6268478  | 6268940  | ../05_Mac | 48.79431 | 6268726  |
| 3R | 11343401 | 11343809 | ../05_Mac | 48.79431 | 11343603 |
| 3R | 11358800 | 11359265 | ../05_Mac | 48.79431 | 11359067 |

|    |          |          |           |          |          |
|----|----------|----------|-----------|----------|----------|
| 2R | 5921572  | 5921968  | ../05_Mac | 48.88335 | 5921765  |
| 3L | 19530491 | 19531016 | ../05_Mac | 48.71075 | 19530761 |
| 3R | 7639091  | 7639717  | ../05_Mac | 48.64645 | 7639533  |
| 2R | 16364726 | 16365506 | ../05_Mac | 48.64454 | 16365311 |
| 2R | 22022257 | 22022795 | ../05_Mac | 48.55902 | 22022502 |
| 2R | 22346954 | 22347361 | ../05_Mac | 48.51787 | 22347139 |
| 2L | 15197982 | 15198686 | ../05_Mac | 48.50626 | 15198432 |
| 3L | 6359007  | 6359354  | ../05_Mac | 48.50626 | 6359198  |
| 3R | 10916909 | 10917626 | ../05_Mac | 48.50626 | 10917338 |
| 3R | 24460738 | 24461376 | ../05_Mac | 48.50626 | 24461164 |
| 2R | 11490856 | 11491732 | ../05_Mac | 48.47798 | 11491424 |
| 3R | 28258764 | 28259218 | ../05_Mac | 48.43218 | 28258993 |
| 3L | 10177309 | 10178134 | ../05_Mac | 48.42579 | 10177505 |
| 3R | 6272504  | 6273002  | ../05_Mac | 48.28705 | 6272769  |
| 3R | 27818427 | 27818903 | ../05_Mac | 48.28705 | 27818667 |
| 2L | 21960096 | 21960507 | ../05_Mac | 48.15269 | 21960266 |
| 2L | 15376044 | 15376425 | ../05_Mac | 48.14112 | 15376225 |
| 2R | 18994558 | 18994951 | ../05_Mac | 48.13995 | 18994758 |
| 2R | 21428916 | 21430058 | ../05_Mac | 48.13808 | 21429817 |
| 2L | 18860579 | 18861263 | ../05_Mac | 48.11284 | 18861001 |
| 2L | 2485117  | 2485538  | ../05_Mac | 48.02585 | 2485345  |
| 3R | 17593299 | 17593751 | ../05_Mac | 47.99255 | 17593448 |
| 2L | 12568741 | 12569153 | ../05_Mac | 47.98302 | 12568958 |
| 2R | 12107224 | 12107708 | ../05_Mac | 47.98302 | 12107416 |
| 2L | 3710125  | 3710669  | ../05_Mac | 47.96387 | 3710487  |
| 3R | 10654678 | 10655482 | ../05_Mac | 47.8823  | 10655123 |
| 2L | 3459413  | 3459800  | ../05_Mac | 47.63538 | 3459615  |
| 3R | 11728655 | 11729062 | ../05_Mac | 47.48043 | 11728866 |
| 2R | 15167586 | 15168241 | ../05_Mac | 47.38752 | 15167965 |
| 3R | 28631629 | 28633183 | ../05_Mac | 47.35605 | 28631906 |
| 3R | 10720357 | 10721129 | ../05_Mac | 47.33945 | 10720638 |
| 3L | 20941198 | 20941753 | ../05_Mac | 47.2506  | 20941441 |
| 3L | 3583360  | 3583752  | ../05_Mac | 47.22268 | 3583507  |
| 3R | 14856763 | 14857308 | ../05_Mac | 47.20545 | 14857066 |
| 2R | 20762080 | 20762625 | ../05_Mac | 47.17302 | 20762370 |
| 2R | 16886273 | 16886728 | ../05_Mac | 47.09538 | 16886483 |
| 3R | 22231815 | 22232375 | ../05_Mac | 47.07937 | 22232165 |
| 3R | 13893193 | 13893633 | ../05_Mac | 47.05457 | 13893396 |
| 2R | 24277694 | 24278106 | ../05_Mac | 46.98161 | 24277932 |
| 2L | 20258239 | 20258615 | ../05_Mac | 46.97039 | 20258456 |
| 3R | 2606799  | 2607724  | ../05_Mac | 46.97039 | 2606999  |
| 3R | 5453165  | 5453524  | ../05_Mac | 46.97039 | 5453350  |
| 3R | 16514354 | 16514832 | ../05_Mac | 46.97039 | 16514524 |
| X  | 20139588 | 20140052 | ../05_Mac | 46.97039 | 20139856 |
| 3R | 18557731 | 18558266 | ../05_Mac | 46.89287 | 18558018 |
| 3R | 12633396 | 12633869 | ../05_Mac | 46.78901 | 12633646 |
| 3R | 24491177 | 24491555 | ../05_Mac | 46.76475 | 24491362 |
| 2L | 16673039 | 16673443 | ../05_Mac | 46.72453 | 16673223 |
| 3R | 17865537 | 17865980 | ../05_Mac | 46.67338 | 17865741 |

|          |          |          |           |          |          |
|----------|----------|----------|-----------|----------|----------|
| 3R       | 4964091  | 4964535  | ../05_Mac | 48.71268 | 4964276  |
| 2L       | 19942043 | 19942486 | ../05_Mac | 48.6641  | 19942234 |
| 2L       | 12160546 | 12161051 | ../05_Mac | 48.60431 | 12160830 |
| 2L       | 11310700 | 11311055 | ../05_Mac | 48.59842 | 11310885 |
| 2L       | 1534900  | 1536128  | ../05_Mac | 48.59123 | 1535868  |
| 3R       | 12727572 | 12728131 | ../05_Mac | 48.59123 | 12727775 |
| 3R       | 23521411 | 23521810 | ../05_Mac | 48.50274 | 23521582 |
| 2R       | 16078637 | 16079044 | ../05_Mac | 48.37787 | 16078843 |
| 3L       | 9585768  | 9586177  | ../05_Mac | 48.20192 | 9585949  |
| 2R       | 14399847 | 14400316 | ../05_Mac | 48.19899 | 14400004 |
| 2R       | 20807903 | 20808360 | ../05_Mac | 48.19899 | 20808121 |
| 2R       | 20909491 | 20909968 | ../05_Mac | 48.19899 | 20909667 |
| 3R       | 17483563 | 17483985 | ../05_Mac | 48.19899 | 17483758 |
| 3R       | 23413574 | 23414171 | ../05_Mac | 48.19899 | 23413799 |
| 3R       | 11578540 | 11579016 | ../05_Mac | 48.19783 | 11578802 |
| 2L       | 587847   | 588275   | ../05_Mac | 48.04269 | 588019   |
| 3L       | 9236413  | 9236933  | ../05_Mac | 48.02528 | 9236688  |
| 2R       | 5819055  | 5819504  | ../05_Mac | 48.01215 | 5819248  |
| 3L       | 6200238  | 6200662  | ../05_Mac | 47.63432 | 6200459  |
| 2L       | 4762615  | 4763096  | ../05_Mac | 47.60636 | 4762854  |
| 3R       | 26778854 | 26779156 | ../05_Mac | 47.60636 | 26779007 |
| 3L       | 18461503 | 18463286 | ../05_Mac | 47.5068  | 18462743 |
| 2L       | 9580906  | 9581287  | ../05_Mac | 47.49297 | 9581088  |
| 2R       | 23804225 | 23804958 | ../05_Mac | 47.49297 | 23804720 |
| 3L       | 4508199  | 4508576  | ../05_Mac | 47.46947 | 4508393  |
| 2L       | 2385657  | 2386330  | ../05_Mac | 47.37914 | 2385813  |
| 2L       | 21577558 | 21578020 | ../05_Mac | 47.21963 | 21577752 |
| 3L       | 11871069 | 11871644 | ../05_Mac | 47.01601 | 11871302 |
| 3L       | 17275347 | 17275792 | ../05_Mac | 47.01601 | 17275596 |
| 2R       | 8701633  | 8702034  | ../05_Mac | 46.88433 | 8701835  |
| 2R       | 13077695 | 13078240 | ../05_Mac | 46.88433 | 13077892 |
| 2L       | 1828702  | 1829162  | ../05_Mac | 46.85847 | 1828937  |
| 3R       | 8504854  | 8505503  | ../05_Mac | 46.85847 | 8505321  |
| 2R       | 24239178 | 24239593 | ../05_Mac | 46.42884 | 24239343 |
| 2R       | 6854172  | 6854607  | ../05_Mac | 46.35968 | 6854371  |
| 3R       | 4720826  | 4721400  | ../05_Mac | 46.35544 | 4721124  |
| 2R       | 12297580 | 12298049 | ../05_Mac | 46.3451  | 12297800 |
| 3R       | 19311275 | 19312006 | ../05_Mac | 46.29081 | 19311831 |
| 3L       | 4751225  | 4751598  | ../05_Mac | 46.2828  | 4751427  |
| 2.11E+14 | 10744    | 11152    | ../05_Mac | 46.23242 | 10947    |
| 3L       | 9770271  | 9770949  | ../05_Mac | 46.07524 | 9770446  |
| 3L       | 6454949  | 6455401  | ../05_Mac | 46.05443 | 6455157  |
| 3R       | 14423882 | 14424428 | ../05_Mac | 45.94327 | 14424210 |
| 3R       | 7625902  | 7626718  | ../05_Mac | 45.87371 | 7626219  |
| 2L       | 17548852 | 17549232 | ../05_Mac | 45.84376 | 17549019 |
| 2R       | 24445294 | 24445682 | ../05_Mac | 45.84376 | 24445474 |
| 3L       | 20610321 | 20610748 | ../05_Mac | 45.84376 | 20610508 |
| 3R       | 3263452  | 3263822  | ../05_Mac | 45.84376 | 3263629  |
| 2L       | 22452306 | 22452602 | ../05_Mac | 45.70048 | 22452460 |

|    |          |          |           |          |          |
|----|----------|----------|-----------|----------|----------|
| 3R | 9378187  | 9378605  | ../05_Mac | 46.6325  | 9378357  |
| 2L | 3845577  | 3845905  | ../05_Mac | 46.62829 | 3845749  |
| 2L | 8494488  | 8494920  | ../05_Mac | 46.61055 | 8494754  |
| 3L | 20740525 | 20740964 | ../05_Mac | 46.59114 | 20740747 |
| 3R | 6305545  | 6305914  | ../05_Mac | 46.50259 | 6305717  |
| 3R | 31562541 | 31563086 | ../05_Mac | 46.46188 | 31562865 |
| 3L | 18584581 | 18585201 | ../05_Mac | 46.44664 | 18584821 |
| 3L | 13101318 | 13101783 | ../05_Mac | 46.35941 | 13101531 |
| 3R | 30384011 | 30384917 | ../05_Mac | 46.32786 | 30384295 |
| 2L | 18516298 | 18516811 | ../05_Mac | 46.32494 | 18516571 |
| 3L | 19621548 | 19621934 | ../05_Mac | 46.32438 | 19621757 |
| 3R | 26092827 | 26093327 | ../05_Mac | 46.31619 | 26093095 |
| 2L | 16560993 | 16561370 | ../05_Mac | 46.28131 | 16561195 |
| 3R | 13222074 | 13222509 | ../05_Mac | 46.18966 | 13222257 |
| 2R | 13762410 | 13763127 | ../05_Mac | 46.11183 | 13762671 |
| 2L | 4858260  | 4859376  | ../05_Mac | 46.078   | 4859157  |
| 3L | 18015082 | 18015513 | ../05_Mac | 46.0621  | 18015292 |
| 2R | 17310251 | 17310763 | ../05_Mac | 45.97246 | 17310536 |
| 2R | 12771419 | 12771790 | ../05_Mac | 45.95564 | 12771605 |
| 2L | 20610776 | 20611199 | ../05_Mac | 45.94215 | 20610974 |
| 2L | 1655494  | 1656044  | ../05_Mac | 45.88438 | 1655777  |
| 3R | 28504009 | 28504667 | ../05_Mac | 45.83084 | 28504479 |
| 3R | 13813380 | 13814029 | ../05_Mac | 45.82809 | 13813653 |
| 2R | 20159971 | 20160518 | ../05_Mac | 45.81331 | 20160316 |
| 3R | 10447228 | 10447716 | ../05_Mac | 45.72833 | 10447451 |
| 3L | 19690702 | 19691197 | ../05_Mac | 45.72636 | 19690901 |
| 3R | 12897669 | 12898186 | ../05_Mac | 45.72636 | 12897927 |
| 3L | 20086115 | 20086682 | ../05_Mac | 45.68794 | 20086395 |
| 3L | 22651632 | 22652170 | ../05_Mac | 45.632   | 22651939 |
| 3L | 20090573 | 20091097 | ../05_Mac | 45.58994 | 20090896 |
| 2R | 18558731 | 18559216 | ../05_Mac | 45.55549 | 18558947 |
| 2L | 19392361 | 19392952 | ../05_Mac | 45.54462 | 19392614 |
| 2L | 21398472 | 21398943 | ../05_Mac | 45.47174 | 21398666 |
| 3L | 14820862 | 14821371 | ../05_Mac | 45.4572  | 14821123 |
| 3R | 5996993  | 5997392  | ../05_Mac | 45.45184 | 5997194  |
| X  | 3643902  | 3644302  | ../05_Mac | 45.45184 | 3644080  |
| 3R | 22902179 | 22902633 | ../05_Mac | 45.41866 | 22902408 |
| 3L | 5220669  | 5221315  | ../05_Mac | 45.37924 | 5220852  |
| 2L | 6194861  | 6195372  | ../05_Mac | 45.34084 | 6195092  |
| 2L | 12661286 | 12661669 | ../05_Mac | 45.34084 | 12661475 |
| 2R | 17498124 | 17498634 | ../05_Mac | 45.33725 | 17498348 |
| 3R | 30632582 | 30633370 | ../05_Mac | 45.32819 | 30633078 |
| 2L | 20981948 | 20982423 | ../05_Mac | 45.28376 | 20982171 |
| 3L | 13447235 | 13447728 | ../05_Mac | 45.24627 | 13447392 |
| 3L | 17785388 | 17786136 | ../05_Mac | 45.23314 | 17785848 |
| 3R | 31852077 | 31852701 | ../05_Mac | 45.12887 | 31852302 |
| 3R | 25536520 | 25537323 | ../05_Mac | 45.07924 | 25537076 |
| 3L | 12302303 | 12302849 | ../05_Mac | 45.0341  | 12302614 |
| 3R | 13310293 | 13310684 | ../05_Mac | 45.03143 | 13310484 |

|    |          |          |           |          |          |
|----|----------|----------|-----------|----------|----------|
| 3L | 21256535 | 21257240 | ../05_Mac | 45.44635 | 21257003 |
| 3L | 22606155 | 22606582 | ../05_Mac | 45.28035 | 22606331 |
| 3R | 16036251 | 16036755 | ../05_Mac | 45.26063 | 16036526 |
| 3L | 14038926 | 14039389 | ../05_Mac | 45.24402 | 14039122 |
| 2L | 10932414 | 10932845 | ../05_Mac | 45.22899 | 10932635 |
| 2L | 9284577  | 9284977  | ../05_Mac | 45.14884 | 9284785  |
| 3L | 6927858  | 6928396  | ../05_Mac | 45.14884 | 6928163  |
| 3R | 19864045 | 19864969 | ../05_Mac | 45.13716 | 19864702 |
| 3L | 2656595  | 2657054  | ../05_Mac | 45.12304 | 2656793  |
| 3R | 19839849 | 19841121 | ../05_Mac | 44.88533 | 19840878 |
| Y  | 3257962  | 3258578  | ../05_Mac | 44.85933 | 3258395  |
| 3R | 20738939 | 20739550 | ../05_Mac | 44.73734 | 20739222 |
| 2R | 14631936 | 14632381 | ../05_Mac | 44.6876  | 14632147 |
| 2L | 10093991 | 10094674 | ../05_Mac | 44.68054 | 10094429 |
| 2R | 14998743 | 14999132 | ../05_Mac | 44.68054 | 14998931 |
| 3L | 16515296 | 16515682 | ../05_Mac | 44.68054 | 16515514 |
| 3R | 2211846  | 2212265  | ../05_Mac | 44.68054 | 2212060  |
| 3R | 18902003 | 18902536 | ../05_Mac | 44.68054 | 18902194 |
| 2L | 15357421 | 15358612 | ../05_Mac | 44.59514 | 15357617 |
| 2L | 3739419  | 3739880  | ../05_Mac | 44.55737 | 3739606  |
| 2R | 14661091 | 14662081 | ../05_Mac | 44.55184 | 14661814 |
| 3L | 6530504  | 6530946  | ../05_Mac | 44.54479 | 6530750  |
| 3L | 3688466  | 3689757  | ../05_Mac | 44.51438 | 3689394  |
| 3L | 16594921 | 16595286 | ../05_Mac | 44.50639 | 16595080 |
| 3L | 20927609 | 20928073 | ../05_Mac | 44.42045 | 20927813 |
| 2R | 6840444  | 6840899  | ../05_Mac | 44.3465  | 6840641  |
| 3R | 24870705 | 24871205 | ../05_Mac | 44.29949 | 24871019 |
| 3L | 18377309 | 18377821 | ../05_Mac | 44.2623  | 18377622 |
| 3L | 9598689  | 9599180  | ../05_Mac | 44.25904 | 9598967  |
| 3R | 23639827 | 23640196 | ../05_Mac | 44.20912 | 23640011 |
| 2L | 7013334  | 7013919  | ../05_Mac | 44.10861 | 7013747  |
| 3R | 6554152  | 6554667  | ../05_Mac | 44.10326 | 6554373  |
| 3R | 13869254 | 13869740 | ../05_Mac | 44.10326 | 13869594 |
| 3R | 29341637 | 29342150 | ../05_Mac | 44.10326 | 29341862 |
| 2L | 22108748 | 22109142 | ../05_Mac | 43.98834 | 22108962 |
| 3L | 20632830 | 20633205 | ../05_Mac | 43.97087 | 20633023 |
| 2R | 11704138 | 11704497 | ../05_Mac | 43.87782 | 11704307 |
| 3R | 15675569 | 15676128 | ../05_Mac | 43.84209 | 15675877 |
| 3L | 7220649  | 7221084  | ../05_Mac | 43.63926 | 7220912  |
| 3L | 19486259 | 19487157 | ../05_Mac | 43.6325  | 19486510 |
| 2R | 16102493 | 16102983 | ../05_Mac | 43.53246 | 16102715 |
| X  | 3316218  | 3316568  | ../05_Mac | 43.52786 | 3316384  |
| X  | 16731888 | 16732297 | ../05_Mac | 43.52786 | 16732086 |
| 3L | 4928025  | 4928399  | ../05_Mac | 43.42222 | 4928231  |
| 3R | 8947920  | 8948431  | ../05_Mac | 43.4103  | 8948088  |
| 3L | 557422   | 557860   | ../05_Mac | 43.15096 | 557646   |
| 2L | 2472766  | 2473575  | ../05_Mac | 43.08313 | 2473015  |
| 2L | 2045312  | 2045691  | ../05_Mac | 43.06908 | 2045499  |
| 2R | 14948660 | 14949287 | ../05_Mac | 42.99479 | 14948943 |

|    |          |          |           |          |          |
|----|----------|----------|-----------|----------|----------|
| 2L | 11180449 | 11181069 | ../05_Mac | 44.99567 | 11180728 |
| 3R | 10985875 | 10986304 | ../05_Mac | 44.94907 | 10986085 |
| 3R | 26613670 | 26614077 | ../05_Mac | 44.94907 | 26613898 |
| X  | 17173760 | 17174134 | ../05_Mac | 44.94907 | 17173960 |
| 2L | 1320361  | 1320834  | ../05_Mac | 44.92574 | 1320600  |
| 3L | 2339831  | 2340339  | ../05_Mac | 44.90314 | 2340088  |
| 2R | 10723694 | 10724445 | ../05_Mac | 44.74132 | 10723887 |
| 3R | 5923940  | 5924326  | ../05_Mac | 44.72113 | 5924128  |
| 3L | 2899411  | 2900658  | ../05_Mac | 44.69004 | 2900170  |
| 3L | 18936342 | 18936769 | ../05_Mac | 44.65064 | 18936558 |
| 3R | 7601663  | 7602275  | ../05_Mac | 44.60367 | 7601884  |
| 3L | 9820133  | 9820631  | ../05_Mac | 44.55114 | 9820358  |
| 2L | 1625627  | 1626420  | ../05_Mac | 44.44822 | 1626259  |
| 3R | 13490584 | 13491098 | ../05_Mac | 44.44822 | 13490793 |
| 3R | 9189786  | 9190999  | ../05_Mac | 44.40859 | 9190263  |
| 3R | 21548025 | 21548555 | ../05_Mac | 44.34647 | 21548329 |
| 3R | 21080053 | 21080686 | ../05_Mac | 44.32965 | 21080242 |
| 3L | 17218304 | 17218706 | ../05_Mac | 44.27466 | 17218485 |
| 2L | 6845342  | 6845847  | ../05_Mac | 44.11072 | 6845663  |
| 2L | 14170001 | 14170410 | ../05_Mac | 44.03567 | 14170164 |
| 2L | 8819862  | 8820191  | ../05_Mac | 43.94992 | 8820050  |
| 2L | 18898969 | 18899493 | ../05_Mac | 43.94992 | 18899247 |
| 2R | 19892240 | 19892617 | ../05_Mac | 43.94992 | 19892383 |
| 2R | 13774206 | 13775474 | ../05_Mac | 43.92215 | 13775231 |
| 3L | 11542998 | 11543362 | ../05_Mac | 43.86101 | 11543176 |
| 2R | 15173136 | 15173524 | ../05_Mac | 43.85975 | 15173302 |
| 3L | 4353309  | 4353618  | ../05_Mac | 43.84819 | 4353471  |
| 2R | 9517506  | 9518114  | ../05_Mac | 43.82822 | 9517936  |
| 2R | 8487124  | 8487716  | ../05_Mac | 43.8131  | 8487370  |
| 3R | 9195561  | 9196283  | ../05_Mac | 43.7979  | 9196029  |
| 2R | 10959610 | 10960054 | ../05_Mac | 43.78491 | 10959859 |
| 2R | 11316428 | 11317105 | ../05_Mac | 43.57113 | 11316910 |
| 3L | 22073832 | 22074333 | ../05_Mac | 43.52678 | 22074074 |
| 3R | 6205742  | 6206336  | ../05_Mac | 43.51272 | 6206132  |
| 2R | 20690596 | 20690992 | ../05_Mac | 43.46153 | 20690772 |
| 3L | 23508476 | 23509298 | ../05_Mac | 43.4528  | 23508731 |
| 3R | 22894055 | 22894508 | ../05_Mac | 43.4528  | 22894253 |
| 2R | 21912009 | 21912418 | ../05_Mac | 43.44513 | 21912173 |
| 3R | 25693865 | 25694437 | ../05_Mac | 43.42131 | 25694220 |
| 2L | 14906544 | 14907373 | ../05_Mac | 43.41279 | 14907092 |
| 3R | 22185978 | 22186296 | ../05_Mac | 43.41279 | 22186148 |
| 2L | 17381612 | 17382004 | ../05_Mac | 43.3965  | 17381792 |
| 3R | 26710128 | 26710820 | ../05_Mac | 43.38324 | 26710328 |
| 3R | 27427281 | 27427785 | ../05_Mac | 43.38181 | 27427590 |
| 2L | 2333545  | 2333978  | ../05_Mac | 43.37526 | 2333782  |
| 3R | 31642892 | 31643338 | ../05_Mac | 43.3518  | 31643140 |
| 2R | 18738946 | 18739734 | ../05_Mac | 43.34745 | 18739527 |
| 3L | 13290527 | 13290970 | ../05_Mac | 43.33971 | 13290778 |
| 3R | 10521368 | 10521813 | ../05_Mac | 43.29625 | 10521636 |

|          |          |          |           |          |          |
|----------|----------|----------|-----------|----------|----------|
| 2R       | 9392797  | 9393179  | ../05_Mac | 42.97556 | 9392993  |
| 2R       | 8304830  | 8305258  | ../05_Mac | 42.95503 | 8305075  |
| 2L       | 16642720 | 16643114 | ../05_Mac | 42.92436 | 16642911 |
| X        | 9267529  | 9267925  | ../05_Mac | 42.87117 | 9267742  |
| 2L       | 21090999 | 21091332 | ../05_Mac | 42.86257 | 21091144 |
| 3L       | 5427368  | 5427818  | ../05_Mac | 42.83683 | 5427620  |
| 3R       | 6042735  | 6043178  | ../05_Mac | 42.83683 | 6042963  |
| 3R       | 19424998 | 19425965 | ../05_Mac | 42.78578 | 19425742 |
| 3R       | 4235742  | 4236193  | ../05_Mac | 42.75794 | 4235973  |
| 2L       | 14460536 | 14461218 | ../05_Mac | 42.64819 | 14460793 |
| 3R       | 4551698  | 4552239  | ../05_Mac | 42.58527 | 4551947  |
| 3L       | 22607571 | 22608242 | ../05_Mac | 42.52673 | 22608061 |
| 3R       | 25868140 | 25868611 | ../05_Mac | 42.52673 | 25868401 |
| 3L       | 12413710 | 12414151 | ../05_Mac | 42.49039 | 12413984 |
| 3R       | 6709512  | 6709916  | ../05_Mac | 42.4002  | 6709722  |
| 2R       | 23138350 | 23138825 | ../05_Mac | 42.38398 | 23138578 |
| 3L       | 23814437 | 23814808 | ../05_Mac | 42.38398 | 23814628 |
| 3R       | 11463435 | 11463870 | ../05_Mac | 42.38398 | 11463627 |
| 3R       | 18503818 | 18504260 | ../05_Mac | 42.38398 | 18504082 |
| 2L       | 2079803  | 2080176  | ../05_Mac | 42.31062 | 2079969  |
| 2L       | 20800332 | 20800730 | ../05_Mac | 42.30289 | 20800535 |
| 3R       | 21534253 | 21534655 | ../05_Mac | 42.19324 | 21534431 |
| 3R       | 15953986 | 15954762 | ../05_Mac | 42.15079 | 15954471 |
| 2L       | 3989771  | 3990371  | ../05_Mac | 42.11349 | 3990054  |
| 3R       | 19613149 | 19613594 | ../05_Mac | 42.04321 | 19613359 |
| 3R       | 24201272 | 24201732 | ../05_Mac | 41.9379  | 24201559 |
| 3L       | 10571886 | 10572545 | ../05_Mac | 41.92849 | 10572178 |
| 2R       | 19455674 | 19456112 | ../05_Mac | 41.86369 | 19455853 |
| 3R       | 12036172 | 12036599 | ../05_Mac | 41.81507 | 12036352 |
| 3R       | 29553748 | 29554094 | ../05_Mac | 41.81105 | 29553924 |
| 2R       | 16454396 | 16454766 | ../05_Mac | 41.79013 | 16454579 |
| 2L       | 13540469 | 13540897 | ../05_Mac | 41.76918 | 13540634 |
| 2L       | 18185320 | 18186201 | ../05_Mac | 41.72001 | 18186025 |
| 3L       | 16747352 | 16747801 | ../05_Mac | 41.644   | 16747607 |
| 3R       | 16000427 | 16001277 | ../05_Mac | 41.59795 | 16001129 |
| 3L       | 5918087  | 5918594  | ../05_Mac | 41.59607 | 5918372  |
| 3L       | 21814989 | 21815625 | ../05_Mac | 41.50251 | 21815370 |
| 2L       | 20231747 | 20232292 | ../05_Mac | 41.38636 | 20232039 |
| 3R       | 21373397 | 21374529 | ../05_Mac | 41.38092 | 21373587 |
| 2R       | 9827009  | 9827355  | ../05_Mac | 41.33538 | 9827196  |
| 3L       | 18523330 | 18523825 | ../05_Mac | 41.33028 | 18523576 |
| 2L       | 3994433  | 3994811  | ../05_Mac | 41.24826 | 3994611  |
| 3L       | 21718623 | 21719123 | ../05_Mac | 41.24826 | 21718846 |
| 3R       | 11010056 | 11010483 | ../05_Mac | 41.24826 | 11010290 |
| Y_mapped | 37043    | 37390    | ../05_Mac | 41.24826 | 37209    |
| 2L       | 5480217  | 5480670  | ../05_Mac | 41.2375  | 5480425  |
| X        | 11918529 | 11918905 | ../05_Mac | 41.21606 | 11918716 |
| 3L       | 13245976 | 13246415 | ../05_Mac | 41.13004 | 13246165 |
| 3L       | 13028010 | 13028393 | ../05_Mac | 41.10453 | 13028242 |

|    |          |          |           |          |          |
|----|----------|----------|-----------|----------|----------|
| 2L | 6556025  | 6556476  | ../05_Mac | 43.26159 | 6556292  |
| 3R | 27764630 | 27765213 | ../05_Mac | 43.25404 | 27764947 |
| 2R | 20796240 | 20796681 | ../05_Mac | 43.24304 | 20796435 |
| 3R | 29694578 | 29694962 | ../05_Mac | 43.17352 | 29694774 |
| 2L | 2482059  | 2482493  | ../05_Mac | 43.13536 | 2482301  |
| 2R | 12067024 | 12067477 | ../05_Mac | 43.12817 | 12067195 |
| 3R | 23617933 | 23618244 | ../05_Mac | 43.04987 | 23618066 |
| 3L | 18091469 | 18091976 | ../05_Mac | 43.0149  | 18091722 |
| 2R | 24225022 | 24225551 | ../05_Mac | 42.9583  | 24225203 |
| 3R | 29403915 | 29404678 | ../05_Mac | 42.9583  | 29404215 |
| 3R | 25644513 | 25644953 | ../05_Mac | 42.95797 | 25644725 |
| 3R | 30229881 | 30230492 | ../05_Mac | 42.92658 | 30230163 |
| 3L | 8323935  | 8324569  | ../05_Mac | 42.90348 | 8324388  |
| 3R | 13205861 | 13206290 | ../05_Mac | 42.8782  | 13206047 |
| 3R | 23015704 | 23016094 | ../05_Mac | 42.70632 | 23015910 |
| 3R | 19724729 | 19725286 | ../05_Mac | 42.65818 | 19724920 |
| 3R | 6948872  | 6949490  | ../05_Mac | 42.61566 | 6949316  |
| 3L | 4949544  | 4950312  | ../05_Mac | 42.51698 | 4950111  |
| 3L | 10043309 | 10043801 | ../05_Mac | 42.49581 | 10043538 |
| 3R | 25824495 | 25825117 | ../05_Mac | 42.49581 | 25824722 |
| 3L | 9531204  | 9531856  | ../05_Mac | 42.46591 | 9531572  |
| 3L | 17167900 | 17168294 | ../05_Mac | 42.46591 | 17168077 |
| 3L | 4461399  | 4461845  | ../05_Mac | 42.4508  | 4461609  |
| 3R | 6883889  | 6884387  | ../05_Mac | 42.4508  | 6884175  |
| 3R | 7037300  | 7037734  | ../05_Mac | 42.44304 | 7037516  |
| 3L | 17410174 | 17410531 | ../05_Mac | 42.43951 | 17410349 |
| 2R | 13755360 | 13755736 | ../05_Mac | 42.406   | 13755555 |
| 3R | 16329364 | 16329770 | ../05_Mac | 42.36626 | 16329555 |
| 2L | 13847811 | 13848152 | ../05_Mac | 42.29305 | 13848004 |
| 2R | 22399904 | 22400289 | ../05_Mac | 42.20544 | 22400084 |
| 3R | 7227718  | 7228233  | ../05_Mac | 42.15553 | 7227925  |
| 2L | 16328032 | 16328402 | ../05_Mac | 42.09348 | 16328225 |
| 3L | 5764243  | 5764682  | ../05_Mac | 42.06059 | 5764478  |
| 2L | 12506741 | 12507183 | ../05_Mac | 42.06025 | 12506899 |
| 3R | 8065351  | 8065863  | ../05_Mac | 42.04132 | 8065542  |
| 2R | 19966809 | 19967196 | ../05_Mac | 42.03239 | 19967008 |
| 3L | 10418910 | 10419289 | ../05_Mac | 42.0286  | 10419115 |
| 2L | 15624770 | 15625159 | ../05_Mac | 41.97681 | 15624984 |
| 2L | 15882767 | 15883149 | ../05_Mac | 41.97681 | 15882961 |
| 2R | 19114361 | 19114979 | ../05_Mac | 41.97681 | 19114806 |
| 3L | 5521211  | 5521807  | ../05_Mac | 41.97681 | 5521409  |
| 3R | 28419045 | 28419423 | ../05_Mac | 41.97681 | 28419238 |
| 3R | 28471706 | 28472367 | ../05_Mac | 41.97681 | 28471872 |
| 3R | 23654469 | 23655359 | ../05_Mac | 41.8489  | 23654673 |
| 3R | 17169665 | 17170098 | ../05_Mac | 41.80099 | 17169907 |
| 3R | 29612482 | 29613028 | ../05_Mac | 41.80099 | 29612779 |
| 2R | 8337236  | 8337921  | ../05_Mac | 41.79207 | 8337722  |
| 2L | 19844796 | 19845394 | ../05_Mac | 41.74697 | 19845219 |
| 3R | 29178269 | 29178843 | ../05_Mac | 41.68804 | 29178655 |



|    |          |          |           |          |          |
|----|----------|----------|-----------|----------|----------|
| 3L | 4804734  | 4805124  | ../05_Mac | 41.08796 | 4804909  |
| 3R | 4093126  | 4093638  | ../05_Mac | 40.80625 | 4093395  |
| 2L | 18077210 | 18077684 | ../05_Mac | 40.68374 | 18077508 |
| 2R | 24432514 | 24432923 | ../05_Mac | 40.68374 | 24432739 |
| 3R | 24392415 | 24392868 | ../05_Mac | 40.68374 | 24392630 |
| 3L | 22576399 | 22576844 | ../05_Mac | 40.64237 | 22576618 |
| 2R | 21067979 | 21068449 | ../05_Mac | 40.58725 | 21068194 |
| 3L | 20065751 | 20066118 | ../05_Mac | 40.54168 | 20065923 |
| 3R | 6459828  | 6460433  | ../05_Mac | 40.5245  | 6460093  |
| 4  | 425292   | 426276   | ../05_Mac | 40.4303  | 426042   |
| 2R | 12806438 | 12806803 | ../05_Mac | 40.34236 | 12806619 |
| 2L | 21905819 | 21907219 | ../05_Mac | 40.24661 | 21906996 |
| 2L | 5588241  | 5588623  | ../05_Mac | 40.12216 | 5588429  |
| 2R | 7090013  | 7090350  | ../05_Mac | 40.12216 | 7090186  |
| 3L | 18294073 | 18294783 | ../05_Mac | 40.12216 | 18294587 |
| 2L | 9672243  | 9672991  | ../05_Mac | 39.94168 | 9672804  |
| 3R | 19715746 | 19716133 | ../05_Mac | 39.91883 | 19715941 |
| 3L | 7458857  | 7459349  | ../05_Mac | 39.82336 | 7459042  |
| 3L | 552995   | 553400   | ../05_Mac | 39.73105 | 553217   |
| 3R | 31805246 | 31805675 | ../05_Mac | 39.70958 | 31805490 |
| 3R | 6119524  | 6119912  | ../05_Mac | 39.68351 | 6119712  |
| X  | 2790047  | 2791442  | ../05_Mac | 39.6566  | 2790570  |
| 3L | 1668544  | 1668965  | ../05_Mac | 39.62989 | 1668775  |
| 2L | 15564209 | 15564675 | ../05_Mac | 39.56242 | 15564391 |
| 2L | 22407642 | 22408012 | ../05_Mac | 39.56242 | 22407844 |
| 3L | 7970495  | 7971278  | ../05_Mac | 39.56242 | 7970904  |
| 3L | 11914025 | 11914383 | ../05_Mac | 39.56242 | 11914221 |
| 3L | 22112282 | 22112701 | ../05_Mac | 39.56242 | 22112467 |
| 3R | 2613889  | 2614358  | ../05_Mac | 39.56242 | 2614083  |
| 3R | 11116777 | 11117299 | ../05_Mac | 39.56242 | 11117069 |
| 3R | 28754083 | 28754613 | ../05_Mac | 39.56242 | 28754322 |
| 3R | 19117578 | 19117911 | ../05_Mac | 39.49658 | 19117736 |
| 2L | 14941157 | 14941633 | ../05_Mac | 39.43701 | 14941340 |
| 2L | 11713054 | 11713567 | ../05_Mac | 39.43435 | 11713366 |
| 3R | 15428410 | 15428978 | ../05_Mac | 39.39176 | 15428806 |
| 2R | 25060059 | 25060454 | ../05_Mac | 39.35271 | 25060251 |
| 2L | 7788057  | 7788457  | ../05_Mac | 39.33115 | 7788236  |
| 3L | 10565828 | 10566610 | ../05_Mac | 39.10673 | 10566287 |
| 3R | 24734937 | 24735334 | ../05_Mac | 39.04605 | 24735152 |
| 2L | 14922835 | 14923272 | ../05_Mac | 39.0056  | 14923037 |
| 3R | 27758305 | 27758718 | ../05_Mac | 39.0056  | 27758552 |
| 3R | 24890617 | 24891044 | ../05_Mac | 38.94885 | 24890858 |
| 3L | 8745480  | 8745913  | ../05_Mac | 38.89658 | 8745651  |
| 3L | 22624799 | 22625183 | ../05_Mac | 38.87848 | 22624986 |
| 2R | 24579646 | 24579973 | ../05_Mac | 38.76942 | 24579826 |
| 3L | 9130206  | 9130573  | ../05_Mac | 38.65565 | 9130418  |
| 2L | 11947702 | 11948130 | ../05_Mac | 38.57901 | 11947944 |
| 3R | 32026535 | 32026890 | ../05_Mac | 38.55762 | 32026719 |
| 3R | 19510717 | 19511206 | ../05_Mac | 38.5034  | 19510940 |

|    |          |          |           |          |          |
|----|----------|----------|-----------|----------|----------|
| 3L | 22389891 | 22390660 | ../05_Mac | 41.687   | 22390227 |
| 2R | 21898166 | 21898666 | ../05_Mac | 41.66195 | 21898403 |
| 3L | 10109427 | 10109894 | ../05_Mac | 41.66195 | 10109657 |
| 3R | 5756366  | 5756743  | ../05_Mac | 41.65947 | 5756550  |
| 2L | 12143619 | 12144096 | ../05_Mac | 41.6508  | 12143865 |
| 3L | 1010611  | 1011009  | ../05_Mac | 41.62526 | 1010796  |
| 3L | 6076372  | 6076850  | ../05_Mac | 41.59845 | 6076591  |
| 2L | 16416447 | 16416887 | ../05_Mac | 41.59387 | 16416650 |
| 2R | 11745693 | 11746467 | ../05_Mac | 41.56892 | 11746191 |
| 3L | 21685191 | 21685629 | ../05_Mac | 41.56892 | 21685401 |
| 2L | 85659    | 86957    | ../05_Mac | 41.56837 | 85901    |
| 2L | 16836472 | 16836906 | ../05_Mac | 41.56793 | 16836674 |
| 2L | 14059389 | 14059979 | ../05_Mac | 41.48779 | 14059711 |
| 2L | 15077637 | 15078012 | ../05_Mac | 41.48779 | 15077846 |
| 2L | 17049583 | 17050229 | ../05_Mac | 41.48779 | 17049884 |
| 2L | 20550753 | 20551455 | ../05_Mac | 41.48779 | 20550933 |
| 3L | 5086101  | 5086636  | ../05_Mac | 41.48779 | 5086287  |
| 3R | 27401746 | 27402159 | ../05_Mac | 41.39869 | 27401937 |
| 2L | 17733627 | 17734323 | ../05_Mac | 41.38108 | 17734073 |
| 3R | 31013011 | 31013869 | ../05_Mac | 41.34898 | 31013337 |
| 2R | 22863019 | 22863428 | ../05_Mac | 41.34413 | 22863228 |
| 2R | 5446410  | 5446859  | ../05_Mac | 41.34021 | 5446661  |
| 2R | 19854658 | 19855368 | ../05_Mac | 41.30589 | 19854925 |
| 3L | 3662668  | 3663036  | ../05_Mac | 41.26088 | 3662847  |
| 3L | 5292704  | 5293429  | ../05_Mac | 41.24748 | 5293061  |
| 2R | 5497870  | 5498345  | ../05_Mac | 41.20988 | 5498062  |
| 3L | 20708615 | 20709139 | ../05_Mac | 41.18454 | 20708906 |
| 3L | 1767220  | 1767715  | ../05_Mac | 41.14328 | 1767427  |
| 2R | 13317500 | 13318216 | ../05_Mac | 41.13708 | 13318052 |
| 3R | 28188087 | 28188537 | ../05_Mac | 41.12267 | 28188327 |
| 2L | 16917055 | 16917420 | ../05_Mac | 41.09909 | 16917223 |
| 3L | 16789705 | 16790061 | ../05_Mac | 40.94884 | 16789880 |
| 2R | 18261724 | 18262210 | ../05_Mac | 40.89657 | 18261929 |
| 3R | 5383826  | 5384205  | ../05_Mac | 40.88107 | 5384003  |
| 3R | 24376886 | 24377369 | ../05_Mac | 40.88107 | 24377119 |
| 3L | 16296112 | 16296684 | ../05_Mac | 40.83475 | 16296278 |
| 3L | 3024486  | 3024851  | ../05_Mac | 40.80062 | 3024663  |
| 3R | 23469020 | 23469430 | ../05_Mac | 40.79606 | 23469230 |
| 3L | 22661963 | 22662451 | ../05_Mac | 40.73346 | 22662184 |
| 3R | 21505183 | 21505571 | ../05_Mac | 40.71753 | 21505360 |
| 3R | 13290509 | 13291042 | ../05_Mac | 40.71748 | 13290863 |
| 2R | 4542601  | 4542986  | ../05_Mac | 40.71371 | 4542793  |
| 3R | 9227581  | 9228542  | ../05_Mac | 40.67726 | 9227823  |
| 3R | 27732891 | 27733238 | ../05_Mac | 40.6772  | 27733068 |
| 2L | 4625420  | 4626478  | ../05_Mac | 40.6501  | 4626281  |
| 2R | 1512826  | 1513726  | ../05_Mac | 40.56033 | 1513218  |
| 2R | 10211717 | 10212025 | ../05_Mac | 40.55241 | 10211868 |
| 2R | 15791459 | 15791921 | ../05_Mac | 40.53061 | 15791721 |
| 2L | 9981603  | 9981947  | ../05_Mac | 40.51564 | 9981767  |

|    |          |          |           |          |          |
|----|----------|----------|-----------|----------|----------|
| 2R | 18015384 | 18015893 | ../05_Mac | 38.47514 | 18015658 |
| 3R | 5138696  | 5139400  | ../05_Mac | 38.47514 | 5139181  |
| 2L | 19099667 | 19099969 | ../05_Mac | 38.45107 | 19099837 |
| 2L | 21945997 | 21946676 | ../05_Mac | 38.45107 | 21946467 |
| 2R | 20220873 | 20221285 | ../05_Mac | 38.45107 | 20221060 |
| 3L | 10261098 | 10261462 | ../05_Mac | 38.45107 | 10261252 |
| 3L | 13424476 | 13424886 | ../05_Mac | 38.45107 | 13424648 |
| 3R | 3508128  | 3508513  | ../05_Mac | 38.45107 | 3508321  |
| 3R | 10285980 | 10286451 | ../05_Mac | 38.40754 | 10286197 |
| 3R | 19734981 | 19735386 | ../05_Mac | 38.39717 | 19735209 |
| 2L | 1620411  | 1620717  | ../05_Mac | 38.37175 | 1620539  |
| 2R | 12561894 | 12562225 | ../05_Mac | 38.35012 | 12562038 |
| 2L | 630947   | 631287   | ../05_Mac | 38.26163 | 631092   |
| 2R | 9867409  | 9868842  | ../05_Mac | 38.15618 | 9868527  |
| 2L | 7176101  | 7176535  | ../05_Mac | 38.15499 | 7176346  |
| 2R | 16562943 | 16563374 | ../05_Mac | 38.09716 | 16563138 |
| 3R | 6647531  | 6647936  | ../05_Mac | 38.09309 | 6647713  |
| 3R | 6950475  | 6950985  | ../05_Mac | 38.03456 | 6950658  |
| 2L | 15455633 | 15456100 | ../05_Mac | 37.96721 | 15455858 |
| 2L | 1023935  | 1024447  | ../05_Mac | 37.9351  | 1024136  |
| 3R | 4977199  | 4977602  | ../05_Mac | 37.90998 | 4977404  |
| 2L | 17017848 | 17018278 | ../05_Mac | 37.89909 | 17018107 |
| 2R | 1359308  | 1359675  | ../05_Mac | 37.89909 | 1359493  |
| 2R | 9748300  | 9748940  | ../05_Mac | 37.89909 | 9748496  |
| 2R | 24504093 | 24504449 | ../05_Mac | 37.89909 | 24504277 |
| 2R | 19897623 | 19898001 | ../05_Mac | 37.8687  | 19897807 |
| 3L | 14413446 | 14413817 | ../05_Mac | 37.84641 | 14413627 |
| 2R | 24424909 | 24425272 | ../05_Mac | 37.82431 | 24425097 |
| 2L | 908290   | 908806   | ../05_Mac | 37.77384 | 908501   |
| 2L | 14871753 | 14872246 | ../05_Mac | 37.69668 | 14872048 |
| 3R | 11618731 | 11619120 | ../05_Mac | 37.66803 | 11618900 |
| 2L | 19217076 | 19217468 | ../05_Mac | 37.63811 | 19217262 |
| 3L | 23032548 | 23033019 | ../05_Mac | 37.63811 | 23032733 |
| 3R | 12591644 | 12592167 | ../05_Mac | 37.61155 | 12591873 |
| 3R | 16863516 | 16863979 | ../05_Mac | 37.53898 | 16863767 |
| 2R | 5794904  | 5795576  | ../05_Mac | 37.48922 | 5795336  |
| 2L | 5632472  | 5632822  | ../05_Mac | 37.4662  | 5632640  |
| 3L | 7309249  | 7309633  | ../05_Mac | 37.45054 | 7309433  |
| 2L | 1043771  | 1044127  | ../05_Mac | 37.43145 | 1044000  |
| 3R | 20130146 | 20130684 | ../05_Mac | 37.39389 | 20130468 |
| 3R | 29095151 | 29095585 | ../05_Mac | 37.36517 | 29095407 |
| X  | 19744215 | 19744552 | ../05_Mac | 37.3621  | 19744393 |
| 2L | 16104552 | 16104928 | ../05_Mac | 37.34965 | 16104735 |
| 2L | 19219283 | 19219765 | ../05_Mac | 37.34965 | 19219526 |
| 2R | 20385048 | 20385543 | ../05_Mac | 37.34965 | 20385239 |
| 3L | 17306753 | 17307131 | ../05_Mac | 37.34965 | 17306916 |
| 2L | 9847995  | 9848464  | ../05_Mac | 37.22552 | 9848224  |
| 3R | 26266459 | 26266866 | ../05_Mac | 37.17478 | 26266630 |
| 4  | 1305660  | 1306362  | ../05_Mac | 37.04069 | 1305827  |

|    |          |          |           |          |          |
|----|----------|----------|-----------|----------|----------|
| 3R | 28417481 | 28417941 | ../05_Mac | 40.51564 | 28417753 |
| 4  | 246201   | 246609   | ../05_Mac | 40.51564 | 246390   |
| X  | 20701847 | 20702165 | ../05_Mac | 40.51564 | 20702033 |
| 2L | 1309866  | 1310337  | ../05_Mac | 40.49341 | 1310161  |
| 2R | 20696794 | 20697481 | ../05_Mac | 40.41908 | 20697315 |
| 3L | 21234242 | 21234974 | ../05_Mac | 40.39759 | 21234733 |
| 3L | 17392513 | 17393377 | ../05_Mac | 40.36899 | 17392977 |
| 3L | 8856789  | 8857589  | ../05_Mac | 40.35724 | 8857376  |
| 2L | 16193359 | 16193886 | ../05_Mac | 40.34812 | 16193586 |
| 3R | 28021848 | 28022354 | ../05_Mac | 40.34812 | 28022160 |
| 2R | 11965392 | 11965821 | ../05_Mac | 40.34658 | 11965596 |
| 2R | 17804141 | 17804533 | ../05_Mac | 40.31107 | 17804326 |
| 2L | 23000621 | 23001098 | ../05_Mac | 40.28834 | 23000845 |
| 2L | 15138404 | 15138866 | ../05_Mac | 40.27458 | 15138650 |
| 2L | 4231821  | 4232243  | ../05_Mac | 40.23215 | 4231998  |
| 2L | 13711545 | 13711951 | ../05_Mac | 40.20532 | 13711760 |
| 3R | 11088853 | 11089301 | ../05_Mac | 40.15511 | 11089082 |
| 3L | 8853847  | 8854266  | ../05_Mac | 40.11742 | 8854083  |
| 3L | 1987619  | 1988081  | ../05_Mac | 40.08786 | 1987879  |
| 2R | 23331248 | 23331598 | ../05_Mac | 40.0329  | 23331438 |
| 3L | 9283271  | 9283773  | ../05_Mac | 40.0329  | 9283497  |
| X  | 14430534 | 14430934 | ../05_Mac | 40.0329  | 14430724 |
| 3L | 12767646 | 12768175 | ../05_Mac | 39.97437 | 12767854 |
| 2R | 17641282 | 17641664 | ../05_Mac | 39.94206 | 17641456 |
| 3R | 30530150 | 30530472 | ../05_Mac | 39.93545 | 30530296 |
| 3R | 9031960  | 9032332  | ../05_Mac | 39.92272 | 9032152  |
| 3R | 29613236 | 29614149 | ../05_Mac | 39.90184 | 29613539 |
| 2R | 18929165 | 18929575 | ../05_Mac | 39.8819  | 18929392 |
| 4  | 460637   | 461090   | ../05_Mac | 39.86811 | 460876   |
| 3R | 23277731 | 23278113 | ../05_Mac | 39.85537 | 23277907 |
| 3L | 3999627  | 4000026  | ../05_Mac | 39.85266 | 3999841  |
| 2R | 10745715 | 10746220 | ../05_Mac | 39.84572 | 10745894 |
| 3L | 11153883 | 11154811 | ../05_Mac | 39.84306 | 11154130 |
| 3L | 14586450 | 14587340 | ../05_Mac | 39.81468 | 14587157 |
| 2L | 14866606 | 14866925 | ../05_Mac | 39.78713 | 14866770 |
| 2R | 16302466 | 16302788 | ../05_Mac | 39.68813 | 16302625 |
| 3R | 18995861 | 18996255 | ../05_Mac | 39.67777 | 18996025 |
| 2R | 19907733 | 19908102 | ../05_Mac | 39.65077 | 19907913 |
| 3R | 14170377 | 14170790 | ../05_Mac | 39.64524 | 14170586 |
| 2L | 10687822 | 10688358 | ../05_Mac | 39.56059 | 10688136 |
| 2R | 19075122 | 19075752 | ../05_Mac | 39.55247 | 19075294 |
| 3R | 22116428 | 22116935 | ../05_Mac | 39.55247 | 22116676 |
| X  | 14631759 | 14632125 | ../05_Mac | 39.55247 | 14631948 |
| 3L | 6828373  | 6829157  | ../05_Mac | 39.51302 | 6828566  |
| 3R | 11506486 | 11506827 | ../05_Mac | 39.49678 | 11506655 |
| 3L | 7594355  | 7594743  | ../05_Mac | 39.4796  | 7594535  |
| 3R | 27203539 | 27204079 | ../05_Mac | 39.47038 | 27203879 |
| 2L | 20051849 | 20052333 | ../05_Mac | 39.463   | 20052116 |
| 3L | 7750695  | 7751421  | ../05_Mac | 39.45557 | 7750924  |

|    |          |          |           |          |          |
|----|----------|----------|-----------|----------|----------|
| 3L | 22855908 | 22856296 | ../05_Mac | 37.00057 | 22856118 |
| 3L | 4825612  | 4825958  | ../05_Mac | 36.90821 | 4825774  |
| 3L | 11025310 | 11025698 | ../05_Mac | 36.86296 | 11025467 |
| 3L | 3635445  | 3635990  | ../05_Mac | 36.83358 | 3635842  |
| 2R | 4223887  | 4224409  | ../05_Mac | 36.80281 | 4224090  |
| 2R | 8787020  | 8787382  | ../05_Mac | 36.80281 | 8787210  |
| 3R | 16585452 | 16585831 | ../05_Mac | 36.80281 | 16585664 |
| 3L | 22173788 | 22174275 | ../05_Mac | 36.70012 | 22173991 |
| 3L | 3949140  | 3949651  | ../05_Mac | 36.62423 | 3949363  |
| 3R | 16974970 | 16975346 | ../05_Mac | 36.54049 | 16975148 |
| 3R | 23251332 | 23251669 | ../05_Mac | 36.39699 | 23251510 |
| 3R | 15716405 | 15716851 | ../05_Mac | 36.3311  | 15716621 |
| 3R | 17647400 | 17647758 | ../05_Mac | 36.26706 | 17647577 |
| 2R | 16463523 | 16463931 | ../05_Mac | 36.25939 | 16463749 |
| 3R | 28486772 | 28487130 | ../05_Mac | 36.25939 | 28486937 |
| 3R | 29343721 | 29344113 | ../05_Mac | 36.25939 | 29343940 |
| 3R | 29364622 | 29365044 | ../05_Mac | 36.25939 | 29364863 |
| 3R | 15717944 | 15718303 | ../05_Mac | 36.19924 | 15718138 |
| 3L | 6903951  | 6904488  | ../05_Mac | 36.15551 | 6904273  |
| 3L | 2842106  | 2842502  | ../05_Mac | 36.13784 | 2842304  |
| 3R | 27233546 | 27233915 | ../05_Mac | 36.12917 | 27233717 |
| 3R | 25520723 | 25521826 | ../05_Mac | 36.09771 | 25521539 |
| 2L | 17747992 | 17748370 | ../05_Mac | 36.09372 | 17748173 |
| 2L | 20348338 | 20348828 | ../05_Mac | 36.07493 | 20348649 |
| 3L | 10811995 | 10812439 | ../05_Mac | 36.03002 | 10812234 |
| 3L | 20626729 | 20627288 | ../05_Mac | 35.92111 | 20627057 |
| 3R | 8612480  | 8612872  | ../05_Mac | 35.84092 | 8612672  |
| 3R | 10682400 | 10682810 | ../05_Mac | 35.82676 | 10682590 |
| 3R | 25374036 | 25374641 | ../05_Mac | 35.8181  | 25374217 |
| 2L | 14757858 | 14758236 | ../05_Mac | 35.72782 | 14758044 |
| 2L | 4256909  | 4257738  | ../05_Mac | 35.71877 | 4257544  |
| 2L | 6138993  | 6139654  | ../05_Mac | 35.71877 | 6139318  |
| 2L | 22506985 | 22507470 | ../05_Mac | 35.71877 | 22507202 |
| 2R | 3336124  | 3336411  | ../05_Mac | 35.71877 | 3336283  |
| 2R | 12441107 | 12441515 | ../05_Mac | 35.66561 | 12441299 |
| 3R | 10559773 | 10560292 | ../05_Mac | 35.66359 | 10559954 |
| 3R | 31984187 | 31984796 | ../05_Mac | 35.64943 | 31984434 |
| 3R | 7213765  | 7214139  | ../05_Mac | 35.59829 | 7213945  |
| 3L | 7868857  | 7869330  | ../05_Mac | 35.49895 | 7869008  |
| 3L | 1627850  | 1628234  | ../05_Mac | 35.48737 | 1628042  |
| 3L | 18889938 | 18890351 | ../05_Mac | 35.44305 | 18890118 |
| 2L | 8308476  | 8308750  | ../05_Mac | 35.42902 | 8308626  |
| 2L | 395827   | 396381   | ../05_Mac | 35.39994 | 396097   |
| 3L | 15662892 | 15663352 | ../05_Mac | 35.39994 | 15663117 |
| 3R | 13631643 | 13632088 | ../05_Mac | 35.28595 | 13631889 |
| 3R | 11243287 | 11243785 | ../05_Mac | 35.25096 | 11243608 |
| 2R | 13792089 | 13792694 | ../05_Mac | 35.18723 | 13792253 |
| 3R | 25812207 | 25812718 | ../05_Mac | 35.18723 | 25812489 |
| 2R | 24387374 | 24387725 | ../05_Mac | 35.18339 | 24387546 |

|    |          |          |           |          |          |
|----|----------|----------|-----------|----------|----------|
| 3R | 14558534 | 14558969 | ../05_Mac | 39.44874 | 14558754 |
| 2R | 6887888  | 6888623  | ../05_Mac | 39.43819 | 6888394  |
| 3L | 3683574  | 3684093  | ../05_Mac | 39.43192 | 3683785  |
| 3R | 21076927 | 21077352 | ../05_Mac | 39.42189 | 21077112 |
| 2L | 13470978 | 13471423 | ../05_Mac | 39.41794 | 13471228 |
| 2L | 19327564 | 19327950 | ../05_Mac | 39.40802 | 19327736 |
| 3R | 13397743 | 13398196 | ../05_Mac | 39.37917 | 13398050 |
| 3R | 18610913 | 18611324 | ../05_Mac | 39.36911 | 18611105 |
| 3L | 9951220  | 9951577  | ../05_Mac | 39.34193 | 9951397  |
| 3L | 9463845  | 9464287  | ../05_Mac | 39.2405  | 9464077  |
| 3L | 4010552  | 4011032  | ../05_Mac | 39.22292 | 4010796  |
| 2L | 6542752  | 6543537  | ../05_Mac | 39.18228 | 6542905  |
| 3R | 6077192  | 6077994  | ../05_Mac | 39.12998 | 6077795  |
| 2L | 7573515  | 7573968  | ../05_Mac | 39.11374 | 7573738  |
| 2L | 1478669  | 1479153  | ../05_Mac | 39.09958 | 1478936  |
| 3L | 2938727  | 2939370  | ../05_Mac | 39.09958 | 2938922  |
| 3R | 18617411 | 18617755 | ../05_Mac | 39.07372 | 18617591 |
| 3R | 23513921 | 23514407 | ../05_Mac | 39.07372 | 23514098 |
| 2R | 11504010 | 11504749 | ../05_Mac | 39.03274 | 11504358 |
| 2L | 5654390  | 5654886  | ../05_Mac | 39.02393 | 5654662  |
| 2L | 11672734 | 11673264 | ../05_Mac | 39.00241 | 11673050 |
| 3R | 30589990 | 30590322 | ../05_Mac | 38.99169 | 30590143 |
| 2L | 6451976  | 6452460  | ../05_Mac | 38.96538 | 6452169  |
| 2L | 17991647 | 17992321 | ../05_Mac | 38.95918 | 17991855 |
| 3L | 22157852 | 22158266 | ../05_Mac | 38.75999 | 22158034 |
| 3L | 3634324  | 3634694  | ../05_Mac | 38.74086 | 3634502  |
| 3L | 5078862  | 5079300  | ../05_Mac | 38.67413 | 5079040  |
| 3R | 7087991  | 7088311  | ../05_Mac | 38.65423 | 7088166  |
| 2R | 21101496 | 21101943 | ../05_Mac | 38.61124 | 21101688 |
| 3R | 17353086 | 17353489 | ../05_Mac | 38.61124 | 17353296 |
| 3L | 9279076  | 9279484  | ../05_Mac | 38.59534 | 9279239  |
| 2R | 12393350 | 12393957 | ../05_Mac | 38.56665 | 12393775 |
| 3L | 4793807  | 4794431  | ../05_Mac | 38.56665 | 4794222  |
| 2R | 15150647 | 15151023 | ../05_Mac | 38.56135 | 15150851 |
| 3L | 13292502 | 13292866 | ../05_Mac | 38.56135 | 13292688 |
| 3R | 20653870 | 20654378 | ../05_Mac | 38.55684 | 20654082 |
| 2R | 19510136 | 19510494 | ../05_Mac | 38.5472  | 19510299 |
| 2L | 16233971 | 16234544 | ../05_Mac | 38.5456  | 16234199 |
| 3R | 25853636 | 25853964 | ../05_Mac | 38.54452 | 25853795 |
| 3L | 6327585  | 6328042  | ../05_Mac | 38.53517 | 6327853  |
| 2R | 23136553 | 23137464 | ../05_Mac | 38.45233 | 23136756 |
| 2L | 20542798 | 20543162 | ../05_Mac | 38.38009 | 20542975 |
| 3L | 18621055 | 18621894 | ../05_Mac | 38.37664 | 18621405 |
| 2R | 16816381 | 16816975 | ../05_Mac | 38.36901 | 16816717 |
| 3R | 11392901 | 11393210 | ../05_Mac | 38.3176  | 11393051 |
| 3R | 6742377  | 6742843  | ../05_Mac | 38.28123 | 6742536  |
| 2L | 10553879 | 10554253 | ../05_Mac | 38.24854 | 10554067 |
| 2L | 4804536  | 4804929  | ../05_Mac | 38.24614 | 4804751  |
| 3L | 22240507 | 22241167 | ../05_Mac | 38.2068  | 22240674 |

|    |          |          |           |          |          |
|----|----------|----------|-----------|----------|----------|
| 2L | 22392936 | 22393363 | ../05_Mac | 35.18086 | 22393128 |
| 2R | 20431298 | 20431676 | ../05_Mac | 35.18086 | 20431495 |
| 3R | 7285710  | 7286222  | ../05_Mac | 35.18086 | 7285899  |
| 3R | 27373767 | 27374157 | ../05_Mac | 35.18086 | 27373986 |
| 3L | 4755208  | 4755756  | ../05_Mac | 35.147   | 4755574  |
| 2R | 7394752  | 7395490  | ../05_Mac | 35.14289 | 7394934  |
| 2L | 13459068 | 13459963 | ../05_Mac | 35.06117 | 13459722 |
| 3R | 16229111 | 16229695 | ../05_Mac | 35.05534 | 16229414 |
| 3R | 6759525  | 6759888  | ../05_Mac | 34.9256  | 6759703  |
| 2R | 20949829 | 20950291 | ../05_Mac | 34.88074 | 20950098 |
| 3L | 6603457  | 6603836  | ../05_Mac | 34.84169 | 6603655  |
| 2R | 22138314 | 22139069 | ../05_Mac | 34.81643 | 22138898 |
| 3R | 4878381  | 4878754  | ../05_Mac | 34.805   | 4878548  |
| 3L | 19403707 | 19403998 | ../05_Mac | 34.75192 | 19403847 |
| 3R | 18358322 | 18358773 | ../05_Mac | 34.71076 | 18358558 |
| 2R | 10652165 | 10652642 | ../05_Mac | 34.695   | 10652413 |
| X  | 1375260  | 1375767  | ../05_Mac | 34.67944 | 1375479  |
| 2R | 8259073  | 8259561  | ../05_Mac | 34.64553 | 8259312  |
| 2R | 20887387 | 20887757 | ../05_Mac | 34.64553 | 20887572 |
| 2R | 21583278 | 21583637 | ../05_Mac | 34.64553 | 21583443 |
| 3L | 11872035 | 11872558 | ../05_Mac | 34.64553 | 11872277 |
| 3L | 12326869 | 12327248 | ../05_Mac | 34.64553 | 12327056 |
| 3R | 11535295 | 11535638 | ../05_Mac | 34.64553 | 11535455 |
| 3R | 22807808 | 22808165 | ../05_Mac | 34.64553 | 22807973 |
| 3R | 24746008 | 24746342 | ../05_Mac | 34.64553 | 24746174 |
| X  | 3820524  | 3820869  | ../05_Mac | 34.64553 | 3820697  |
| 3L | 6648473  | 6649414  | ../05_Mac | 34.60408 | 6648772  |
| 3L | 8720830  | 8721538  | ../05_Mac | 34.59128 | 8721005  |
| X  | 6279162  | 6279531  | ../05_Mac | 34.52929 | 6279341  |
| 3R | 21820263 | 21821178 | ../05_Mac | 34.47006 | 21820840 |
| 2L | 6759445  | 6759844  | ../05_Mac | 34.44946 | 6759655  |
| 3L | 13454465 | 13454803 | ../05_Mac | 34.41407 | 13454634 |
| 2L | 16685338 | 16685698 | ../05_Mac | 34.26549 | 16685500 |
| 2L | 17171252 | 17171920 | ../05_Mac | 34.11301 | 17171650 |
| 2R | 9642369  | 9642831  | ../05_Mac | 34.11301 | 9642653  |
| 3L | 4976579  | 4976903  | ../05_Mac | 34.11301 | 4976732  |
| 3R | 6595666  | 6596208  | ../05_Mac | 34.11301 | 6595996  |
| 3R | 17254281 | 17254640 | ../05_Mac | 34.11301 | 17254444 |
| 2R | 17954316 | 17954816 | ../05_Mac | 34.05835 | 17954567 |
| 3L | 3481087  | 3481488  | ../05_Mac | 34.03331 | 3481248  |
| 2R | 13781313 | 13781798 | ../05_Mac | 34.02559 | 13781480 |
| 2R | 6575087  | 6575497  | ../05_Mac | 33.99574 | 6575259  |
| 3R | 6227382  | 6227801  | ../05_Mac | 33.86163 | 6227608  |
| 3R | 11613190 | 11613493 | ../05_Mac | 33.74214 | 11613356 |
| 3R | 21296647 | 21297460 | ../05_Mac | 33.7361  | 21296835 |
| 3R | 25089658 | 25090042 | ../05_Mac | 33.67125 | 25089896 |
| 2R | 22800712 | 22801040 | ../05_Mac | 33.61646 | 22800886 |
| 3R | 7340583  | 7341292  | ../05_Mac | 33.61101 | 7340793  |
| 3L | 13836035 | 13836515 | ../05_Mac | 33.54679 | 13836334 |

|    |          |          |           |          |          |
|----|----------|----------|-----------|----------|----------|
| 2R | 15448532 | 15448923 | ../05_Mac | 38.1834  | 15448730 |
| 2R | 7135551  | 7136012  | ../05_Mac | 38.15464 | 7135753  |
| 2L | 18667920 | 18668335 | ../05_Mac | 38.13802 | 18668103 |
| 2R | 16378524 | 16379147 | ../05_Mac | 38.12397 | 16378685 |
| 2R | 23450537 | 23451209 | ../05_Mac | 38.12397 | 23450842 |
| 3L | 5960986  | 5961339  | ../05_Mac | 38.12397 | 5961164  |
| 3R | 18857953 | 18858444 | ../05_Mac | 38.12397 | 18858267 |
| X  | 10092969 | 10093510 | ../05_Mac | 38.12397 | 10093146 |
| 3L | 10448889 | 10449340 | ../05_Mac | 38.11902 | 10449070 |
| 2R | 15507022 | 15507554 | ../05_Mac | 38.10717 | 15507376 |
| 3R | 9866068  | 9866706  | ../05_Mac | 38.06792 | 9866263  |
| 3R | 29389090 | 29389734 | ../05_Mac | 38.00721 | 29389260 |
| 2L | 9286739  | 9287304  | ../05_Mac | 37.93614 | 9286929  |
| 3L | 6450228  | 6450610  | ../05_Mac | 37.91847 | 6450413  |
| 2L | 10173301 | 10173651 | ../05_Mac | 37.86119 | 10173491 |
| 2R | 13926910 | 13927385 | ../05_Mac | 37.8475  | 13927174 |
| 3L | 22903442 | 22903835 | ../05_Mac | 37.76183 | 22903624 |
| 3R | 18877648 | 18878042 | ../05_Mac | 37.69185 | 18877865 |
| 3R | 17405607 | 17405936 | ../05_Mac | 37.68953 | 17405758 |
| 3L | 6300085  | 6300452  | ../05_Mac | 37.68913 | 6300282  |
| 3L | 11415915 | 11416271 | ../05_Mac | 37.68379 | 11416100 |
| 2L | 13352772 | 13353379 | ../05_Mac | 37.68087 | 13352976 |
| 3L | 642683   | 643036   | ../05_Mac | 37.67633 | 642868   |
| 3L | 11660912 | 11661253 | ../05_Mac | 37.67633 | 11661056 |
| 3L | 19649211 | 19649694 | ../05_Mac | 37.67613 | 19649483 |
| 2L | 9853893  | 9854782  | ../05_Mac | 37.65229 | 9854075  |
| 3L | 2173766  | 2174062  | ../05_Mac | 37.65229 | 2173912  |
| X  | 10518309 | 10518802 | ../05_Mac | 37.65229 | 10518645 |
| X  | 14726661 | 14726985 | ../05_Mac | 37.65229 | 14726803 |
| 2L | 21944617 | 21945109 | ../05_Mac | 37.58771 | 21944812 |
| 2R | 24473182 | 24473551 | ../05_Mac | 37.58771 | 24473369 |
| 3R | 11508502 | 11509271 | ../05_Mac | 37.41447 | 11509028 |
| 3L | 9154864  | 9155305  | ../05_Mac | 37.39944 | 9155054  |
| 3L | 5974055  | 5974579  | ../05_Mac | 37.35402 | 5974363  |
| 2R | 5577834  | 5578212  | ../05_Mac | 37.35248 | 5578017  |
| 2L | 5902564  | 5902994  | ../05_Mac | 37.34045 | 5902744  |
| 3L | 13059707 | 13060327 | ../05_Mac | 37.33575 | 13060138 |
| 2R | 23257458 | 23257842 | ../05_Mac | 37.32743 | 23257664 |
| 2L | 13635135 | 13635493 | ../05_Mac | 37.30442 | 13635319 |
| 3R | 7784409  | 7784820  | ../05_Mac | 37.30442 | 7784615  |
| 3L | 10665838 | 10666324 | ../05_Mac | 37.29388 | 10666031 |
| 2L | 21950813 | 21951246 | ../05_Mac | 37.27277 | 21951063 |
| 2L | 19770766 | 19771247 | ../05_Mac | 37.2696  | 19771021 |
| 2L | 10713845 | 10714537 | ../05_Mac | 37.26428 | 10714282 |
| 3R | 10719174 | 10719638 | ../05_Mac | 37.26428 | 10719441 |
| 3R | 8163232  | 8163665  | ../05_Mac | 37.26105 | 8163387  |
| 3R | 14910686 | 14911341 | ../05_Mac | 37.25641 | 14911152 |
| 2R | 21269110 | 21269741 | ../05_Mac | 37.24924 | 21269581 |
| 3R | 14355934 | 14356364 | ../05_Mac | 37.24916 | 14356129 |

|          |          |          |           |          |          |
|----------|----------|----------|-----------|----------|----------|
| 3R       | 6630792  | 6631267  | ../05_Mac | 33.54679 | 6631075  |
| 3L       | 8318775  | 8319191  | ../05_Mac | 33.54118 | 8318980  |
| 3L       | 8845649  | 8846045  | ../05_Mac | 33.48405 | 8845866  |
| 2R       | 11932996 | 11933377 | ../05_Mac | 33.46768 | 11933180 |
| 3L       | 23025502 | 23026026 | ../05_Mac | 33.35058 | 23025758 |
| 2R       | 10009977 | 10010318 | ../05_Mac | 33.26886 | 10010145 |
| 2R       | 16741019 | 16741481 | ../05_Mac | 33.26886 | 16741221 |
| 3R       | 15833141 | 15833705 | ../05_Mac | 33.25926 | 15833514 |
| 2R       | 13186781 | 13187450 | ../05_Mac | 33.11032 | 13187196 |
| 3R       | 12930499 | 12930889 | ../05_Mac | 33.11032 | 12930697 |
| 4        | 209645   | 210592   | ../05_Mac | 33.06861 | 209907   |
| 3R       | 28836608 | 28837049 | ../05_Mac | 33.06752 | 28836879 |
| 3L       | 17292959 | 17293430 | ../05_Mac | 33.05714 | 17293250 |
| 2L       | 6584211  | 6584721  | ../05_Mac | 33.00436 | 6584402  |
| 3L       | 16302533 | 16302893 | ../05_Mac | 32.9346  | 16302696 |
| 3L       | 12752950 | 12753340 | ../05_Mac | 32.88961 | 12753075 |
| 2L       | 14528099 | 14528980 | ../05_Mac | 32.81727 | 14528678 |
| 3R       | 18023504 | 18023902 | ../05_Mac | 32.80648 | 18023708 |
| 2R       | 7175429  | 7176137  | ../05_Mac | 32.65981 | 7175857  |
| 2R       | 9423942  | 9424495  | ../05_Mac | 32.63916 | 9424326  |
| 3R       | 22864430 | 22865228 | ../05_Mac | 32.59069 | 22865070 |
| 3R       | 21982944 | 21983287 | ../05_Mac | 32.56477 | 21983096 |
| 3L       | 22417359 | 22417797 | ../05_Mac | 32.53486 | 22417597 |
| 2L       | 10099664 | 10100048 | ../05_Mac | 32.53366 | 10099848 |
| 2L       | 12920494 | 12921646 | ../05_Mac | 32.53366 | 12921034 |
| 3L       | 13326120 | 13326558 | ../05_Mac | 32.53366 | 13326309 |
| 3L       | 27670387 | 27671020 | ../05_Mac | 32.53366 | 27670611 |
| 2R       | 14618580 | 14618841 | ../05_Mac | 32.50566 | 14618698 |
| 2L       | 7450808  | 7451160  | ../05_Mac | 32.4856  | 7450998  |
| 3R       | 7627382  | 7627750  | ../05_Mac | 32.4856  | 7627586  |
| 3R       | 18361446 | 18362130 | ../05_Mac | 32.4856  | 18361635 |
| 3L       | 4401271  | 4401606  | ../05_Mac | 32.42975 | 4401420  |
| 2R       | 16083524 | 16083857 | ../05_Mac | 32.40257 | 16083692 |
| 3R       | 20059539 | 20059939 | ../05_Mac | 32.34246 | 20059736 |
| 3L       | 12832596 | 12833004 | ../05_Mac | 32.31671 | 12832769 |
| 2L       | 15317295 | 15317642 | ../05_Mac | 32.26782 | 15317482 |
| 2L       | 12526289 | 12527039 | ../05_Mac | 32.25686 | 12526545 |
| 2L       | 20849197 | 20849541 | ../05_Mac | 32.2557  | 20849357 |
| 3R       | 6240915  | 6241339  | ../05_Mac | 32.20823 | 6241089  |
| 2R       | 5709259  | 5710384  | ../05_Mac | 32.14166 | 5710176  |
| 2R       | 20512937 | 20513356 | ../05_Mac | 32.12581 | 20513202 |
| 2L       | 11744210 | 11744804 | ../05_Mac | 32.08125 | 11744405 |
| 3L       | 13343644 | 13344484 | ../05_Mac | 32.05626 | 13344301 |
| 3R       | 26450410 | 26450934 | ../05_Mac | 32.04208 | 26450674 |
| 2.11E+14 | 653      | 942      | ../05_Mac | 32.01274 | 809      |
| 3R       | 5985482  | 5985952  | ../05_Mac | 32.01274 | 5985752  |
| 2R       | 6341195  | 6341622  | ../05_Mac | 32.01114 | 6341379  |
| 2R       | 25054457 | 25054968 | ../05_Mac | 31.99494 | 25054775 |
| 2L       | 21623373 | 21624860 | ../05_Mac | 31.95915 | 21623637 |

|    |          |          |           |          |          |
|----|----------|----------|-----------|----------|----------|
| 2L | 386816   | 387201   | ../05_Mac | 37.2451  | 387001   |
| 3L | 476877   | 477246   | ../05_Mac | 37.24375 | 477056   |
| 3R | 11923448 | 11923909 | ../05_Mac | 37.24375 | 11923661 |
| 2R | 24711508 | 24711897 | ../05_Mac | 37.18132 | 24711700 |
| 3R | 4547118  | 4547575  | ../05_Mac | 37.18132 | 4547282  |
| X  | 10646144 | 10646463 | ../05_Mac | 37.18132 | 10646302 |
| X  | 12294724 | 12295159 | ../05_Mac | 37.18132 | 12294944 |
| 3R | 11316018 | 11316540 | ../05_Mac | 37.09933 | 11316225 |
| 3R | 12863521 | 12864089 | ../05_Mac | 37.07047 | 12863771 |
| 2R | 18991142 | 18991553 | ../05_Mac | 37.0487  | 18991297 |
| 3R | 5909918  | 5910667  | ../05_Mac | 37.0487  | 5910182  |
| 3L | 25611691 | 25612128 | ../05_Mac | 37.00961 | 25611942 |
| 3L | 3622635  | 3622959  | ../05_Mac | 37.00859 | 3622794  |
| 2L | 13335068 | 13335889 | ../05_Mac | 36.99072 | 13335582 |
| 2L | 16436964 | 16437276 | ../05_Mac | 36.99009 | 16437127 |
| 3R | 25366766 | 25367515 | ../05_Mac | 36.89719 | 25367248 |
| 2R | 15755803 | 15756172 | ../05_Mac | 36.87857 | 15755982 |
| 3L | 11383193 | 11383842 | ../05_Mac | 36.87857 | 11383422 |
| 3L | 6452359  | 6452896  | ../05_Mac | 36.85477 | 6452592  |
| 2L | 11220634 | 11220999 | ../05_Mac | 36.84171 | 11220824 |
| 3L | 3966415  | 3967055  | ../05_Mac | 36.83657 | 3966716  |
| 2R | 22720925 | 22721788 | ../05_Mac | 36.81894 | 22721236 |
| 3L | 21816341 | 21816807 | ../05_Mac | 36.81183 | 21816611 |
| 2R | 1185105  | 1185450  | ../05_Mac | 36.71281 | 1185267  |
| 3R | 6535681  | 6536279  | ../05_Mac | 36.71281 | 6536069  |
| X  | 1004484  | 1004839  | ../05_Mac | 36.71281 | 1004660  |
| 3L | 13514175 | 13514627 | ../05_Mac | 36.66138 | 13514356 |
| 3R | 21423600 | 21423951 | ../05_Mac | 36.64475 | 21423754 |
| 2L | 9141576  | 9142688  | ../05_Mac | 36.59694 | 9142484  |
| 2L | 19759186 | 19759541 | ../05_Mac | 36.55337 | 19759364 |
| 2R | 12388134 | 12388541 | ../05_Mac | 36.48615 | 12388325 |
| 2R | 22968501 | 22968804 | ../05_Mac | 36.48615 | 22968652 |
| 2L | 18399688 | 18400780 | ../05_Mac | 36.46098 | 18400522 |
| 3L | 6557107  | 6557432  | ../05_Mac | 36.44971 | 6557284  |
| 2R | 14452119 | 14452522 | ../05_Mac | 36.40665 | 14452315 |
| 2R | 8746120  | 8746539  | ../05_Mac | 36.40219 | 8746331  |
| 3R | 21388472 | 21388902 | ../05_Mac | 36.38889 | 21388705 |
| 2L | 12319221 | 12319977 | ../05_Mac | 36.38139 | 12319460 |
| 3R | 21318284 | 21318737 | ../05_Mac | 36.37968 | 21318551 |
| 2L | 4840121  | 4840511  | ../05_Mac | 36.32985 | 4840295  |
| 3L | 3577816  | 3578176  | ../05_Mac | 36.32985 | 3578006  |
| 2L | 7523359  | 7523892  | ../05_Mac | 36.29285 | 7523664  |
| 2R | 20343997 | 20344413 | ../05_Mac | 36.2463  | 20344215 |
| 3L | 4913268  | 4913611  | ../05_Mac | 36.2463  | 4913434  |
| 3L | 7290541  | 7290965  | ../05_Mac | 36.2463  | 7290782  |
| 3R | 1398479  | 1398797  | ../05_Mac | 36.2463  | 1398642  |
| 3R | 28424642 | 28425063 | ../05_Mac | 36.2463  | 28424805 |
| 2L | 15837858 | 15838239 | ../05_Mac | 36.1832  | 15838049 |
| 3R | 11312309 | 11312674 | ../05_Mac | 36.1623  | 11312492 |

|    |          |          |           |          |          |
|----|----------|----------|-----------|----------|----------|
| 2L | 17317616 | 17317993 | ../05_Mac | 31.94424 | 17317795 |
| 2R | 16612041 | 16612631 | ../05_Mac | 31.86335 | 16612229 |
| 2R | 15331252 | 15331670 | ../05_Mac | 31.86124 | 15331458 |
| 3R | 31726984 | 31727324 | ../05_Mac | 31.81656 | 31727136 |
| 2R | 15378137 | 15378493 | ../05_Mac | 31.79346 | 15378319 |
| 3L | 13365643 | 13366343 | ../05_Mac | 31.77885 | 13366132 |
| 2R | 11114370 | 11114817 | ../05_Mac | 31.53726 | 11114646 |
| 2L | 17714234 | 17714754 | ../05_Mac | 31.51894 | 17714509 |
| 3R | 24515359 | 24516089 | ../05_Mac | 31.51814 | 24515913 |
| 3L | 2124385  | 2124722  | ../05_Mac | 31.49514 | 2124540  |
| 3R | 11118489 | 11118809 | ../05_Mac | 31.49514 | 11118641 |
| 3R | 17506888 | 17507477 | ../05_Mac | 31.49514 | 17507287 |
| 2L | 18403478 | 18403956 | ../05_Mac | 31.42947 | 18403742 |
| 3L | 22351274 | 22351617 | ../05_Mac | 31.40361 | 22351455 |
| 3R | 31592232 | 31593244 | ../05_Mac | 31.38786 | 31593048 |
| 3R | 5299946  | 5300282  | ../05_Mac | 31.3366  | 5300090  |
| 3R | 21566033 | 21566459 | ../05_Mac | 31.23156 | 21566259 |
| 2R | 6990703  | 6991388  | ../05_Mac | 31.15664 | 6990870  |
| 3R | 11599051 | 11599417 | ../05_Mac | 31.15071 | 11599202 |
| 3R | 17533788 | 17534236 | ../05_Mac | 31.15018 | 17534032 |
| 2R | 10568176 | 10568819 | ../05_Mac | 31.13939 | 10568622 |
| 2L | 7629437  | 7629767  | ../05_Mac | 31.12581 | 7629595  |
| 4  | 1316740  | 1317276  | ../05_Mac | 31.08895 | 1317053  |
| 3L | 11582903 | 11583239 | ../05_Mac | 31.07812 | 11583053 |
| 2R | 23501841 | 23502209 | ../05_Mac | 31.07509 | 23502022 |
| 3R | 25355054 | 25355507 | ../05_Mac | 30.94304 | 25355251 |
| 2L | 2972852  | 2973359  | ../05_Mac | 30.90941 | 2973160  |
| 2L | 5616478  | 5616838  | ../05_Mac | 30.86953 | 5616650  |
| 3L | 5796243  | 5796587  | ../05_Mac | 30.84919 | 5796428  |
| X  | 11806047 | 11806582 | ../05_Mac | 30.78154 | 11806390 |
| 2L | 15547269 | 15547671 | ../05_Mac | 30.71619 | 15547462 |
| 2L | 3094514  | 3094980  | ../05_Mac | 30.70912 | 3094733  |
| 3L | 7754096  | 7754512  | ../05_Mac | 30.70912 | 7754299  |
| 2R | 11085313 | 11085737 | ../05_Mac | 30.68983 | 11085515 |
| 2R | 18453681 | 18454058 | ../05_Mac | 30.64792 | 18453852 |
| 2R | 5970582  | 5971140  | ../05_Mac | 30.62366 | 5970869  |
| 3R | 30019379 | 30019729 | ../05_Mac | 30.55834 | 30019574 |
| 3L | 4222577  | 4223014  | ../05_Mac | 30.54369 | 4222797  |
| 3R | 12692504 | 12692844 | ../05_Mac | 30.54118 | 12692676 |
| 3R | 14423376 | 14423676 | ../05_Mac | 30.52634 | 14423517 |
| 2R | 24295206 | 24295690 | ../05_Mac | 30.51298 | 24295465 |
| 3R | 7499503  | 7500155  | ../05_Mac | 30.51298 | 7499780  |
| 2L | 3823702  | 3824194  | ../05_Mac | 30.50383 | 3823985  |
| 3L | 14031426 | 14031834 | ../05_Mac | 30.47096 | 14031617 |
| 2R | 20432211 | 20432731 | ../05_Mac | 30.46801 | 20432400 |
| 2L | 21851511 | 21851931 | ../05_Mac | 30.44915 | 21851770 |
| 2L | 5430803  | 5431325  | ../05_Mac | 30.44877 | 5430951  |
| 2L | 21899593 | 21900005 | ../05_Mac | 30.44877 | 21899744 |
| 3R | 31383258 | 31383646 | ../05_Mac | 30.44877 | 31383448 |

|    |          |          |           |          |          |
|----|----------|----------|-----------|----------|----------|
| 3L | 15367959 | 15368449 | ../05_Mac | 36.1425  | 15368140 |
| 2R | 15406960 | 15407339 | ../05_Mac | 36.12382 | 15407171 |
| 2R | 24417611 | 24418015 | ../05_Mac | 36.10466 | 24417830 |
| 2L | 18906798 | 18907453 | ../05_Mac | 36.08969 | 18906961 |
| 3L | 9013012  | 9013450  | ../05_Mac | 36.08242 | 9013195  |
| 3L | 7327251  | 7327645  | ../05_Mac | 36.07481 | 7327444  |
| 3L | 7648318  | 7649000  | ../05_Mac | 36.07412 | 7648835  |
| 3L | 17749213 | 17749612 | ../05_Mac | 36.03687 | 17749414 |
| 2L | 16557630 | 16558181 | ../05_Mac | 36.03097 | 16557765 |
| 3L | 11964821 | 11965400 | ../05_Mac | 36.01114 | 11965014 |
| 3R | 15580868 | 15581239 | ../05_Mac | 36.00132 | 15581033 |
| 3R | 31676728 | 31677133 | ../05_Mac | 35.93068 | 31676899 |
| 3L | 8782383  | 8782850  | ../05_Mac | 35.91451 | 8782586  |
| 3L | 471156   | 471527   | ../05_Mac | 35.89538 | 471347   |
| 2R | 19042983 | 19043408 | ../05_Mac | 35.78191 | 19043214 |
| 3L | 5068006  | 5068311  | ../05_Mac | 35.78191 | 5068164  |
| 3R | 27834911 | 27835319 | ../05_Mac | 35.78191 | 27835087 |
| 3R | 28216347 | 28216738 | ../05_Mac | 35.78191 | 28216556 |
| X  | 384304   | 384610   | ../05_Mac | 35.78191 | 384437   |
| 2L | 19929648 | 19930210 | ../05_Mac | 35.78133 | 19929839 |
| 3L | 21730032 | 21730467 | ../05_Mac | 35.77538 | 21730245 |
| 3L | 16042401 | 16042986 | ../05_Mac | 35.75935 | 16042576 |
| 3R | 31251580 | 31252049 | ../05_Mac | 35.72429 | 31251863 |
| 2L | 4135416  | 4135810  | ../05_Mac | 35.68191 | 4135662  |
| 3L | 13321326 | 13321753 | ../05_Mac | 35.66474 | 13321515 |
| 2L | 18909835 | 18910265 | ../05_Mac | 35.61933 | 18909993 |
| 2L | 18744561 | 18744962 | ../05_Mac | 35.60334 | 18744771 |
| 2L | 16237591 | 16237988 | ../05_Mac | 35.59369 | 16237792 |
| 2R | 17117423 | 17117817 | ../05_Mac | 35.55956 | 17117653 |
| 3R | 22168125 | 22168717 | ../05_Mac | 35.54715 | 22168411 |
| 2R | 19985256 | 19985642 | ../05_Mac | 35.54009 | 19985417 |
| 3R | 6412803  | 6413292  | ../05_Mac | 35.52582 | 6412993  |
| 2L | 15865019 | 15865337 | ../05_Mac | 35.5251  | 15865194 |
| 2R | 21968081 | 21968488 | ../05_Mac | 35.52156 | 21968269 |
| 3L | 20204881 | 20205212 | ../05_Mac | 35.51956 | 20205031 |
| 2L | 21777415 | 21777837 | ../05_Mac | 35.51505 | 21777591 |
| 3L | 6677667  | 6678419  | ../05_Mac | 35.50411 | 6678215  |
| 3R | 20023313 | 20023850 | ../05_Mac | 35.49924 | 20023518 |
| 2R | 20928244 | 20928673 | ../05_Mac | 35.46135 | 20928502 |
| 3R | 16284802 | 16285490 | ../05_Mac | 35.43792 | 16285042 |
| 2L | 9423705  | 9424526  | ../05_Mac | 35.40519 | 9423965  |
| 3R | 23608285 | 23608604 | ../05_Mac | 35.37196 | 23608430 |
| 2L | 2511785  | 2512138  | ../05_Mac | 35.31927 | 2511975  |
| 2R | 8291688  | 8292106  | ../05_Mac | 35.31927 | 8291901  |
| 2R | 8853663  | 8854060  | ../05_Mac | 35.31927 | 8853875  |
| 2R | 19062203 | 19062921 | ../05_Mac | 35.31927 | 19062504 |
| 3R | 1960714  | 1961092  | ../05_Mac | 35.31927 | 1960923  |
| 3R | 9284471  | 9284856  | ../05_Mac | 35.31927 | 9284671  |
| 3R | 17565105 | 17565416 | ../05_Mac | 35.31927 | 17565239 |

|          |          |          |           |          |          |
|----------|----------|----------|-----------|----------|----------|
| 3R       | 16156746 | 16157454 | ../05_Mac | 30.42968 | 16157195 |
| 3L       | 4724119  | 4724900  | ../05_Mac | 30.39145 | 4724575  |
| 2L       | 18723716 | 18724087 | ../05_Mac | 30.37962 | 18723902 |
| 3R       | 22970316 | 22970767 | ../05_Mac | 30.3327  | 22970590 |
| 2R       | 23926403 | 23926773 | ../05_Mac | 30.28445 | 23926589 |
| 2R       | 9865472  | 9865860  | ../05_Mac | 30.22007 | 9865675  |
| 3L       | 2236947  | 2237426  | ../05_Mac | 30.19998 | 2237122  |
| 2R       | 14437227 | 14437601 | ../05_Mac | 30.10817 | 14437414 |
| 2R       | 9603509  | 9603931  | ../05_Mac | 30.09142 | 9603745  |
| 2L       | 10903945 | 10904658 | ../05_Mac | 30.07674 | 10904124 |
| 2R       | 22613200 | 22613553 | ../05_Mac | 30.04802 | 22613375 |
| 3R       | 21568986 | 21569345 | ../05_Mac | 30.04802 | 21569147 |
| X        | 6681512  | 6681885  | ../05_Mac | 30.01561 | 6681722  |
| 3L       | 1558270  | 1558654  | ../05_Mac | 29.99267 | 1558423  |
| 2R       | 21730432 | 21730791 | ../05_Mac | 29.97479 | 21730610 |
| 3R       | 22500925 | 22501304 | ../05_Mac | 29.97479 | 22501121 |
| 3R       | 28777276 | 28777723 | ../05_Mac | 29.97094 | 28777463 |
| 2R       | 24575719 | 24576390 | ../05_Mac | 29.96106 | 24575914 |
| 2L       | 2652912  | 2653330  | ../05_Mac | 29.95865 | 2653099  |
| 2L       | 15486349 | 15486748 | ../05_Mac | 29.95865 | 15486552 |
| 2R       | 1579383  | 1579742  | ../05_Mac | 29.95865 | 1579527  |
| 3L       | 18580744 | 18581091 | ../05_Mac | 29.95865 | 18580923 |
| 3L       | 22109810 | 22110131 | ../05_Mac | 29.95865 | 22109975 |
| 3L       | 22503664 | 22504491 | ../05_Mac | 29.95865 | 22503877 |
| 3R       | 11003482 | 11003981 | ../05_Mac | 29.95865 | 11003657 |
| X        | 4419095  | 4419407  | ../05_Mac | 29.95865 | 4419236  |
| X        | 20327309 | 20327582 | ../05_Mac | 29.95865 | 20327430 |
| 3L       | 3036466  | 3036810  | ../05_Mac | 29.95185 | 3036639  |
| 3L       | 15283378 | 15283913 | ../05_Mac | 29.90037 | 15283576 |
| 3R       | 6186903  | 6187315  | ../05_Mac | 29.90037 | 6187166  |
| 3R       | 14889893 | 14890250 | ../05_Mac | 29.87296 | 14890058 |
| 3L       | 12188317 | 12188843 | ../05_Mac | 29.86556 | 12188699 |
| 2R       | 8252663  | 8253102  | ../05_Mac | 29.85028 | 8252843  |
| 2R       | 18540953 | 18541320 | ../05_Mac | 29.84123 | 18541127 |
| 2L       | 2023774  | 2024186  | ../05_Mac | 29.78965 | 2023986  |
| 3L       | 15026042 | 15026480 | ../05_Mac | 29.78426 | 15026321 |
| 3R       | 19125052 | 19125436 | ../05_Mac | 29.7175  | 19125244 |
| 2.11E+14 | 1958     | 2249     | ../05_Mac | 29.66724 | 2086     |
| 2L       | 19205128 | 19205477 | ../05_Mac | 29.63665 | 19205279 |
| 2R       | 22818353 | 22819019 | ../05_Mac | 29.63665 | 22818785 |
| X        | 792749   | 793087   | ../05_Mac | 29.58033 | 792934   |
| 2L       | 13323518 | 13324002 | ../05_Mac | 29.53079 | 13323679 |
| 2R       | 14273088 | 14273800 | ../05_Mac | 29.51989 | 14273279 |
| 3R       | 27595359 | 27595813 | ../05_Mac | 29.46899 | 27595599 |
| 2L       | 4252888  | 4253257  | ../05_Mac | 29.45246 | 4253076  |
| 3R       | 22953837 | 22954202 | ../05_Mac | 29.45246 | 22954016 |
| X        | 17588649 | 17589009 | ../05_Mac | 29.45246 | 17588812 |
| X        | 20413456 | 20413847 | ../05_Mac | 29.45246 | 20413607 |
| X        | 6037088  | 6037453  | ../05_Mac | 29.43687 | 6037254  |

|    |          |          |           |          |          |
|----|----------|----------|-----------|----------|----------|
| 3R | 29580111 | 29580594 | ../05_Mac | 35.22299 | 29580384 |
| 2L | 6272366  | 6272755  | ../05_Mac | 35.20728 | 6272547  |
| 2L | 6829472  | 6829822  | ../05_Mac | 35.19272 | 6829641  |
| 3R | 10478922 | 10479417 | ../05_Mac | 35.19272 | 10479237 |
| 2R | 7642010  | 7642377  | ../05_Mac | 35.14508 | 7642192  |
| 2L | 7592928  | 7593653  | ../05_Mac | 35.14274 | 7593141  |
| 2L | 11319775 | 11320053 | ../05_Mac | 35.13445 | 11319885 |
| 2L | 9309720  | 9310138  | ../05_Mac | 35.12551 | 9309944  |
| 2R | 11360938 | 11361282 | ../05_Mac | 35.12367 | 11361108 |
| 2R | 20927285 | 20927675 | ../05_Mac | 35.09875 | 20927486 |
| 3L | 13425163 | 13425632 | ../05_Mac | 35.09244 | 13425354 |
| 2L | 3840775  | 3841127  | ../05_Mac | 35.08447 | 3840941  |
| 2R | 19322826 | 19323169 | ../05_Mac | 34.88597 | 19323012 |
| 2R | 23368548 | 23368971 | ../05_Mac | 34.87038 | 23368777 |
| 2R | 12114463 | 12114976 | ../05_Mac | 34.85902 | 12114779 |
| 3R | 12757651 | 12758266 | ../05_Mac | 34.85902 | 12757923 |
| 3R | 21607651 | 21607965 | ../05_Mac | 34.85902 | 21607793 |
| 3R | 27321470 | 27321867 | ../05_Mac | 34.85902 | 27321657 |
| 3R | 28228832 | 28229669 | ../05_Mac | 34.85902 | 28229438 |
| 2L | 4278108  | 4278510  | ../05_Mac | 34.77759 | 4278317  |
| 3L | 11317449 | 11317991 | ../05_Mac | 34.7353  | 11317666 |
| 2R | 20116895 | 20117227 | ../05_Mac | 34.7289  | 20117046 |
| 3L | 16027119 | 16027801 | ../05_Mac | 34.69828 | 16027630 |
| 2L | 4792561  | 4793008  | ../05_Mac | 34.68799 | 4792774  |
| 2L | 12820143 | 12820533 | ../05_Mac | 34.67773 | 12820327 |
| 2R | 13324527 | 13324899 | ../05_Mac | 34.67215 | 13324712 |
| 3R | 17337106 | 17337464 | ../05_Mac | 34.66802 | 17337292 |
| 2R | 19855925 | 19856387 | ../05_Mac | 34.66711 | 19856079 |
| 2L | 11192415 | 11192779 | ../05_Mac | 34.66271 | 11192577 |
| 2R | 16088759 | 16089174 | ../05_Mac | 34.65888 | 16088970 |
| 3R | 5999628  | 6000166  | ../05_Mac | 34.65558 | 5999873  |
| 3R | 22429607 | 22430173 | ../05_Mac | 34.65315 | 22429974 |
| 2R | 20182689 | 20183041 | ../05_Mac | 34.65304 | 20182827 |
| 2R | 20224492 | 20224988 | ../05_Mac | 34.65133 | 20224804 |
| 3L | 16832324 | 16832944 | ../05_Mac | 34.65133 | 16832772 |
| 3L | 18876571 | 18876897 | ../05_Mac | 34.63613 | 18876719 |
| 2R | 20044203 | 20044879 | ../05_Mac | 34.59078 | 20044645 |
| 3L | 22716350 | 22716946 | ../05_Mac | 34.5737  | 22716598 |
| 3R | 26929248 | 26930001 | ../05_Mac | 34.52612 | 26929415 |
| 3R | 15648698 | 15649142 | ../05_Mac | 34.51739 | 15648943 |
| 3L | 1199777  | 1200800  | ../05_Mac | 34.51104 | 1200256  |
| 2L | 18814767 | 18815249 | ../05_Mac | 34.46682 | 18815003 |
| X  | 355893   | 356665   | ../05_Mac | 34.40694 | 356397   |
| 2L | 10109148 | 10109450 | ../05_Mac | 34.40097 | 10109271 |
| 2R | 659124   | 659471   | ../05_Mac | 34.40097 | 659276   |
| 3R | 9562831  | 9563283  | ../05_Mac | 34.36025 | 9563029  |
| 3R | 26012124 | 26012852 | ../05_Mac | 34.33069 | 26012322 |
| 3R | 19286738 | 19287153 | ../05_Mac | 34.31187 | 19286943 |
| 2L | 15243742 | 15244071 | ../05_Mac | 34.29888 | 15243899 |

|          |          |          |           |          |          |
|----------|----------|----------|-----------|----------|----------|
| 3L       | 12246015 | 12246489 | ../05_Mac | 29.39786 | 12246232 |
| 3R       | 18171238 | 18171618 | ../05_Mac | 29.36041 | 18171404 |
| 4        | 1303934  | 1304810  | ../05_Mac | 29.34858 | 1304561  |
| 3L       | 349406   | 349849   | ../05_Mac | 29.27995 | 349582   |
| 3L       | 1471901  | 1472299  | ../05_Mac | 29.26596 | 1472126  |
| 3R       | 26178494 | 26178944 | ../05_Mac | 29.26424 | 26178733 |
| 3L       | 16557229 | 16557631 | ../05_Mac | 29.24156 | 16557434 |
| 2R       | 14037479 | 14037864 | ../05_Mac | 29.21848 | 14037676 |
| 2R       | 7229753  | 7230136  | ../05_Mac | 29.17457 | 7229907  |
| 3L       | 21088857 | 21089297 | ../05_Mac | 29.07471 | 21089035 |
| 2L       | 4352760  | 4353254  | ../05_Mac | 28.98566 | 4352951  |
| 3R       | 10897485 | 10898399 | ../05_Mac | 28.98566 | 10897656 |
| 2L       | 20947948 | 20948434 | ../05_Mac | 28.98155 | 20948238 |
| Unmapped | 6032     | 6539     | ../05_Mac | 28.95956 | 6201     |
| 3R       | 5914184  | 5914514  | ../05_Mac | 28.94951 | 5914340  |
| 3R       | 12183193 | 12183543 | ../05_Mac | 28.94951 | 12183355 |
| 3R       | 24406699 | 24407440 | ../05_Mac | 28.94951 | 24407120 |
| 3L       | 8790749  | 8791094  | ../05_Mac | 28.88417 | 8790926  |
| 3R       | 22350847 | 22351231 | ../05_Mac | 28.81739 | 22350997 |
| 2R       | 20885924 | 20886452 | ../05_Mac | 28.80533 | 20886215 |
| 2R       | 6533438  | 6533795  | ../05_Mac | 28.74462 | 6533613  |
| 2.11E+14 | 11375    | 11743    | ../05_Mac | 28.73933 | 11556    |
| 2R       | 22002326 | 22002726 | ../05_Mac | 28.70223 | 22002499 |
| 4        | 984785   | 985231   | ../05_Mac | 28.68182 | 985050   |
| 2L       | 20046431 | 20046922 | ../05_Mac | 28.66932 | 20046686 |
| 3L       | 17128240 | 17128655 | ../05_Mac | 28.56662 | 17128458 |
| 3R       | 15154816 | 15155317 | ../05_Mac | 28.52268 | 15155098 |
| 3L       | 5061513  | 5061851  | ../05_Mac | 28.50882 | 5061674  |
| 3R       | 17749203 | 17749653 | ../05_Mac | 28.50882 | 17749383 |
| 2L       | 21798924 | 21799377 | ../05_Mac | 28.50577 | 21799209 |
| 2L       | 18103392 | 18104159 | ../05_Mac | 28.45144 | 18103947 |
| 2R       | 12060202 | 12060550 | ../05_Mac | 28.44963 | 12060358 |
| 2R       | 15034125 | 15034529 | ../05_Mac | 28.44963 | 15034335 |
| 3L       | 2951483  | 2951923  | ../05_Mac | 28.44963 | 2951658  |
| 3L       | 15042375 | 15042804 | ../05_Mac | 28.44963 | 15042523 |
| X        | 20051135 | 20051457 | ../05_Mac | 28.44963 | 20051286 |
| 3R       | 22616296 | 22616678 | ../05_Mac | 28.4379  | 22616463 |
| X        | 21116333 | 21116691 | ../05_Mac | 28.40031 | 21116518 |
| 2R       | 25253228 | 25253901 | ../05_Mac | 28.33322 | 25253703 |
| 2L       | 3515127  | 3515479  | ../05_Mac | 28.33101 | 3515279  |
| 2L       | 17498672 | 17499030 | ../05_Mac | 28.32745 | 17498867 |
| 3L       | 4042329  | 4042661  | ../05_Mac | 28.32589 | 4042499  |
| 2R       | 13715820 | 13716168 | ../05_Mac | 28.32109 | 13715979 |
| 2R       | 22752864 | 22753316 | ../05_Mac | 28.32109 | 22753100 |
| 3R       | 12952035 | 12952414 | ../05_Mac | 28.28992 | 12952230 |
| 3R       | 15382762 | 15383212 | ../05_Mac | 28.28992 | 15383032 |
| 2L       | 563993   | 564395   | ../05_Mac | 28.28933 | 564197   |
| 3R       | 8141379  | 8141763  | ../05_Mac | 28.25395 | 8141554  |
| 2L       | 12317122 | 12317539 | ../05_Mac | 28.16011 | 12317350 |

|    |          |          |           |          |          |
|----|----------|----------|-----------|----------|----------|
| 2R | 7561785  | 7562143  | ../05_Mac | 34.28711 | 7561960  |
| 3R | 25534342 | 25535003 | ../05_Mac | 34.28014 | 25534771 |
| 2L | 8738181  | 8738733  | ../05_Mac | 34.27372 | 8738543  |
| 2R | 13817759 | 13818113 | ../05_Mac | 34.25644 | 13817939 |
| 2R | 11230549 | 11230960 | ../05_Mac | 34.24977 | 11230720 |
| 3L | 5001397  | 5001990  | ../05_Mac | 34.23747 | 5001615  |
| 3R | 11729263 | 11729924 | ../05_Mac | 34.23747 | 11729712 |
| 3R | 6081182  | 6081642  | ../05_Mac | 34.22779 | 6081372  |
| 3L | 12342066 | 12342502 | ../05_Mac | 34.22529 | 12342343 |
| 3L | 5087701  | 5088151  | ../05_Mac | 34.22409 | 5087935  |
| 3R | 26102147 | 26102668 | ../05_Mac | 34.2212  | 26102463 |
| 4  | 1082125  | 1083190  | ../05_Mac | 34.19623 | 1082576  |
| 3L | 9682679  | 9683036  | ../05_Mac | 34.17514 | 9682875  |
| 3L | 1001507  | 1001871  | ../05_Mac | 34.16874 | 1001662  |
| 2R | 9420313  | 9420715  | ../05_Mac | 34.15576 | 9420482  |
| 2L | 3581447  | 3581935  | ../05_Mac | 34.07621 | 3581617  |
| 3L | 7073211  | 7073709  | ../05_Mac | 34.05714 | 7073539  |
| 3R | 25318474 | 25318809 | ../05_Mac | 33.96949 | 25318652 |
| 2R | 20626342 | 20626708 | ../05_Mac | 33.9663  | 20626539 |
| 2L | 1323243  | 1323835  | ../05_Mac | 33.94512 | 1323657  |
| 2L | 2077552  | 2077975  | ../05_Mac | 33.94512 | 2077750  |
| 2R | 2242580  | 2243042  | ../05_Mac | 33.94512 | 2242824  |
| 2R | 8301118  | 8301529  | ../05_Mac | 33.94512 | 8301295  |
| 3L | 9313318  | 9313902  | ../05_Mac | 33.94512 | 9313509  |
| 3R | 13923646 | 13923998 | ../05_Mac | 33.94512 | 13923807 |
| 3R | 19015673 | 19016021 | ../05_Mac | 33.91959 | 19015850 |
| 2L | 21910026 | 21910875 | ../05_Mac | 33.90725 | 21910685 |
| 2L | 8359020  | 8359363  | ../05_Mac | 33.88161 | 8359187  |
| 2R | 1335833  | 1336176  | ../05_Mac | 33.85966 | 1335994  |
| 2L | 10551390 | 10551995 | ../05_Mac | 33.84845 | 10551569 |
| 2L | 2679072  | 2679487  | ../05_Mac | 33.83833 | 2679261  |
| 2L | 17285654 | 17285986 | ../05_Mac | 33.83833 | 17285799 |
| 3L | 21329745 | 21330091 | ../05_Mac | 33.83697 | 21329896 |
| 2R | 21837632 | 21838057 | ../05_Mac | 33.80393 | 21837850 |
| 3L | 9519590  | 9520255  | ../05_Mac | 33.80134 | 9520016  |
| 3R | 23368114 | 23368797 | ../05_Mac | 33.79918 | 23368606 |
| 2R | 15168505 | 15168905 | ../05_Mac | 33.79162 | 15168708 |
| 2R | 18302939 | 18303392 | ../05_Mac | 33.7888  | 18303129 |
| 3R | 17202974 | 17203525 | ../05_Mac | 33.7888  | 17203198 |
| 3L | 1816314  | 1816654  | ../05_Mac | 33.78431 | 1816499  |
| 3L | 21185706 | 21186544 | ../05_Mac | 33.74957 | 21186001 |
| 3L | 1206546  | 1206940  | ../05_Mac | 33.65081 | 1206769  |
| 2L | 112623   | 113015   | ../05_Mac | 33.64742 | 112801   |
| 2L | 6277088  | 6277765  | ../05_Mac | 33.64742 | 6277263  |
| 3L | 14074846 | 14075248 | ../05_Mac | 33.59674 | 14075018 |
| 3R | 21907239 | 21907719 | ../05_Mac | 33.53532 | 21907400 |
| 3L | 14584718 | 14585016 | ../05_Mac | 33.52095 | 14584846 |
| 3L | 5022279  | 5022712  | ../05_Mac | 33.4915  | 5022426  |
| 3L | 24910475 | 24911130 | ../05_Mac | 33.4915  | 24911000 |



|          |          |          |           |          |          |
|----------|----------|----------|-----------|----------|----------|
| 3R       | 18310978 | 18311217 | ../05_Mac | 28.14723 | 18311097 |
| 2R       | 9887409  | 9887781  | ../05_Mac | 28.14134 | 9887593  |
| 3L       | 2212297  | 2212675  | ../05_Mac | 28.10481 | 2212472  |
| 3L       | 3694024  | 3694449  | ../05_Mac | 28.0974  | 3694264  |
| 2L       | 12085090 | 12085609 | ../05_Mac | 28.04791 | 12085376 |
| 2.11E+14 | 693      | 1132     | ../05_Mac | 28.03965 | 903      |
| 3R       | 11630945 | 11631486 | ../05_Mac | 28.03965 | 11631112 |
| 2L       | 10040399 | 10040998 | ../05_Mac | 27.95278 | 10040599 |
| 2R       | 15395155 | 15395625 | ../05_Mac | 27.95278 | 15395465 |
| 3R       | 13605115 | 13605481 | ../05_Mac | 27.90376 | 13605300 |
| 2L       | 21883466 | 21883858 | ../05_Mac | 27.8932  | 21883697 |
| 2L       | 13779660 | 13780018 | ../05_Mac | 27.89024 | 13779868 |
| 3R       | 9021858  | 9022208  | ../05_Mac | 27.85939 | 9022037  |
| X        | 2073379  | 2073765  | ../05_Mac | 27.83917 | 2073562  |
| 3R       | 9939419  | 9939753  | ../05_Mac | 27.80477 | 9939608  |
| 3R       | 11399557 | 11399890 | ../05_Mac | 27.77632 | 11399721 |
| 2L       | 11121598 | 11121908 | ../05_Mac | 27.76225 | 11121740 |
| 3R       | 22715424 | 22715813 | ../05_Mac | 27.75601 | 22715610 |
| X        | 19521693 | 19522263 | ../05_Mac | 27.65299 | 19522009 |
| 2L       | 14661293 | 14661744 | ../05_Mac | 27.61287 | 14661562 |
| 3R       | 7376865  | 7377414  | ../05_Mac | 27.5381  | 7377199  |
| 3L       | 12949849 | 12950210 | ../05_Mac | 27.52927 | 12950012 |
| 3R       | 27291617 | 27292066 | ../05_Mac | 27.50456 | 27291808 |
| 2R       | 19514555 | 19515255 | ../05_Mac | 27.48585 | 19514779 |
| 2L       | 18026468 | 18026794 | ../05_Mac | 27.45902 | 18026603 |
| 2R       | 12125628 | 12126030 | ../05_Mac | 27.45902 | 12125819 |
| 2R       | 21954640 | 21955095 | ../05_Mac | 27.45902 | 21954870 |
| 3L       | 7047774  | 7048091  | ../05_Mac | 27.45902 | 7047929  |
| 3R       | 16718223 | 16718897 | ../05_Mac | 27.45902 | 16718550 |
| X        | 1340549  | 1340931  | ../05_Mac | 27.45902 | 1340705  |
| 2R       | 14375678 | 14376021 | ../05_Mac | 27.43943 | 14375822 |
| 2R       | 12139900 | 12140282 | ../05_Mac | 27.4298  | 12140077 |
| 3L       | 3170033  | 3170329  | ../05_Mac | 27.34391 | 3170174  |
| 3R       | 12657485 | 12658206 | ../05_Mac | 27.25601 | 12657682 |
| 2R       | 20085527 | 20085915 | ../05_Mac | 27.25377 | 20085671 |
| 2.11E+14 | 9883     | 11613    | ../05_Mac | 27.18825 | 10794    |
| 3R       | 18360806 | 18361162 | ../05_Mac | 27.18478 | 18360983 |
| 3L       | 3718359  | 3719184  | ../05_Mac | 27.08615 | 3719007  |
| 3L       | 21406584 | 21406900 | ../05_Mac | 27.0486  | 21406738 |
| 2L       | 10168812 | 10169203 | ../05_Mac | 27.0306  | 10169018 |
| 3R       | 12555226 | 12555581 | ../05_Mac | 27.0306  | 12555412 |
| 3R       | 26322061 | 26322483 | ../05_Mac | 27.00048 | 26322290 |
| 2R       | 6838814  | 6839393  | ../05_Mac | 26.96818 | 6838968  |
| 3L       | 8863555  | 8864017  | ../05_Mac | 26.96818 | 8863797  |
| 3L       | 27863716 | 27864372 | ../05_Mac | 26.96787 | 27864065 |
| 3R       | 8599202  | 8599587  | ../05_Mac | 26.96787 | 8599390  |
| 3R       | 16571325 | 16571703 | ../05_Mac | 26.96787 | 16571484 |
| 3R       | 27813507 | 27813844 | ../05_Mac | 26.96787 | 27813687 |
| 3L       | 13618411 | 13618851 | ../05_Mac | 26.88547 | 13618649 |

|    |          |          |           |          |          |
|----|----------|----------|-----------|----------|----------|
| 2R | 7877916  | 7878428  | ../05_Mac | 33.46062 | 7878217  |
| 3L | 18261749 | 18262066 | ../05_Mac | 33.46062 | 18261920 |
| 3L | 20866860 | 20867738 | ../05_Mac | 33.44948 | 20867477 |
| 2L | 11684318 | 11684803 | ../05_Mac | 33.43888 | 11684474 |
| 3R | 26081009 | 26081433 | ../05_Mac | 33.42889 | 26081252 |
| 2R | 12103922 | 12104562 | ../05_Mac | 33.40967 | 12104335 |
| 2L | 19384165 | 19384812 | ../05_Mac | 33.38389 | 19384439 |
| 2L | 4260283  | 4261106  | ../05_Mac | 33.36532 | 4260865  |
| 3R | 19674656 | 19674992 | ../05_Mac | 33.36115 | 19674820 |
| 2R | 22091793 | 22092165 | ../05_Mac | 33.35788 | 22091966 |
| 3L | 1484904  | 1485227  | ../05_Mac | 33.35788 | 1485074  |
| 2R | 20774280 | 20774652 | ../05_Mac | 33.3533  | 20774457 |
| 2R | 23216834 | 23217231 | ../05_Mac | 33.35198 | 23217052 |
| 3L | 13166754 | 13167163 | ../05_Mac | 33.35198 | 13166979 |
| 2R | 14435952 | 14436649 | ../05_Mac | 33.35164 | 14436455 |
| 3R | 5437590  | 5438043  | ../05_Mac | 33.29429 | 5437782  |
| 2R | 6151025  | 6151690  | ../05_Mac | 33.27373 | 6151260  |
| 3L | 21755378 | 21756046 | ../05_Mac | 33.23662 | 21755830 |
| 3L | 4299413  | 4299793  | ../05_Mac | 33.14555 | 4299563  |
| 3L | 18919236 | 18919580 | ../05_Mac | 33.1386  | 18919412 |
| 2R | 11695279 | 11696366 | ../05_Mac | 33.11481 | 11695971 |
| 3R | 8890972  | 8891404  | ../05_Mac | 33.10614 | 8891162  |
| 3L | 15469108 | 15469666 | ../05_Mac | 33.08609 | 15469293 |
| 2R | 13078672 | 13079024 | ../05_Mac | 33.0401  | 13078861 |
| 2R | 22366746 | 22367393 | ../05_Mac | 33.0401  | 22366951 |
| 3L | 12980192 | 12980693 | ../05_Mac | 33.0401  | 12980508 |
| 3L | 21859500 | 21859812 | ../05_Mac | 33.0401  | 21859680 |
| X  | 5346878  | 5347429  | ../05_Mac | 33.0401  | 5347105  |
| X  | 6831788  | 6832456  | ../05_Mac | 33.0401  | 6832270  |
| X  | 15376712 | 15377102 | ../05_Mac | 33.0401  | 15376915 |
| 3L | 4059858  | 4060244  | ../05_Mac | 33.02581 | 4060048  |
| 3R | 28671661 | 28672063 | ../05_Mac | 33.02581 | 28671896 |
| 3R | 17180700 | 17181410 | ../05_Mac | 33.01471 | 17180900 |
| 3R | 25639546 | 25639923 | ../05_Mac | 33.01303 | 25639705 |
| 3R | 6200240  | 6200766  | ../05_Mac | 32.99419 | 6200437  |
| 2L | 11483197 | 11483687 | ../05_Mac | 32.98478 | 11483433 |
| 3L | 1139516  | 1140195  | ../05_Mac | 32.97598 | 1140019  |
| 2L | 12322882 | 12323326 | ../05_Mac | 32.95322 | 12323120 |
| 2R | 15496530 | 15496976 | ../05_Mac | 32.95322 | 15496803 |
| 3R | 17263525 | 17263961 | ../05_Mac | 32.94671 | 17263734 |
| 3R | 26992324 | 26992934 | ../05_Mac | 32.94671 | 26992608 |
| 2R | 12409445 | 12409750 | ../05_Mac | 32.94096 | 12409597 |
| 3L | 19424545 | 19424955 | ../05_Mac | 32.93587 | 19424757 |
| X  | 17102960 | 17103316 | ../05_Mac | 32.93005 | 17103127 |
| 2L | 17549771 | 17550391 | ../05_Mac | 32.92455 | 17550009 |
| 3L | 23082123 | 23082445 | ../05_Mac | 32.92209 | 23082309 |
| 2R | 5860938  | 5861316  | ../05_Mac | 32.91964 | 5861139  |
| 2R | 24825572 | 24825923 | ../05_Mac | 32.9007  | 24825773 |
| 3R | 24372440 | 24372891 | ../05_Mac | 32.89131 | 24372602 |

|          |          |          |           |          |          |
|----------|----------|----------|-----------|----------|----------|
| 3R       | 7884117  | 7884563  | ../05_Mac | 26.80817 | 7884381  |
| 2L       | 14448886 | 14449251 | ../05_Mac | 26.79665 | 14449084 |
| 2L       | 21957667 | 21958118 | ../05_Mac | 26.77976 | 21957876 |
| 3L       | 9402248  | 9402683  | ../05_Mac | 26.75236 | 9402444  |
| 3L       | 7544538  | 7545060  | ../05_Mac | 26.73385 | 7544690  |
| 3R       | 10941379 | 10941831 | ../05_Mac | 26.62478 | 10941609 |
| 2R       | 9098541  | 9099019  | ../05_Mac | 26.60064 | 9098759  |
| 3L       | 19355941 | 19356357 | ../05_Mac | 26.58312 | 19356087 |
| X        | 11367751 | 11368075 | ../05_Mac | 26.57518 | 11367929 |
| 2L       | 11648671 | 11649388 | ../05_Mac | 26.56002 | 11648867 |
| 2L       | 1999783  | 2000223  | ../05_Mac | 26.54364 | 2000020  |
| 3R       | 6472438  | 6472772  | ../05_Mac | 26.51238 | 6472587  |
| 2.11E+14 | 1286     | 1555     | ../05_Mac | 26.47992 | 1358     |
| 2L       | 6109085  | 6109598  | ../05_Mac | 26.47992 | 6109280  |
| 2R       | 12052806 | 12053105 | ../05_Mac | 26.47992 | 12052923 |
| 2R       | 13722604 | 13722952 | ../05_Mac | 26.47992 | 13722762 |
| 2R       | 18256475 | 18256798 | ../05_Mac | 26.47992 | 18256637 |
| 2L       | 16202873 | 16203355 | ../05_Mac | 26.45678 | 16203062 |
| 2L       | 14356837 | 14357248 | ../05_Mac | 26.32582 | 14357013 |
| 3R       | 24553697 | 24554482 | ../05_Mac | 26.26375 | 24554186 |
| 2L       | 1355722  | 1356136  | ../05_Mac | 26.26372 | 1355959  |
| 3R       | 4343361  | 4344598  | ../05_Mac | 26.21552 | 4344145  |
| 2L       | 16560245 | 16560642 | ../05_Mac | 26.16852 | 16560446 |
| 2R       | 19048577 | 19048992 | ../05_Mac | 26.14657 | 19048825 |
| 3L       | 13218650 | 13219072 | ../05_Mac | 26.05579 | 13218883 |
| 2R       | 24891936 | 24892279 | ../05_Mac | 26.04052 | 24892099 |
| 3R       | 29270048 | 29270431 | ../05_Mac | 26.04052 | 29270222 |
| 3L       | 22917139 | 22917505 | ../05_Mac | 26.00657 | 22917314 |
| 3L       | 14693016 | 14694091 | ../05_Mac | 25.9949  | 14693211 |
| 3L       | 22498122 | 22498962 | ../05_Mac | 25.9949  | 22498763 |
| 3L       | 23934973 | 23935506 | ../05_Mac | 25.9949  | 23935250 |
| 2L       | 6948694  | 6948938  | ../05_Mac | 25.95539 | 6948825  |
| 3R       | 12627732 | 12628083 | ../05_Mac | 25.9065  | 12627888 |
| 3R       | 21356778 | 21357107 | ../05_Mac | 25.82007 | 21356925 |
| 2R       | 6012832  | 6013528  | ../05_Mac | 25.7774  | 6013356  |
| 3L       | 3127430  | 3127829  | ../05_Mac | 25.77569 | 3127611  |
| 2L       | 14006892 | 14007171 | ../05_Mac | 25.73549 | 14007045 |
| 2R       | 22842336 | 22842887 | ../05_Mac | 25.72581 | 22842493 |
| 2R       | 18246416 | 18247021 | ../05_Mac | 25.66639 | 18246823 |
| 2L       | 9675901  | 9676206  | ../05_Mac | 25.58844 | 9676036  |
| 3R       | 12512623 | 12512996 | ../05_Mac | 25.5706  | 12512811 |
| 3R       | 5829241  | 5829580  | ../05_Mac | 25.56163 | 5829398  |
| 2R       | 8003556  | 8004044  | ../05_Mac | 25.53724 | 8003879  |
| 2L       | 5637728  | 5638160  | ../05_Mac | 25.51234 | 5637968  |
| 2L       | 8893046  | 8893355  | ../05_Mac | 25.51234 | 8893211  |
| 2L       | 13951710 | 13952143 | ../05_Mac | 25.51234 | 13951949 |
| 2R       | 10314788 | 10315183 | ../05_Mac | 25.51234 | 10315019 |
| 2R       | 22756717 | 22757004 | ../05_Mac | 25.51234 | 22756868 |
| 2R       | 23341564 | 23342027 | ../05_Mac | 25.51234 | 23341798 |

|    |          |          |           |          |          |
|----|----------|----------|-----------|----------|----------|
| 3L | 14333012 | 14333591 | ../05_Mac | 32.89042 | 14333232 |
| 3L | 10560197 | 10560533 | ../05_Mac | 32.8814  | 10560344 |
| 2L | 4121999  | 4122372  | ../05_Mac | 32.83628 | 4122140  |
| 2L | 12081956 | 12082330 | ../05_Mac | 32.81348 | 12082150 |
| 2R | 17279380 | 17279801 | ../05_Mac | 32.81348 | 17279595 |
| 2L | 11883264 | 11883722 | ../05_Mac | 32.77732 | 11883513 |
| 2L | 18502839 | 18503260 | ../05_Mac | 32.67979 | 18503079 |
| 3R | 5858342  | 5858715  | ../05_Mac | 32.66515 | 5858523  |
| 2L | 23014453 | 23015010 | ../05_Mac | 32.65845 | 23014821 |
| 2R | 12292209 | 12292492 | ../05_Mac | 32.65509 | 12292351 |
| 3R | 10837047 | 10837383 | ../05_Mac | 32.61153 | 10837220 |
| 3L | 5101222  | 5101625  | ../05_Mac | 32.59102 | 5101449  |
| 3R | 5922660  | 5923238  | ../05_Mac | 32.59102 | 5922851  |
| 3R | 11510673 | 11511018 | ../05_Mac | 32.59102 | 11510849 |
| 3R | 27405195 | 27405592 | ../05_Mac | 32.59102 | 27405429 |
| 3R | 28081845 | 28082246 | ../05_Mac | 32.59102 | 28082057 |
| 3R | 28559631 | 28560030 | ../05_Mac | 32.59102 | 28559821 |
| X  | 18219420 | 18220250 | ../05_Mac | 32.59102 | 18219678 |
| 3R | 12749135 | 12749644 | ../05_Mac | 32.55949 | 12749429 |
| 2L | 17345274 | 17345730 | ../05_Mac | 32.51241 | 17345600 |
| 3L | 22676531 | 22676897 | ../05_Mac | 32.50678 | 22676719 |
| 3R | 11474211 | 11474633 | ../05_Mac | 32.49872 | 11474433 |
| 3L | 14456859 | 14457290 | ../05_Mac | 32.49497 | 14457087 |
| 2L | 5595804  | 5596166  | ../05_Mac | 32.49462 | 5596000  |
| 2R | 8850278  | 8850968  | ../05_Mac | 32.49391 | 8850775  |
| 3L | 14720086 | 14720467 | ../05_Mac | 32.4913  | 14720256 |
| 3R | 7166797  | 7167137  | ../05_Mac | 32.48874 | 7166984  |
| 3R | 12342917 | 12343520 | ../05_Mac | 32.48862 | 12343096 |
| 2R | 22367839 | 22368361 | ../05_Mac | 32.48703 | 22367966 |
| 3L | 13078127 | 13078404 | ../05_Mac | 32.48703 | 13078269 |
| 2R | 8309435  | 8310218  | ../05_Mac | 32.48618 | 8309748  |
| 3L | 2293592  | 2293968  | ../05_Mac | 32.48618 | 2293775  |
| 3R | 12117258 | 12117798 | ../05_Mac | 32.48618 | 12117499 |
| 3L | 5593732  | 5594230  | ../05_Mac | 32.41589 | 5594043  |
| X  | 21156360 | 21157047 | ../05_Mac | 32.41589 | 21156624 |
| 3L | 10318660 | 10319049 | ../05_Mac | 32.39686 | 10318804 |
| 3R | 26495859 | 26496218 | ../05_Mac | 32.39686 | 26496046 |
| 2R | 21896547 | 21896904 | ../05_Mac | 32.34191 | 21896725 |
| 3R | 23880604 | 23880943 | ../05_Mac | 32.34168 | 23880788 |
| 3R | 7832443  | 7832830  | ../05_Mac | 32.22979 | 7832593  |
| 2L | 19840066 | 19840593 | ../05_Mac | 32.21566 | 19840274 |
| 2R | 20009298 | 20009932 | ../05_Mac | 32.21564 | 20009742 |
| 2L | 19876805 | 19877262 | ../05_Mac | 32.18493 | 19877049 |
| 3L | 18135055 | 18135631 | ../05_Mac | 32.15273 | 18135331 |
| 3R | 27084226 | 27084888 | ../05_Mac | 32.15273 | 27084418 |
| 2R | 8816148  | 8816486  | ../05_Mac | 32.14408 | 8816314  |
| 2R | 21882819 | 21883914 | ../05_Mac | 32.14408 | 21883029 |
| 3L | 1012969  | 1013535  | ../05_Mac | 32.14408 | 1013291  |
| 3R | 27220173 | 27220636 | ../05_Mac | 32.14408 | 27220340 |

|    |          |          |           |          |          |
|----|----------|----------|-----------|----------|----------|
| 3L | 950674   | 951086   | ../05_Mac | 25.51234 | 950854   |
| 3L | 15300397 | 15300805 | ../05_Mac | 25.51234 | 15300580 |
| 3R | 8087095  | 8087653  | ../05_Mac | 25.51234 | 8087333  |
| 3R | 11310464 | 11310862 | ../05_Mac | 25.51234 | 11310637 |
| X  | 14061405 | 14061693 | ../05_Mac | 25.51234 | 14061504 |
| 3R | 26356002 | 26356328 | ../05_Mac | 25.45087 | 26356145 |
| 3L | 15981940 | 15982255 | ../05_Mac | 25.43954 | 15982078 |
| 3R | 8228833  | 8229270  | ../05_Mac | 25.36357 | 8229010  |
| 3R | 29068678 | 29069090 | ../05_Mac | 25.34674 | 29068893 |
| 2R | 11818035 | 11818792 | ../05_Mac | 25.32543 | 11818548 |
| 2R | 22985146 | 22985489 | ../05_Mac | 25.31686 | 22985297 |
| 4  | 291856   | 292280   | ../05_Mac | 25.26678 | 291992   |
| 3R | 23803738 | 23804122 | ../05_Mac | 25.23672 | 23803929 |
| 3L | 6022398  | 6022799  | ../05_Mac | 25.22342 | 6022591  |
| 3L | 21162781 | 21163263 | ../05_Mac | 25.18155 | 21163069 |
| 3L | 7450698  | 7451140  | ../05_Mac | 25.14882 | 7450947  |
| 3R | 24912797 | 24913153 | ../05_Mac | 25.14469 | 24912926 |
| 2L | 21785035 | 21785458 | ../05_Mac | 25.13259 | 21785188 |
| 2R | 21818908 | 21819448 | ../05_Mac | 25.13259 | 21819189 |
| 2L | 9700167  | 9700613  | ../05_Mac | 25.09714 | 9700353  |
| 2L | 14290381 | 14290871 | ../05_Mac | 25.06598 | 14290553 |
| 3R | 13229235 | 13229787 | ../05_Mac | 25.05718 | 13229494 |
| 3R | 6864283  | 6864666  | ../05_Mac | 25.03319 | 6864491  |
| X  | 4276912  | 4277234  | ../05_Mac | 25.03319 | 4277064  |
| 3L | 18988290 | 18988586 | ../05_Mac | 25.02578 | 18988420 |
| X  | 6346902  | 6347632  | ../05_Mac | 24.98321 | 6347445  |
| 3R | 9709462  | 9710052  | ../05_Mac | 24.85798 | 9709726  |
| 3R | 18010791 | 18011107 | ../05_Mac | 24.81277 | 18010946 |
| 2L | 6267247  | 6267774  | ../05_Mac | 24.79842 | 6267439  |
| 2L | 1092799  | 1093125  | ../05_Mac | 24.76317 | 1092958  |
| 3L | 19576675 | 19577424 | ../05_Mac | 24.75965 | 19577033 |
| 3L | 250847   | 251204   | ../05_Mac | 24.71003 | 251031   |
| 2L | 9119386  | 9119962  | ../05_Mac | 24.66629 | 9119590  |
| 2L | 15073179 | 15073653 | ../05_Mac | 24.61006 | 15073370 |
| 3L | 16703542 | 16703956 | ../05_Mac | 24.58418 | 16703703 |
| X  | 19651860 | 19652442 | ../05_Mac | 24.56253 | 19652034 |
| 2L | 4000775  | 4001258  | ../05_Mac | 24.55686 | 4000957  |
| 2L | 5932405  | 5932798  | ../05_Mac | 24.55686 | 5932602  |
| 3L | 15318239 | 15318557 | ../05_Mac | 24.55686 | 15318398 |
| 3R | 10460830 | 10461304 | ../05_Mac | 24.55686 | 10461022 |
| X  | 21570219 | 21570757 | ../05_Mac | 24.55686 | 21570382 |
| 2L | 21335662 | 21336412 | ../05_Mac | 24.52785 | 21336258 |
| 2L | 4657829  | 4658865  | ../05_Mac | 24.43345 | 4658681  |
| 2R | 17437650 | 17437933 | ../05_Mac | 24.42249 | 17437797 |
| 2R | 23351391 | 23351703 | ../05_Mac | 24.4006  | 23351535 |
| 2R | 17571781 | 17572246 | ../05_Mac | 24.38012 | 17572004 |
| 2R | 13711140 | 13711467 | ../05_Mac | 24.33286 | 13711295 |
| 2L | 13049219 | 13049711 | ../05_Mac | 24.30307 | 13049474 |
| 2L | 10137438 | 10137862 | ../05_Mac | 24.26197 | 10137669 |

|    |          |          |           |          |          |
|----|----------|----------|-----------|----------|----------|
| 3R | 9933836  | 9934313  | ../05_Mac | 32.12917 | 9934116  |
| 2L | 21196731 | 21197105 | ../05_Mac | 32.12438 | 21196920 |
| 3L | 3551622  | 3552079  | ../05_Mac | 32.10991 | 3551887  |
| 2L | 17694860 | 17695223 | ../05_Mac | 32.08626 | 17695032 |
| 2R | 11537307 | 11537718 | ../05_Mac | 32.08396 | 11537554 |
| 2L | 4052485  | 4052978  | ../05_Mac | 32.07789 | 4052674  |
| 3R | 27389474 | 27389951 | ../05_Mac | 32.07789 | 27389697 |
| 3R | 24430239 | 24430681 | ../05_Mac | 32.06324 | 24430517 |
| 2R | 21747396 | 21747699 | ../05_Mac | 32.06301 | 21747516 |
| 3L | 2675916  | 2676270  | ../05_Mac | 32.06301 | 2676103  |
| 2L | 12781346 | 12781799 | ../05_Mac | 32.06011 | 12781571 |
| 2R | 11971789 | 11972633 | ../05_Mac | 32.06011 | 11971971 |
| 3L | 16311464 | 16311783 | ../05_Mac | 32.05942 | 16311654 |
| 3L | 17111166 | 17111701 | ../05_Mac | 32.05704 | 17111432 |
| 3L | 5988307  | 5988719  | ../05_Mac | 32.05344 | 5988530  |
| 2R | 20008124 | 20008458 | ../05_Mac | 32.00957 | 20008277 |
| 2R | 10243675 | 10244007 | ../05_Mac | 32.00213 | 10243827 |
| 2R | 19065697 | 19066113 | ../05_Mac | 31.93416 | 19065917 |
| 3L | 1189031  | 1189530  | ../05_Mac | 31.92218 | 1189289  |
| 2R | 16917564 | 16918080 | ../05_Mac | 31.9066  | 16917897 |
| 2L | 14295364 | 14296322 | ../05_Mac | 31.8968  | 14296135 |
| 2R | 23426531 | 23426918 | ../05_Mac | 31.8968  | 23426706 |
| 3R | 8218954  | 8219296  | ../05_Mac | 31.88922 | 8219121  |
| 3R | 3795111  | 3795491  | ../05_Mac | 31.85574 | 3795308  |
| 3L | 2717105  | 2717725  | ../05_Mac | 31.82406 | 2717430  |
| 2L | 3147960  | 3148433  | ../05_Mac | 31.823   | 3148207  |
| 3L | 22054313 | 22054710 | ../05_Mac | 31.7995  | 22054511 |
| 3L | 22309636 | 22310644 | ../05_Mac | 31.7804  | 22310453 |
| 3R | 9798445  | 9798961  | ../05_Mac | 31.77094 | 9798687  |
| 2R | 15200007 | 15200493 | ../05_Mac | 31.75286 | 15200225 |
| 3R | 17378645 | 17379654 | ../05_Mac | 31.75256 | 17378841 |
| 3R | 16276860 | 16277238 | ../05_Mac | 31.74636 | 16277069 |
| 3R | 6966587  | 6967186  | ../05_Mac | 31.74106 | 6966815  |
| 2L | 1675832  | 1676674  | ../05_Mac | 31.7175  | 1676128  |
| 3L | 5675867  | 5676187  | ../05_Mac | 31.7175  | 5676029  |
| 3L | 22250912 | 22251263 | ../05_Mac | 31.7175  | 22251058 |
| 3L | 2796072  | 2796487  | ../05_Mac | 31.7066  | 2796242  |
| 3R | 12838244 | 12838964 | ../05_Mac | 31.7066  | 12838732 |
| 2L | 2608897  | 2609224  | ../05_Mac | 31.69934 | 2609095  |
| 2L | 16441885 | 16442388 | ../05_Mac | 31.69934 | 16442091 |
| 2L | 17272921 | 17273209 | ../05_Mac | 31.69934 | 17273065 |
| 2R | 4725506  | 4726004  | ../05_Mac | 31.69934 | 4725802  |
| 2R | 5857991  | 5858339  | ../05_Mac | 31.69934 | 5858153  |
| 2L | 14060206 | 14060705 | ../05_Mac | 31.6896  | 14060412 |
| 2L | 11961345 | 11962027 | ../05_Mac | 31.68843 | 11961541 |
| 3R | 10576282 | 10577085 | ../05_Mac | 31.68036 | 10576451 |
| 3L | 18161561 | 18161898 | ../05_Mac | 31.65634 | 18161731 |
| 3R | 7740979  | 7741319  | ../05_Mac | 31.65634 | 7741132  |
| 3R | 17031976 | 17032386 | ../05_Mac | 31.64558 | 17032146 |

|          |          |          |           |          |          |
|----------|----------|----------|-----------|----------|----------|
| 3L       | 15322082 | 15322495 | ../05_Mac | 24.23333 | 15322277 |
| 3L       | 19176639 | 19177154 | ../05_Mac | 24.23141 | 19176963 |
| 2R       | 9705311  | 9705806  | ../05_Mac | 24.19154 | 9705512  |
| 2L       | 7196148  | 7196519  | ../05_Mac | 24.17575 | 7196361  |
| 3R       | 8198923  | 8199246  | ../05_Mac | 24.1587  | 8199104  |
| 2L       | 13304055 | 13304873 | ../05_Mac | 24.13686 | 13304658 |
| 3L       | 6323732  | 6324040  | ../05_Mac | 24.1276  | 6323913  |
| 3R       | 31718154 | 31718759 | ../05_Mac | 24.11611 | 31718618 |
| 2R       | 21258684 | 21259055 | ../05_Mac | 24.08362 | 21258867 |
| 2R       | 23828773 | 23829060 | ../05_Mac | 24.08362 | 23828915 |
| 3R       | 8594512  | 8594953  | ../05_Mac | 24.08362 | 8594728  |
| 3R       | 27336812 | 27337122 | ../05_Mac | 24.08362 | 27336948 |
| 3R       | 27369508 | 27370162 | ../05_Mac | 24.08362 | 27369969 |
| 3R       | 28064436 | 28064789 | ../05_Mac | 24.08362 | 28064632 |
| X        | 3273084  | 3273606  | ../05_Mac | 24.08362 | 3273266  |
| X        | 6248666  | 6249006  | ../05_Mac | 24.08362 | 6248848  |
| 2R       | 10720614 | 10721089 | ../05_Mac | 24.07468 | 10720861 |
| 3R       | 12344226 | 12345288 | ../05_Mac | 24.07022 | 12345016 |
| 3R       | 8213912  | 8214390  | ../05_Mac | 24.00844 | 8214168  |
| 2L       | 4553016  | 4553312  | ../05_Mac | 23.98848 | 4553171  |
| 2L       | 6060902  | 6061232  | ../05_Mac | 23.97883 | 6061078  |
| 3L       | 19970341 | 19970623 | ../05_Mac | 23.93208 | 19970499 |
| 3R       | 23814981 | 23815314 | ../05_Mac | 23.9239  | 23815133 |
| 3R       | 12961526 | 12961896 | ../05_Mac | 23.85998 | 12961715 |
| 3R       | 25252385 | 25252837 | ../05_Mac | 23.82796 | 25252666 |
| 3R       | 6562235  | 6562848  | ../05_Mac | 23.79162 | 6562692  |
| 2L       | 19841739 | 19842373 | ../05_Mac | 23.78003 | 19842087 |
| 2R       | 8969939  | 8970253  | ../05_Mac | 23.78003 | 8970106  |
| 3R       | 29720951 | 29721286 | ../05_Mac | 23.76027 | 29721130 |
| 3L       | 10910370 | 10910721 | ../05_Mac | 23.74785 | 10910539 |
| 3R       | 18109226 | 18109615 | ../05_Mac | 23.72271 | 18109434 |
| 2L       | 19535288 | 19535611 | ../05_Mac | 23.68269 | 19535436 |
| 2R       | 18123107 | 18123403 | ../05_Mac | 23.67249 | 18123262 |
| 2L       | 5046328  | 5046701  | ../05_Mac | 23.65759 | 5046534  |
| 3L       | 22970190 | 22970606 | ../05_Mac | 23.65568 | 22970451 |
| 3L       | 14303053 | 14303373 | ../05_Mac | 23.65142 | 14303217 |
| 2R       | 18048912 | 18049192 | ../05_Mac | 23.61413 | 18049069 |
| 3L       | 9915655  | 9916078  | ../05_Mac | 23.61413 | 9915813  |
| 3R       | 31507835 | 31508231 | ../05_Mac | 23.61413 | 31508053 |
| 3R       | 31742078 | 31742432 | ../05_Mac | 23.47223 | 31742277 |
| 3L       | 8888230  | 8888802  | ../05_Mac | 23.3887  | 8888641  |
| X        | 2791745  | 2793180  | ../05_Mac | 23.31513 | 2792489  |
| 3R       | 24900915 | 24901280 | ../05_Mac | 23.31473 | 24901091 |
| 2.11E+14 | 608      | 1128     | ../05_Mac | 23.29433 | 1005     |
| 2L       | 227744   | 228064   | ../05_Mac | 23.28908 | 227904   |
| 2L       | 1758947  | 1759277  | ../05_Mac | 23.27106 | 1759124  |
| X        | 1322311  | 1322876  | ../05_Mac | 23.26565 | 1322484  |
| 3R       | 31174276 | 31174588 | ../05_Mac | 23.25727 | 31174452 |
| 2R       | 14153231 | 14153567 | ../05_Mac | 23.23263 | 14153421 |

|    |          |          |           |          |          |
|----|----------|----------|-----------|----------|----------|
| 2R | 23329022 | 23329462 | ../05_Mac | 31.63658 | 23329279 |
| 2R | 12288370 | 12289063 | ../05_Mac | 31.63166 | 12288901 |
| 3R | 16398789 | 16399119 | ../05_Mac | 31.62944 | 16398959 |
| 2R | 24460560 | 24461039 | ../05_Mac | 31.62773 | 24460822 |
| 3L | 22920189 | 22920623 | ../05_Mac | 31.62773 | 22920486 |
| 2L | 1788040  | 1788557  | ../05_Mac | 31.62466 | 1788385  |
| 2R | 18027070 | 18027445 | ../05_Mac | 31.62073 | 18027266 |
| 2L | 4786086  | 4786587  | ../05_Mac | 31.6204  | 4786409  |
| 3R | 14744204 | 14744900 | ../05_Mac | 31.56186 | 14744341 |
| 3R | 13396807 | 13397167 | ../05_Mac | 31.54582 | 13396981 |
| 3R | 23486194 | 23486680 | ../05_Mac | 31.53413 | 23486403 |
| 3R | 30525029 | 30525683 | ../05_Mac | 31.52674 | 30525398 |
| 3R | 14452569 | 14453431 | ../05_Mac | 31.51912 | 14452741 |
| 2L | 16801142 | 16801594 | ../05_Mac | 31.45415 | 16801409 |
| 3L | 11529038 | 11529361 | ../05_Mac | 31.44549 | 11529224 |
| 2L | 11179362 | 11179759 | ../05_Mac | 31.43915 | 11179560 |
| 3L | 20980853 | 20981255 | ../05_Mac | 31.41378 | 20981049 |
| 2L | 3284574  | 3285080  | ../05_Mac | 31.37991 | 3284745  |
| 3L | 6435408  | 6435787  | ../05_Mac | 31.35938 | 6435592  |
| 2L | 790381   | 790875   | ../05_Mac | 31.34531 | 790677   |
| 3L | 2627654  | 2628175  | ../05_Mac | 31.32623 | 2627970  |
| 2L | 20693779 | 20694145 | ../05_Mac | 31.31853 | 20693941 |
| 3L | 21647618 | 21648005 | ../05_Mac | 31.31853 | 21647809 |
| 2L | 11940709 | 11941319 | ../05_Mac | 31.30602 | 11941120 |
| 3R | 6978330  | 6978696  | ../05_Mac | 31.29401 | 6978481  |
| 2R | 12400307 | 12400662 | ../05_Mac | 31.28692 | 12400470 |
| 2L | 15065746 | 15066211 | ../05_Mac | 31.27312 | 15065961 |
| 3L | 12560193 | 12560765 | ../05_Mac | 31.27312 | 12560399 |
| 2R | 10966542 | 10966887 | ../05_Mac | 31.27188 | 10966719 |
| 2R | 9377982  | 9378349  | ../05_Mac | 31.2616  | 9378151  |
| 3R | 7550191  | 7551279  | ../05_Mac | 31.2616  | 7550842  |
| 2L | 4693850  | 4694421  | ../05_Mac | 31.25713 | 4694088  |
| 3L | 23397520 | 23397873 | ../05_Mac | 31.25713 | 23397693 |
| 3R | 28076659 | 28077562 | ../05_Mac | 31.25713 | 28076831 |
| X  | 534466   | 534824   | ../05_Mac | 31.25713 | 534651   |
| X  | 18051730 | 18052373 | ../05_Mac | 31.25713 | 18051961 |
| 2L | 2088982  | 2089322  | ../05_Mac | 31.23726 | 2089178  |
| 3R | 16531563 | 16531930 | ../05_Mac | 31.23726 | 16531736 |
| 3L | 16284760 | 16285261 | ../05_Mac | 31.21541 | 16284944 |
| 2L | 4328971  | 4329320  | ../05_Mac | 31.21335 | 4329139  |
| 2L | 19838274 | 19839523 | ../05_Mac | 31.20949 | 19838794 |
| 2R | 20801318 | 20801933 | ../05_Mac | 31.20414 | 20801661 |
| 2L | 1541180  | 1541599  | ../05_Mac | 31.1996  | 1541359  |
| 2L | 15490256 | 15490769 | ../05_Mac | 31.1996  | 15490416 |
| 3L | 13887179 | 13887603 | ../05_Mac | 31.1996  | 13887363 |
| 2R | 20888780 | 20889144 | ../05_Mac | 31.19625 | 20888958 |
| 2L | 967449   | 967897   | ../05_Mac | 31.19574 | 967687   |
| 3R | 23502815 | 23503484 | ../05_Mac | 31.1928  | 23503140 |
| X  | 12737559 | 12737905 | ../05_Mac | 31.19031 | 12737726 |

|          |          |          |           |          |          |
|----------|----------|----------|-----------|----------|----------|
| 2R       | 15728941 | 15729501 | ../05_Mac | 23.18289 | 15729240 |
| 2L       | 4618502  | 4618811  | ../05_Mac | 23.14792 | 4618641  |
| 2L       | 12757998 | 12758381 | ../05_Mac | 23.14792 | 12758202 |
| 2R       | 16357485 | 16357901 | ../05_Mac | 23.14792 | 16357664 |
| 3R       | 22662047 | 22662554 | ../05_Mac | 23.14792 | 22662382 |
| 3R       | 27848090 | 27848406 | ../05_Mac | 23.14792 | 27848259 |
| X        | 15055244 | 15055550 | ../05_Mac | 23.14792 | 15055401 |
| 3R       | 5807608  | 5807933  | ../05_Mac | 23.14428 | 5807747  |
| Y        | 854491   | 854733   | ../05_Mac | 23.13386 | 854653   |
| 2R       | 13663364 | 13663742 | ../05_Mac | 23.12646 | 13663585 |
| 2R       | 14563364 | 14563892 | ../05_Mac | 23.11805 | 14563524 |
| 3L       | 3692076  | 3692455  | ../05_Mac | 23.1068  | 3692258  |
| 2R       | 6668860  | 6669301  | ../05_Mac | 23.06167 | 6669168  |
| 3R       | 16146563 | 16147011 | ../05_Mac | 23.04312 | 16146718 |
| 3L       | 22174473 | 22174884 | ../05_Mac | 23.03958 | 22174667 |
| 3R       | 26448624 | 26449192 | ../05_Mac | 23.02296 | 26449046 |
| 2R       | 17071817 | 17072148 | ../05_Mac | 22.98413 | 17071959 |
| 2L       | 20004419 | 20004772 | ../05_Mac | 22.98346 | 20004579 |
| 2R       | 15026748 | 15027125 | ../05_Mac | 22.96738 | 15026946 |
| 2R       | 15460128 | 15460479 | ../05_Mac | 22.96738 | 15460320 |
| 3R       | 11462392 | 11462787 | ../05_Mac | 22.95669 | 11462550 |
| 3L       | 3038831  | 3039137  | ../05_Mac | 22.84019 | 3038975  |
| 3R       | 16239172 | 16239527 | ../05_Mac | 22.84019 | 16239389 |
| 2R       | 16996935 | 16997324 | ../05_Mac | 22.80781 | 16997111 |
| 2R       | 11143619 | 11143951 | ../05_Mac | 22.80198 | 11143786 |
| 2R       | 8248369  | 8249542  | ../05_Mac | 22.78877 | 8249232  |
| 2L       | 8252872  | 8253228  | ../05_Mac | 22.76768 | 8253064  |
| 2R       | 12106310 | 12106787 | ../05_Mac | 22.75235 | 12106465 |
| 3R       | 11445295 | 11445844 | ../05_Mac | 22.73477 | 11445644 |
| 2L       | 2516964  | 2517466  | ../05_Mac | 22.68538 | 2517247  |
| 2R       | 16490141 | 16490403 | ../05_Mac | 22.68538 | 16490293 |
| 2R       | 17988753 | 17989076 | ../05_Mac | 22.68538 | 17988908 |
| 3L       | 5713211  | 5713593  | ../05_Mac | 22.68538 | 5713358  |
| 3R       | 27826122 | 27826564 | ../05_Mac | 22.68538 | 27826374 |
| 3R       | 29515553 | 29515984 | ../05_Mac | 22.68538 | 29515727 |
| 3L       | 16836351 | 16836900 | ../05_Mac | 22.6773  | 16836730 |
| 3L       | 18314945 | 18315684 | ../05_Mac | 22.66447 | 18315264 |
| 2R       | 8417535  | 8417924  | ../05_Mac | 22.64213 | 8417752  |
| 2R       | 8742200  | 8742525  | ../05_Mac | 22.58054 | 8742336  |
| 2R       | 16502858 | 16503242 | ../05_Mac | 22.45285 | 16503048 |
| 3R       | 27411253 | 27411600 | ../05_Mac | 22.43985 | 27411442 |
| 2R       | 11435363 | 11435994 | ../05_Mac | 22.37632 | 11435836 |
| 3L       | 22878758 | 22879035 | ../05_Mac | 22.37488 | 22878888 |
| 3R       | 26387102 | 26387749 | ../05_Mac | 22.36746 | 26387616 |
| 2L       | 18484293 | 18484877 | ../05_Mac | 22.36522 | 18484466 |
| 2L       | 10669184 | 10669459 | ../05_Mac | 22.35586 | 10669308 |
| 2.11E+14 | 1566     | 2132     | ../05_Mac | 22.22612 | 1990     |
| 3L       | 9878184  | 9878540  | ../05_Mac | 22.22612 | 9878373  |
| 3R       | 4293105  | 4293995  | ../05_Mac | 22.22612 | 4293801  |

|    |          |          |           |          |          |
|----|----------|----------|-----------|----------|----------|
| 3R | 4871140  | 4871485  | ../05_Mac | 31.1886  | 4871318  |
| 3R | 28259331 | 28259744 | ../05_Mac | 31.1886  | 28259550 |
| 3L | 4837426  | 4837819  | ../05_Mac | 31.18763 | 4837623  |
| 3L | 22260852 | 22261218 | ../05_Mac | 31.13062 | 22261029 |
| 3L | 4494069  | 4494964  | ../05_Mac | 31.10217 | 4494731  |
| 2L | 10920155 | 10920619 | ../05_Mac | 31.07609 | 10920428 |
| 3L | 6734561  | 6734904  | ../05_Mac | 31.07458 | 6734745  |
| 2L | 10807211 | 10807579 | ../05_Mac | 31.01956 | 10807371 |
| 3L | 2740684  | 2741001  | ../05_Mac | 30.98326 | 2740819  |
| 2R | 22389869 | 22390380 | ../05_Mac | 30.98022 | 22390181 |
| 2L | 11106088 | 11106499 | ../05_Mac | 30.97725 | 11106282 |
| 2R | 9149908  | 9150287  | ../05_Mac | 30.97725 | 9150096  |
| 3L | 18733803 | 18734208 | ../05_Mac | 30.96946 | 18734034 |
| 2R | 16931264 | 16931744 | ../05_Mac | 30.95387 | 16931435 |
| 3L | 20276327 | 20276725 | ../05_Mac | 30.8966  | 20276510 |
| 2L | 9244383  | 9244721  | ../05_Mac | 30.87107 | 9244548  |
| 2L | 15527796 | 15528144 | ../05_Mac | 30.87178 | 15527985 |
| 2L | 17818437 | 17819165 | ../05_Mac | 30.87178 | 17818585 |
| 3L | 13324636 | 13325075 | ../05_Mac | 30.87178 | 13324957 |
| 3R | 10721275 | 10721890 | ../05_Mac | 30.87178 | 10721533 |
| 3R | 16108733 | 16109185 | ../05_Mac | 30.87178 | 16108958 |
| 3R | 17204919 | 17205286 | ../05_Mac | 30.87178 | 17205073 |
| 3R | 28094308 | 28094645 | ../05_Mac | 30.87178 | 28094476 |
| 2R | 12973306 | 12973705 | ../05_Mac | 30.80839 | 12973521 |
| 2R | 14372331 | 14372845 | ../05_Mac | 30.80284 | 14372547 |
| 2R | 23442639 | 23443067 | ../05_Mac | 30.80284 | 23442905 |
| 3R | 3491579  | 3491922  | ../05_Mac | 30.80284 | 3491752  |
| 2L | 9941396  | 9941716  | ../05_Mac | 30.79151 | 9941573  |
| 2L | 19258014 | 19258370 | ../05_Mac | 30.76589 | 19258178 |
| 2L | 7362198  | 7362604  | ../05_Mac | 30.75537 | 7362356  |
| 3R | 27478941 | 27479505 | ../05_Mac | 30.75537 | 27479236 |
| 2R | 20184406 | 20184743 | ../05_Mac | 30.75505 | 20184553 |
| 2R | 18186356 | 18186766 | ../05_Mac | 30.73869 | 18186536 |
| 3L | 18478083 | 18478567 | ../05_Mac | 30.72832 | 18478274 |
| 2L | 5655570  | 5656152  | ../05_Mac | 30.71606 | 5655854  |
| 3L | 14113285 | 14113632 | ../05_Mac | 30.69595 | 14113456 |
| 2R | 15686295 | 15686615 | ../05_Mac | 30.66284 | 15686439 |
| 2L | 19882952 | 19883275 | ../05_Mac | 30.63812 | 19883100 |
| 2L | 21699653 | 21700296 | ../05_Mac | 30.63502 | 21699886 |
| 2L | 9700715  | 9701092  | ../05_Mac | 30.61075 | 9700925  |
| 3L | 15841358 | 15841770 | ../05_Mac | 30.6017  | 15841545 |
| 2L | 3101072  | 3101409  | ../05_Mac | 30.58516 | 3101214  |
| 3R | 10315044 | 10315365 | ../05_Mac | 30.57472 | 10315186 |
| 2L | 4021773  | 4022168  | ../05_Mac | 30.56721 | 4022006  |
| 3L | 19249093 | 19249638 | ../05_Mac | 30.52226 | 19249346 |
| 2L | 8635615  | 8636364  | ../05_Mac | 30.50381 | 8635951  |
| 3R | 17654977 | 17655509 | ../05_Mac | 30.50381 | 17655187 |
| 2L | 14632878 | 14633502 | ../05_Mac | 30.49813 | 14633172 |
| 3R | 29585946 | 29586941 | ../05_Mac | 30.49418 | 29586633 |

|          |          |          |           |          |          |
|----------|----------|----------|-----------|----------|----------|
| 2R       | 23904992 | 23905234 | ../05_Mac | 22.16949 | 23905105 |
| X        | 53355    | 54772    | ../05_Mac | 22.15308 | 54266    |
| 3L       | 11472312 | 11472755 | ../05_Mac | 22.12964 | 11472469 |
| X        | 3689291  | 3689560  | ../05_Mac | 22.12964 | 3689409  |
| 2R       | 15481018 | 15481393 | ../05_Mac | 22.11772 | 15481208 |
| 2R       | 15220787 | 15221160 | ../05_Mac | 22.11557 | 15221030 |
| 2R       | 15943693 | 15944235 | ../05_Mac | 22.05216 | 15944018 |
| 2R       | 10040948 | 10041254 | ../05_Mac | 22.0482  | 10041093 |
| 3R       | 8738596  | 8738934  | ../05_Mac | 22.03375 | 8738737  |
| 3L       | 18457383 | 18457660 | ../05_Mac | 22.033   | 18457554 |
| 3R       | 13679110 | 13679753 | ../05_Mac | 22.01088 | 13679519 |
| 3L       | 14444038 | 14444434 | ../05_Mac | 21.99937 | 14444293 |
| 3R       | 14668238 | 14668592 | ../05_Mac | 21.96447 | 14668464 |
| 2R       | 13958919 | 13959331 | ../05_Mac | 21.95305 | 13959106 |
| 2R       | 7632792  | 7633136  | ../05_Mac | 21.94594 | 7632966  |
| 2R       | 23950458 | 23950784 | ../05_Mac | 21.91057 | 23950606 |
| 2L       | 21926737 | 21927323 | ../05_Mac | 21.90234 | 21927058 |
| 2L       | 10657184 | 10657964 | ../05_Mac | 21.80101 | 10657567 |
| 4        | 1278781  | 1279586  | ../05_Mac | 21.78888 | 1279399  |
| 2.11E+14 | 666      | 1068     | ../05_Mac | 21.77023 | 795      |
| 2.11E+14 | 728      | 1387     | ../05_Mac | 21.77023 | 1205     |
| 2L       | 14150985 | 14151340 | ../05_Mac | 21.77023 | 14151157 |
| 3L       | 19339996 | 19340416 | ../05_Mac | 21.77023 | 19340248 |
| 3R       | 13586545 | 13587276 | ../05_Mac | 21.77023 | 13586686 |
| 3R       | 20425751 | 20426115 | ../05_Mac | 21.77023 | 20425971 |
| 3R       | 26287506 | 26288139 | ../05_Mac | 21.77023 | 26287848 |
| 3R       | 26308416 | 26308757 | ../05_Mac | 21.77023 | 26308577 |
| 3R       | 8177720  | 8178087  | ../05_Mac | 21.76639 | 8177916  |
| 2R       | 24024076 | 24024359 | ../05_Mac | 21.72258 | 24024200 |
| 3R       | 14377215 | 14377674 | ../05_Mac | 21.71708 | 14377363 |
| 2R       | 15296745 | 15296999 | ../05_Mac | 21.70174 | 15296888 |
| 3L       | 17964288 | 17964707 | ../05_Mac | 21.66474 | 17964552 |
| 3L       | 7069078  | 7069461  | ../05_Mac | 21.64305 | 7069230  |
| 3R       | 23875394 | 23876019 | ../05_Mac | 21.63592 | 23875614 |
| 2L       | 21917893 | 21918365 | ../05_Mac | 21.60981 | 21918086 |
| 3L       | 18993905 | 18994735 | ../05_Mac | 21.53791 | 18994404 |
| 2R       | 20508321 | 20508655 | ../05_Mac | 21.5352  | 20508466 |
| 2R       | 19635108 | 19635439 | ../05_Mac | 21.49381 | 19635279 |
| 2L       | 1821267  | 1821599  | ../05_Mac | 21.4544  | 1821432  |
| 3L       | 18622495 | 18622914 | ../05_Mac | 21.41201 | 18622737 |
| 3R       | 12661929 | 12662314 | ../05_Mac | 21.40153 | 12662138 |
| 3R       | 4381398  | 4381841  | ../05_Mac | 21.37259 | 4381578  |
| 4        | 767202   | 767539   | ../05_Mac | 21.36106 | 767349   |
| 2R       | 22794981 | 22795386 | ../05_Mac | 21.35786 | 22795195 |
| 2L       | 15932633 | 15933182 | ../05_Mac | 21.35475 | 15932843 |
| 3R       | 4225933  | 4226308  | ../05_Mac | 21.34681 | 4226085  |
| 2L       | 2301700  | 2302210  | ../05_Mac | 21.31789 | 2301871  |
| 3R       | 31471305 | 31471662 | ../05_Mac | 21.31789 | 31471499 |
| X        | 5864948  | 5865296  | ../05_Mac | 21.31789 | 5865140  |

|    |          |          |           |          |          |
|----|----------|----------|-----------|----------|----------|
| 3R | 7755520  | 7755943  | ../05_Mac | 30.46169 | 7755706  |
| 3L | 16210028 | 16210381 | ../05_Mac | 30.42432 | 16210235 |
| 3R | 15198373 | 15198803 | ../05_Mac | 30.42382 | 15198632 |
| 2L | 843191   | 843510   | ../05_Mac | 30.40512 | 843373   |
| 2L | 6868037  | 6868653  | ../05_Mac | 30.4023  | 6868490  |
| 2L | 15883744 | 15884670 | ../05_Mac | 30.4023  | 15884485 |
| 3R | 8280780  | 8281148  | ../05_Mac | 30.4023  | 8280964  |
| 2L | 9366831  | 9367351  | ../05_Mac | 30.37947 | 9367072  |
| 2R | 4964588  | 4965024  | ../05_Mac | 30.37947 | 4964738  |
| 3R | 5927925  | 5928616  | ../05_Mac | 30.37947 | 5928054  |
| X  | 7765848  | 7766266  | ../05_Mac | 30.37947 | 7765976  |
| 2R | 16511183 | 16511724 | ../05_Mac | 30.3766  | 16511482 |
| 2L | 2913014  | 2913412  | ../05_Mac | 30.37631 | 2913223  |
| 3R | 6929672  | 6930004  | ../05_Mac | 30.36059 | 6929841  |
| 3R | 31656681 | 31657061 | ../05_Mac | 30.35355 | 31656860 |
| 2R | 20725097 | 20725412 | ../05_Mac | 30.33645 | 20725245 |
| 3R | 27221338 | 27221671 | ../05_Mac | 30.32416 | 27221516 |
| 3R | 5443875  | 5444264  | ../05_Mac | 30.32214 | 5444089  |
| 2R | 8249902  | 8250756  | ../05_Mac | 30.30515 | 8250498  |
| 2L | 11851163 | 11851560 | ../05_Mac | 30.29549 | 11851355 |
| 3R | 21949196 | 21949646 | ../05_Mac | 30.25411 | 21949341 |
| 2L | 11592335 | 11592737 | ../05_Mac | 30.24416 | 11592569 |
| 3L | 13945693 | 13946106 | ../05_Mac | 30.18624 | 13945913 |
| 3R | 6313610  | 6314145  | ../05_Mac | 30.11324 | 6313803  |
| 3R | 9495760  | 9496119  | ../05_Mac | 30.09372 | 9495942  |
| 2L | 21772926 | 21773403 | ../05_Mac | 30.06843 | 21773110 |
| 3L | 17928913 | 17929245 | ../05_Mac | 30.06843 | 17929087 |
| 3L | 20084675 | 20085031 | ../05_Mac | 30.06307 | 20084851 |
| 2R | 11403868 | 11404459 | ../05_Mac | 30.02912 | 11404203 |
| 3R | 30538029 | 30538362 | ../05_Mac | 29.98506 | 30538211 |
| 3R | 13341959 | 13342532 | ../05_Mac | 29.97791 | 13342199 |
| 2L | 14349152 | 14349937 | ../05_Mac | 29.95697 | 14349324 |
| 3L | 6876475  | 6877017  | ../05_Mac | 29.94854 | 6876662  |
| 2L | 6192145  | 6192467  | ../05_Mac | 29.9437  | 6192273  |
| 2R | 13365278 | 13365625 | ../05_Mac | 29.9437  | 13365456 |
| 3L | 18691058 | 18691790 | ../05_Mac | 29.9437  | 18691489 |
| 3L | 28090327 | 28090690 | ../05_Mac | 29.9437  | 28090517 |
| 3R | 5970037  | 5970419  | ../05_Mac | 29.9437  | 5970251  |
| 3R | 10947388 | 10947674 | ../05_Mac | 29.9437  | 10947547 |
| 3R | 18828612 | 18828969 | ../05_Mac | 29.9437  | 18828788 |
| X  | 4414522  | 4414809  | ../05_Mac | 29.9437  | 4414659  |
| X  | 11298357 | 11298695 | ../05_Mac | 29.9437  | 11298520 |
| 2R | 11566608 | 11567325 | ../05_Mac | 29.93354 | 11567168 |
| 2R | 16095591 | 16095887 | ../05_Mac | 29.92968 | 16095752 |
| 3L | 568071   | 568400   | ../05_Mac | 29.90832 | 568222   |
| 3L | 19168221 | 19168554 | ../05_Mac | 29.89726 | 19168396 |
| 2L | 15469573 | 15469993 | ../05_Mac | 29.89486 | 15469758 |
| 2R | 18222523 | 18222841 | ../05_Mac | 29.89486 | 18222660 |
| 3R | 12893426 | 12893726 | ../05_Mac | 29.89221 | 12893555 |

|          |          |          |           |          |          |
|----------|----------|----------|-----------|----------|----------|
| 2R       | 22043393 | 22043779 | ../05_Mac | 21.28309 | 22043578 |
| 3L       | 12847844 | 12848327 | ../05_Mac | 21.26607 | 12848070 |
| 3L       | 7483987  | 7484502  | ../05_Mac | 21.2104  | 7484267  |
| 3R       | 9393520  | 9393971  | ../05_Mac | 21.18498 | 9393706  |
| X        | 8595459  | 8595752  | ../05_Mac | 21.17418 | 8595610  |
| 2R       | 7719818  | 7720102  | ../05_Mac | 21.16383 | 7719970  |
| 2L       | 3613617  | 3613930  | ../05_Mac | 21.10933 | 3613764  |
| 3L       | 3102949  | 3103245  | ../05_Mac | 21.06083 | 3103078  |
| 3L       | 8211535  | 8212072  | ../05_Mac | 20.95709 | 8211864  |
| 2R       | 22796887 | 22797423 | ../05_Mac | 20.88411 | 22797038 |
| 2L       | 6177674  | 6177956  | ../05_Mac | 20.86913 | 6177809  |
| 2R       | 1691210  | 1691590  | ../05_Mac | 20.86913 | 1691449  |
| 2R       | 8799933  | 8800422  | ../05_Mac | 20.86913 | 8800248  |
| 3R       | 27882893 | 27883284 | ../05_Mac | 20.86913 | 27883044 |
| X        | 10618912 | 10619337 | ../05_Mac | 20.86913 | 10619099 |
| X        | 20745851 | 20746138 | ../05_Mac | 20.86913 | 20746007 |
| 2L       | 3758020  | 3758341  | ../05_Mac | 20.86536 | 3758189  |
| 3L       | 11448579 | 11449068 | ../05_Mac | 20.79408 | 11448832 |
| 2.11E+14 | 1412     | 1628     | ../05_Mac | 20.77171 | 1550     |
| 3L       | 21281202 | 21281633 | ../05_Mac | 20.7175  | 21281434 |
| 3R       | 29903158 | 29903460 | ../05_Mac | 20.64763 | 29903302 |
| 2R       | 18723398 | 18723724 | ../05_Mac | 20.61559 | 18723563 |
| X        | 19742964 | 19743345 | ../05_Mac | 20.60205 | 19743165 |
| 2L       | 8418612  | 8419003  | ../05_Mac | 20.5571  | 8418814  |
| 3R       | 12274878 | 12275177 | ../05_Mac | 20.54517 | 12275007 |
| 3R       | 15702202 | 15702524 | ../05_Mac | 20.53332 | 15702343 |
| X        | 5618460  | 5618832  | ../05_Mac | 20.53332 | 5618701  |
| 3R       | 19029747 | 19030083 | ../05_Mac | 20.50616 | 19029896 |
| 3L       | 21409002 | 21409289 | ../05_Mac | 20.47334 | 21409126 |
| 2L       | 15830704 | 15831105 | ../05_Mac | 20.4514  | 15830861 |
| Y        | 887255   | 887697   | ../05_Mac | 20.44851 | 887438   |
| 2.11E+14 | 1900     | 2201     | ../05_Mac | 20.42355 | 2079     |
| 2L       | 20607621 | 20608021 | ../05_Mac | 20.42355 | 20607895 |
| 3R       | 28573565 | 28573832 | ../05_Mac | 20.42355 | 28573697 |
| 3L       | 14761842 | 14762222 | ../05_Mac | 20.42254 | 14762006 |
| 3L       | 10824666 | 10825180 | ../05_Mac | 20.38516 | 10825004 |
| 3L       | 1806777  | 1807150  | ../05_Mac | 20.37714 | 1806942  |
| 2L       | 1246487  | 1246818  | ../05_Mac | 20.33736 | 1246656  |
| 3R       | 25508324 | 25508735 | ../05_Mac | 20.3321  | 25508449 |
| 3L       | 14358458 | 14358745 | ../05_Mac | 20.3059  | 14358590 |
| 3R       | 18212408 | 18212686 | ../05_Mac | 20.27057 | 18212539 |
| 2L       | 14532756 | 14533651 | ../05_Mac | 20.22199 | 14532921 |
| 3L       | 12544931 | 12545411 | ../05_Mac | 20.18416 | 12545109 |
| 2R       | 10175479 | 10175810 | ../05_Mac | 20.12489 | 10175651 |
| 2L       | 10910071 | 10910430 | ../05_Mac | 20.06899 | 10910257 |
| 3L       | 1553540  | 1553946  | ../05_Mac | 20.0634  | 1553799  |
| 2R       | 20882887 | 20883265 | ../05_Mac | 20.02102 | 20883074 |
| 3L       | 527041   | 527416   | ../05_Mac | 20.02102 | 527207   |
| 2L       | 11296546 | 11296991 | ../05_Mac | 20.0108  | 11296730 |

|    |          |          |           |          |          |
|----|----------|----------|-----------|----------|----------|
| 2R | 11507573 | 11507927 | ../05_Mac | 29.89028 | 11507759 |
| 3R | 31512344 | 31512676 | ../05_Mac | 29.89028 | 31512523 |
| 2L | 17297913 | 17298241 | ../05_Mac | 29.88926 | 17298060 |
| 3R | 16977114 | 16977498 | ../05_Mac | 29.88682 | 16977285 |
| 2L | 6857612  | 6857942  | ../05_Mac | 29.83841 | 6857778  |
| 3L | 16205687 | 16206335 | ../05_Mac | 29.83537 | 16205834 |
| 2R | 16687176 | 16687630 | ../05_Mac | 29.80404 | 16687402 |
| 3L | 5382803  | 5383273  | ../05_Mac | 29.78675 | 5383068  |
| 3R | 31244118 | 31244523 | ../05_Mac | 29.78675 | 31244357 |
| 2R | 6095621  | 6096012  | ../05_Mac | 29.78227 | 6095809  |
| 3L | 383224   | 383612   | ../05_Mac | 29.73021 | 383383   |
| 3L | 10348174 | 10348678 | ../05_Mac | 29.71236 | 10348445 |
| 2R | 20171090 | 20171457 | ../05_Mac | 29.7056  | 20171269 |
| 3L | 16889485 | 16889875 | ../05_Mac | 29.70478 | 16889639 |
| 3R | 23527297 | 23527607 | ../05_Mac | 29.69813 | 23527431 |
| 3R | 4304545  | 4305005  | ../05_Mac | 29.69664 | 4304752  |
| 3L | 11437403 | 11437755 | ../05_Mac | 29.68226 | 11437543 |
| 3R | 26139680 | 26140685 | ../05_Mac | 29.68226 | 26139888 |
| 3L | 9204836  | 9205235  | ../05_Mac | 29.67999 | 9205012  |
| 3R | 24012197 | 24012612 | ../05_Mac | 29.6797  | 24012421 |
| 2L | 11273740 | 11274075 | ../05_Mac | 29.66387 | 11273904 |
| 2L | 17380671 | 17381006 | ../05_Mac | 29.66384 | 17380828 |
| 2R | 12287687 | 12288184 | ../05_Mac | 29.66384 | 12288007 |
| 3R | 9757453  | 9757922  | ../05_Mac | 29.66268 | 9757612  |
| 3L | 18586535 | 18587066 | ../05_Mac | 29.65482 | 18586738 |
| 3R | 8841697  | 8842230  | ../05_Mac | 29.63875 | 8842001  |
| 3R | 24373701 | 24374116 | ../05_Mac | 29.63321 | 24373921 |
| 3L | 14424231 | 14424657 | ../05_Mac | 29.62333 | 14424452 |
| 3L | 15898901 | 15899233 | ../05_Mac | 29.60646 | 15899049 |
| 3R | 23550925 | 23551335 | ../05_Mac | 29.60471 | 23551111 |
| 3R | 9432558  | 9432921  | ../05_Mac | 29.59428 | 9432771  |
| 2L | 22704585 | 22704980 | ../05_Mac | 29.58293 | 22704800 |
| 2L | 6395880  | 6396208  | ../05_Mac | 29.51291 | 6396031  |
| 2L | 2401142  | 2401430  | ../05_Mac | 29.51047 | 2401279  |
| 2R | 1602024  | 1602426  | ../05_Mac | 29.51047 | 1602212  |
| 3L | 13553989 | 13554359 | ../05_Mac | 29.51047 | 13554177 |
| 3L | 16246788 | 16247298 | ../05_Mac | 29.51047 | 16247095 |
| 3R | 20349098 | 20349433 | ../05_Mac | 29.51047 | 20349239 |
| 3R | 22228847 | 22229210 | ../05_Mac | 29.51047 | 22229061 |
| 3R | 27423756 | 27424153 | ../05_Mac | 29.51047 | 27423934 |
| 3R | 27430252 | 27430711 | ../05_Mac | 29.51047 | 27430410 |
| X  | 20874625 | 20874908 | ../05_Mac | 29.51047 | 20874780 |
| 3R | 25403090 | 25403454 | ../05_Mac | 29.49526 | 25403280 |
| 3L | 9023097  | 9023482  | ../05_Mac | 29.4847  | 9023251  |
| 2R | 8345156  | 8345573  | ../05_Mac | 29.47319 | 8345388  |
| 3L | 6111924  | 6112323  | ../05_Mac | 29.47319 | 6112117  |
| 3L | 3004853  | 3005246  | ../05_Mac | 29.46452 | 3005029  |
| 2L | 370487   | 371314   | ../05_Mac | 29.45311 | 371167   |
| 2L | 10537330 | 10537965 | ../05_Mac | 29.43468 | 10537500 |

|          |          |          |           |          |          |
|----------|----------|----------|-----------|----------|----------|
| 3R       | 31159469 | 31159821 | ../05_Mac | 20.0108  | 31159623 |
| 3L       | 5232197  | 5232480  | ../05_Mac | 19.99034 | 5232351  |
| 2L       | 16063748 | 16064164 | ../05_Mac | 19.98111 | 16063943 |
| 3L       | 5044051  | 5044358  | ../05_Mac | 19.98111 | 5044209  |
| 3L       | 17259562 | 17260089 | ../05_Mac | 19.98111 | 17259900 |
| 3R       | 4270519  | 4270774  | ../05_Mac | 19.98111 | 4270684  |
| 3R       | 11356536 | 11356808 | ../05_Mac | 19.98111 | 11356668 |
| 3R       | 20079894 | 20080268 | ../05_Mac | 19.98111 | 20080119 |
| 3R       | 27453487 | 27453847 | ../05_Mac | 19.98111 | 27453660 |
| 3R       | 28101935 | 28102301 | ../05_Mac | 19.98111 | 28102161 |
| 2R       | 24268420 | 24268764 | ../05_Mac | 19.94338 | 24268598 |
| 3R       | 30994137 | 30994465 | ../05_Mac | 19.94338 | 30994328 |
| 2.11E+14 | 1233     | 1619     | ../05_Mac | 19.86899 | 1428     |
| 3L       | 11645485 | 11645815 | ../05_Mac | 19.85512 | 11645662 |
| 2L       | 6576393  | 6576702  | ../05_Mac | 19.84987 | 6576557  |
| 3L       | 7395723  | 7396078  | ../05_Mac | 19.81319 | 7395898  |
| 2L       | 6484096  | 6484391  | ../05_Mac | 19.79919 | 6484228  |
| 2L       | 3706964  | 3707265  | ../05_Mac | 19.79594 | 3707094  |
| 2R       | 7909480  | 7909851  | ../05_Mac | 19.79594 | 7909662  |
| 3R       | 4687449  | 4687923  | ../05_Mac | 19.7657  | 4687601  |
| 3R       | 19533308 | 19533969 | ../05_Mac | 19.76353 | 19533777 |
| 2R       | 12339969 | 12340325 | ../05_Mac | 19.72516 | 12340155 |
| 3L       | 15496466 | 15496813 | ../05_Mac | 19.69833 | 15496592 |
| 3L       | 18949436 | 18949777 | ../05_Mac | 19.6743  | 18949608 |
| 2L       | 6705213  | 6705729  | ../05_Mac | 19.64003 | 6705448  |
| 2R       | 12582720 | 12583035 | ../05_Mac | 19.63368 | 12582879 |
| 3R       | 26761670 | 26762222 | ../05_Mac | 19.61565 | 26762048 |
| 2R       | 21238197 | 21238527 | ../05_Mac | 19.61477 | 21238352 |
| 3L       | 458064   | 458410   | ../05_Mac | 19.59151 | 458250   |
| 3R       | 14943765 | 14944199 | ../05_Mac | 19.58724 | 14944013 |
| 3R       | 5244194  | 5244557  | ../05_Mac | 19.54891 | 5244378  |
| 2.11E+14 | 2028     | 2308     | ../05_Mac | 19.54259 | 2208     |
| 2R       | 16456829 | 16457360 | ../05_Mac | 19.54259 | 16457091 |
| 3L       | 12325297 | 12325642 | ../05_Mac | 19.54259 | 12325461 |
| 3L       | 13598293 | 13598694 | ../05_Mac | 19.54259 | 13598546 |
| 3R       | 30179351 | 30179681 | ../05_Mac | 19.53786 | 30179492 |
| 3L       | 21652855 | 21653156 | ../05_Mac | 19.51544 | 21653010 |
| 2R       | 870261   | 870545   | ../05_Mac | 19.51088 | 870379   |
| 3R       | 7948152  | 7948951  | ../05_Mac | 19.50028 | 7948317  |
| 3R       | 14501805 | 14502195 | ../05_Mac | 19.41213 | 14501995 |
| 3L       | 10747900 | 10748251 | ../05_Mac | 19.4109  | 10748067 |
| 3R       | 19480932 | 19481230 | ../05_Mac | 19.4109  | 19481090 |
| 3R       | 20719063 | 20719460 | ../05_Mac | 19.39011 | 20719262 |
| 2R       | 8159433  | 8160006  | ../05_Mac | 19.34907 | 8159571  |
| 3R       | 17434773 | 17435939 | ../05_Mac | 19.34903 | 17435349 |
| 3L       | 3037287  | 3037608  | ../05_Mac | 19.20371 | 3037465  |
| 3R       | 6739484  | 6739866  | ../05_Mac | 19.19678 | 6739682  |
| 2R       | 25206508 | 25206872 | ../05_Mac | 19.15726 | 25206673 |
| 2.11E+14 | 2138     | 2392     | ../05_Mac | 19.1073  | 2304     |

|          |          |          |           |          |          |
|----------|----------|----------|-----------|----------|----------|
| 3L       | 8886405  | 8886740  | ../05_Mac | 29.43424 | 8886569  |
| 2L       | 11330811 | 11331128 | ../05_Mac | 29.42556 | 11330981 |
| 3L       | 64794    | 65212    | ../05_Mac | 29.41113 | 64975    |
| 2L       | 18133517 | 18133862 | ../05_Mac | 29.37557 | 18133688 |
| 3R       | 5817074  | 5817435  | ../05_Mac | 29.37104 | 5817242  |
| 2L       | 13862465 | 13863043 | ../05_Mac | 29.296   | 13862866 |
| 2L       | 19367664 | 19368050 | ../05_Mac | 29.296   | 19367867 |
| 3R       | 8212341  | 8212811  | ../05_Mac | 29.28393 | 8212629  |
| Unmapped | 19419    | 19841    | ../05_Mac | 29.27039 | 19584    |
| 2R       | 5833370  | 5833912  | ../05_Mac | 29.26128 | 5833691  |
| 3L       | 12783918 | 12784299 | ../05_Mac | 29.25104 | 12784099 |
| 3L       | 22214387 | 22214941 | ../05_Mac | 29.21296 | 22214573 |
| 3L       | 9694946  | 9695306  | ../05_Mac | 29.21151 | 9695123  |
| 2L       | 11950753 | 11951217 | ../05_Mac | 29.19788 | 11950921 |
| 2R       | 21783677 | 21784212 | ../05_Mac | 29.17262 | 21783873 |
| 3L       | 8830192  | 8830855  | ../05_Mac | 29.14887 | 8830587  |
| 2R       | 16376412 | 16376826 | ../05_Mac | 29.14304 | 16376654 |
| 3L       | 14239081 | 14239510 | ../05_Mac | 29.13357 | 14239277 |
| 2R       | 8874542  | 8874889  | ../05_Mac | 29.11895 | 8874702  |
| 3L       | 5969244  | 5969681  | ../05_Mac | 29.08729 | 5969481  |
| 3L       | 10931763 | 10932402 | ../05_Mac | 29.08729 | 10931909 |
| 3L       | 8327465  | 8327809  | ../05_Mac | 29.08009 | 8327651  |
| 2R       | 8853052  | 8853500  | ../05_Mac | 29.07931 | 8853287  |
| 2R       | 20797710 | 20798057 | ../05_Mac | 29.07931 | 20797877 |
| 3L       | 5060296  | 5060870  | ../05_Mac | 29.07931 | 5060626  |
| 3R       | 12826369 | 12826671 | ../05_Mac | 29.07931 | 12826525 |
| 3R       | 16415845 | 16416607 | ../05_Mac | 29.07931 | 16416455 |
| 3R       | 17313728 | 17314089 | ../05_Mac | 29.07931 | 17313905 |
| 3R       | 29342822 | 29343157 | ../05_Mac | 29.07931 | 29342981 |
| Y        | 3264457  | 3264710  | ../05_Mac | 29.07931 | 3264636  |
| 3L       | 4201196  | 4201550  | ../05_Mac | 29.06109 | 4201375  |
| 2L       | 15336618 | 15337004 | ../05_Mac | 29.0444  | 15336867 |
| 2R       | 13346088 | 13346523 | ../05_Mac | 29.03089 | 13346242 |
| 3R       | 28003588 | 28003945 | ../05_Mac | 29.02783 | 28003766 |
| 2L       | 9332232  | 9332817  | ../05_Mac | 29.02493 | 9332462  |
| 3R       | 24948459 | 24948875 | ../05_Mac | 28.95309 | 24948687 |
| 2L       | 2592805  | 2593152  | ../05_Mac | 28.93611 | 2592950  |
| 3R       | 5692743  | 5693063  | ../05_Mac | 28.88976 | 5692883  |
| 3R       | 7480492  | 7480914  | ../05_Mac | 28.86097 | 7480672  |
| 3R       | 12779199 | 12779656 | ../05_Mac | 28.86097 | 12779371 |
| 2R       | 8221335  | 8221880  | ../05_Mac | 28.84339 | 8221609  |
| 3R       | 11776896 | 11777317 | ../05_Mac | 28.82789 | 11777087 |
| 2L       | 4132722  | 4133167  | ../05_Mac | 28.82625 | 4132980  |
| 3L       | 3867872  | 3868332  | ../05_Mac | 28.80968 | 3868037  |
| 2L       | 2098642  | 2098976  | ../05_Mac | 28.78821 | 2098793  |
| 2L       | 7713231  | 7713600  | ../05_Mac | 28.77797 | 7713410  |
| 3R       | 8567799  | 8568184  | ../05_Mac | 28.76326 | 8567954  |
| 3R       | 16892214 | 16892647 | ../05_Mac | 28.76326 | 16892456 |
| 2L       | 1057622  | 1058037  | ../05_Mac | 28.76299 | 1057855  |



|          |          |          |           |          |          |
|----------|----------|----------|-----------|----------|----------|
| 2L       | 9832483  | 9832755  | ../05_Mac | 19.1073  | 9832650  |
| 3R       | 4944652  | 4945206  | ../05_Mac | 19.1073  | 4944989  |
| 3R       | 29607000 | 29607306 | ../05_Mac | 19.1073  | 29607130 |
| X        | 7872670  | 7872908  | ../05_Mac | 19.1073  | 7872817  |
| X        | 15587554 | 15587900 | ../05_Mac | 19.1073  | 15587707 |
| 2R       | 23350209 | 23350595 | ../05_Mac | 19.10446 | 23350405 |
| 3L       | 10278769 | 10279155 | ../05_Mac | 19.09395 | 10279001 |
| 3L       | 6784718  | 6785244  | ../05_Mac | 19.07048 | 6784932  |
| 2R       | 18863771 | 18864380 | ../05_Mac | 19.0139  | 18864039 |
| 3R       | 29567151 | 29567509 | ../05_Mac | 18.96906 | 29567315 |
| 2L       | 8836337  | 8836824  | ../05_Mac | 18.94081 | 8836471  |
| 3R       | 19297532 | 19297822 | ../05_Mac | 18.93763 | 19297665 |
| 3L       | 23751912 | 23752266 | ../05_Mac | 18.92329 | 23752106 |
| 3R       | 8151615  | 8151911  | ../05_Mac | 18.92167 | 8151776  |
| 2R       | 10247359 | 10248314 | ../05_Mac | 18.86038 | 10248002 |
| 3R       | 31256292 | 31256549 | ../05_Mac | 18.85097 | 31256415 |
| 3L       | 6376757  | 6377344  | ../05_Mac | 18.84989 | 6377157  |
| 3L       | 962620   | 962954   | ../05_Mac | 18.83302 | 962731   |
| 2R       | 18416495 | 18416840 | ../05_Mac | 18.82937 | 18416680 |
| 2L       | 18124593 | 18124905 | ../05_Mac | 18.82677 | 18124739 |
| 2L       | 2287724  | 2288089  | ../05_Mac | 18.81553 | 2287920  |
| 2L       | 6886502  | 6886841  | ../05_Mac | 18.75503 | 6886625  |
| 2L       | 21670419 | 21670881 | ../05_Mac | 18.73715 | 21670631 |
| 3R       | 26316677 | 26316972 | ../05_Mac | 18.73665 | 26316827 |
| 3R       | 8390242  | 8390536  | ../05_Mac | 18.70197 | 8390408  |
| 2R       | 7447394  | 7447663  | ../05_Mac | 18.70139 | 7447533  |
| 2R       | 20007248 | 20007554 | ../05_Mac | 18.69701 | 20007395 |
| 2L       | 11307660 | 11307928 | ../05_Mac | 18.67546 | 11307772 |
| 2R       | 3554650  | 3555063  | ../05_Mac | 18.67546 | 3554896  |
| X        | 18920806 | 18921067 | ../05_Mac | 18.67546 | 18920900 |
| 2.11E+14 | 1017     | 1681     | ../05_Mac | 18.66554 | 1461     |
| 2R       | 8561479  | 8561846  | ../05_Mac | 18.65944 | 8561667  |
| 3R       | 21365153 | 21365661 | ../05_Mac | 18.63772 | 21365475 |
| 3R       | 8734470  | 8734783  | ../05_Mac | 18.62773 | 8734651  |
| 3L       | 16271449 | 16271802 | ../05_Mac | 18.61838 | 16271632 |
| 2R       | 10946068 | 10946453 | ../05_Mac | 18.58446 | 10946235 |
| 3R       | 21898068 | 21898366 | ../05_Mac | 18.56553 | 21898236 |
| 3R       | 22405827 | 22406111 | ../05_Mac | 18.55488 | 22405964 |
| 2L       | 20297184 | 20297510 | ../05_Mac | 18.53434 | 20297318 |
| 2L       | 15550238 | 15550635 | ../05_Mac | 18.5297  | 15550401 |
| 3R       | 16805495 | 16805846 | ../05_Mac | 18.5062  | 16805675 |
| Y_mapped | 13422    | 14011    | ../05_Mac | 18.47536 | 13604    |
| 3R       | 9074472  | 9075278  | ../05_Mac | 18.46133 | 9074636  |
| 3R       | 19796107 | 19796420 | ../05_Mac | 18.46133 | 19796267 |
| 3R       | 5659764  | 5660095  | ../05_Mac | 18.44444 | 5659917  |
| 2.11E+14 | 689      | 1044     | ../05_Mac | 18.38242 | 845      |
| 3L       | 20782642 | 20782955 | ../05_Mac | 18.34793 | 20782800 |
| 3R       | 15290709 | 15290976 | ../05_Mac | 18.30732 | 15290856 |
| 2R       | 9577843  | 9578217  | ../05_Mac | 18.25273 | 9578059  |

|    |          |          |           |          |          |
|----|----------|----------|-----------|----------|----------|
| 2R | 21213265 | 21213964 | ../05_Mac | 28.76084 | 21213438 |
| 2L | 3344816  | 3345461  | ../05_Mac | 28.7397  | 3345000  |
| 2L | 11475296 | 11475708 | ../05_Mac | 28.73908 | 11475491 |
| 3L | 7110469  | 7110894  | ../05_Mac | 28.73908 | 7110727  |
| 3R | 25717074 | 25717424 | ../05_Mac | 28.73908 | 25717260 |
| 2R | 16909631 | 16909985 | ../05_Mac | 28.73438 | 16909816 |
| 3L | 14555012 | 14555350 | ../05_Mac | 28.73141 | 14555157 |
| 2R | 23116054 | 23116465 | ../05_Mac | 28.72092 | 23116234 |
| 3R | 27668843 | 27669185 | ../05_Mac | 28.72092 | 27668995 |
| 3L | 9122458  | 9122864  | ../05_Mac | 28.71523 | 9122628  |
| 2R | 18444554 | 18444885 | ../05_Mac | 28.70112 | 18444694 |
| 2R | 17095885 | 17096310 | ../05_Mac | 28.67449 | 17096055 |
| 2L | 4138520  | 4139219  | ../05_Mac | 28.67345 | 4139009  |
| 3R | 26223499 | 26224400 | ../05_Mac | 28.67345 | 26223735 |
| 2L | 6596265  | 6596633  | ../05_Mac | 28.65074 | 6596440  |
| 2R | 3477809  | 3478294  | ../05_Mac | 28.65074 | 3478037  |
| 2R | 4956325  | 4957001  | ../05_Mac | 28.65074 | 4956822  |
| 2R | 10370751 | 10371094 | ../05_Mac | 28.65074 | 10370923 |
| 3L | 21768360 | 21768790 | ../05_Mac | 28.65074 | 21768613 |
| X  | 11228759 | 11229110 | ../05_Mac | 28.65074 | 11228900 |
| X  | 23343379 | 23343781 | ../05_Mac | 28.65074 | 23343555 |
| 3R | 24835261 | 24835893 | ../05_Mac | 28.64897 | 24835535 |
| 2R | 16713472 | 16713986 | ../05_Mac | 28.64808 | 16713618 |
| 2L | 16395538 | 16396136 | ../05_Mac | 28.64631 | 16395907 |
| 3R | 26729685 | 26730051 | ../05_Mac | 28.64631 | 26729865 |
| 3L | 20901628 | 20901970 | ../05_Mac | 28.63769 | 20901779 |
| 2R | 23608673 | 23609244 | ../05_Mac | 28.61669 | 23608850 |
| 3L | 20111502 | 20111845 | ../05_Mac | 28.61594 | 20111684 |
| 2L | 2092707  | 2093045  | ../05_Mac | 28.6101  | 2092845  |
| 3R | 31467362 | 31467697 | ../05_Mac | 28.60769 | 31467531 |
| 3R | 26066318 | 26066671 | ../05_Mac | 28.60498 | 26066512 |
| 3R | 10642821 | 10643265 | ../05_Mac | 28.60068 | 10643060 |
| 3R | 11521469 | 11521906 | ../05_Mac | 28.59702 | 11521663 |
| 2R | 18470418 | 18470866 | ../05_Mac | 28.59238 | 18470613 |
| 3R | 18186924 | 18187272 | ../05_Mac | 28.57119 | 18187116 |
| 3L | 10682794 | 10683385 | ../05_Mac | 28.54549 | 10683180 |
| 2L | 12449593 | 12450563 | ../05_Mac | 28.53054 | 12450338 |
| 3L | 4088077  | 4088476  | ../05_Mac | 28.50104 | 4088272  |
| 3L | 22424932 | 22425317 | ../05_Mac | 28.50104 | 22425137 |
| 2L | 7246547  | 7247035  | ../05_Mac | 28.48217 | 7246717  |
| 2R | 6743666  | 6744045  | ../05_Mac | 28.47307 | 6743847  |
| 2R | 18104584 | 18104949 | ../05_Mac | 28.46235 | 18104787 |
| 3L | 6432340  | 6432701  | ../05_Mac | 28.46235 | 6432533  |
| 3R | 9870611  | 9871539  | ../05_Mac | 28.45512 | 9871298  |
| 2L | 12855805 | 12856302 | ../05_Mac | 28.44378 | 12856081 |
| 2R | 18886982 | 18887402 | ../05_Mac | 28.44378 | 18887222 |
| 3L | 6072233  | 6072618  | ../05_Mac | 28.4389  | 6072421  |
| 3L | 10865357 | 10865703 | ../05_Mac | 28.4389  | 10865537 |
| 2R | 12727073 | 12727397 | ../05_Mac | 28.40466 | 12727258 |

|          |          |          |           |          |          |
|----------|----------|----------|-----------|----------|----------|
| 3R       | 26621450 | 26621778 | ../05_Mac | 18.24741 | 26621648 |
| X        | 18259420 | 18259690 | ../05_Mac | 18.24741 | 18259565 |
| 2R       | 13593668 | 13594002 | ../05_Mac | 18.20905 | 13593885 |
| 2R       | 17033242 | 17034319 | ../05_Mac | 18.19196 | 17033413 |
| 3L       | 17540855 | 17541177 | ../05_Mac | 18.15755 | 17541037 |
| 2.11E+14 | 870      | 1171     | ../05_Mac | 18.09393 | 973      |
| 2L       | 11299964 | 11300255 | ../05_Mac | 18.07989 | 11300118 |
| 2L       | 8593896  | 8594365  | ../05_Mac | 18.04361 | 8594131  |
| 2.11E+14 | 1696     | 2302     | ../05_Mac | 17.97932 | 1854     |
| X        | 17702738 | 17703053 | ../05_Mac | 17.90875 | 17702882 |
| 3L       | 5231701  | 5232029  | ../05_Mac | 17.90662 | 5231882  |
| 3R       | 20445975 | 20446274 | ../05_Mac | 17.87864 | 20446128 |
| 2R       | 25165440 | 25165722 | ../05_Mac | 17.82515 | 25165555 |
| 2R       | 22348227 | 22349009 | ../05_Mac | 17.82293 | 22348807 |
| 3L       | 10075723 | 10076044 | ../05_Mac | 17.82293 | 10075898 |
| 2R       | 13928889 | 13929359 | ../05_Mac | 17.80732 | 13929214 |
| 3R       | 16902522 | 16902825 | ../05_Mac | 17.80157 | 16902651 |
| 3L       | 13248508 | 13248922 | ../05_Mac | 17.7746  | 13248612 |
| 2L       | 10930293 | 10930902 | ../05_Mac | 17.74554 | 10930638 |
| 2R       | 8900124  | 8900380  | ../05_Mac | 17.72027 | 8900268  |
| 2L       | 3767816  | 3768113  | ../05_Mac | 17.71231 | 3767965  |
| 2R       | 17527270 | 17527534 | ../05_Mac | 17.66517 | 17527380 |
| 2R       | 19671001 | 19671261 | ../05_Mac | 17.65831 | 19671124 |
| 3R       | 25616793 | 25617138 | ../05_Mac | 17.62219 | 25616943 |
| 2L       | 19380670 | 19381140 | ../05_Mac | 17.61995 | 19380884 |
| 3L       | 9995429  | 9995787  | ../05_Mac | 17.57718 | 9995564  |
| 3R       | 4916579  | 4916944  | ../05_Mac | 17.56195 | 4916789  |
| X        | 1894338  | 1894629  | ../05_Mac | 17.54851 | 1894485  |
| 2L       | 9148194  | 9148526  | ../05_Mac | 17.54301 | 9148334  |
| 3R       | 8653537  | 8653823  | ../05_Mac | 17.53352 | 8653691  |
| 2.11E+14 | 1047     | 1479     | ../05_Mac | 17.51902 | 1133     |
| 3L       | 6681687  | 6681992  | ../05_Mac | 17.50949 | 6681797  |
| 3L       | 19228772 | 19229205 | ../05_Mac | 17.47377 | 19228946 |
| 2R       | 24932147 | 24932466 | ../05_Mac | 17.44725 | 24932285 |
| 2L       | 15325862 | 15326131 | ../05_Mac | 17.40207 | 15325967 |
| 3L       | 12564403 | 12564680 | ../05_Mac | 17.40207 | 12564513 |
| 3R       | 11486617 | 11486958 | ../05_Mac | 17.40207 | 11486775 |
| 3R       | 29354289 | 29354639 | ../05_Mac | 17.40207 | 29354427 |
| 2L       | 20438696 | 20438976 | ../05_Mac | 17.3926  | 20438830 |
| 3L       | 15042918 | 15043265 | ../05_Mac | 17.38275 | 15043109 |
| 2R       | 15607247 | 15607579 | ../05_Mac | 17.36985 | 15607389 |
| 2L       | 40332    | 41237    | ../05_Mac | 17.34404 | 40659    |
| 2L       | 21075539 | 21075839 | ../05_Mac | 17.34404 | 21075665 |
| 3R       | 19087722 | 19088297 | ../05_Mac | 17.34372 | 19087951 |
| 2L       | 7762442  | 7762715  | ../05_Mac | 17.26646 | 7762591  |
| 2R       | 21991868 | 21992233 | ../05_Mac | 17.26646 | 21992044 |
| 3L       | 3567555  | 3568030  | ../05_Mac | 17.24861 | 3567703  |
| 3L       | 1729298  | 1729632  | ../05_Mac | 17.16952 | 1729459  |
| 3L       | 5134353  | 5134733  | ../05_Mac | 17.15115 | 5134542  |

|    |          |          |           |          |          |
|----|----------|----------|-----------|----------|----------|
| 2R | 11922327 | 11922772 | ../05_Mac | 28.35884 | 11922572 |
| 3L | 9260976  | 9261350  | ../05_Mac | 28.358   | 9261154  |
| 2R | 21806986 | 21807383 | ../05_Mac | 28.3424  | 21807157 |
| 2R | 12928896 | 12929294 | ../05_Mac | 28.33749 | 12929050 |
| 2L | 14893043 | 14893504 | ../05_Mac | 28.32742 | 14893227 |
| 3R | 18833132 | 18833792 | ../05_Mac | 28.32742 | 18833592 |
| 3R | 4502974  | 4503323  | ../05_Mac | 28.31277 | 4503142  |
| 3R | 25427257 | 25427914 | ../05_Mac | 28.29966 | 25427716 |
| 2L | 21977895 | 21978241 | ../05_Mac | 28.28536 | 21978060 |
| 3R | 28659359 | 28660223 | ../05_Mac | 28.28102 | 28659536 |
| 3R | 6374390  | 6374814  | ../05_Mac | 28.27048 | 6374650  |
| 3R | 12346574 | 12347068 | ../05_Mac | 28.2567  | 12346900 |
| 2L | 4713185  | 4713985  | ../05_Mac | 28.22387 | 4713385  |
| 2R | 3548705  | 3549433  | ../05_Mac | 28.22387 | 3548902  |
| 3L | 16240000 | 16240344 | ../05_Mac | 28.22387 | 16240166 |
| 3R | 13618852 | 13619297 | ../05_Mac | 28.22387 | 13619006 |
| 3R | 28496134 | 28496420 | ../05_Mac | 28.22387 | 28496285 |
| 2L | 13248726 | 13249241 | ../05_Mac | 28.21424 | 13248949 |
| 3L | 3013392  | 3013742  | ../05_Mac | 28.21095 | 3013533  |
| 3L | 12428039 | 12428421 | ../05_Mac | 28.20965 | 12428183 |
| 2L | 13709863 | 13710235 | ../05_Mac | 28.20528 | 13710027 |
| 3R | 23833232 | 23833666 | ../05_Mac | 28.1876  | 23833477 |
| 3R | 27498092 | 27498458 | ../05_Mac | 28.17556 | 27498281 |
| 3L | 3808454  | 3808833  | ../05_Mac | 28.14925 | 3808623  |
| 2L | 14080748 | 14081087 | ../05_Mac | 28.14853 | 14080927 |
| 3L | 2963803  | 2964201  | ../05_Mac | 28.14853 | 2963990  |
| 3R | 14542175 | 14542543 | ../05_Mac | 28.11808 | 14542397 |
| 2R | 7017560  | 7017957  | ../05_Mac | 28.07983 | 7017767  |
| 2L | 8634902  | 8635306  | ../05_Mac | 28.07958 | 8635067  |
| 3L | 512203   | 512550   | ../05_Mac | 28.07688 | 512364   |
| 3R | 13133387 | 13133880 | ../05_Mac | 28.07688 | 13133622 |
| 2R | 9410258  | 9410594  | ../05_Mac | 28.02329 | 9410424  |
| 3R | 31196086 | 31196417 | ../05_Mac | 28.01551 | 31196252 |
| 3R | 28732656 | 28733077 | ../05_Mac | 28.00838 | 28732844 |
| 2L | 14524413 | 14524844 | ../05_Mac | 28.00594 | 14524596 |
| 2R | 7253960  | 7254266  | ../05_Mac | 27.9764  | 7254119  |
| 2R | 8206635  | 8207317  | ../05_Mac | 27.971   | 8206896  |
| 3R | 12042307 | 12042804 | ../05_Mac | 27.95524 | 12042513 |
| 2R | 11258077 | 11258503 | ../05_Mac | 27.95204 | 11258347 |
| 2R | 6026910  | 6027446  | ../05_Mac | 27.94875 | 6027184  |
| 2R | 17406275 | 17406815 | ../05_Mac | 27.94857 | 17406624 |
| 3L | 9213363  | 9213742  | ../05_Mac | 27.92244 | 9213518  |
| 3R | 8543103  | 8543465  | ../05_Mac | 27.91305 | 8543254  |
| 2L | 4888031  | 4888349  | ../05_Mac | 27.91299 | 4888167  |
| 3R | 31696590 | 31696925 | ../05_Mac | 27.89177 | 31696736 |
| 3L | 11361042 | 11361438 | ../05_Mac | 27.8913  | 11361153 |
| 3L | 21417478 | 21417868 | ../05_Mac | 27.87561 | 21417694 |
| 3L | 18235402 | 18235743 | ../05_Mac | 27.87086 | 18235566 |
| 3R | 13622740 | 13623147 | ../05_Mac | 27.87086 | 13622939 |

|          |          |          |           |          |          |
|----------|----------|----------|-----------|----------|----------|
| 3R       | 15085692 | 15086043 | ../05_Mac | 17.10913 | 15085879 |
| 3R       | 28680992 | 28681333 | ../05_Mac | 17.10259 | 28681179 |
| 3R       | 4652102  | 4652413  | ../05_Mac | 17.09645 | 4652235  |
| 3L       | 14843494 | 14843933 | ../05_Mac | 17.0533  | 14843735 |
| 3L       | 14128832 | 14129236 | ../05_Mac | 16.98924 | 14129025 |
| 2.11E+14 | 586      | 832      | ../05_Mac | 16.98448 | 763      |
| 2.11E+14 | 582      | 866      | ../05_Mac | 16.98448 | 683      |
| 2R       | 20460719 | 20461035 | ../05_Mac | 16.98448 | 20460866 |
| 3R       | 23434929 | 23435356 | ../05_Mac | 16.98448 | 23435111 |
| X        | 9070013  | 9070336  | ../05_Mac | 16.98448 | 9070178  |
| X        | 20923294 | 20923539 | ../05_Mac | 16.98448 | 20923398 |
| 3R       | 14013918 | 14014253 | ../05_Mac | 16.98071 | 14014094 |
| 3L       | 15507840 | 15508132 | ../05_Mac | 16.94868 | 15507945 |
| 3R       | 11949517 | 11949815 | ../05_Mac | 16.90656 | 11949693 |
| 2R       | 11903431 | 11903760 | ../05_Mac | 16.86289 | 11903595 |
| 2R       | 5803178  | 5803496  | ../05_Mac | 16.83895 | 5803316  |
| 3L       | 10639848 | 10640214 | ../05_Mac | 16.81246 | 10640002 |
| 2L       | 8137219  | 8137573  | ../05_Mac | 16.79323 | 8137414  |
| 3L       | 14664958 | 14665285 | ../05_Mac | 16.77786 | 14665150 |
| 3R       | 29963715 | 29964003 | ../05_Mac | 16.77786 | 29963856 |
| 3R       | 14836320 | 14836676 | ../05_Mac | 16.77443 | 14836487 |
| 2R       | 24036721 | 24037055 | ../05_Mac | 16.7687  | 24036873 |
| 3L       | 7342929  | 7343254  | ../05_Mac | 16.7655  | 7343112  |
| 2R       | 11115334 | 11115733 | ../05_Mac | 16.74798 | 11115545 |
| 3R       | 23888180 | 23888482 | ../05_Mac | 16.72891 | 23888356 |
| X        | 1773754  | 1774111  | ../05_Mac | 16.66524 | 1773942  |
| 3R       | 22487428 | 22487716 | ../05_Mac | 16.65049 | 22487582 |
| 3R       | 25202786 | 25203135 | ../05_Mac | 16.62371 | 25202999 |
| 3R       | 5320662  | 5321028  | ../05_Mac | 16.61209 | 5320849  |
| 3L       | 21702073 | 21702447 | ../05_Mac | 16.60347 | 21702307 |
| 3R       | 21355347 | 21355600 | ../05_Mac | 16.58555 | 21355451 |
| 2.11E+14 | 567      | 827      | ../05_Mac | 16.57042 | 635      |
| 2L       | 1677028  | 1677317  | ../05_Mac | 16.57042 | 1677186  |
| 2L       | 19676065 | 19676431 | ../05_Mac | 16.57042 | 19676231 |
| X        | 1383574  | 1383832  | ../05_Mac | 16.57042 | 1383691  |
| X        | 15223470 | 15223738 | ../05_Mac | 16.57042 | 15223636 |
| X        | 18748195 | 18748498 | ../05_Mac | 16.57042 | 18748324 |
| 2L       | 21898289 | 21899058 | ../05_Mac | 16.5382  | 21898551 |
| 3L       | 13229912 | 13230187 | ../05_Mac | 16.53658 | 13230034 |
| 3L       | 7251011  | 7251332  | ../05_Mac | 16.53381 | 7251156  |
| 3L       | 15924895 | 15925480 | ../05_Mac | 16.51547 | 15925051 |
| 3R       | 9824617  | 9825116  | ../05_Mac | 16.51481 | 9824928  |
| 2R       | 15688859 | 15689185 | ../05_Mac | 16.49779 | 15689007 |
| 3L       | 13032023 | 13032417 | ../05_Mac | 16.4775  | 13032204 |
| 3R       | 14333685 | 14334020 | ../05_Mac | 16.47117 | 14333849 |
| 3R       | 14926050 | 14926424 | ../05_Mac | 16.40816 | 14926244 |
| 2R       | 7122854  | 7123130  | ../05_Mac | 16.3546  | 7122974  |
| 2L       | 12579823 | 12580365 | ../05_Mac | 16.263   | 12580130 |
| 2L       | 20504308 | 20504735 | ../05_Mac | 16.263   | 20504485 |

|          |          |          |           |          |          |
|----------|----------|----------|-----------|----------|----------|
| 3L       | 3483338  | 3483774  | ../05_Mac | 27.86794 | 3483515  |
| 2R       | 24686235 | 24686653 | ../05_Mac | 27.8425  | 24686402 |
| 3R       | 27289345 | 27289656 | ../05_Mac | 27.80955 | 27289465 |
| 3L       | 21424635 | 21425029 | ../05_Mac | 27.80943 | 21424860 |
| 3R       | 5930660  | 5930977  | ../05_Mac | 27.79955 | 5930778  |
| 3R       | 28133709 | 28134063 | ../05_Mac | 27.79955 | 28133906 |
| 3R       | 31633294 | 31633850 | ../05_Mac | 27.79955 | 31633562 |
| X        | 16741508 | 16741876 | ../05_Mac | 27.79955 | 16741679 |
| 3R       | 28441199 | 28441503 | ../05_Mac | 27.78477 | 28441346 |
| 2L       | 7262535  | 7262958  | ../05_Mac | 27.77584 | 7262717  |
| 2L       | 19317720 | 19318018 | ../05_Mac | 27.75967 | 19317847 |
| 2L       | 16505489 | 16505985 | ../05_Mac | 27.75694 | 16505763 |
| 3R       | 28505668 | 28506013 | ../05_Mac | 27.7528  | 28505839 |
| 2R       | 18475546 | 18476014 | ../05_Mac | 27.73523 | 18475853 |
| 3R       | 28971444 | 28971796 | ../05_Mac | 27.73523 | 28971606 |
| 2R       | 15312641 | 15313041 | ../05_Mac | 27.7269  | 15312886 |
| 3R       | 19982178 | 19982995 | ../05_Mac | 27.7263  | 19982356 |
| 2R       | 21881456 | 21881800 | ../05_Mac | 27.69884 | 21881651 |
| 3L       | 4933160  | 4933865  | ../05_Mac | 27.69356 | 4933676  |
| 2R       | 20072904 | 20073307 | ../05_Mac | 27.65053 | 20073126 |
| 2L       | 21843302 | 21843782 | ../05_Mac | 27.63039 | 21843490 |
| 3R       | 30775811 | 30776175 | ../05_Mac | 27.61076 | 30775999 |
| 3R       | 16490639 | 16491318 | ../05_Mac | 27.60034 | 16491029 |
| 2L       | 20036702 | 20037127 | ../05_Mac | 27.59146 | 20036889 |
| 3L       | 21866646 | 21867086 | ../05_Mac | 27.59146 | 21866833 |
| 3R       | 15561311 | 15561768 | ../05_Mac | 27.55459 | 15561570 |
| 2R       | 17327007 | 17327378 | ../05_Mac | 27.53726 | 17327176 |
| 3L       | 7417361  | 7417872  | ../05_Mac | 27.53726 | 7417579  |
| 3L       | 6483242  | 6483678  | ../05_Mac | 27.52683 | 6483422  |
| 2R       | 7087632  | 7087960  | ../05_Mac | 27.51967 | 7087790  |
| 3L       | 21904197 | 21904810 | ../05_Mac | 27.514   | 21904420 |
| 3L       | 9212532  | 9212870  | ../05_Mac | 27.50299 | 9212705  |
| 2L       | 3620843  | 3621199  | ../05_Mac | 27.47985 | 3621023  |
| 3R       | 4752646  | 4753119  | ../05_Mac | 27.47108 | 4752824  |
| 3R       | 9476097  | 9476569  | ../05_Mac | 27.46658 | 9476347  |
| 2R       | 21672752 | 21673084 | ../05_Mac | 27.45632 | 21672931 |
| 2L       | 21081106 | 21081500 | ../05_Mac | 27.43638 | 21081292 |
| 2L       | 14158849 | 14159251 | ../05_Mac | 27.41255 | 14159064 |
| 3L       | 7576146  | 7576527  | ../05_Mac | 27.40137 | 7576341  |
| 2R       | 9900108  | 9900527  | ../05_Mac | 27.38874 | 9900345  |
| 2L       | 9887079  | 9887531  | ../05_Mac | 27.38021 | 9887332  |
| 2L       | 18092146 | 18092621 | ../05_Mac | 27.37744 | 18092413 |
| 2L       | 20477709 | 20477999 | ../05_Mac | 27.37744 | 20477802 |
| Unmapped | 60348    | 60691    | ../05_Mac | 27.37744 | 60545    |
| 2L       | 4561791  | 4562115  | ../05_Mac | 27.36947 | 4561904  |
| 2R       | 20604818 | 20605146 | ../05_Mac | 27.36826 | 20604978 |
| 3R       | 4727058  | 4727485  | ../05_Mac | 27.36826 | 4727314  |
| 2R       | 20214366 | 20214690 | ../05_Mac | 27.35925 | 20214536 |
| 3L       | 20101395 | 20101874 | ../05_Mac | 27.35925 | 20101647 |

|          |          |          |           |          |          |
|----------|----------|----------|-----------|----------|----------|
| 3R       | 19802078 | 19802519 | ../05_Mac | 16.263   | 19802354 |
| 3R       | 11967471 | 11967820 | ../05_Mac | 16.2487  | 11967660 |
| 2L       | 17661381 | 17661657 | ../05_Mac | 16.2336  | 17661506 |
| 2R       | 7887810  | 7888128  | ../05_Mac | 16.22017 | 7887997  |
| 2.11E+14 | 528      | 789      | ../05_Mac | 16.21119 | 658      |
| 2L       | 8862600  | 8862954  | ../05_Mac | 16.20778 | 8862757  |
| 3L       | 17253755 | 17254094 | ../05_Mac | 16.16883 | 17253869 |
| 2L       | 1872453  | 1872792  | ../05_Mac | 16.15991 | 1872661  |
| 2L       | 18262465 | 18262738 | ../05_Mac | 16.15991 | 18262619 |
| 2R       | 12213922 | 12214211 | ../05_Mac | 16.15991 | 12214087 |
| 3L       | 5089299  | 5089583  | ../05_Mac | 16.15991 | 5089412  |
| 3R       | 11344336 | 11344809 | ../05_Mac | 16.15991 | 11344589 |
| 3R       | 24456035 | 24456382 | ../05_Mac | 16.15991 | 24456198 |
| 2L       | 21804130 | 21804566 | ../05_Mac | 16.13231 | 21804404 |
| 3L       | 8175811  | 8176203  | ../05_Mac | 16.10707 | 8175981  |
| 3R       | 19966912 | 19967224 | ../05_Mac | 16.08493 | 19967063 |
| 3R       | 18052834 | 18053189 | ../05_Mac | 16.03832 | 18053013 |
| 3R       | 9492223  | 9492902  | ../05_Mac | 16.0285  | 9492396  |
| 2L       | 18475110 | 18475409 | ../05_Mac | 16.0225  | 18475283 |
| 3L       | 13154222 | 13154533 | ../05_Mac | 15.96463 | 13154384 |
| 3R       | 12337527 | 12337798 | ../05_Mac | 15.96419 | 12337638 |
| 2R       | 22957301 | 22958029 | ../05_Mac | 15.94569 | 22957477 |
| 2R       | 7942359  | 7942675  | ../05_Mac | 15.90019 | 7942538  |
| 3R       | 26255142 | 26255465 | ../05_Mac | 15.87302 | 26255332 |
| 2L       | 8976897  | 8977238  | ../05_Mac | 15.7983  | 8977073  |
| 3R       | 12152042 | 12152360 | ../05_Mac | 15.76379 | 12152190 |
| 3L       | 3078651  | 3079511  | ../05_Mac | 15.7567  | 3079046  |
| 2R       | 23786496 | 23786815 | ../05_Mac | 15.75309 | 23786650 |
| 3R       | 29295430 | 29295721 | ../05_Mac | 15.75309 | 29295542 |
| X        | 4875466  | 4875765  | ../05_Mac | 15.75309 | 4875613  |
| 2R       | 7812888  | 7813229  | ../05_Mac | 15.75307 | 7813039  |
| 3R       | 4952639  | 4952891  | ../05_Mac | 15.72064 | 4952721  |
| 2.11E+14 | 1051     | 1289     | ../05_Mac | 15.67128 | 1125     |
| 3R       | 14219060 | 14219402 | ../05_Mac | 15.67128 | 14219223 |
| 3R       | 26176792 | 26177287 | ../05_Mac | 15.61227 | 26177014 |
| 3L       | 17915055 | 17915471 | ../05_Mac | 15.58908 | 17915322 |
| 3R       | 4777970  | 4778218  | ../05_Mac | 15.57617 | 4778082  |
| 2R       | 10856942 | 10857208 | ../05_Mac | 15.55228 | 10857063 |
| 2R       | 9774134  | 9774427  | ../05_Mac | 15.41761 | 9774282  |
| X        | 7936366  | 7936671  | ../05_Mac | 15.41331 | 7936509  |
| 3L       | 9703347  | 9703658  | ../05_Mac | 15.36019 | 9703510  |
| 2L       | 2672892  | 2673264  | ../05_Mac | 15.35038 | 2673114  |
| 2L       | 17707148 | 17707441 | ../05_Mac | 15.35038 | 17707289 |
| 2R       | 11503388 | 11503638 | ../05_Mac | 15.35038 | 11503524 |
| 3L       | 5501313  | 5501661  | ../05_Mac | 15.35038 | 5501434  |
| 3L       | 22225709 | 22226029 | ../05_Mac | 15.35038 | 22225865 |
| X        | 8387619  | 8387940  | ../05_Mac | 15.35038 | 8387773  |
| X        | 21251062 | 21251315 | ../05_Mac | 15.35038 | 21251187 |
| 3L       | 4110268  | 4110630  | ../05_Mac | 15.33654 | 4110483  |

|    |          |          |           |          |          |
|----|----------|----------|-----------|----------|----------|
| 2L | 2658095  | 2658492  | ../05_Mac | 27.34959 | 2658251  |
| 2L | 1279797  | 1280092  | ../05_Mac | 27.34068 | 1279932  |
| 2L | 2597421  | 2597933  | ../05_Mac | 27.33767 | 2597699  |
| 2R | 16394705 | 16395024 | ../05_Mac | 27.3247  | 16394875 |
| X  | 23347938 | 23348161 | ../05_Mac | 27.3247  | 23348005 |
| 3R | 14660566 | 14660990 | ../05_Mac | 27.26699 | 14660763 |
| 3R | 13327482 | 13327906 | ../05_Mac | 27.26628 | 13327662 |
| 2L | 18318619 | 18319076 | ../05_Mac | 27.26495 | 18318866 |
| 3L | 9153665  | 9154142  | ../05_Mac | 27.25706 | 9153837  |
| 2L | 15395136 | 15395978 | ../05_Mac | 27.21528 | 15395787 |
| 2L | 21799513 | 21799861 | ../05_Mac | 27.21528 | 21799685 |
| 3L | 16243136 | 16243598 | ../05_Mac | 27.19502 | 16243334 |
| 3R | 6577787  | 6578220  | ../05_Mac | 27.19502 | 6577994  |
| 2R | 20258230 | 20258548 | ../05_Mac | 27.18593 | 20258380 |
| 3L | 14415125 | 14415493 | ../05_Mac | 27.18387 | 14415276 |
| 2L | 13951023 | 13951436 | ../05_Mac | 27.15788 | 13951230 |
| 2R | 9291215  | 9291516  | ../05_Mac | 27.15447 | 9291359  |
| 3R | 21700344 | 21700833 | ../05_Mac | 27.1192  | 21700684 |
| 3R | 11653733 | 11654102 | ../05_Mac | 27.1179  | 11653917 |
| 3L | 4727102  | 4727440  | ../05_Mac | 27.1039  | 4727281  |
| 2L | 9323989  | 9324694  | ../05_Mac | 27.07821 | 9324153  |
| 3L | 6865887  | 6866236  | ../05_Mac | 27.07821 | 6866060  |
| 3R | 25509331 | 25509885 | ../05_Mac | 27.05177 | 25509634 |
| 3L | 5736701  | 5737198  | ../05_Mac | 27.05144 | 5736882  |
| 2R | 24509989 | 24510290 | ../05_Mac | 27.03494 | 24510122 |
| 2R | 15176520 | 15177289 | ../05_Mac | 27.02764 | 15176734 |
| 3L | 2715277  | 2715572  | ../05_Mac | 27.02063 | 2715409  |
| 2R | 19265683 | 19266014 | ../05_Mac | 27.00601 | 19265863 |
| 3L | 8861799  | 8862502  | ../05_Mac | 27.00295 | 8862321  |
| 2L | 7916779  | 7917068  | ../05_Mac | 26.98999 | 7916906  |
| 4  | 868080   | 868499   | ../05_Mac | 26.98716 | 868271   |
| 3L | 7665276  | 7665706  | ../05_Mac | 26.97871 | 7665515  |
| 2L | 2335117  | 2335432  | ../05_Mac | 26.96604 | 2335268  |
| 3R | 10516606 | 10516947 | ../05_Mac | 26.96604 | 10516758 |
| 2L | 1349630  | 1349942  | ../05_Mac | 26.95769 | 1349775  |
| 2L | 1793787  | 1794188  | ../05_Mac | 26.95769 | 1793994  |
| 2L | 19854780 | 19855422 | ../05_Mac | 26.95769 | 19855248 |
| 2R | 23311852 | 23312217 | ../05_Mac | 26.95769 | 23312051 |
| 2R | 23829717 | 23830124 | ../05_Mac | 26.95769 | 23829879 |
| 3R | 2200557  | 2200815  | ../05_Mac | 26.95769 | 2200689  |
| 3R | 8592243  | 8592608  | ../05_Mac | 26.95769 | 8592431  |
| 3R | 27480610 | 27481101 | ../05_Mac | 26.95769 | 27480841 |
| X  | 3455115  | 3455402  | ../05_Mac | 26.95769 | 3455271  |
| X  | 22593292 | 22593994 | ../05_Mac | 26.95769 | 22593835 |
| 2R | 14319390 | 14319873 | ../05_Mac | 26.93407 | 14319582 |
| 2R | 23793936 | 23794404 | ../05_Mac | 26.93407 | 23794165 |
| 3L | 10525213 | 10525643 | ../05_Mac | 26.93407 | 10525392 |
| 2R | 15718638 | 15718978 | ../05_Mac | 26.93021 | 15718810 |
| 2L | 19593852 | 19594313 | ../05_Mac | 26.92408 | 19594119 |

|          |          |          |           |          |          |
|----------|----------|----------|-----------|----------|----------|
| 2L       | 5326671  | 5326906  | ../05_Mac | 15.32701 | 5326786  |
| 2L       | 5042736  | 5043061  | ../05_Mac | 15.23666 | 5042883  |
| 2R       | 7936004  | 7936262  | ../05_Mac | 15.21111 | 7936144  |
| 2R       | 20055640 | 20055977 | ../05_Mac | 15.18822 | 20055780 |
| 2L       | 18342320 | 18342900 | ../05_Mac | 15.16955 | 18342492 |
| 2R       | 21121422 | 21121782 | ../05_Mac | 15.15097 | 21121594 |
| 2L       | 13535603 | 13536017 | ../05_Mac | 15.11489 | 13535786 |
| 2L       | 10793418 | 10793771 | ../05_Mac | 15.1007  | 10793601 |
| 2R       | 21108048 | 21108340 | ../05_Mac | 15.00891 | 21108184 |
| 2L       | 751920   | 752245   | ../05_Mac | 14.96586 | 752083   |
| 2L       | 16201853 | 16202169 | ../05_Mac | 14.95113 | 16202027 |
| 2R       | 24484718 | 24485026 | ../05_Mac | 14.95113 | 24484835 |
| 3R       | 20371690 | 20371987 | ../05_Mac | 14.95113 | 20371810 |
| 2L       | 1185403  | 1185623  | ../05_Mac | 14.92025 | 1185520  |
| 3L       | 23005471 | 23005781 | ../05_Mac | 14.9104  | 23005613 |
| 3L       | 17040567 | 17040881 | ../05_Mac | 14.88426 | 17040726 |
| 3R       | 26264605 | 26265341 | ../05_Mac | 14.84807 | 26265227 |
| 2R       | 13808649 | 13809025 | ../05_Mac | 14.71948 | 13808832 |
| 3R       | 24531083 | 24531420 | ../05_Mac | 14.69877 | 24531271 |
| 3R       | 25646800 | 25647165 | ../05_Mac | 14.65412 | 25646990 |
| 2.11E+14 | 1169     | 1494     | ../05_Mac | 14.58906 | 1341     |
| 3R       | 12419248 | 12419497 | ../05_Mac | 14.58906 | 12419398 |
| 2L       | 10989222 | 10989662 | ../05_Mac | 14.58752 | 10989447 |
| 2L       | 21291931 | 21292280 | ../05_Mac | 14.55913 | 21292124 |
| 2.11E+14 | 710      | 956      | ../05_Mac | 14.55582 | 788      |
| 2R       | 11118306 | 11118774 | ../05_Mac | 14.55582 | 11118470 |
| 3L       | 10497395 | 10497643 | ../05_Mac | 14.55582 | 10497526 |
| 3R       | 7400860  | 7401143  | ../05_Mac | 14.55582 | 7401003  |
| 3R       | 26608856 | 26609450 | ../05_Mac | 14.55582 | 26609147 |
| 3R       | 28154216 | 28154640 | ../05_Mac | 14.55582 | 28154462 |
| 2R       | 6027661  | 6027972  | ../05_Mac | 14.50552 | 6027791  |
| 2R       | 10362342 | 10362699 | ../05_Mac | 14.49556 | 10362532 |
| 3L       | 13987730 | 13988164 | ../05_Mac | 14.48557 | 13987997 |
| 2R       | 24762831 | 24763124 | ../05_Mac | 14.45241 | 24762994 |
| 3L       | 3135540  | 3135835  | ../05_Mac | 14.4504  | 3135663  |
| 3L       | 18723231 | 18724000 | ../05_Mac | 14.44604 | 18723839 |
| 2R       | 17914742 | 17915120 | ../05_Mac | 14.44086 | 17914928 |
| 2L       | 17384565 | 17384917 | ../05_Mac | 14.42828 | 17384728 |
| 2R       | 15577621 | 15577910 | ../05_Mac | 14.40761 | 15577775 |
| 3R       | 20031118 | 20031831 | ../05_Mac | 14.39688 | 20031245 |
| 3R       | 25742798 | 25743262 | ../05_Mac | 14.36946 | 25743087 |
| 2L       | 17874075 | 17874370 | ../05_Mac | 14.36392 | 17874230 |
| X        | 19643151 | 19643416 | ../05_Mac | 14.35865 | 19643332 |
| 3R       | 7921898  | 7922170  | ../05_Mac | 14.31087 | 7922021  |
| 3R       | 5086692  | 5086942  | ../05_Mac | 14.25938 | 5086832  |
| X        | 488167   | 488516   | ../05_Mac | 14.25214 | 488330   |
| X        | 528143   | 528506   | ../05_Mac | 14.25214 | 528315   |
| 2R       | 17576158 | 17576457 | ../05_Mac | 14.23956 | 17576331 |
| 2R       | 11085942 | 11086440 | ../05_Mac | 14.21038 | 11086205 |

|    |          |          |           |          |          |
|----|----------|----------|-----------|----------|----------|
| 3R | 16032963 | 16033352 | ../05_Mac | 26.92408 | 16033264 |
| 3R | 30790254 | 30790608 | ../05_Mac | 26.91971 | 30790428 |
| 3R | 21514932 | 21515427 | ../05_Mac | 26.91104 | 21515172 |
| 2L | 17886381 | 17886780 | ../05_Mac | 26.88825 | 17886606 |
| 2L | 1730464  | 1731051  | ../05_Mac | 26.88374 | 1730713  |
| 2R | 18105852 | 18106193 | ../05_Mac | 26.88252 | 18106024 |
| 3L | 10741093 | 10741407 | ../05_Mac | 26.8622  | 10741261 |
| 3R | 29166420 | 29166757 | ../05_Mac | 26.84367 | 29166605 |
| 3L | 17467282 | 17467632 | ../05_Mac | 26.83202 | 17467491 |
| 2L | 21327478 | 21327979 | ../05_Mac | 26.8233  | 21327736 |
| 3L | 7270758  | 7271117  | ../05_Mac | 26.8233  | 7270932  |
| 2R | 10188219 | 10188596 | ../05_Mac | 26.80561 | 10188407 |
| 3R | 5553339  | 5553722  | ../05_Mac | 26.80315 | 5553524  |
| 3R | 20668857 | 20669332 | ../05_Mac | 26.79124 | 20669164 |
| 3L | 5578233  | 5578721  | ../05_Mac | 26.78282 | 5578494  |
| 2L | 17101084 | 17101413 | ../05_Mac | 26.77808 | 17101262 |
| 2L | 20638502 | 20638833 | ../05_Mac | 26.76149 | 20638670 |
| 2R | 10146936 | 10147300 | ../05_Mac | 26.76149 | 10147131 |
| 2L | 8360145  | 8360498  | ../05_Mac | 26.75938 | 8360338  |
| 3L | 19904064 | 19904404 | ../05_Mac | 26.75938 | 19904237 |
| 3R | 23396948 | 23397252 | ../05_Mac | 26.75106 | 23397076 |
| 3R | 10588104 | 10588531 | ../05_Mac | 26.75074 | 10588349 |
| 3R | 25677714 | 25677993 | ../05_Mac | 26.7297  | 25677866 |
| 3L | 12547204 | 12547611 | ../05_Mac | 26.72762 | 12547389 |
| 3R | 24879546 | 24879955 | ../05_Mac | 26.72373 | 24879718 |
| 2L | 5463017  | 5463395  | ../05_Mac | 26.72109 | 5463187  |
| 2R | 8502380  | 8502811  | ../05_Mac | 26.72109 | 8502567  |
| 2L | 1430768  | 1431105  | ../05_Mac | 26.69699 | 1430917  |
| 2R | 18431807 | 18432170 | ../05_Mac | 26.69278 | 18431940 |
| 3L | 4785952  | 4786311  | ../05_Mac | 26.67066 | 4786134  |
| 3R | 26187230 | 26187523 | ../05_Mac | 26.64275 | 26187387 |
| 2R | 19995250 | 19995781 | ../05_Mac | 26.63457 | 19995507 |
| 2L | 15572950 | 15573449 | ../05_Mac | 26.63216 | 15573202 |
| 3R | 16887690 | 16887962 | ../05_Mac | 26.63216 | 16887816 |
| 2L | 16744903 | 16745237 | ../05_Mac | 26.61903 | 16745051 |
| 2L | 3016811  | 3017171  | ../05_Mac | 26.61761 | 3016994  |
| 3R | 11467929 | 11468274 | ../05_Mac | 26.61602 | 11468119 |
| 2R | 12373770 | 12374166 | ../05_Mac | 26.60731 | 12373988 |
| 2L | 18384683 | 18385022 | ../05_Mac | 26.60404 | 18384850 |
| 3L | 5236899  | 5237245  | ../05_Mac | 26.59397 | 5237077  |
| 2L | 1825233  | 1825642  | ../05_Mac | 26.58518 | 1825451  |
| 2L | 15098824 | 15099162 | ../05_Mac | 26.58518 | 15098980 |
| 3R | 7555363  | 7555718  | ../05_Mac | 26.58518 | 7555559  |
| 3R | 17375321 | 17375621 | ../05_Mac | 26.56921 | 17375452 |
| 2L | 16452752 | 16453123 | ../05_Mac | 26.55597 | 16452893 |
| 2L | 755652   | 756146   | ../05_Mac | 26.54079 | 755995   |
| 2R | 4938049  | 4938403  | ../05_Mac | 26.54079 | 4938206  |
| 2R | 9366156  | 9366546  | ../05_Mac | 26.54079 | 9366314  |
| 2R | 9367608  | 9367981  | ../05_Mac | 26.54079 | 9367818  |

|          |          |          |           |          |          |
|----------|----------|----------|-----------|----------|----------|
| 2.11E+14 | 614      | 858      | ../05_Mac | 14.16475 | 790      |
| 2L       | 17650773 | 17651019 | ../05_Mac | 14.16475 | 17650875 |
| 2R       | 1776364  | 1776678  | ../05_Mac | 14.16475 | 1776498  |
| 3R       | 22819044 | 22819360 | ../05_Mac | 14.16475 | 22819228 |
| 3R       | 27407600 | 27407826 | ../05_Mac | 14.16475 | 27407678 |
| X        | 14486661 | 14486890 | ../05_Mac | 14.16475 | 14486782 |
| 3R       | 26701360 | 26701650 | ../05_Mac | 14.16257 | 26701505 |
| 3R       | 23650621 | 23650925 | ../05_Mac | 14.07945 | 23650764 |
| 3L       | 9863446  | 9863761  | ../05_Mac | 14.06721 | 9863591  |
| 2R       | 24138575 | 24138926 | ../05_Mac | 14.0105  | 24138743 |
| 2R       | 6682182  | 6682601  | ../05_Mac | 13.99595 | 6682338  |
| 3R       | 16139454 | 16139813 | ../05_Mac | 13.9825  | 16139648 |
| 3L       | 9510890  | 9511612  | ../05_Mac | 13.92667 | 9511367  |
| 2R       | 7944339  | 7944723  | ../05_Mac | 13.88459 | 7944484  |
| 3R       | 14752818 | 14753049 | ../05_Mac | 13.88459 | 14752961 |
| 2L       | 22311167 | 22311583 | ../05_Mac | 13.82548 | 22311392 |
| 3R       | 10372038 | 10372247 | ../05_Mac | 13.82258 | 10372175 |
| 2R       | 8216561  | 8216869  | ../05_Mac | 13.81728 | 8216707  |
| 2L       | 5232037  | 5232326  | ../05_Mac | 13.81479 | 5232199  |
| 2R       | 23386310 | 23386572 | ../05_Mac | 13.80558 | 23386419 |
| 2L       | 8060014  | 8060302  | ../05_Mac | 13.80375 | 8060162  |
| 2R       | 12153222 | 12153549 | ../05_Mac | 13.78342 | 12153378 |
| 3L       | 6385697  | 6386150  | ../05_Mac | 13.77743 | 6385862  |
| 3R       | 27659001 | 27659269 | ../05_Mac | 13.76071 | 27659175 |
| 2R       | 15655626 | 15655957 | ../05_Mac | 13.7337  | 15655764 |
| 2L       | 4338789  | 4339060  | ../05_Mac | 13.70352 | 4338954  |
| X        | 7734502  | 7734935  | ../05_Mac | 13.69981 | 7734713  |
| 3L       | 22759884 | 22760450 | ../05_Mac | 13.63562 | 22760299 |
| 3L       | 22347074 | 22347360 | ../05_Mac | 13.49728 | 22347243 |
| 2.11E+14 | 11042    | 11342    | ../05_Mac | 13.48351 | 11213    |
| 2L       | 5970701  | 5970936  | ../05_Mac | 13.46789 | 5970796  |
| 2L       | 5957134  | 5957454  | ../05_Mac | 13.45105 | 5957293  |
| 3R       | 9483896  | 9484201  | ../05_Mac | 13.44003 | 9484039  |
| 3R       | 22778345 | 22778580 | ../05_Mac | 13.43739 | 22778449 |
| 3R       | 30106846 | 30107224 | ../05_Mac | 13.4328  | 30106968 |
| 3R       | 16558765 | 16559103 | ../05_Mac | 13.42583 | 16558938 |
| 2R       | 15798193 | 15798511 | ../05_Mac | 13.42041 | 15798351 |
| 2R       | 2686317  | 2686592  | ../05_Mac | 13.39362 | 2686467  |
| 3L       | 23225332 | 23225844 | ../05_Mac | 13.39362 | 23225654 |
| 3R       | 6864986  | 6865263  | ../05_Mac | 13.39362 | 6865127  |
| X        | 17808264 | 17808564 | ../05_Mac | 13.39362 | 17808419 |
| 2R       | 8065634  | 8065870  | ../05_Mac | 13.34195 | 8065710  |
| 2R       | 23949193 | 23949458 | ../05_Mac | 13.25668 | 23949356 |
| 4        | 1318211  | 1318994  | ../05_Mac | 13.25493 | 1318733  |
| 3R       | 14346619 | 14346960 | ../05_Mac | 13.24754 | 14346848 |
| 2L       | 10555381 | 10556024 | ../05_Mac | 13.24238 | 10555586 |
| 3R       | 25047497 | 25047714 | ../05_Mac | 13.23769 | 25047620 |
| 2R       | 24940351 | 24940646 | ../05_Mac | 13.23608 | 24940519 |
| 2R       | 15623416 | 15623645 | ../05_Mac | 13.17269 | 15623561 |

|    |          |          |           |          |          |
|----|----------|----------|-----------|----------|----------|
| 2R | 10927166 | 10927484 | ../05_Mac | 26.54079 | 10927343 |
| 2R | 12068737 | 12069037 | ../05_Mac | 26.54079 | 12068892 |
| 2R | 18209904 | 18210268 | ../05_Mac | 26.54079 | 18210071 |
| 2R | 23316669 | 23317121 | ../05_Mac | 26.54079 | 23316899 |
| 3L | 1996559  | 1996870  | ../05_Mac | 26.54079 | 1996719  |
| 3L | 13339739 | 13340317 | ../05_Mac | 26.54079 | 13339934 |
| 3R | 12165514 | 12165804 | ../05_Mac | 26.54079 | 12165664 |
| 3R | 26301461 | 26301828 | ../05_Mac | 26.54079 | 26301676 |
| X  | 5175465  | 5175802  | ../05_Mac | 26.54079 | 5175635  |
| X  | 20915412 | 20915797 | ../05_Mac | 26.54079 | 20915602 |
| 2L | 545758   | 546189   | ../05_Mac | 26.52532 | 545974   |
| 2L | 8847176  | 8847600  | ../05_Mac | 26.52351 | 8847361  |
| 3R | 8555116  | 8555590  | ../05_Mac | 26.51731 | 8555362  |
| 3R | 16265053 | 16265357 | ../05_Mac | 26.50977 | 16265237 |
| 2R | 5850044  | 5850485  | ../05_Mac | 26.49987 | 5850218  |
| 3L | 7476849  | 7477565  | ../05_Mac | 26.49232 | 7477387  |
| 3R | 26901791 | 26902325 | ../05_Mac | 26.47682 | 26901977 |
| 2L | 7332978  | 7333348  | ../05_Mac | 26.40157 | 7333166  |
| 2L | 13705146 | 13705665 | ../05_Mac | 26.40157 | 13705445 |
| 2R | 22269427 | 22269751 | ../05_Mac | 26.39746 | 22269604 |
| 3R | 16185595 | 16186000 | ../05_Mac | 26.36954 | 16185788 |
| 2R | 5800885  | 5801599  | ../05_Mac | 26.36609 | 5801394  |
| 3R | 16009030 | 16009371 | ../05_Mac | 26.36609 | 16009212 |
| 2L | 12725860 | 12726219 | ../05_Mac | 26.36149 | 12726056 |
| 2R | 20418487 | 20418887 | ../05_Mac | 26.34538 | 20418703 |
| 3L | 25959846 | 25960316 | ../05_Mac | 26.34531 | 25960005 |
| 3L | 3308569  | 3308915  | ../05_Mac | 26.30508 | 3308718  |
| 3L | 17708616 | 17708934 | ../05_Mac | 26.26669 | 17708772 |
| 3R | 21533314 | 21533724 | ../05_Mac | 26.23744 | 21533511 |
| 3R | 21755006 | 21755349 | ../05_Mac | 26.23744 | 21755168 |
| 2R | 21202015 | 21202325 | ../05_Mac | 26.23063 | 21202169 |
| 2R | 12369231 | 12369602 | ../05_Mac | 26.22964 | 12369426 |
| 2R | 23043871 | 23044189 | ../05_Mac | 26.21147 | 23044010 |
| 2L | 19824127 | 19824681 | ../05_Mac | 26.19671 | 19824274 |
| 2R | 16880262 | 16880581 | ../05_Mac | 26.19671 | 16880401 |
| 3R | 30311759 | 30312064 | ../05_Mac | 26.19491 | 30311916 |
| 2L | 9384550  | 9384883  | ../05_Mac | 26.19212 | 9384722  |
| 3L | 19671407 | 19671745 | ../05_Mac | 26.18575 | 19671560 |
| 2R | 21840811 | 21841182 | ../05_Mac | 26.16045 | 21840987 |
| 3L | 5205378  | 5205728  | ../05_Mac | 26.16045 | 5205560  |
| 2R | 19116715 | 19117135 | ../05_Mac | 26.14978 | 19116945 |
| 3R | 6169372  | 6169745  | ../05_Mac | 26.14282 | 6169565  |
| 2L | 10600701 | 10601293 | ../05_Mac | 26.13545 | 10601025 |
| 3R | 20360433 | 20360794 | ../05_Mac | 26.13545 | 20360620 |
| 2L | 12965025 | 12965382 | ../05_Mac | 26.12598 | 12965198 |
| 2L | 19801001 | 19801570 | ../05_Mac | 26.12598 | 19801401 |
| 3L | 6037073  | 6037324  | ../05_Mac | 26.12598 | 6037214  |
| 3L | 24722896 | 24723264 | ../05_Mac | 26.12598 | 24723051 |
| 3R | 5950207  | 5951129  | ../05_Mac | 26.12598 | 5950372  |

|          |          |          |           |          |          |
|----------|----------|----------|-----------|----------|----------|
| 3R       | 15926644 | 15927167 | ../05_Mac | 13.14483 | 15926792 |
| 2L       | 20375468 | 20375782 | ../05_Mac | 13.14334 | 20375600 |
| 2R       | 19684013 | 19684363 | ../05_Mac | 13.11927 | 19684180 |
| 2L       | 6725676  | 6726007  | ../05_Mac | 13.08663 | 6725836  |
| 3L       | 22003827 | 22004102 | ../05_Mac | 13.06468 | 22003920 |
| 3R       | 17429595 | 17429906 | ../05_Mac | 13.03668 | 17429720 |
| 2.11E+14 | 937      | 1192     | ../05_Mac | 13.01392 | 1084     |
| 2.11E+14 | 976      | 1238     | ../05_Mac | 13.01392 | 1072     |
| 2L       | 11308164 | 11308491 | ../05_Mac | 13.01392 | 11308306 |
| 2R       | 19521275 | 19521682 | ../05_Mac | 13.01392 | 19521557 |
| 3R       | 13849782 | 13850055 | ../05_Mac | 13.01392 | 13849883 |
| 3R       | 28138906 | 28139179 | ../05_Mac | 13.01392 | 28139034 |
| 2R       | 14642234 | 14642570 | ../05_Mac | 12.94475 | 14642389 |
| 2L       | 9922001  | 9922258  | ../05_Mac | 12.93279 | 9922092  |
| 2R       | 19696425 | 19696926 | ../05_Mac | 12.87714 | 19696732 |
| 2R       | 13187730 | 13188042 | ../05_Mac | 12.857   | 13187872 |
| 2L       | 8033497  | 8033808  | ../05_Mac | 12.85067 | 8033625  |
| 2R       | 12754838 | 12755152 | ../05_Mac | 12.84056 | 12755000 |
| 2R       | 21531410 | 21532078 | ../05_Mac | 12.82986 | 21531560 |
| 2.11E+14 | 568      | 818      | ../05_Mac | 12.81167 | 754      |
| 2L       | 18551729 | 18552296 | ../05_Mac | 12.78106 | 18551983 |
| X        | 20525016 | 20525245 | ../05_Mac | 12.78069 | 20525122 |
| 3L       | 22114149 | 22114437 | ../05_Mac | 12.75824 | 22114293 |
| 3L       | 19783207 | 19783596 | ../05_Mac | 12.72496 | 19783342 |
| 2L       | 13456980 | 13457312 | ../05_Mac | 12.6634  | 13457135 |
| 2.11E+14 | 739      | 939      | ../05_Mac | 12.63829 | 872      |
| 2R       | 15458544 | 15459033 | ../05_Mac | 12.63829 | 15458876 |
| 2.11E+14 | 1116     | 1455     | ../05_Mac | 12.63173 | 1290     |
| 3L       | 17965297 | 17965702 | ../05_Mac | 12.60167 | 17965490 |
| 2R       | 20034993 | 20035250 | ../05_Mac | 12.57017 | 20035111 |
| 3R       | 5031072  | 5031366  | ../05_Mac | 12.56172 | 5031220  |
| 3L       | 7936878  | 7937170  | ../05_Mac | 12.54854 | 7936970  |
| 3R       | 25811900 | 25812126 | ../05_Mac | 12.52448 | 25812050 |
| 2R       | 21402074 | 21402740 | ../05_Mac | 12.52075 | 21402257 |
| 2L       | 17799876 | 17800275 | ../05_Mac | 12.49777 | 17800129 |
| 2L       | 4242670  | 4243017  | ../05_Mac | 12.48454 | 4242848  |
| 2.11E+14 | 655      | 977      | ../05_Mac | 12.47938 | 912      |
| 2R       | 21717286 | 21717595 | ../05_Mac | 12.47073 | 21717448 |
| 2L       | 17598979 | 17599380 | ../05_Mac | 12.46073 | 17599272 |
| 3L       | 3918064  | 3918556  | ../05_Mac | 12.42683 | 3918398  |
| 2L       | 19030866 | 19031186 | ../05_Mac | 12.42363 | 19031026 |
| 2L       | 14529493 | 14530015 | ../05_Mac | 12.37393 | 14529690 |
| 2R       | 10827239 | 10827559 | ../05_Mac | 12.36419 | 10827373 |
| 2L       | 3567698  | 3567937  | ../05_Mac | 12.3603  | 3567803  |
| 2R       | 20210398 | 20210854 | ../05_Mac | 12.30588 | 20210535 |
| 3R       | 29912437 | 29912735 | ../05_Mac | 12.29322 | 29912591 |
| 2.11E+14 | 720      | 1240     | ../05_Mac | 12.27791 | 1081     |
| 2L       | 8814053  | 8814286  | ../05_Mac | 12.2665  | 8814156  |
| 2R       | 8357589  | 8357880  | ../05_Mac | 12.2665  | 8357749  |

|    |          |          |           |          |          |
|----|----------|----------|-----------|----------|----------|
| 3R | 15741170 | 15741497 | ../05_Mac | 26.12598 | 15741330 |
| 3R | 20473587 | 20474425 | ../05_Mac | 26.12598 | 20473927 |
| 3R | 27461073 | 27461740 | ../05_Mac | 26.12598 | 27461315 |
| 3R | 28205686 | 28206062 | ../05_Mac | 26.12598 | 28205897 |
| 3R | 30713336 | 30713744 | ../05_Mac | 26.12598 | 30713556 |
| 3L | 6013753  | 6014101  | ../05_Mac | 26.12416 | 6013909  |
| 2L | 8626914  | 8627332  | ../05_Mac | 26.11553 | 8627057  |
| 3L | 1837379  | 1837781  | ../05_Mac | 26.11553 | 1837585  |
| 3L | 11407513 | 11407885 | ../05_Mac | 26.11553 | 11407662 |
| 3L | 20595723 | 20596066 | ../05_Mac | 26.08604 | 20595849 |
| 2R | 9909854  | 9910311  | ../05_Mac | 26.07141 | 9910042  |
| 3R | 6854544  | 6854977  | ../05_Mac | 26.06582 | 6854783  |
| 3L | 4008266  | 4008772  | ../05_Mac | 26.05638 | 4008574  |
| 3R | 6770279  | 6770785  | ../05_Mac | 25.99795 | 6770454  |
| 3R | 28751586 | 28752084 | ../05_Mac | 25.99795 | 28751847 |
| 2R | 2784969  | 2785377  | ../05_Mac | 25.99666 | 2785156  |
| 2L | 6817455  | 6817975  | ../05_Mac | 25.97432 | 6817807  |
| 2R | 19119827 | 19120301 | ../05_Mac | 25.96938 | 19120127 |
| 2R | 19980686 | 19981166 | ../05_Mac | 25.95669 | 19980938 |
| 2L | 18610945 | 18611271 | ../05_Mac | 25.95635 | 18611141 |
| 3R | 26420698 | 26421428 | ../05_Mac | 25.95256 | 26421230 |
| 3R | 16052243 | 16052659 | ../05_Mac | 25.93311 | 16052417 |
| 3L | 18364181 | 18364534 | ../05_Mac | 25.93132 | 18364371 |
| 3R | 22639178 | 22639761 | ../05_Mac | 25.93132 | 22639597 |
| 2L | 12135064 | 12135373 | ../05_Mac | 25.91843 | 12135238 |
| 2L | 14017547 | 14017863 | ../05_Mac | 25.89959 | 14017697 |
| 3L | 7811650  | 7812016  | ../05_Mac | 25.8854  | 7811826  |
| 3R | 19144746 | 19145113 | ../05_Mac | 25.86763 | 19144919 |
| 2R | 12504077 | 12504529 | ../05_Mac | 25.85804 | 12504346 |
| 3R | 20502261 | 20502675 | ../05_Mac | 25.85077 | 20502475 |
| 3R | 28277464 | 28277880 | ../05_Mac | 25.85077 | 28277631 |
| 2R | 18613684 | 18614005 | ../05_Mac | 25.84649 | 18613816 |
| 2L | 9657564  | 9658027  | ../05_Mac | 25.84304 | 9657840  |
| 2L | 8902602  | 8903265  | ../05_Mac | 25.83582 | 8903070  |
| 2L | 1048760  | 1049424  | ../05_Mac | 25.83122 | 1049277  |
| 3R | 18768794 | 18769134 | ../05_Mac | 25.83122 | 18768974 |
| 3L | 9919167  | 9919499  | ../05_Mac | 25.81341 | 9919332  |
| 2L | 19383514 | 19383885 | ../05_Mac | 25.80438 | 19383677 |
| 2R | 8211188  | 8211482  | ../05_Mac | 25.79559 | 8211330  |
| 3R | 12025269 | 12025606 | ../05_Mac | 25.79559 | 12025464 |
| 3L | 21481071 | 21481343 | ../05_Mac | 25.77806 | 21481217 |
| 3R | 6858853  | 6859175  | ../05_Mac | 25.77806 | 6859022  |
| 3R | 17601663 | 17602086 | ../05_Mac | 25.76433 | 17601830 |
| 2R | 10004057 | 10004403 | ../05_Mac | 25.76142 | 10004208 |
| 3R | 16665909 | 16666321 | ../05_Mac | 25.72956 | 16666099 |
| 3L | 7744337  | 7744676  | ../05_Mac | 25.71443 | 7744480  |
| 2L | 10042375 | 10042744 | ../05_Mac | 25.71364 | 10042614 |
| 2L | 12591203 | 12591637 | ../05_Mac | 25.71364 | 12591395 |
| 3L | 9146082  | 9146391  | ../05_Mac | 25.71364 | 9146272  |

|          |          |          |           |          |          |
|----------|----------|----------|-----------|----------|----------|
| X        | 9888185  | 9888486  | ../05_Mac | 12.2665  | 9888362  |
| 3R       | 20295543 | 20295749 | ../05_Mac | 12.24235 | 20295621 |
| 2L       | 401021   | 401257   | ../05_Mac | 12.23243 | 401143   |
| 3R       | 20024456 | 20024692 | ../05_Mac | 12.18945 | 20024581 |
| 3R       | 4862213  | 4862542  | ../05_Mac | 12.11889 | 4862336  |
| 2R       | 13614569 | 13614901 | ../05_Mac | 12.10085 | 13614710 |
| 3L       | 6310629  | 6310976  | ../05_Mac | 12.10085 | 6310799  |
| 3R       | 31860316 | 31860961 | ../05_Mac | 12.0864  | 31860686 |
| 3L       | 3052447  | 3052776  | ../05_Mac | 12.07286 | 3052658  |
| 2L       | 18947757 | 18948123 | ../05_Mac | 12.07138 | 18947931 |
| 3L       | 14611937 | 14612272 | ../05_Mac | 12.07138 | 14612153 |
| 3L       | 219143   | 219445   | ../05_Mac | 12.05211 | 219273   |
| 3R       | 5393874  | 5394228  | ../05_Mac | 12.05211 | 5394072  |
| 2.11E+14 | 1297     | 1496     | ../05_Mac | 12.01254 | 1374     |
| 2L       | 7211157  | 7211481  | ../05_Mac | 11.95455 | 7211310  |
| 2L       | 3805676  | 3805947  | ../05_Mac | 11.92376 | 3805795  |
| 3R       | 19177467 | 19177723 | ../05_Mac | 11.92178 | 19177603 |
| 2L       | 15483410 | 15483694 | ../05_Mac | 11.89899 | 15483539 |
| 2R       | 22979814 | 22980073 | ../05_Mac | 11.89899 | 22979980 |
| 3L       | 946314   | 946631   | ../05_Mac | 11.89899 | 946447   |
| 3L       | 18164763 | 18165067 | ../05_Mac | 11.89899 | 18164878 |
| 3R       | 20337790 | 20338074 | ../05_Mac | 11.89899 | 20337934 |
| 3R       | 28934349 | 28934670 | ../05_Mac | 11.89899 | 28934489 |
| X        | 12139541 | 12139932 | ../05_Mac | 11.89899 | 12139701 |
| 2L       | 17627130 | 17627957 | ../05_Mac | 11.89581 | 17627302 |
| 2L       | 22019688 | 22020039 | ../05_Mac | 11.84652 | 22019847 |
| 3L       | 4377690  | 4377990  | ../05_Mac | 11.79825 | 4377861  |
| 3L       | 12099274 | 12099685 | ../05_Mac | 11.79509 | 12099519 |
| 3L       | 22251830 | 22252207 | ../05_Mac | 11.78297 | 22252032 |
| 3L       | 22267224 | 22267544 | ../05_Mac | 11.76904 | 22267430 |
| 2R       | 12210409 | 12211092 | ../05_Mac | 11.74898 | 12210619 |
| 2.11E+14 | 589      | 859      | ../05_Mac | 11.7038  | 768      |
| 2L       | 9612238  | 9612538  | ../05_Mac | 11.65647 | 9612364  |
| 3R       | 9564227  | 9564459  | ../05_Mac | 11.6139  | 9564381  |
| X        | 4635481  | 4635722  | ../05_Mac | 11.60826 | 4635637  |
| 2R       | 11080588 | 11080952 | ../05_Mac | 11.60408 | 11080781 |
| 2L       | 19885788 | 19886142 | ../05_Mac | 11.56896 | 19885959 |
| 2R       | 9583757  | 9584048  | ../05_Mac | 11.54421 | 9583880  |
| 2L       | 22498681 | 22498883 | ../05_Mac | 11.53563 | 22498721 |
| 2R       | 7704500  | 7705066  | ../05_Mac | 11.53563 | 7704635  |
| 3L       | 12995132 | 12995387 | ../05_Mac | 11.53563 | 12995291 |
| 2L       | 9449900  | 9450226  | ../05_Mac | 11.40718 | 9450037  |
| 3L       | 6699318  | 6699568  | ../05_Mac | 11.37862 | 6699474  |
| 2R       | 18548318 | 18548524 | ../05_Mac | 11.37073 | 18548403 |
| 2R       | 11295268 | 11295503 | ../05_Mac | 11.36148 | 11295397 |
| 2L       | 2768721  | 2769028  | ../05_Mac | 11.25404 | 2768901  |
| 3R       | 5523016  | 5523298  | ../05_Mac | 11.22261 | 5523188  |
| 2L       | 6249453  | 6249719  | ../05_Mac | 11.17648 | 6249583  |
| 2R       | 23141353 | 23141703 | ../05_Mac | 11.17648 | 23141459 |

|    |          |          |           |          |          |
|----|----------|----------|-----------|----------|----------|
| 3L | 14349069 | 14349378 | ../05_Mac | 25.71364 | 14349231 |
| 3L | 22571020 | 22571458 | ../05_Mac | 25.71364 | 22571237 |
| 3R | 1995336  | 1995616  | ../05_Mac | 25.71364 | 1995491  |
| 3R | 28275642 | 28276043 | ../05_Mac | 25.71364 | 28275802 |
| X  | 11533286 | 11533640 | ../05_Mac | 25.71364 | 11533477 |
| X  | 16860910 | 16861252 | ../05_Mac | 25.71364 | 16861066 |
| 2R | 12604507 | 12604869 | ../05_Mac | 25.69765 | 12604699 |
| 3R | 20609926 | 20610593 | ../05_Mac | 25.68692 | 20610100 |
| 2L | 11373642 | 11373981 | ../05_Mac | 25.68442 | 11373799 |
| 2L | 14561576 | 14562092 | ../05_Mac | 25.68442 | 14561809 |
| 3R | 19362168 | 19362405 | ../05_Mac | 25.6628  | 19362290 |
| 3L | 5187867  | 5188295  | ../05_Mac | 25.66098 | 5188096  |
| 3L | 13319909 | 13320301 | ../05_Mac | 25.65561 | 13320170 |
| 2R | 13314256 | 13314663 | ../05_Mac | 25.60794 | 13314448 |
| 3R | 6701163  | 6701590  | ../05_Mac | 25.60794 | 6701356  |
| 3L | 11784587 | 11785392 | ../05_Mac | 25.60545 | 11784788 |
| 3R | 6252353  | 6253114  | ../05_Mac | 25.5987  | 6252947  |
| 3R | 9854248  | 9854815  | ../05_Mac | 25.59524 | 9854633  |
| 3R | 31202007 | 31202307 | ../05_Mac | 25.59524 | 31202165 |
| 2L | 7711856  | 7712253  | ../05_Mac | 25.58813 | 7712009  |
| 2L | 7897590  | 7897923  | ../05_Mac | 25.58479 | 7897778  |
| 3R | 5493054  | 5493665  | ../05_Mac | 25.57926 | 5493220  |
| 3L | 21357781 | 21358450 | ../05_Mac | 25.56608 | 21358288 |
| 2L | 4324108  | 4324666  | ../05_Mac | 25.53505 | 4324379  |
| 2L | 300833   | 301228   | ../05_Mac | 25.53257 | 301047   |
| 2R | 6602393  | 6602710  | ../05_Mac | 25.53075 | 6602558  |
| 2L | 19302535 | 19303075 | ../05_Mac | 25.5178  | 19302855 |
| 3L | 13457497 | 13457881 | ../05_Mac | 25.5178  | 13457685 |
| 2R | 10743384 | 10743836 | ../05_Mac | 25.51614 | 10743578 |
| 3L | 1878677  | 1879030  | ../05_Mac | 25.50874 | 1878815  |
| 3R | 19639095 | 19639483 | ../05_Mac | 25.48395 | 19639272 |
| 2R | 24918548 | 24918891 | ../05_Mac | 25.4805  | 24918736 |
| 3L | 9311411  | 9311949  | ../05_Mac | 25.46981 | 9311677  |
| 3R | 6194681  | 6195117  | ../05_Mac | 25.46981 | 6194891  |
| 2L | 11626797 | 11627124 | ../05_Mac | 25.45496 | 11626968 |
| 3L | 27147246 | 27147664 | ../05_Mac | 25.45496 | 27147478 |
| 3R | 13954010 | 13954396 | ../05_Mac | 25.45496 | 13954206 |
| 3R | 20754133 | 20754461 | ../05_Mac | 25.45496 | 20754288 |
| 3R | 23571586 | 23571927 | ../05_Mac | 25.45496 | 23571750 |
| 2L | 9360306  | 9360886  | ../05_Mac | 25.44501 | 9360554  |
| 2L | 12399155 | 12399438 | ../05_Mac | 25.43874 | 12399292 |
| 3L | 22584331 | 22584797 | ../05_Mac | 25.4351  | 22584533 |
| 2L | 10008289 | 10008667 | ../05_Mac | 25.41247 | 10008495 |
| 2L | 15323036 | 15323571 | ../05_Mac | 25.4057  | 15323354 |
| 2R | 17234497 | 17234924 | ../05_Mac | 25.4057  | 17234709 |
| 2L | 11571244 | 11571563 | ../05_Mac | 25.40045 | 11571407 |
| 2L | 5822422  | 5823300  | ../05_Mac | 25.39812 | 5823104  |
| 3R | 27334906 | 27335630 | ../05_Mac | 25.39672 | 27335462 |
| 3R | 6414232  | 6414665  | ../05_Mac | 25.37804 | 6414404  |



|          |          |          |           |          |          |
|----------|----------|----------|-----------|----------|----------|
| 3L       | 4861138  | 4861456  | ../05_Mac | 11.17648 | 4861267  |
| 3L       | 9318266  | 9318534  | ../05_Mac | 11.1724  | 9318366  |
| 3L       | 10952662 | 10952960 | ../05_Mac | 11.1724  | 10952820 |
| 3L       | 17295063 | 17295496 | ../05_Mac | 11.1724  | 17295215 |
| 3L       | 19001855 | 19002201 | ../05_Mac | 11.14795 | 19002029 |
| X        | 6295328  | 6295633  | ../05_Mac | 11.12663 | 6295467  |
| 3L       | 16711661 | 16712203 | ../05_Mac | 11.11557 | 16712090 |
| 3R       | 26531527 | 26531838 | ../05_Mac | 11.0906  | 26531700 |
| 2.11E+14 | 533      | 870      | ../05_Mac | 11.08347 | 716      |
| 2L       | 16607244 | 16607531 | ../05_Mac | 11.06155 | 16607414 |
| 3R       | 12635037 | 12635385 | ../05_Mac | 11.02776 | 12635240 |
| 2L       | 609008   | 609276   | ../05_Mac | 11.00338 | 609136   |
| 3R       | 24388280 | 24388542 | ../05_Mac | 10.9772  | 24388430 |
| 3L       | 8479822  | 8480099  | ../05_Mac | 10.88947 | 8479993  |
| 2R       | 8994592  | 8994851  | ../05_Mac | 10.88929 | 8994691  |
| 3L       | 13268113 | 13268476 | ../05_Mac | 10.85985 | 13268264 |
| 2.11E+14 | 1291     | 1558     | ../05_Mac | 10.8545  | 1423     |
| 3L       | 12498176 | 12498521 | ../05_Mac | 10.84816 | 12498355 |
| 3L       | 13988328 | 13988895 | ../05_Mac | 10.82183 | 13988715 |
| 2R       | 19675957 | 19676358 | ../05_Mac | 10.76624 | 19676180 |
| 3L       | 3425428  | 3425774  | ../05_Mac | 10.72295 | 3425622  |
| 2R       | 15474642 | 15475284 | ../05_Mac | 10.69551 | 15474912 |
| 2L       | 15263100 | 15263505 | ../05_Mac | 10.69004 | 15263368 |
| 3L       | 23346212 | 23346796 | ../05_Mac | 10.66886 | 23346391 |
| 2L       | 20751935 | 20752223 | ../05_Mac | 10.6662  | 20752064 |
| 2R       | 9585607  | 9585864  | ../05_Mac | 10.65435 | 9585746  |
| 2L       | 3399795  | 3400074  | ../05_Mac | 10.64557 | 3399905  |
| 3R       | 25970292 | 25970776 | ../05_Mac | 10.64537 | 25970583 |
| 3L       | 20219209 | 20219500 | ../05_Mac | 10.59748 | 20219339 |
| 3R       | 17370876 | 17371128 | ../05_Mac | 10.59123 | 17371001 |
| X        | 5907976  | 5908206  | ../05_Mac | 10.56297 | 5908095  |
| 3R       | 8190677  | 8190995  | ../05_Mac | 10.50972 | 8190849  |
| 2R       | 17185631 | 17185925 | ../05_Mac | 10.49493 | 17185801 |
| 2L       | 3490978  | 3491264  | ../05_Mac | 10.473   | 3491143  |
| 2.11E+14 | 1975     | 2239     | ../05_Mac | 10.47074 | 2133     |
| 2L       | 784223   | 784556   | ../05_Mac | 10.47074 | 784404   |
| 3R       | 26625711 | 26625910 | ../05_Mac | 10.47074 | 26625790 |
| 3R       | 27168761 | 27169030 | ../05_Mac | 10.47074 | 27168892 |
| 2R       | 14625710 | 14626023 | ../05_Mac | 10.45445 | 14625839 |
| 2L       | 9797311  | 9797595  | ../05_Mac | 10.45144 | 9797416  |
| 2L       | 13633054 | 13633420 | ../05_Mac | 10.30559 | 13633231 |
| 2R       | 17464008 | 17464308 | ../05_Mac | 10.27518 | 17464144 |
| 2R       | 13671656 | 13672117 | ../05_Mac | 10.27371 | 13671833 |
| 3R       | 29980049 | 29980298 | ../05_Mac | 10.25582 | 29980177 |
| 2R       | 7641547  | 7641811  | ../05_Mac | 10.22152 | 7641674  |
| 3R       | 6857584  | 6857825  | ../05_Mac | 10.22152 | 6857695  |
| 2R       | 6991885  | 6992231  | ../05_Mac | 10.2141  | 6992067  |
| 2L       | 16289671 | 16289875 | ../05_Mac | 10.1708  | 16289791 |
| X        | 377541   | 377794   | ../05_Mac | 10.12389 | 377684   |

|    |          |          |           |          |          |
|----|----------|----------|-----------|----------|----------|
| 3L | 23765715 | 23766105 | ../05_Mac | 25.37147 | 23765929 |
| 3R | 6903452  | 6903786  | ../05_Mac | 25.37147 | 6903617  |
| 3L | 17163380 | 17163722 | ../05_Mac | 25.34292 | 17163523 |
| 3R | 24402284 | 24402643 | ../05_Mac | 25.31182 | 24402481 |
| 3R | 13371194 | 13371535 | ../05_Mac | 25.30574 | 13371349 |
| 2L | 1451340  | 1451636  | ../05_Mac | 25.30383 | 1451464  |
| 2L | 21936673 | 21936981 | ../05_Mac | 25.30383 | 21936823 |
| 2R | 3174750  | 3175083  | ../05_Mac | 25.30383 | 3174934  |
| 2R | 14656173 | 14656519 | ../05_Mac | 25.30383 | 14656334 |
| 2R | 20444254 | 20444756 | ../05_Mac | 25.30383 | 20444515 |
| 3L | 15168723 | 15169065 | ../05_Mac | 25.30383 | 15168872 |
| 3R | 6522737  | 6523078  | ../05_Mac | 25.30383 | 6522921  |
| 3R | 13526788 | 13527220 | ../05_Mac | 25.30383 | 13526924 |
| 2L | 16593820 | 16594093 | ../05_Mac | 25.2971  | 16593946 |
| 3R | 22286758 | 22287102 | ../05_Mac | 25.29638 | 22286934 |
| 3L | 5893217  | 5893575  | ../05_Mac | 25.28387 | 5893402  |
| 3L | 7252934  | 7253516  | ../05_Mac | 25.27418 | 7253095  |
| 2L | 11745684 | 11745974 | ../05_Mac | 25.26753 | 11745836 |
| 3R | 28132471 | 28133001 | ../05_Mac | 25.26753 | 28132776 |
| 3R | 7598193  | 7598584  | ../05_Mac | 25.25349 | 7598390  |
| 3R | 31761598 | 31762034 | ../05_Mac | 25.25349 | 31761773 |
| 2L | 12697672 | 12698007 | ../05_Mac | 25.24017 | 12697847 |
| 3L | 11584494 | 11584924 | ../05_Mac | 25.23558 | 11584691 |
| 3R | 28757526 | 28757856 | ../05_Mac | 25.23558 | 28757691 |
| 2L | 8228579  | 8229049  | ../05_Mac | 25.19913 | 8228742  |
| 2R | 17131975 | 17132505 | ../05_Mac | 25.1637  | 17132317 |
| 2R | 19256143 | 19256786 | ../05_Mac | 25.15053 | 19256618 |
| 3R | 16495058 | 16495442 | ../05_Mac | 25.15053 | 16495244 |
| 3L | 14746446 | 14747099 | ../05_Mac | 25.14961 | 14746840 |
| 2R | 5894290  | 5894858  | ../05_Mac | 25.14898 | 5894681  |
| 2L | 18098767 | 18099206 | ../05_Mac | 25.13435 | 18098938 |
| 3L | 5620641  | 5621088  | ../05_Mac | 25.13435 | 5620890  |
| 2L | 5391787  | 5392159  | ../05_Mac | 25.10748 | 5391979  |
| 2L | 11690506 | 11690953 | ../05_Mac | 25.10534 | 11690753 |
| 2L | 17758170 | 17758569 | ../05_Mac | 25.08323 | 17758374 |
| 3R | 31477393 | 31477855 | ../05_Mac | 25.04074 | 31477695 |
| 3L | 19674090 | 19674526 | ../05_Mac | 25.0203  | 19674242 |
| 2R | 9282051  | 9282346  | ../05_Mac | 25.00642 | 9282204  |
| 2R | 14012736 | 14013163 | ../05_Mac | 24.99757 | 14012989 |
| 3R | 21006637 | 21006955 | ../05_Mac | 24.99585 | 21006813 |
| 3R | 23078421 | 23078800 | ../05_Mac | 24.9928  | 23078578 |
| 2R | 9099418  | 9099983  | ../05_Mac | 24.98229 | 9099601  |
| 3R | 20608127 | 20608572 | ../05_Mac | 24.97637 | 20608397 |
| 2L | 13538449 | 13538881 | ../05_Mac | 24.97606 | 13538660 |
| 3L | 21450548 | 21450909 | ../05_Mac | 24.97606 | 21450717 |
| 2L | 6194114  | 6194622  | ../05_Mac | 24.96169 | 6194438  |
| 2R | 9391873  | 9392289  | ../05_Mac | 24.96169 | 9392108  |
| 2R | 20468086 | 20468440 | ../05_Mac | 24.96169 | 20468268 |
| 3L | 6382293  | 6382744  | ../05_Mac | 24.94411 | 6382516  |

|    |          |          |           |          |          |
|----|----------|----------|-----------|----------|----------|
| 3L | 16969476 | 16969873 | ../05_Mac | 10.101   | 16969779 |
| 3R | 24977184 | 24977508 | ../05_Mac | 10.08224 | 24977417 |

|          |          |          |           |          |          |
|----------|----------|----------|-----------|----------|----------|
| 2R       | 9590116  | 9590412  | ../05_Mac | 24.941   | 9590271  |
| 3R       | 9720532  | 9721027  | ../05_Mac | 24.941   | 9720854  |
| 3L       | 8849758  | 8850113  | ../05_Mac | 24.91216 | 8849918  |
| 3R       | 9009197  | 9010034  | ../05_Mac | 24.91102 | 9009875  |
| 2L       | 614240   | 614555   | ../05_Mac | 24.89635 | 614409   |
| 2L       | 1046682  | 1047062  | ../05_Mac | 24.89635 | 1046843  |
| 2R       | 20908442 | 20909179 | ../05_Mac | 24.89635 | 20909007 |
| 3L       | 12604908 | 12605376 | ../05_Mac | 24.89635 | 12605093 |
| 3L       | 22632349 | 22632793 | ../05_Mac | 24.89635 | 22632605 |
| 3R       | 28252913 | 28253255 | ../05_Mac | 24.89635 | 28253041 |
| 3R       | 28569741 | 28570061 | ../05_Mac | 24.89635 | 28569908 |
| 3R       | 31982674 | 31982955 | ../05_Mac | 24.89635 | 31982865 |
| Unmapped | 57336    | 57661    | ../05_Mac | 24.89635 | 57471    |
| X        | 21469709 | 21470011 | ../05_Mac | 24.89635 | 21469851 |
| X        | 21563556 | 21563830 | ../05_Mac | 24.89635 | 21563705 |
| 2L       | 3505820  | 3506414  | ../05_Mac | 24.88454 | 3506227  |
| 3R       | 21070851 | 21071204 | ../05_Mac | 24.88454 | 21071044 |
| 3R       | 26529619 | 26529967 | ../05_Mac | 24.88097 | 26529792 |
| 2R       | 20488703 | 20489680 | ../05_Mac | 24.87756 | 20488947 |
| 3L       | 8972357  | 8972924  | ../05_Mac | 24.86136 | 8972746  |
| 2L       | 8065175  | 8065557  | ../05_Mac | 24.85304 | 8065386  |
| 2L       | 12613169 | 12613455 | ../05_Mac | 24.8466  | 12613284 |
| 3R       | 4840846  | 4841139  | ../05_Mac | 24.8466  | 4840979  |
| 3R       | 10639571 | 10640084 | ../05_Mac | 24.8466  | 10639765 |
| 3R       | 27816328 | 27816713 | ../05_Mac | 24.8466  | 27816540 |
| 3R       | 22395663 | 22396038 | ../05_Mac | 24.84214 | 22395851 |
| 3R       | 17800063 | 17800465 | ../05_Mac | 24.83749 | 17800212 |
| 3R       | 17986464 | 17986740 | ../05_Mac | 24.80528 | 17986567 |
| 3R       | 29038003 | 29038306 | ../05_Mac | 24.80271 | 29038152 |
| 2L       | 2642939  | 2643403  | ../05_Mac | 24.78776 | 2643111  |
| 3R       | 14823848 | 14824286 | ../05_Mac | 24.77784 | 14824006 |
| 2L       | 18310799 | 18311166 | ../05_Mac | 24.77421 | 18311005 |
| 3R       | 19255874 | 19256321 | ../05_Mac | 24.77328 | 19256057 |
| 2R       | 23498099 | 23498562 | ../05_Mac | 24.76349 | 23498363 |
| 2L       | 19458763 | 19459099 | ../05_Mac | 24.73218 | 19458952 |
| 3R       | 11742671 | 11743021 | ../05_Mac | 24.73193 | 11742821 |
| 2R       | 12688337 | 12688651 | ../05_Mac | 24.72738 | 12688492 |
| X        | 10385706 | 10386043 | ../05_Mac | 24.71613 | 10385867 |
| 2L       | 11054566 | 11054929 | ../05_Mac | 24.67849 | 11054745 |
| 3R       | 31271175 | 31272173 | ../05_Mac | 24.67683 | 31271877 |
| 3L       | 20100124 | 20100482 | ../05_Mac | 24.6734  | 20100310 |
| 3R       | 22280220 | 22280575 | ../05_Mac | 24.6485  | 22280383 |
| 3L       | 10006775 | 10007121 | ../05_Mac | 24.6446  | 10006956 |
| 3R       | 14173704 | 14174057 | ../05_Mac | 24.6446  | 14173875 |
| 3L       | 3394431  | 3394752  | ../05_Mac | 24.6428  | 3394534  |
| 2L       | 10273448 | 10273788 | ../05_Mac | 24.63405 | 10273605 |
| 3L       | 11951621 | 11951971 | ../05_Mac | 24.62702 | 11951803 |
| 3R       | 17835313 | 17835696 | ../05_Mac | 24.62702 | 17835489 |
| 3L       | 22176389 | 22177338 | ../05_Mac | 24.59166 | 22176672 |

|    |          |          |           |          |          |
|----|----------|----------|-----------|----------|----------|
| 3R | 16594017 | 16594524 | ../05_Mac | 24.58795 | 16594197 |
| 3R | 26333564 | 26333934 | ../05_Mac | 24.58795 | 26333738 |
| 2R | 20445973 | 20446520 | ../05_Mac | 24.56524 | 20446382 |
| 3L | 6861806  | 6862425  | ../05_Mac | 24.56025 | 6862275  |
| 2R | 8769098  | 8769538  | ../05_Mac | 24.52662 | 8769279  |
| 3R | 17568108 | 17568460 | ../05_Mac | 24.52662 | 17568272 |
| 2R | 11875381 | 11875741 | ../05_Mac | 24.5208  | 11875546 |
| 2R | 12974814 | 12975973 | ../05_Mac | 24.5208  | 12975753 |
| 2R | 5247684  | 5248060  | ../05_Mac | 24.51428 | 5247897  |
| 3L | 19249784 | 19250107 | ../05_Mac | 24.5103  | 19249938 |
| 3L | 12944202 | 12944733 | ../05_Mac | 24.50802 | 12944472 |
| 2L | 17279936 | 17280522 | ../05_Mac | 24.50583 | 17280235 |
| 2R | 11527812 | 11528591 | ../05_Mac | 24.49648 | 11528348 |
| 2L | 20047905 | 20048303 | ../05_Mac | 24.49274 | 20048084 |
| 2L | 962012   | 962467   | ../05_Mac | 24.49131 | 962217   |
| 2L | 12965482 | 12965933 | ../05_Mac | 24.49131 | 12965679 |
| 2L | 18908693 | 18909100 | ../05_Mac | 24.49131 | 18908866 |
| 2R | 6437028  | 6437345  | ../05_Mac | 24.49131 | 6437178  |
| 2R | 24274234 | 24274776 | ../05_Mac | 24.49131 | 24274636 |
| 3L | 3915539  | 3915765  | ../05_Mac | 24.49131 | 3915673  |
| 3L | 14857759 | 14858076 | ../05_Mac | 24.49131 | 14857935 |
| 3R | 1873762  | 1874078  | ../05_Mac | 24.49131 | 1873930  |
| 3R | 4615101  | 4615531  | ../05_Mac | 24.49131 | 4615231  |
| 3R | 6716706  | 6717027  | ../05_Mac | 24.49131 | 6716886  |
| 3R | 13164058 | 13164374 | ../05_Mac | 24.49131 | 13164211 |
| 3R | 15153935 | 15154695 | ../05_Mac | 24.49131 | 15154505 |
| 3R | 28260990 | 28261399 | ../05_Mac | 24.49131 | 28261209 |
| X  | 2418174  | 2418590  | ../05_Mac | 24.49131 | 2418364  |
| 2R | 18030801 | 18031079 | ../05_Mac | 24.49095 | 18030954 |
| 2R | 20267842 | 20268161 | ../05_Mac | 24.48849 | 20268010 |
| 3R | 8971392  | 8971769  | ../05_Mac | 24.48849 | 8971591  |
| 3L | 11920221 | 11920971 | ../05_Mac | 24.47558 | 11920379 |
| 2L | 322813   | 323130   | ../05_Mac | 24.4557  | 322983   |
| 3L | 13238667 | 13238926 | ../05_Mac | 24.45376 | 13238785 |
| 3L | 11071687 | 11072075 | ../05_Mac | 24.44289 | 11071903 |
| 3R | 31746893 | 31747391 | ../05_Mac | 24.4361  | 31747036 |
| 3L | 16176254 | 16176544 | ../05_Mac | 24.42763 | 16176411 |
| 3R | 23917909 | 23918259 | ../05_Mac | 24.4229  | 23918102 |
| 3R | 30345270 | 30345873 | ../05_Mac | 24.41541 | 30345606 |
| 2L | 23162381 | 23162702 | ../05_Mac | 24.4041  | 23162572 |
| 3R | 19558626 | 19558954 | ../05_Mac | 24.4041  | 19558768 |
| 2R | 18743852 | 18744658 | ../05_Mac | 24.39194 | 18744046 |
| 3R | 27004736 | 27005427 | ../05_Mac | 24.37895 | 27004919 |
| 3R | 19886509 | 19887084 | ../05_Mac | 24.36126 | 19886718 |
| 2L | 5640094  | 5640460  | ../05_Mac | 24.354   | 5640286  |
| 3R | 12282409 | 12282755 | ../05_Mac | 24.354   | 12282567 |
| 3R | 12287182 | 12287484 | ../05_Mac | 24.354   | 12287299 |
| 2R | 20093116 | 20093444 | ../05_Mac | 24.34783 | 20093274 |
| 3R | 23657330 | 23657611 | ../05_Mac | 24.34227 | 23657491 |

|    |          |          |           |          |          |
|----|----------|----------|-----------|----------|----------|
| 2L | 18224494 | 18224921 | ../05_Mac | 24.30554 | 18224660 |
| 4  | 1260451  | 1261027  | ../05_Mac | 24.30201 | 1260724  |
| 3L | 22859842 | 22860153 | ../05_Mac | 24.30091 | 22859978 |
| 3R | 31904975 | 31905410 | ../05_Mac | 24.29841 | 31905231 |
| 2L | 17720117 | 17720542 | ../05_Mac | 24.28195 | 17720389 |
| 3R | 12203218 | 12203615 | ../05_Mac | 24.28188 | 12203442 |
| 2R | 8734642  | 8735042  | ../05_Mac | 24.2816  | 8734823  |
| 2R | 22547827 | 22548213 | ../05_Mac | 24.26289 | 22548064 |
| 2L | 17001602 | 17002042 | ../05_Mac | 24.2417  | 17001762 |
| 2R | 8981745  | 8982173  | ../05_Mac | 24.2363  | 8981937  |
| 2L | 3735131  | 3735524  | ../05_Mac | 24.22593 | 3735248  |
| 3L | 18789431 | 18790048 | ../05_Mac | 24.22129 | 18789610 |
| 3L | 523016   | 523388   | ../05_Mac | 24.21479 | 523196   |
| 3L | 22897653 | 22898055 | ../05_Mac | 24.20918 | 22897941 |
| 3R | 12373252 | 12373640 | ../05_Mac | 24.20149 | 12373384 |
| 2R | 7837726  | 7838412  | ../05_Mac | 24.19821 | 7838224  |
| 2L | 18832895 | 18833255 | ../05_Mac | 24.18756 | 18833062 |
| 2L | 2453101  | 2453409  | ../05_Mac | 24.15565 | 2453286  |
| 3R | 27048096 | 27048486 | ../05_Mac | 24.15557 | 27048313 |
| 2L | 8255669  | 8256039  | ../05_Mac | 24.14919 | 8255830  |
| 2L | 10621724 | 10622325 | ../05_Mac | 24.14919 | 10622173 |
| 3R | 19677573 | 19677909 | ../05_Mac | 24.14919 | 19677713 |
| 3R | 7592146  | 7592483  | ../05_Mac | 24.13022 | 7592335  |
| X  | 17752460 | 17752837 | ../05_Mac | 24.13022 | 17752652 |
| 3R | 29099928 | 29100674 | ../05_Mac | 24.12956 | 29100119 |
| 3R | 12861329 | 12862114 | ../05_Mac | 24.12785 | 12861583 |
| 3L | 15731399 | 15731702 | ../05_Mac | 24.11662 | 15731570 |
| 2R | 9169993  | 9170321  | ../05_Mac | 24.11539 | 9170138  |
| 2R | 7154987  | 7155361  | ../05_Mac | 24.09389 | 7155170  |
| 3L | 18783393 | 18783665 | ../05_Mac | 24.09389 | 18783550 |
| 2L | 10672744 | 10673088 | ../05_Mac | 24.08883 | 10672924 |
| 2L | 13926651 | 13927154 | ../05_Mac | 24.08883 | 13927054 |
| 2L | 17164525 | 17164908 | ../05_Mac | 24.08883 | 17164717 |
| 2L | 18050014 | 18050437 | ../05_Mac | 24.08883 | 18050188 |
| 2R | 8002660  | 8002957  | ../05_Mac | 24.08883 | 8002834  |
| 2R | 8049494  | 8050108  | ../05_Mac | 24.08883 | 8049942  |
| 3L | 22601937 | 22602358 | ../05_Mac | 24.08883 | 22602094 |
| 3R | 11037707 | 11038050 | ../05_Mac | 24.08883 | 11037885 |
| 3R | 11284366 | 11284704 | ../05_Mac | 24.08883 | 11284536 |
| X  | 4860074  | 4860368  | ../05_Mac | 24.08883 | 4860201  |
| X  | 5575366  | 5575991  | ../05_Mac | 24.08883 | 5575868  |
| X  | 10726097 | 10726392 | ../05_Mac | 24.08883 | 10726247 |
| 3L | 20447529 | 20447863 | ../05_Mac | 24.07671 | 20447686 |
| 2R | 22294568 | 22294966 | ../05_Mac | 24.07573 | 22294727 |
| 3L | 18223198 | 18223548 | ../05_Mac | 24.05543 | 18223415 |
| 3R | 26010953 | 26011264 | ../05_Mac | 24.0237  | 26011130 |
| 2R | 7116745  | 7117327  | ../05_Mac | 24.02256 | 7117159  |
| 3R | 11712820 | 11713143 | ../05_Mac | 23.9962  | 11712960 |
| 3L | 21817979 | 21818520 | ../05_Mac | 23.99225 | 21818274 |

|    |          |          |           |          |          |
|----|----------|----------|-----------|----------|----------|
| 2L | 12576154 | 12576524 | ../05_Mac | 23.99127 | 12576335 |
| 3L | 17371810 | 17372086 | ../05_Mac | 23.99127 | 17371956 |
| 3L | 20177775 | 20178153 | ../05_Mac | 23.99127 | 20177933 |
| 3L | 4016162  | 4016539  | ../05_Mac | 23.97043 | 4016370  |
| 3L | 21043322 | 21043603 | ../05_Mac | 23.96106 | 21043458 |
| 2R | 26653399 | 26653733 | ../05_Mac | 23.96106 | 26653562 |
| 2L | 1902690  | 1903194  | ../05_Mac | 23.95856 | 1902886  |
| 3L | 18682163 | 18682792 | ../05_Mac | 23.95762 | 18682569 |
| 2R | 8511781  | 8512129  | ../05_Mac | 23.94504 | 8511974  |
| 3R | 14400230 | 14400637 | ../05_Mac | 23.93019 | 14400378 |
| 2L | 12834669 | 12834914 | ../05_Mac | 23.92015 | 12834776 |
| 3R | 7415558  | 7415954  | ../05_Mac | 23.92015 | 7415775  |
| 3R | 26812274 | 26812815 | ../05_Mac | 23.90104 | 26812436 |
| 2L | 15897237 | 15897546 | ../05_Mac | 23.89963 | 15897355 |
| 2R | 11757698 | 11758298 | ../05_Mac | 23.88751 | 11757919 |
| 2L | 16260435 | 16260985 | ../05_Mac | 23.85024 | 16260803 |
| 3R | 8001776  | 8002202  | ../05_Mac | 23.85024 | 8001990  |
| 2L | 18871284 | 18871828 | ../05_Mac | 23.83977 | 18871558 |
| 2R | 11375559 | 11376019 | ../05_Mac | 23.83977 | 11375776 |
| 3L | 3710048  | 3710392  | ../05_Mac | 23.83131 | 3710223  |
| 2R | 8266652  | 8267031  | ../05_Mac | 23.82457 | 8266861  |
| 2L | 13841360 | 13841687 | ../05_Mac | 23.81964 | 13841507 |
| 3R | 10106832 | 10107225 | ../05_Mac | 23.80908 | 10107018 |
| 2L | 11041403 | 11041780 | ../05_Mac | 23.80142 | 11041581 |
| 3L | 8292686  | 8293137  | ../05_Mac | 23.79482 | 8293003  |
| 2R | 20290395 | 20290689 | ../05_Mac | 23.78606 | 20290536 |
| 2R | 12207338 | 12207686 | ../05_Mac | 23.77965 | 12207510 |
| 2R | 9677197  | 9677512  | ../05_Mac | 23.77445 | 9677341  |
| 3R | 4808546  | 4808910  | ../05_Mac | 23.76399 | 4808718  |
| 2R | 15443555 | 15444191 | ../05_Mac | 23.75769 | 15443996 |
| 3R | 15393309 | 15393652 | ../05_Mac | 23.75769 | 15393470 |
| 3R | 28298521 | 28298834 | ../05_Mac | 23.75769 | 28298680 |
| 2R | 17642374 | 17643650 | ../05_Mac | 23.75282 | 17643209 |
| 3R | 16742226 | 16742729 | ../05_Mac | 23.75213 | 16742543 |
| 3R | 31188415 | 31188777 | ../05_Mac | 23.75059 | 31188599 |
| 3R | 8053001  | 8053753  | ../05_Mac | 23.73816 | 8053187  |
| 2L | 20367335 | 20367716 | ../05_Mac | 23.72365 | 20367570 |
| 3R | 14342696 | 14343010 | ../05_Mac | 23.71943 | 14342819 |
| 3R | 24440385 | 24440677 | ../05_Mac | 23.71167 | 24440551 |
| 2L | 15548935 | 15549193 | ../05_Mac | 23.69531 | 15549055 |
| 2L | 2703966  | 2704326  | ../05_Mac | 23.68869 | 2704155  |
| 2L | 2843148  | 2843468  | ../05_Mac | 23.68869 | 2843312  |
| 2L | 10103298 | 10104082 | ../05_Mac | 23.68869 | 10103481 |
| 2L | 14715167 | 14715417 | ../05_Mac | 23.68869 | 14715304 |
| 2L | 17702181 | 17702486 | ../05_Mac | 23.68869 | 17702335 |
| 3L | 26538293 | 26538553 | ../05_Mac | 23.68869 | 26538424 |
| 3R | 5989658  | 5990272  | ../05_Mac | 23.68869 | 5990101  |
| 3R | 29651315 | 29651649 | ../05_Mac | 23.68869 | 29651479 |
| X  | 2559997  | 2560563  | ../05_Mac | 23.68869 | 2560285  |

|    |          |          |           |          |          |
|----|----------|----------|-----------|----------|----------|
| 2R | 6224744  | 6225112  | ../05_Mac | 23.68823 | 6224916  |
| 3L | 22673299 | 22673698 | ../05_Mac | 23.67047 | 22673438 |
| 3L | 22752193 | 22752469 | ../05_Mac | 23.64989 | 22752331 |
| 3R | 13811550 | 13811932 | ../05_Mac | 23.64656 | 13811751 |
| 2L | 6407108  | 6407461  | ../05_Mac | 23.64308 | 6407285  |
| 2L | 12852708 | 12853199 | ../05_Mac | 23.64308 | 12852926 |
| 3R | 6232774  | 6233187  | ../05_Mac | 23.64308 | 6232942  |
| 3R | 10399146 | 10399493 | ../05_Mac | 23.61178 | 10399307 |
| 4  | 3081     | 3785     | ../05_Mac | 23.59349 | 3533     |
| 3R | 21082178 | 21082821 | ../05_Mac | 23.59278 | 21082689 |
| 3R | 19554860 | 19555221 | ../05_Mac | 23.58929 | 19555040 |
| X  | 14226771 | 14227085 | ../05_Mac | 23.58929 | 14226905 |
| 3R | 17317054 | 17317422 | ../05_Mac | 23.5831  | 17317229 |
| 3L | 3232108  | 3232502  | ../05_Mac | 23.57677 | 3232332  |
| 2L | 14522534 | 14522874 | ../05_Mac | 23.56287 | 14522695 |
| 2L | 17616687 | 17617143 | ../05_Mac | 23.56287 | 17616880 |
| 2L | 7142642  | 7143038  | ../05_Mac | 23.56197 | 7142838  |
| 3R | 20640975 | 20641518 | ../05_Mac | 23.52891 | 20641242 |
| 3L | 16896316 | 16896704 | ../05_Mac | 23.52122 | 16896494 |
| 3R | 20518171 | 20518514 | ../05_Mac | 23.51142 | 20518321 |
| 3L | 16355070 | 16355368 | ../05_Mac | 23.50309 | 16355229 |
| 2L | 16599686 | 16600085 | ../05_Mac | 23.49152 | 16599817 |
| 2L | 10539740 | 10540065 | ../05_Mac | 23.48643 | 10539900 |
| 2L | 7177399  | 7177742  | ../05_Mac | 23.47248 | 7177549  |
| 3R | 21619728 | 21620185 | ../05_Mac | 23.46187 | 21619967 |
| 2L | 2670374  | 2670720  | ../05_Mac | 23.46159 | 2670553  |
| 3L | 16167525 | 16167901 | ../05_Mac | 23.45547 | 16167734 |
| 3R | 16527035 | 16527376 | ../05_Mac | 23.43826 | 16527229 |
| 2L | 8004626  | 8004986  | ../05_Mac | 23.43824 | 8004807  |
| 3L | 16387640 | 16388000 | ../05_Mac | 23.43823 | 16387769 |
| 3R | 27684497 | 27684769 | ../05_Mac | 23.42515 | 27684655 |
| 3R | 12386080 | 12386518 | ../05_Mac | 23.42366 | 12386351 |
| 2L | 7298887  | 7299232  | ../05_Mac | 23.4201  | 7299035  |
| 3L | 13288970 | 13289419 | ../05_Mac | 23.41794 | 13289203 |
| 3L | 2331090  | 2331415  | ../05_Mac | 23.41359 | 2331260  |
| 3L | 3074644  | 3075075  | ../05_Mac | 23.40927 | 3074841  |
| 3R | 25650672 | 25651224 | ../05_Mac | 23.39698 | 25651021 |
| 2L | 6824175  | 6824481  | ../05_Mac | 23.36734 | 6824295  |
| 3L | 15703251 | 15703692 | ../05_Mac | 23.3559  | 15703503 |
| 2L | 5437343  | 5437831  | ../05_Mac | 23.32377 | 5437538  |
| 2L | 20402252 | 20402563 | ../05_Mac | 23.32377 | 20402387 |
| 3L | 14833414 | 14833828 | ../05_Mac | 23.32302 | 14833583 |
| 2R | 9714660  | 9714957  | ../05_Mac | 23.3201  | 9714785  |
| 2R | 14402167 | 14402546 | ../05_Mac | 23.3201  | 14402371 |
| 3L | 17973063 | 17973396 | ../05_Mac | 23.315   | 17973231 |
| 2L | 20028486 | 20028945 | ../05_Mac | 23.30155 | 20028721 |
| 2L | 4564070  | 4564396  | ../05_Mac | 23.29804 | 4564248  |
| 2L | 2639671  | 2640166  | ../05_Mac | 23.29107 | 2640025  |
| 2L | 4273291  | 4273637  | ../05_Mac | 23.29107 | 4273482  |

|    |          |          |           |          |          |
|----|----------|----------|-----------|----------|----------|
| 2L | 4702375  | 4702642  | ../05_Mac | 23.29107 | 4702497  |
| 2L | 5585821  | 5586150  | ../05_Mac | 23.29107 | 5585974  |
| 2L | 10025075 | 10025345 | ../05_Mac | 23.29107 | 10025191 |
| 2R | 5825927  | 5826298  | ../05_Mac | 23.29107 | 5826133  |
| 3L | 22496267 | 22496631 | ../05_Mac | 23.29107 | 22496446 |
| 2L | 12032957 | 12033262 | ../05_Mac | 23.28082 | 12033115 |
| 2R | 22320387 | 22320701 | ../05_Mac | 23.27583 | 22320551 |
| 2L | 2259710  | 2260063  | ../05_Mac | 23.26312 | 2259888  |
| 2R | 6588976  | 6589319  | ../05_Mac | 23.26312 | 6589083  |
| 3L | 8731857  | 8732184  | ../05_Mac | 23.26069 | 8732009  |
| 3L | 8496520  | 8496819  | ../05_Mac | 23.2379  | 8496694  |
| 2L | 2083570  | 2083971  | ../05_Mac | 23.22801 | 2083792  |
| 2R | 18339127 | 18339437 | ../05_Mac | 23.20781 | 18339261 |
| 3L | 3044649  | 3044991  | ../05_Mac | 23.19937 | 3044824  |
| 2L | 7624477  | 7625141  | ../05_Mac | 23.19587 | 7624848  |
| 3L | 17509423 | 17509814 | ../05_Mac | 23.19587 | 17509630 |
| 2R | 22909457 | 22909788 | ../05_Mac | 23.19551 | 22909609 |
| 3R | 23131196 | 23131497 | ../05_Mac | 23.19551 | 23131346 |
| 3L | 19483814 | 19484105 | ../05_Mac | 23.16756 | 19483954 |
| 3L | 16258673 | 16259075 | ../05_Mac | 23.15532 | 16258917 |
| 3R | 13075656 | 13076000 | ../05_Mac | 23.13141 | 13075820 |
| 2R | 4299880  | 4300173  | ../05_Mac | 23.12957 | 4300058  |
| 3R | 18986276 | 18986635 | ../05_Mac | 23.1153  | 18986459 |
| 3R | 13348364 | 13348696 | ../05_Mac | 23.11241 | 13348540 |
| 2R | 14883450 | 14883801 | ../05_Mac | 23.11136 | 14883618 |
| 2R | 15753867 | 15754182 | ../05_Mac | 23.10127 | 15754047 |
| 3L | 3701000  | 3701315  | ../05_Mac | 23.1     | 3701176  |
| 2L | 7178787  | 7179121  | ../05_Mac | 23.07756 | 7178893  |
| 3R | 24335247 | 24335566 | ../05_Mac | 23.06913 | 24335413 |
| 2R | 6690425  | 6690880  | ../05_Mac | 23.03582 | 6690597  |
| 2L | 557828   | 558167   | ../05_Mac | 23.0053  | 557983   |
| 3L | 16492554 | 16492865 | ../05_Mac | 22.99835 | 16492726 |
| 2R | 4626941  | 4627337  | ../05_Mac | 22.99696 | 4627194  |
| 2R | 7090580  | 7091022  | ../05_Mac | 22.97914 | 7090755  |
| 2R | 10303830 | 10304149 | ../05_Mac | 22.97747 | 10304009 |
| 3R | 17243420 | 17243760 | ../05_Mac | 22.97684 | 17243581 |
| 3R | 7785848  | 7786472  | ../05_Mac | 22.96614 | 7786292  |
| 3R | 17728273 | 17728667 | ../05_Mac | 22.9618  | 17728485 |
| 3L | 17512499 | 17512816 | ../05_Mac | 22.95501 | 17512677 |
| 3R | 24640765 | 24641102 | ../05_Mac | 22.93611 | 24640889 |
| 3R | 30311121 | 30311539 | ../05_Mac | 22.93611 | 30311326 |
| 2R | 15758405 | 15758995 | ../05_Mac | 22.92871 | 15758587 |
| 3L | 15178647 | 15178995 | ../05_Mac | 22.92871 | 15178838 |
| 2L | 7436385  | 7436969  | ../05_Mac | 22.89562 | 7436547  |
| 2L | 10018825 | 10019142 | ../05_Mac | 22.89562 | 10018971 |
| 2L | 11741297 | 11741775 | ../05_Mac | 22.89562 | 11741578 |
| 2L | 15510958 | 15511329 | ../05_Mac | 22.89562 | 15511238 |
| 2R | 13688434 | 13688786 | ../05_Mac | 22.89562 | 13688591 |
| 3R | 11254169 | 11254505 | ../05_Mac | 22.89562 | 11254327 |

|    |          |          |           |          |          |
|----|----------|----------|-----------|----------|----------|
| 3R | 28458979 | 28459279 | ../05_Mac | 22.89562 | 28459126 |
| X  | 4014253  | 4014572  | ../05_Mac | 22.89562 | 4014405  |
| X  | 4435691  | 4435989  | ../05_Mac | 22.89562 | 4435860  |
| X  | 10521228 | 10521767 | ../05_Mac | 22.89562 | 10521394 |
| X  | 18229251 | 18229560 | ../05_Mac | 22.89562 | 18229403 |
| 2R | 18982363 | 18982770 | ../05_Mac | 22.89091 | 18982592 |
| 3L | 6947909  | 6948236  | ../05_Mac | 22.89089 | 6948066  |
| 2R | 6075019  | 6075394  | ../05_Mac | 22.88051 | 6075215  |
| 3R | 27454938 | 27455341 | ../05_Mac | 22.86929 | 27455060 |
| X  | 19667862 | 19668152 | ../05_Mac | 22.86929 | 19668034 |
| 2L | 10632321 | 10632641 | ../05_Mac | 22.86431 | 10632494 |
| 3L | 16553144 | 16553479 | ../05_Mac | 22.86431 | 16553282 |
| 3R | 8794506  | 8794833  | ../05_Mac | 22.86196 | 8794661  |
| 3R | 27134623 | 27134939 | ../05_Mac | 22.86072 | 27134783 |
| 2L | 13496156 | 13496869 | ../05_Mac | 22.85367 | 13496476 |
| 2L | 18756590 | 18757205 | ../05_Mac | 22.85367 | 18756804 |
| 3R | 24286337 | 24286720 | ../05_Mac | 22.84149 | 24286578 |
| 2L | 7672355  | 7673105  | ../05_Mac | 22.83124 | 7672866  |
| 2L | 13172628 | 13172884 | ../05_Mac | 22.82916 | 13172712 |
| 2R | 10754946 | 10755480 | ../05_Mac | 22.81723 | 10755195 |
| 3L | 5214805  | 5215154  | ../05_Mac | 22.81723 | 5214969  |
| 3L | 11355283 | 11355902 | ../05_Mac | 22.816   | 11355514 |
| 3R | 26105622 | 26106004 | ../05_Mac | 22.816   | 26105836 |
| 4  | 1087587  | 1087899  | ../05_Mac | 22.81007 | 1087740  |
| 3L | 11760419 | 11760759 | ../05_Mac | 22.79831 | 11760579 |
| 2R | 22906845 | 22907386 | ../05_Mac | 22.78098 | 22907083 |
| 3L | 19433132 | 19433566 | ../05_Mac | 22.78098 | 19433308 |
| 3R | 15754501 | 15755034 | ../05_Mac | 22.78098 | 15754691 |
| 2L | 61034    | 61648    | ../05_Mac | 22.76554 | 61375    |
| 3R | 22634591 | 22634930 | ../05_Mac | 22.76404 | 22634741 |
| 2R | 5782678  | 5783046  | ../05_Mac | 22.76278 | 5782880  |
| 3L | 16556641 | 16556961 | ../05_Mac | 22.75215 | 16556806 |
| 2R | 6896957  | 6897353  | ../05_Mac | 22.74506 | 6897206  |
| 3R | 10374465 | 10374802 | ../05_Mac | 22.74506 | 10374654 |
| 2L | 11921854 | 11922199 | ../05_Mac | 22.7332  | 11922090 |
| 3L | 8883466  | 8883983  | ../05_Mac | 22.7332  | 8883621  |
| 2L | 18183419 | 18183763 | ../05_Mac | 22.72548 | 18183554 |
| 3L | 12924862 | 12925164 | ../05_Mac | 22.69613 | 12924987 |
| 3L | 13760564 | 13760975 | ../05_Mac | 22.69613 | 13760747 |
| 3L | 25986299 | 25986836 | ../05_Mac | 22.69613 | 25986469 |
| 2L | 4344295  | 4344602  | ../05_Mac | 22.6942  | 4344449  |
| 3L | 19789296 | 19789667 | ../05_Mac | 22.68405 | 19789460 |
| 3L | 6282522  | 6282855  | ../05_Mac | 22.68324 | 6282680  |
| 3R | 19423729 | 19424054 | ../05_Mac | 22.64394 | 19423914 |
| 3L | 4838545  | 4838845  | ../05_Mac | 22.63866 | 4838680  |
| 3L | 12543208 | 12543526 | ../05_Mac | 22.63866 | 12543366 |
| 4  | 748783   | 749141   | ../05_Mac | 22.63866 | 748959   |
| 2R | 19080861 | 19081145 | ../05_Mac | 22.63805 | 19080996 |
| 3L | 19536873 | 19537179 | ../05_Mac | 22.6368  | 19537026 |



|    |          |          |           |          |          |
|----|----------|----------|-----------|----------|----------|
| 2R | 24139670 | 24140032 | ../05_Mac | 22.6283  | 24139842 |
| 3L | 594948   | 595284   | ../05_Mac | 22.6283  | 595091   |
| 2L | 4083737  | 4084089  | ../05_Mac | 22.61364 | 4083956  |
| 3R | 21859775 | 21860192 | ../05_Mac | 22.61364 | 21859948 |
| 2R | 20017676 | 20018041 | ../05_Mac | 22.60676 | 20017851 |
| 2L | 8342299  | 8342872  | ../05_Mac | 22.60369 | 8342518  |
| 2L | 13269921 | 13270261 | ../05_Mac | 22.57353 | 13270100 |
| 3R | 24741093 | 24741407 | ../05_Mac | 22.57195 | 24741259 |
| 2L | 12357300 | 12357613 | ../05_Mac | 22.56902 | 12357453 |
| 2R | 8640096  | 8640402  | ../05_Mac | 22.56902 | 8640216  |
| 3L | 17772929 | 17773279 | ../05_Mac | 22.56902 | 17773123 |
| 3L | 20110160 | 20110474 | ../05_Mac | 22.56902 | 20110355 |
| 3R | 20377440 | 20377713 | ../05_Mac | 22.5449  | 20377595 |
| 3L | 13317208 | 13317697 | ../05_Mac | 22.53602 | 13317481 |
| 2L | 958069   | 958392   | ../05_Mac | 22.50285 | 958254   |
| 2L | 15381227 | 15381554 | ../05_Mac | 22.50285 | 15381396 |
| 2L | 19096692 | 19096938 | ../05_Mac | 22.50285 | 19096798 |
| 3L | 3511373  | 3511753  | ../05_Mac | 22.50285 | 3511556  |
| 3L | 3793707  | 3794027  | ../05_Mac | 22.50285 | 3793871  |
| 3L | 7469488  | 7469771  | ../05_Mac | 22.50285 | 7469590  |
| 3R | 30899467 | 30899805 | ../05_Mac | 22.50285 | 30899638 |
| X  | 4250703  | 4251329  | ../05_Mac | 22.50285 | 4250863  |
| X  | 8422522  | 8422837  | ../05_Mac | 22.50285 | 8422664  |
| X  | 13567384 | 13567702 | ../05_Mac | 22.50285 | 13567507 |
| 3L | 22142250 | 22142591 | ../05_Mac | 22.50158 | 22142424 |
| 3L | 6070130  | 6070507  | ../05_Mac | 22.47905 | 6070343  |
| 2R | 10277562 | 10277957 | ../05_Mac | 22.4646  | 10277737 |
| 3R | 28156171 | 28156536 | ../05_Mac | 22.4562  | 28156351 |
| 3R | 8634104  | 8634542  | ../05_Mac | 22.43731 | 8634367  |
| 2L | 12444180 | 12444489 | ../05_Mac | 22.4354  | 12444318 |
| 3R | 8545037  | 8545432  | ../05_Mac | 22.42983 | 8545218  |
| 3L | 3713148  | 3713668  | ../05_Mac | 22.42787 | 3713272  |
| 2R | 6851497  | 6851799  | ../05_Mac | 22.40281 | 6851653  |
| 2R | 5930068  | 5930351  | ../05_Mac | 22.40192 | 5930197  |
| 3R | 29823284 | 29823915 | ../05_Mac | 22.40123 | 29823400 |
| 2L | 17870660 | 17871008 | ../05_Mac | 22.40107 | 17870831 |
| 3L | 12441088 | 12441618 | ../05_Mac | 22.40107 | 12441477 |
| 3R | 30228441 | 30228792 | ../05_Mac | 22.40107 | 30228615 |
| 3R | 12584509 | 12584872 | ../05_Mac | 22.39668 | 12584697 |
| 3L | 90789    | 91182    | ../05_Mac | 22.39585 | 90958    |
| 3R | 16433645 | 16434071 | ../05_Mac | 22.39585 | 16433849 |
| 3L | 19136628 | 19137117 | ../05_Mac | 22.39119 | 19136918 |
| 3R | 10026641 | 10027249 | ../05_Mac | 22.37451 | 10026870 |
| 3R | 6622170  | 6622668  | ../05_Mac | 22.3726  | 6622353  |
| 2L | 13834755 | 13835166 | ../05_Mac | 22.36529 | 13834977 |
| 2L | 18547273 | 18547699 | ../05_Mac | 22.35471 | 18547507 |
| 2R | 5829804  | 5830146  | ../05_Mac | 22.35402 | 5829987  |
| 2L | 7455336  | 7455709  | ../05_Mac | 22.34709 | 7455539  |
| 2R | 21794992 | 21795346 | ../05_Mac | 22.34459 | 21795174 |

|    |          |          |           |          |          |
|----|----------|----------|-----------|----------|----------|
| 3R | 28851754 | 28852070 | ../05_Mac | 22.33601 | 28851927 |
| 2L | 18117626 | 18117928 | ../05_Mac | 22.33244 | 18117792 |
| 3L | 14703489 | 14703797 | ../05_Mac | 22.32553 | 14703613 |
| 2R | 5675074  | 5675594  | ../05_Mac | 22.3184  | 5675416  |
| 3L | 8681340  | 8681892  | ../05_Mac | 22.314   | 8681708  |
| 3R | 12125025 | 12125432 | ../05_Mac | 22.31248 | 12125254 |
| 3R | 26751852 | 26752534 | ../05_Mac | 22.28964 | 26751999 |
| 2L | 578401   | 578685   | ../05_Mac | 22.27649 | 578555   |
| 3R | 19001978 | 19002324 | ../05_Mac | 22.2758  | 19002173 |
| 2L | 14483479 | 14483786 | ../05_Mac | 22.26842 | 14483594 |
| 2L | 11847091 | 11847443 | ../05_Mac | 22.26329 | 11847272 |
| 3R | 6214022  | 6214722  | ../05_Mac | 22.26285 | 6214175  |
| 3L | 14860749 | 14861206 | ../05_Mac | 22.24409 | 14860915 |
| 3R | 25424864 | 25425173 | ../05_Mac | 22.24134 | 25425031 |
| 3L | 22526565 | 22526971 | ../05_Mac | 22.23631 | 22526787 |
| 3R | 32049555 | 32049945 | ../05_Mac | 22.23363 | 32049754 |
| 3L | 4050433  | 4050882  | ../05_Mac | 22.2249  | 4050665  |
| 3R | 29914225 | 29914489 | ../05_Mac | 22.21109 | 29914392 |
| 2R | 19793598 | 19794029 | ../05_Mac | 22.20735 | 19793832 |
| 3R | 11925384 | 11926115 | ../05_Mac | 22.20735 | 11925923 |
| 3R | 12910196 | 12910517 | ../05_Mac | 22.20735 | 12910337 |
| 3L | 12999294 | 12999674 | ../05_Mac | 22.19223 | 12999497 |
| 2L | 16124130 | 16124464 | ../05_Mac | 22.1846  | 16124246 |
| 2R | 11940329 | 11940735 | ../05_Mac | 22.1846  | 11940580 |
| 3R | 26743123 | 26743388 | ../05_Mac | 22.16011 | 26743244 |
| 3R | 22893598 | 22893890 | ../05_Mac | 22.15945 | 22893722 |
| 3R | 14354037 | 14354405 | ../05_Mac | 22.15255 | 14354243 |
| 3L | 7589795  | 7590117  | ../05_Mac | 22.15201 | 7589955  |
| 2R | 12030017 | 12030328 | ../05_Mac | 22.15004 | 12030172 |
| 2R | 10364097 | 10364445 | ../05_Mac | 22.14482 | 10364260 |
| 3R | 8282406  | 8282772  | ../05_Mac | 22.14482 | 8282554  |
| 3L | 22337681 | 22338052 | ../05_Mac | 22.14144 | 22337877 |
| 3R | 11107978 | 11108265 | ../05_Mac | 22.13484 | 11108104 |
| 2L | 13364685 | 13365020 | ../05_Mac | 22.13308 | 13364830 |
| 2L | 13695896 | 13696374 | ../05_Mac | 22.11402 | 13696081 |
| 2L | 1391053  | 1391391  | ../05_Mac | 22.11255 | 1391238  |
| 2L | 20524374 | 20524709 | ../05_Mac | 22.11255 | 20524518 |
| 2R | 5787275  | 5787627  | ../05_Mac | 22.11255 | 5787410  |
| 2R | 12411775 | 12412164 | ../05_Mac | 22.11255 | 12411983 |
| 3L | 22934858 | 22935299 | ../05_Mac | 22.11255 | 22935010 |
| 3L | 26009147 | 26009626 | ../05_Mac | 22.11255 | 26009320 |
| 3R | 1958305  | 1958605  | ../05_Mac | 22.11255 | 1958477  |
| 3R | 5896719  | 5897077  | ../05_Mac | 22.11255 | 5896970  |
| 3R | 29735359 | 29735685 | ../05_Mac | 22.11255 | 29735530 |
| X  | 11758607 | 11758946 | ../05_Mac | 22.11255 | 11758760 |
| X  | 13063193 | 13063482 | ../05_Mac | 22.11255 | 13063345 |
| X  | 17859177 | 17859524 | ../05_Mac | 22.11255 | 17859342 |
| X  | 19319950 | 19320246 | ../05_Mac | 22.11255 | 19320126 |
| X  | 21383589 | 21384021 | ../05_Mac | 22.11255 | 21383785 |

|    |          |          |           |          |          |
|----|----------|----------|-----------|----------|----------|
| 3R | 16491400 | 16491725 | ../05_Mac | 22.08656 | 16491597 |
| 2R | 21995700 | 21996164 | ../05_Mac | 22.07468 | 21995934 |
| 3L | 7837612  | 7838046  | ../05_Mac | 22.05252 | 7837760  |
| 2R | 20248489 | 20248846 | ../05_Mac | 22.04918 | 20248650 |
| 3R | 14561017 | 14561461 | ../05_Mac | 22.04501 | 14561227 |
| 2L | 6005646  | 6005940  | ../05_Mac | 22.04034 | 6005797  |
| 3L | 17417404 | 17417831 | ../05_Mac | 22.02983 | 17417629 |
| 2R | 18281022 | 18281315 | ../05_Mac | 22.02699 | 18281178 |
| 3L | 22961841 | 22962286 | ../05_Mac | 22.00641 | 22962059 |
| 3R | 15553302 | 15553730 | ../05_Mac | 22.00422 | 15553500 |
| 2R | 17309162 | 17309672 | ../05_Mac | 21.99598 | 17309424 |
| 3L | 8658378  | 8658769  | ../05_Mac | 21.98784 | 8658510  |
| 3L | 17909115 | 17909491 | ../05_Mac | 21.98546 | 17909274 |
| 3R | 17491499 | 17491845 | ../05_Mac | 21.97279 | 17491719 |
| 3L | 8102761  | 8103114  | ../05_Mac | 21.95373 | 8102956  |
| 3R | 18921098 | 18921423 | ../05_Mac | 21.95032 | 18921282 |
| 2L | 15365609 | 15365938 | ../05_Mac | 21.9394  | 15365779 |
| 2R | 13681731 | 13682071 | ../05_Mac | 21.9394  | 13681841 |
| 3R | 29501304 | 29502086 | ../05_Mac | 21.93884 | 29501832 |
| 3R | 8335722  | 8336108  | ../05_Mac | 21.93307 | 8335848  |
| 2L | 2555935  | 2556307  | ../05_Mac | 21.90627 | 2556117  |
| 3R | 22650196 | 22650556 | ../05_Mac | 21.90627 | 22650379 |
| 3R | 13769063 | 13769413 | ../05_Mac | 21.8919  | 13769289 |
| 2L | 13179344 | 13179698 | ../05_Mac | 21.89084 | 13179530 |
| 3L | 7420063  | 7420377  | ../05_Mac | 21.88887 | 7420195  |
| 2R | 20735606 | 20736141 | ../05_Mac | 21.88383 | 20735862 |
| 3L | 1234435  | 1234753  | ../05_Mac | 21.87341 | 1234599  |
| 4  | 249926   | 250241   | ../05_Mac | 21.87341 | 250078   |
| 2R | 6763431  | 6763758  | ../05_Mac | 21.85624 | 6763582  |
| 3L | 8059646  | 8060014  | ../05_Mac | 21.85624 | 8059828  |
| 2L | 22092429 | 22092829 | ../05_Mac | 21.85563 | 22092624 |
| 3L | 18977565 | 18978063 | ../05_Mac | 21.8408  | 18977755 |
| 3L | 6302901  | 6303412  | ../05_Mac | 21.81947 | 6303267  |
| 3R | 14908295 | 14908751 | ../05_Mac | 21.81947 | 14908463 |
| 2L | 18267505 | 18268213 | ../05_Mac | 21.81162 | 18267691 |
| 3R | 8520912  | 8521291  | ../05_Mac | 21.81162 | 8521152  |
| 3L | 2997428  | 2997785  | ../05_Mac | 21.80845 | 2997589  |
| 2L | 15474723 | 15475229 | ../05_Mac | 21.80089 | 15475039 |
| 2R | 11834045 | 11834361 | ../05_Mac | 21.77648 | 11834210 |
| 3L | 22923424 | 22923728 | ../05_Mac | 21.77648 | 22923575 |
| 3R | 27848881 | 27850067 | ../05_Mac | 21.77638 | 27849075 |
| 3R | 5469567  | 5469984  | ../05_Mac | 21.77458 | 5469833  |
| 3L | 10221048 | 10221401 | ../05_Mac | 21.77251 | 10221250 |
| 3L | 13612865 | 13613201 | ../05_Mac | 21.75055 | 13613047 |
| 3L | 22416091 | 22416469 | ../05_Mac | 21.75055 | 22416280 |
| 2L | 20089267 | 20089678 | ../05_Mac | 21.73381 | 20089552 |
| 2L | 12929850 | 12930202 | ../05_Mac | 21.72472 | 12929998 |
| 2L | 19015337 | 19015812 | ../05_Mac | 21.72472 | 19015560 |
| 2R | 8549503  | 8549855  | ../05_Mac | 21.72472 | 8549674  |

|    |          |          |           |          |          |
|----|----------|----------|-----------|----------|----------|
| 2R | 15129985 | 15130244 | ../05_Mac | 21.72472 | 15130117 |
| 3L | 13554498 | 13554791 | ../05_Mac | 21.72472 | 13554615 |
| 3R | 592724   | 592980   | ../05_Mac | 21.72472 | 592867   |
| 3R | 20262421 | 20262758 | ../05_Mac | 21.72472 | 20262561 |
| X  | 12207909 | 12208180 | ../05_Mac | 21.72472 | 12208051 |
| 2R | 8046213  | 8046819  | ../05_Mac | 21.68582 | 8046525  |
| 3R | 29985609 | 29986034 | ../05_Mac | 21.68582 | 29985747 |
| 2R | 17654120 | 17654472 | ../05_Mac | 21.68121 | 17654276 |
| 2L | 11549904 | 11550240 | ../05_Mac | 21.66429 | 11550079 |
| 3R | 28651743 | 28652217 | ../05_Mac | 21.65514 | 28651872 |
| 3L | 4613260  | 4613672  | ../05_Mac | 21.65318 | 4613501  |
| 3R | 19136158 | 19136464 | ../05_Mac | 21.64668 | 19136303 |
| 3R | 20853795 | 20854055 | ../05_Mac | 21.63499 | 20853910 |
| 3L | 9071677  | 9071932  | ../05_Mac | 21.63317 | 9071829  |
| 3L | 10125674 | 10126441 | ../05_Mac | 21.62487 | 10125870 |
| 3L | 5554230  | 5554981  | ../05_Mac | 21.61318 | 5554797  |
| 2R | 6907720  | 6908212  | ../05_Mac | 21.61011 | 6908025  |
| 2L | 7518405  | 7518870  | ../05_Mac | 21.60329 | 7518694  |
| 3R | 4478219  | 4478602  | ../05_Mac | 21.60157 | 4478459  |
| 3L | 24081156 | 24081539 | ../05_Mac | 21.57756 | 24081344 |
| 3R | 17919105 | 17919439 | ../05_Mac | 21.57756 | 17919246 |
| 3R | 20083073 | 20083394 | ../05_Mac | 21.5436  | 20083215 |
| 3R | 17739010 | 17739476 | ../05_Mac | 21.50998 | 17739202 |
| 3L | 19390464 | 19390846 | ../05_Mac | 21.50731 | 19390689 |
| 3L | 12287008 | 12287443 | ../05_Mac | 21.50224 | 12287231 |
| 3L | 3351875  | 3352153  | ../05_Mac | 21.4943  | 3352044  |
| 3R | 24545250 | 24545593 | ../05_Mac | 21.4943  | 24545383 |
| 2L | 16617712 | 16618044 | ../05_Mac | 21.49242 | 16617859 |
| 2R | 6538468  | 6538924  | ../05_Mac | 21.47878 | 6538664  |
| 2R | 24216111 | 24216409 | ../05_Mac | 21.47665 | 24216235 |
| 3L | 3706960  | 3707255  | ../05_Mac | 21.47665 | 3707107  |
| 2R | 17343520 | 17344382 | ../05_Mac | 21.47582 | 17343996 |
| 3R | 29492343 | 29492803 | ../05_Mac | 21.4737  | 29492501 |
| 2L | 5470268  | 5470749  | ../05_Mac | 21.46661 | 5470458  |
| 3R | 10593545 | 10593909 | ../05_Mac | 21.46661 | 10593742 |
| 3R | 16739918 | 16740287 | ../05_Mac | 21.42902 | 16740116 |
| 3R | 10137696 | 10138364 | ../05_Mac | 21.42845 | 10137886 |
| 2L | 8380399  | 8380700  | ../05_Mac | 21.41677 | 8380543  |
| 2L | 1510188  | 1510978  | ../05_Mac | 21.41082 | 1510360  |
| 2L | 5209028  | 5209330  | ../05_Mac | 21.40185 | 5209166  |
| 3R | 24194263 | 24194977 | ../05_Mac | 21.40185 | 24194494 |
| 3L | 11670561 | 11671028 | ../05_Mac | 21.3881  | 11670778 |
| 3R | 29083525 | 29084040 | ../05_Mac | 21.3881  | 29083861 |
| 2L | 18289105 | 18289608 | ../05_Mac | 21.37837 | 18289252 |
| 3R | 16148585 | 16148927 | ../05_Mac | 21.34551 | 16148719 |
| 3R | 30767393 | 30767810 | ../05_Mac | 21.34284 | 30767633 |
| 2L | 990163   | 990651   | ../05_Mac | 21.33965 | 990329   |
| 2L | 1627659  | 1627930  | ../05_Mac | 21.33965 | 1627779  |
| 2R | 13612015 | 13612522 | ../05_Mac | 21.33965 | 13612316 |

|    |          |          |           |          |          |
|----|----------|----------|-----------|----------|----------|
| 3L | 12224768 | 12225086 | ../05_Mac | 21.33965 | 12224937 |
| 3R | 7579152  | 7579463  | ../05_Mac | 21.33965 | 7579331  |
| 3R | 8415773  | 8416571  | ../05_Mac | 21.33965 | 8415933  |
| 3R | 20418513 | 20418924 | ../05_Mac | 21.33965 | 20418763 |
| X  | 8335197  | 8335474  | ../05_Mac | 21.33965 | 8335325  |
| 2R | 20677490 | 20677842 | ../05_Mac | 21.31745 | 20677711 |
| 3R | 30559660 | 30559976 | ../05_Mac | 21.31275 | 30559846 |
| 2R | 21693064 | 21693497 | ../05_Mac | 21.30346 | 21693269 |
| 2R | 6558100  | 6558417  | ../05_Mac | 21.2886  | 6558293  |
| 2R | 17852202 | 17852530 | ../05_Mac | 21.27492 | 17852332 |
| 3L | 17853515 | 17853915 | ../05_Mac | 21.27492 | 17853737 |
| 3R | 9391995  | 9392329  | ../05_Mac | 21.27492 | 9392156  |
| 2L | 10572837 | 10573349 | ../05_Mac | 21.26477 | 10573124 |
| 3L | 7113631  | 7114172  | ../05_Mac | 21.26477 | 7113991  |
| 3L | 13446529 | 13446827 | ../05_Mac | 21.26477 | 13446667 |
| 2R | 13716720 | 13717205 | ../05_Mac | 21.25732 | 13716904 |
| 2L | 17612442 | 17612868 | ../05_Mac | 21.25349 | 17612620 |
| 3L | 16312367 | 16312743 | ../05_Mac | 21.2266  | 16312543 |
| 3R | 24627941 | 24628291 | ../05_Mac | 21.19171 | 24628112 |
| 3L | 16460302 | 16460701 | ../05_Mac | 21.18874 | 16460449 |
| 2R | 24985747 | 24986055 | ../05_Mac | 21.18739 | 24985917 |
| 3R | 25391502 | 25391903 | ../05_Mac | 21.15122 | 25391693 |
| 2L | 21871706 | 21872566 | ../05_Mac | 21.14916 | 21871903 |
| 2R | 15065209 | 15065618 | ../05_Mac | 21.14916 | 15065462 |
| 3L | 8870478  | 8871020  | ../05_Mac | 21.14743 | 8870847  |
| 2L | 8919434  | 8919721  | ../05_Mac | 21.13338 | 8919567  |
| 3L | 11544544 | 11544890 | ../05_Mac | 21.11156 | 11544720 |
| 3R | 20449121 | 20449488 | ../05_Mac | 21.07845 | 20449256 |
| 3L | 6438018  | 6438374  | ../05_Mac | 21.07501 | 6438201  |
| 3R | 22436462 | 22436772 | ../05_Mac | 21.07501 | 22436633 |
| 3L | 11599578 | 11599861 | ../05_Mac | 21.07192 | 11599729 |
| 2L | 1079967  | 1080314  | ../05_Mac | 21.07114 | 1080198  |
| 3L | 3309969  | 3310773  | ../05_Mac | 21.06855 | 3310592  |
| 2R | 21207307 | 21207636 | ../05_Mac | 21.05868 | 21207511 |
| 3L | 14940589 | 14940927 | ../05_Mac | 21.05391 | 14940758 |
| 2L | 19744398 | 19744709 | ../05_Mac | 21.0323  | 19744568 |
| 3L | 8260739  | 8261094  | ../05_Mac | 21.01414 | 8260910  |
| 3R | 20433490 | 20433798 | ../05_Mac | 21.01414 | 20433654 |
| 3R | 23765775 | 23766039 | ../05_Mac | 21.01414 | 23765890 |
| 2L | 4134201  | 4134504  | ../05_Mac | 21.00287 | 4134376  |
| 2R | 19058388 | 19058693 | ../05_Mac | 20.99017 | 19058547 |
| 3R | 18349662 | 18350001 | ../05_Mac | 20.98121 | 18349852 |
| 3R | 26973108 | 26973444 | ../05_Mac | 20.97121 | 26973295 |
| 3R | 11839428 | 11839767 | ../05_Mac | 20.95728 | 11839587 |
| 2L | 10902938 | 10903403 | ../05_Mac | 20.95693 | 10903219 |
| 2R | 1751798  | 1752107  | ../05_Mac | 20.95693 | 1751925  |
| 2R | 5198835  | 5199221  | ../05_Mac | 20.95693 | 5199004  |
| 2R | 5967387  | 5967711  | ../05_Mac | 20.95693 | 5967537  |
| 3L | 1689884  | 1690220  | ../05_Mac | 20.95693 | 1690051  |

|    |          |          |           |          |          |
|----|----------|----------|-----------|----------|----------|
| 3L | 2672746  | 2672998  | ../05_Mac | 20.95693 | 2672873  |
| 3L | 2704715  | 2704988  | ../05_Mac | 20.95693 | 2704853  |
| 3L | 17280898 | 17281208 | ../05_Mac | 20.95693 | 17281033 |
| 3L | 23598518 | 23598822 | ../05_Mac | 20.95693 | 23598657 |
| 3L | 24387455 | 24387739 | ../05_Mac | 20.95693 | 24387583 |
| 3R | 1718257  | 1718512  | ../05_Mac | 20.95693 | 1718407  |
| 3R | 7623549  | 7624042  | ../05_Mac | 20.95693 | 7623856  |
| X  | 12252258 | 12252486 | ../05_Mac | 20.95693 | 12252359 |
| 3L | 20173659 | 20173950 | ../05_Mac | 20.95459 | 20173786 |
| 3L | 13055410 | 13055809 | ../05_Mac | 20.95291 | 13055658 |
| 3L | 1706172  | 1706798  | ../05_Mac | 20.9508  | 1706659  |
| 2L | 3262991  | 3263486  | ../05_Mac | 20.93306 | 3263247  |
| 2L | 8887408  | 8887870  | ../05_Mac | 20.93306 | 8887601  |
| 3R | 17635355 | 17635672 | ../05_Mac | 20.93306 | 17635511 |
| 3R | 30405387 | 30405933 | ../05_Mac | 20.93306 | 30405660 |
| 2R | 21893018 | 21893396 | ../05_Mac | 20.92974 | 21893175 |
| 3L | 17624160 | 17624464 | ../05_Mac | 20.92804 | 17624305 |
| 2R | 6593499  | 6593877  | ../05_Mac | 20.91903 | 6593693  |
| 2R | 18039669 | 18039995 | ../05_Mac | 20.91803 | 18039827 |
| 3R | 2556942  | 2557284  | ../05_Mac | 20.91215 | 2557102  |
| 2R | 19966077 | 19966392 | ../05_Mac | 20.89705 | 19966237 |
| 2R | 20239849 | 20240573 | ../05_Mac | 20.89705 | 20240001 |
| 3L | 8555095  | 8555330  | ../05_Mac | 20.89705 | 8555249  |
| 2R | 22371192 | 22371560 | ../05_Mac | 20.88846 | 22371378 |
| 2L | 17704445 | 17704888 | ../05_Mac | 20.88709 | 17704642 |
| 3L | 1557069  | 1557645  | ../05_Mac | 20.85644 | 1557490  |
| 2R | 12214786 | 12215364 | ../05_Mac | 20.85515 | 12215079 |
| 3L | 4993509  | 4993867  | ../05_Mac | 20.85515 | 4993702  |
| 2R | 16069551 | 16069842 | ../05_Mac | 20.85185 | 16069664 |
| 2L | 8469169  | 8469514  | ../05_Mac | 20.85124 | 8469342  |
| 3R | 6796598  | 6797042  | ../05_Mac | 20.84065 | 6796880  |
| 2R | 8634226  | 8634521  | ../05_Mac | 20.82684 | 8634338  |
| 3R | 17813993 | 17814330 | ../05_Mac | 20.8173  | 17814189 |
| 3R | 15028288 | 15028724 | ../05_Mac | 20.80225 | 15028532 |
| 3R | 14839361 | 14839778 | ../05_Mac | 20.77196 | 14839603 |
| 3L | 12536954 | 12537344 | ../05_Mac | 20.76991 | 12537162 |
| 2R | 27650809 | 27651066 | ../05_Mac | 20.76403 | 27650960 |
| 2L | 873204   | 873519   | ../05_Mac | 20.762   | 873323   |
| 3R | 18560728 | 18561219 | ../05_Mac | 20.75563 | 18561065 |
| 2R | 11363015 | 11363617 | ../05_Mac | 20.75366 | 11363462 |
| 2R | 18857589 | 18857840 | ../05_Mac | 20.75305 | 18857723 |
| 2L | 4548165  | 4548498  | ../05_Mac | 20.73142 | 4548329  |
| 2R | 24837320 | 24838110 | ../05_Mac | 20.73142 | 24837896 |
| 3L | 4034503  | 4034801  | ../05_Mac | 20.72964 | 4034660  |
| 3L | 5247476  | 5247813  | ../05_Mac | 20.72964 | 5247659  |
| 3L | 9488980  | 9489351  | ../05_Mac | 20.71506 | 9489165  |
| 2R | 24885514 | 24885866 | ../05_Mac | 20.69373 | 24885682 |
| 3L | 9026319  | 9026644  | ../05_Mac | 20.68644 | 9026488  |
| 3L | 15075429 | 15075793 | ../05_Mac | 20.67684 | 15075618 |

|    |          |          |           |          |          |
|----|----------|----------|-----------|----------|----------|
| 3R | 16456883 | 16457193 | ../05_Mac | 20.66786 | 16457047 |
| 3L | 19796386 | 19796751 | ../05_Mac | 20.66588 | 19796569 |
| 3R | 16616492 | 16616821 | ../05_Mac | 20.66582 | 16616635 |
| 2R | 19660564 | 19661032 | ../05_Mac | 20.65218 | 19660841 |
| 2L | 22533701 | 22534489 | ../05_Mac | 20.64972 | 22534200 |
| 2R | 18676308 | 18676692 | ../05_Mac | 20.64576 | 18676455 |
| 3R | 26609532 | 26609929 | ../05_Mac | 20.6427  | 26609708 |
| 3R | 14565873 | 14566570 | ../05_Mac | 20.6349  | 14566036 |
| 3L | 2469546  | 2469909  | ../05_Mac | 20.62088 | 2469691  |
| 2L | 10203199 | 10203580 | ../05_Mac | 20.61468 | 10203382 |
| 3R | 18763742 | 18764048 | ../05_Mac | 20.61392 | 18763857 |
| 3L | 14713283 | 14713803 | ../05_Mac | 20.60997 | 14713529 |
| 3R | 25584515 | 25585209 | ../05_Mac | 20.59021 | 25584757 |
| 2R | 8495955  | 8496289  | ../05_Mac | 20.58524 | 8496133  |
| 2L | 20254713 | 20254997 | ../05_Mac | 20.5769  | 20254869 |
| 3L | 13796877 | 13797189 | ../05_Mac | 20.5769  | 13797050 |
| 3R | 760778   | 761054   | ../05_Mac | 20.5769  | 760948   |
| 3R | 3577053  | 3577376  | ../05_Mac | 20.5769  | 3577200  |
| 3R | 5989099  | 5989531  | ../05_Mac | 20.5769  | 5989303  |
| 3R | 6509382  | 6509899  | ../05_Mac | 20.5769  | 6509540  |
| 3R | 9615445  | 9615918  | ../05_Mac | 20.5769  | 9615760  |
| 3R | 22283013 | 22283384 | ../05_Mac | 20.5769  | 22283194 |
| X  | 6745023  | 6745299  | ../05_Mac | 20.5769  | 6745150  |
| 3R | 28054283 | 28054713 | ../05_Mac | 20.56005 | 28054457 |
| 2R | 13148144 | 13148559 | ../05_Mac | 20.55734 | 13148333 |
| 2L | 3427109  | 3427724  | ../05_Mac | 20.55453 | 3427577  |
| 2L | 11255084 | 11255386 | ../05_Mac | 20.55453 | 11255245 |
| 3L | 8907905  | 8908243  | ../05_Mac | 20.55453 | 8908068  |
| 3L | 14131624 | 14132036 | ../05_Mac | 20.55453 | 14131890 |
| 3R | 14233570 | 14233907 | ../05_Mac | 20.55453 | 14233748 |
| 3R | 14445092 | 14445430 | ../05_Mac | 20.55453 | 14445210 |
| 3R | 9171015  | 9171370  | ../05_Mac | 20.55368 | 9171190  |
| 2R | 16704340 | 16704757 | ../05_Mac | 20.54306 | 16704501 |
| 2L | 19232558 | 19232965 | ../05_Mac | 20.51318 | 19232740 |
| 2R | 5972183  | 5972639  | ../05_Mac | 20.50662 | 5972361  |
| 2R | 23570430 | 23570765 | ../05_Mac | 20.50022 | 23570611 |
| 3R | 14178930 | 14179294 | ../05_Mac | 20.49824 | 14179079 |
| 2R | 8310993  | 8311555  | ../05_Mac | 20.47039 | 8311387  |
| 2L | 4860769  | 4861151  | ../05_Mac | 20.45656 | 4860988  |
| 2L | 3634894  | 3635293  | ../05_Mac | 20.4543  | 3635086  |
| 2R | 17097597 | 17097904 | ../05_Mac | 20.44179 | 17097733 |
| 3R | 31228618 | 31229127 | ../05_Mac | 20.43485 | 31228746 |
| 3R | 14996035 | 14996512 | ../05_Mac | 20.43423 | 14996240 |
| 2R | 8621101  | 8621402  | ../05_Mac | 20.43353 | 8621241  |
| 2L | 14191416 | 14191924 | ../05_Mac | 20.42739 | 14191637 |
| 3L | 2002453  | 2002740  | ../05_Mac | 20.42467 | 2002579  |
| 2R | 12037505 | 12037835 | ../05_Mac | 20.41553 | 12037685 |
| 2R | 8627074  | 8627358  | ../05_Mac | 20.4029  | 8627209  |
| 2R | 7230744  | 7231228  | ../05_Mac | 20.39848 | 7231063  |

|    |           |          |           |          |          |
|----|-----------|----------|-----------|----------|----------|
| 3R | 16067199  | 16067923 | ../05_Mac | 20.38574 | 16067379 |
| 2R | 7307478   | 7307893  | ../05_Mac | 20.36898 | 7307625  |
| 2L | 8160379   | 8160723  | ../05_Mac | 20.35122 | 8160557  |
| 3L | 278094    | 278700   | ../05_Mac | 20.33056 | 278249   |
| 2R | 5966936   | 5967265  | ../05_Mac | 20.30002 | 5967074  |
| 3L | 20041041  | 20041468 | ../05_Mac | 20.30002 | 20041277 |
| 2R | 25228237  | 25228582 | ../05_Mac | 20.26916 | 25228404 |
| 3L | 10451755  | 10452377 | ../05_Mac | 20.26365 | 10452236 |
| 3R | 19927889  | 19928185 | ../05_Mac | 20.26365 | 19928031 |
| 3R | 18626227  | 18626572 | ../05_Mac | 20.25829 | 18626395 |
| 2L | 20598233  | 20598586 | ../05_Mac | 20.25817 | 20598363 |
| 3R | 13559379  | 13559774 | ../05_Mac | 20.25817 | 13559626 |
| 3R | 17076169  | 17076468 | ../05_Mac | 20.25113 | 17076305 |
| 2R | 20820050  | 20820395 | ../05_Mac | 20.23139 | 20820186 |
| 3L | 4919865   | 4920192  | ../05_Mac | 20.22375 | 4919985  |
| 2R | 195110696 | 19511040 | ../05_Mac | 20.2109  | 19510896 |
| 2L | 11399034  | 11399315 | ../05_Mac | 20.19948 | 11399163 |
| 2L | 11489693  | 11489958 | ../05_Mac | 20.19948 | 11489815 |
| 2L | 14279875  | 14280161 | ../05_Mac | 20.19948 | 14279999 |
| 2L | 16923117  | 16923487 | ../05_Mac | 20.19948 | 16923310 |
| 2R | 1656477   | 1656864  | ../05_Mac | 20.19948 | 1656605  |
| 2R | 5868266   | 5868639  | ../05_Mac | 20.19948 | 5868414  |
| 2R | 10003629  | 10003964 | ../05_Mac | 20.19948 | 10003789 |
| 2R | 13069560  | 13069814 | ../05_Mac | 20.19948 | 13069724 |
| 2R | 14695820  | 14696159 | ../05_Mac | 20.19948 | 14695977 |
| 3L | 6896094   | 6896382  | ../05_Mac | 20.19948 | 6896218  |
| 3L | 23885123  | 23885383 | ../05_Mac | 20.19948 | 23885284 |
| 3R | 16783492  | 16783765 | ../05_Mac | 20.19948 | 16783605 |
| 3R | 19754687  | 19755037 | ../05_Mac | 20.19948 | 19754839 |
| X  | 902533    | 902814   | ../05_Mac | 20.19948 | 902671   |
| X  | 13353460  | 13353714 | ../05_Mac | 20.19948 | 13353599 |
| 2L | 16899147  | 16899733 | ../05_Mac | 20.19449 | 16899329 |
| 3L | 21990666  | 21991159 | ../05_Mac | 20.19141 | 21990974 |
| 2R | 12567837  | 12568124 | ../05_Mac | 20.19015 | 12568000 |
| 3L | 4318740   | 4318973  | ../05_Mac | 20.18762 | 4318848  |
| X  | 9642834   | 9643141  | ../05_Mac | 20.18438 | 9643004  |
| 2L | 8498380   | 8498700  | ../05_Mac | 20.17717 | 8498540  |
| 2L | 21223126  | 21223443 | ../05_Mac | 20.16153 | 21223279 |
| 2R | 20462285  | 20462632 | ../05_Mac | 20.15563 | 20462508 |
| 3L | 8740511   | 8740806  | ../05_Mac | 20.15335 | 8740666  |
| 2R | 12219000  | 12219420 | ../05_Mac | 20.15104 | 12219164 |
| 3R | 6196818   | 6197169  | ../05_Mac | 20.15104 | 6196956  |
| 2L | 748761    | 749272   | ../05_Mac | 20.12514 | 749008   |
| 3R | 20319649  | 20320008 | ../05_Mac | 20.12142 | 20319827 |
| 2R | 21225496  | 21225851 | ../05_Mac | 20.1113  | 21225672 |
| 3R | 21775626  | 21776167 | ../05_Mac | 20.09793 | 21775936 |
| 3R | 26806430  | 26806768 | ../05_Mac | 20.08994 | 26806601 |
| 2R | 16374830  | 16375296 | ../05_Mac | 20.08035 | 16374990 |
| 2L | 4396928   | 4397268  | ../05_Mac | 20.07659 | 4397114  |



|    |          |          |           |          |          |
|----|----------|----------|-----------|----------|----------|
| 3L | 19131522 | 19131903 | ../05_Mac | 20.07174 | 19131725 |
| 3L | 11058597 | 11058923 | ../05_Mac | 20.06972 | 11058759 |
| 2L | 3849519  | 3850186  | ../05_Mac | 20.05902 | 3849714  |
| 2R | 24720932 | 24721245 | ../05_Mac | 20.05902 | 24721104 |
| 3R | 21852677 | 21853045 | ../05_Mac | 20.0546  | 21852884 |
| 2L | 8435556  | 8435842  | ../05_Mac | 20.05207 | 8435684  |
| 3L | 6598196  | 6598836  | ../05_Mac | 20.04381 | 6598660  |
| 3R | 7360239  | 7360539  | ../05_Mac | 20.03623 | 7360376  |
| 2R | 16273840 | 16274192 | ../05_Mac | 20.03193 | 16273997 |
| 3R | 4664283  | 4664610  | ../05_Mac | 20.0268  | 4664473  |
| 3L | 5920898  | 5921317  | ../05_Mac | 20.02384 | 5921053  |
| 2R | 20492189 | 20492495 | ../05_Mac | 19.99417 | 20492331 |
| 3R | 28676710 | 28677133 | ../05_Mac | 19.99235 | 28676969 |
| 3L | 6236159  | 6236504  | ../05_Mac | 19.9875  | 6236316  |
| 3L | 13434368 | 13434770 | ../05_Mac | 19.9875  | 13434551 |
| 3L | 16674741 | 16675195 | ../05_Mac | 19.9875  | 16675014 |
| 3L | 177588   | 178020   | ../05_Mac | 19.97502 | 177759   |
| 2R | 23718554 | 23718935 | ../05_Mac | 19.97485 | 23718741 |
| 2R | 15194434 | 15194802 | ../05_Mac | 19.97139 | 15194604 |
| 3L | 13381551 | 13381966 | ../05_Mac | 19.97139 | 13381714 |
| 3L | 2420706  | 2421013  | ../05_Mac | 19.96855 | 2420849  |
| 3L | 15529097 | 15529461 | ../05_Mac | 19.93891 | 15529281 |
| 2L | 6499103  | 6499386  | ../05_Mac | 19.93508 | 6499220  |
| 3R | 10122920 | 10123286 | ../05_Mac | 19.93233 | 10123121 |
| 3R | 18272667 | 18272992 | ../05_Mac | 19.93233 | 18272835 |
| 2R | 20433057 | 20433919 | ../05_Mac | 19.93072 | 20433371 |
| 3R | 16747471 | 16747796 | ../05_Mac | 19.93072 | 16747620 |
| 4  | 245137   | 245576   | ../05_Mac | 19.92576 | 245359   |
| 3R | 10179545 | 10180029 | ../05_Mac | 19.91588 | 10179767 |
| 3L | 12415083 | 12415409 | ../05_Mac | 19.91428 | 12415218 |
| 2L | 11942045 | 11942437 | ../05_Mac | 19.90201 | 11942247 |
| 3R | 31607723 | 31608059 | ../05_Mac | 19.90201 | 31607912 |
| 2L | 13315438 | 13316294 | ../05_Mac | 19.89951 | 13315647 |
| 2R | 18311939 | 18312269 | ../05_Mac | 19.89879 | 18312080 |
| 3R | 19527747 | 19528210 | ../05_Mac | 19.88292 | 19528020 |
| 2L | 4225120  | 4225482  | ../05_Mac | 19.87829 | 4225328  |
| 2L | 10096193 | 10096631 | ../05_Mac | 19.87736 | 10096420 |
| 3R | 14312310 | 14312654 | ../05_Mac | 19.85456 | 14312495 |
| 3R | 23107003 | 23107554 | ../05_Mac | 19.85456 | 23107328 |
| 3R | 5241789  | 5242098  | ../05_Mac | 19.84028 | 5241972  |
| 3R | 19672550 | 19672915 | ../05_Mac | 19.84028 | 19672709 |
| 2R | 12802897 | 12803192 | ../05_Mac | 19.83828 | 12803076 |
| 3L | 620254   | 620545   | ../05_Mac | 19.83137 | 620378   |
| 2L | 16688266 | 16688636 | ../05_Mac | 19.83006 | 16688401 |
| 2L | 19802092 | 19802491 | ../05_Mac | 19.83006 | 19802232 |
| 3L | 428984   | 429365   | ../05_Mac | 19.83006 | 429166   |
| 2L | 6748337  | 6748653  | ../05_Mac | 19.8248  | 6748497  |
| 3L | 9325447  | 9325943  | ../05_Mac | 19.8248  | 9325789  |
| 3R | 631008   | 631216   | ../05_Mac | 19.8248  | 631111   |

|    |          |          |           |          |          |
|----|----------|----------|-----------|----------|----------|
| 3R | 2096270  | 2096580  | ../05_Mac | 19.8248  | 2096407  |
| 3R | 11539384 | 11539695 | ../05_Mac | 19.8248  | 11539530 |
| 3R | 17438905 | 17439547 | ../05_Mac | 19.8248  | 17439387 |
| 3R | 17848640 | 17849026 | ../05_Mac | 19.8248  | 17848783 |
| 3R | 23446455 | 23446808 | ../05_Mac | 19.8248  | 23446644 |
| X  | 380387   | 380699   | ../05_Mac | 19.8248  | 380544   |
| X  | 5237923  | 5238210  | ../05_Mac | 19.8248  | 5238027  |
| X  | 5862894  | 5863155  | ../05_Mac | 19.8248  | 5863067  |
| X  | 13152499 | 13152779 | ../05_Mac | 19.8248  | 13152657 |
| X  | 14561448 | 14561692 | ../05_Mac | 19.8248  | 14561556 |
| X  | 14982380 | 14982729 | ../05_Mac | 19.8248  | 14982592 |
| 2L | 19275564 | 19275848 | ../05_Mac | 19.81075 | 19275675 |
| 3L | 18581804 | 18582099 | ../05_Mac | 19.80918 | 18581955 |
| 3L | 7848850  | 7849148  | ../05_Mac | 19.8008  | 7848968  |
| 2L | 10779259 | 10779840 | ../05_Mac | 19.79898 | 10779465 |
| 3R | 19937401 | 19937710 | ../05_Mac | 19.79898 | 19937535 |
| 3R | 21206111 | 21206462 | ../05_Mac | 19.76922 | 21206314 |
| 3R | 16379035 | 16379423 | ../05_Mac | 19.76882 | 16379249 |
| 3R | 22964441 | 22964808 | ../05_Mac | 19.76637 | 22964634 |
| 3R | 31262181 | 31262914 | ../05_Mac | 19.76278 | 31262720 |
| 2L | 9272790  | 9273156  | ../05_Mac | 19.75855 | 9272952  |
| 3R | 19664209 | 19664537 | ../05_Mac | 19.73789 | 19664374 |
| 3R | 15811884 | 15812350 | ../05_Mac | 19.7363  | 15812076 |
| 3L | 6898074  | 6898518  | ../05_Mac | 19.72943 | 6898150  |
| 3R | 30903361 | 30903661 | ../05_Mac | 19.72943 | 30903544 |
| 3L | 12561703 | 12562026 | ../05_Mac | 19.72866 | 12561859 |
| 3R | 27695954 | 27696288 | ../05_Mac | 19.71546 | 27696114 |
| 3L | 11539947 | 11540256 | ../05_Mac | 19.70337 | 11540102 |
| 3R | 24750364 | 24750697 | ../05_Mac | 19.69799 | 24750508 |
| 3L | 9290289  | 9290714  | ../05_Mac | 19.69129 | 9290446  |
| 3R | 16891129 | 16891532 | ../05_Mac | 19.68883 | 16891280 |
| 2L | 23312194 | 23312463 | ../05_Mac | 19.67426 | 23312304 |
| 2R | 16913865 | 16914185 | ../05_Mac | 19.67426 | 16914067 |
| 3R | 29593322 | 29593602 | ../05_Mac | 19.67426 | 29593474 |
| 2R | 24375839 | 24376212 | ../05_Mac | 19.67383 | 24375996 |
| 3L | 16235827 | 16236420 | ../05_Mac | 19.67064 | 16235985 |
| 2R | 20595277 | 20595724 | ../05_Mac | 19.66343 | 20595516 |
| 2L | 4723093  | 4723398  | ../05_Mac | 19.66229 | 4723236  |
| 2L | 5795359  | 5795659  | ../05_Mac | 19.65944 | 5795491  |
| 3L | 22296654 | 22297329 | ../05_Mac | 19.65944 | 22297143 |
| 2R | 12354182 | 12354494 | ../05_Mac | 19.64905 | 12354357 |
| 3L | 11636543 | 11636936 | ../05_Mac | 19.64025 | 11636754 |
| 2L | 1959060  | 1959410  | ../05_Mac | 19.63244 | 1959242  |
| 3R | 4383695  | 4384029  | ../05_Mac | 19.62097 | 4383852  |
| 3L | 22937349 | 22937756 | ../05_Mac | 19.61745 | 22937541 |
| 3R | 7671347  | 7671792  | ../05_Mac | 19.61745 | 7671570  |
| 3R | 14932769 | 14933047 | ../05_Mac | 19.61745 | 14932907 |
| 3R | 21926126 | 21926405 | ../05_Mac | 19.57298 | 21926279 |
| X  | 2108763  | 2109023  | ../05_Mac | 19.57298 | 2108918  |

|    |          |          |           |          |          |
|----|----------|----------|-----------|----------|----------|
| 2R | 12616133 | 12616469 | ../05_Mac | 19.57252 | 12616306 |
| 2L | 8650627  | 8650939  | ../05_Mac | 19.55156 | 8650749  |
| 3R | 11173716 | 11174157 | ../05_Mac | 19.55156 | 11174033 |
| 2L | 11951369 | 11951706 | ../05_Mac | 19.5445  | 11951518 |
| 3R | 26663548 | 26663867 | ../05_Mac | 19.5445  | 26663716 |
| 2R | 2961646  | 2961994  | ../05_Mac | 19.53153 | 2961825  |
| 3R | 25804692 | 25805060 | ../05_Mac | 19.5292  | 25804881 |
| 2L | 9777150  | 9777552  | ../05_Mac | 19.5274  | 9777386  |
| 3L | 9497023  | 9497320  | ../05_Mac | 19.5115  | 9497175  |
| 2L | 16073472 | 16073825 | ../05_Mac | 19.50834 | 16073665 |
| 3L | 22217749 | 22218207 | ../05_Mac | 19.50834 | 22217956 |
| 3R | 6975842  | 6976184  | ../05_Mac | 19.49984 | 6976019  |
| 2R | 24676530 | 24676852 | ../05_Mac | 19.49207 | 24676677 |
| 3L | 18283501 | 18283981 | ../05_Mac | 19.49207 | 18283667 |
| 3R | 7221831  | 7222273  | ../05_Mac | 19.49207 | 7222010  |
| 3R | 16083349 | 16083607 | ../05_Mac | 19.49158 | 16083474 |
| 2L | 4498574  | 4498869  | ../05_Mac | 19.4726  | 4498692  |
| 3L | 10579472 | 10579897 | ../05_Mac | 19.4726  | 10579642 |
| 3R | 19743431 | 19743733 | ../05_Mac | 19.46833 | 19743569 |
| 3L | 2318324  | 2318749  | ../05_Mac | 19.46704 | 2318599  |
| 2L | 2694679  | 2695114  | ../05_Mac | 19.45247 | 2694866  |
| 2R | 18194214 | 18194833 | ../05_Mac | 19.45247 | 18194659 |
| 3L | 939293   | 939659   | ../05_Mac | 19.45247 | 939476   |
| 3R | 28079996 | 28080308 | ../05_Mac | 19.45247 | 28080125 |
| 3R | 29323095 | 29323570 | ../05_Mac | 19.45247 | 29323279 |
| X  | 10419810 | 10420119 | ../05_Mac | 19.45247 | 10419964 |
| X  | 18135225 | 18135560 | ../05_Mac | 19.45247 | 18135403 |
| 3L | 10202858 | 10203349 | ../05_Mac | 19.44282 | 10203145 |
| 2L | 13324251 | 13324593 | ../05_Mac | 19.42882 | 13324415 |
| 3R | 25787773 | 25788072 | ../05_Mac | 19.42882 | 25787906 |
| 2L | 5840413  | 5840792  | ../05_Mac | 19.41765 | 5840632  |
| 3L | 22727470 | 22727780 | ../05_Mac | 19.41157 | 22727610 |
| 3L | 4787156  | 4787496  | ../05_Mac | 19.40474 | 4787359  |
| 3L | 10078354 | 10078626 | ../05_Mac | 19.40474 | 10078475 |
| 3L | 19250208 | 19250723 | ../05_Mac | 19.38795 | 19250442 |
| 3R | 25930934 | 25931247 | ../05_Mac | 19.38795 | 25931047 |
| 2L | 4867383  | 4867729  | ../05_Mac | 19.38276 | 4867540  |
| 2L | 16216427 | 16216750 | ../05_Mac | 19.38276 | 16216611 |
| 2L | 9013795  | 9014113  | ../05_Mac | 19.34728 | 9013965  |
| 2L | 2337031  | 2337431  | ../05_Mac | 19.3412  | 2337244  |
| 2L | 18477614 | 18477914 | ../05_Mac | 19.34023 | 18477767 |
| 2R | 16956126 | 16956403 | ../05_Mac | 19.32913 | 16956254 |
| 3R | 27653489 | 27653895 | ../05_Mac | 19.30864 | 27653696 |
| 2R | 14741738 | 14742062 | ../05_Mac | 19.30681 | 14741897 |
| 3L | 4734018  | 4734265  | ../05_Mac | 19.30681 | 4734142  |
| 2R | 20736278 | 20736704 | ../05_Mac | 19.30067 | 20736429 |
| 2L | 20414471 | 20414791 | ../05_Mac | 19.29627 | 20414657 |
| 3R | 12015584 | 12015857 | ../05_Mac | 19.29627 | 12015739 |
| 2R | 24960677 | 24960960 | ../05_Mac | 19.29511 | 24960835 |

|    |          |          |           |          |          |
|----|----------|----------|-----------|----------|----------|
| 2R | 11224486 | 11225191 | ../05_Mac | 19.28428 | 11224734 |
| 2L | 17029334 | 17029611 | ../05_Mac | 19.26641 | 17029448 |
| 3R | 3634912  | 3635194  | ../05_Mac | 19.26641 | 3635063  |
| 3L | 2425608  | 2425987  | ../05_Mac | 19.2662  | 2425766  |
| 3R | 12580238 | 12580535 | ../05_Mac | 19.2662  | 12580387 |
| 3R | 23531718 | 23532043 | ../05_Mac | 19.2662  | 23531862 |
| 3L | 470354   | 470676   | ../05_Mac | 19.25548 | 470509   |
| 2L | 9229728  | 9230026  | ../05_Mac | 19.24971 | 9229897  |
| 3L | 13516292 | 13516562 | ../05_Mac | 19.24847 | 13516438 |
| 2R | 16771570 | 16771999 | ../05_Mac | 19.23593 | 16771845 |
| 2R | 17410437 | 17410700 | ../05_Mac | 19.23191 | 17410555 |
| 2L | 9468893  | 9469166  | ../05_Mac | 19.22823 | 9469015  |
| 3L | 10014896 | 10015280 | ../05_Mac | 19.22823 | 10015048 |
| 3L | 17174232 | 17174696 | ../05_Mac | 19.22823 | 17174545 |
| 3L | 21900294 | 21900596 | ../05_Mac | 19.22167 | 21900448 |
| 2L | 6626179  | 6626501  | ../05_Mac | 19.21334 | 6626322  |
| 3L | 5272590  | 5273465  | ../05_Mac | 19.20329 | 5273276  |
| 3L | 13125243 | 13125616 | ../05_Mac | 19.20329 | 13125439 |
| 3R | 22992272 | 22992666 | ../05_Mac | 19.19117 | 22992443 |
| 3R | 21876369 | 21876796 | ../05_Mac | 19.18784 | 21876581 |
| 2L | 19848440 | 19848848 | ../05_Mac | 19.17867 | 19848611 |
| 3R | 19625238 | 19625546 | ../05_Mac | 19.16644 | 19625367 |
| 3R | 8260822  | 8261110  | ../05_Mac | 19.16058 | 8260968  |
| 2R | 20793840 | 20794256 | ../05_Mac | 19.15438 | 20794018 |
| 2L | 11480916 | 11481341 | ../05_Mac | 19.15204 | 11481152 |
| 3R | 30874894 | 30875477 | ../05_Mac | 19.14715 | 30875320 |
| 3L | 21675362 | 21675679 | ../05_Mac | 19.13512 | 21675509 |
| 2R | 18519980 | 18520318 | ../05_Mac | 19.12937 | 18520190 |
| 2R | 14927236 | 14927547 | ../05_Mac | 19.12575 | 14927381 |
| 2R | 20474309 | 20474730 | ../05_Mac | 19.11772 | 20474561 |
| 2L | 15053198 | 15053691 | ../05_Mac | 19.11572 | 15053550 |
| 3L | 3306651  | 3306961  | ../05_Mac | 19.09171 | 3306798  |
| 2L | 14391003 | 14391392 | ../05_Mac | 19.08811 | 14391169 |
| 3L | 13429601 | 13429909 | ../05_Mac | 19.08811 | 13429747 |
| 2L | 896657   | 897157   | ../05_Mac | 19.08257 | 896835   |
| 2L | 2718220  | 2718505  | ../05_Mac | 19.08257 | 2718380  |
| 2R | 20956318 | 20956670 | ../05_Mac | 19.08257 | 20956553 |
| 3L | 18343761 | 18344280 | ../05_Mac | 19.08257 | 18343912 |
| 3R | 3595403  | 3595721  | ../05_Mac | 19.08257 | 3595596  |
| 3R | 17872830 | 17873097 | ../05_Mac | 19.08257 | 17872944 |
| 3R | 28047270 | 28047693 | ../05_Mac | 19.08257 | 28047450 |
| X  | 5454931  | 5455203  | ../05_Mac | 19.08257 | 5455054  |
| X  | 22753496 | 22753806 | ../05_Mac | 19.08257 | 22753669 |
| 2L | 15114707 | 15115039 | ../05_Mac | 19.06677 | 15114853 |
| 3R | 7889012  | 7889311  | ../05_Mac | 19.05036 | 7889146  |
| 3R | 22506802 | 22507242 | ../05_Mac | 19.03217 | 22507046 |
| 3R | 14505945 | 14506334 | ../05_Mac | 19.03154 | 14506129 |
| 3L | 753467   | 753753   | ../05_Mac | 19.01262 | 753596   |
| 3R | 16093427 | 16093776 | ../05_Mac | 19.01243 | 16093601 |

|    |          |          |           |          |          |
|----|----------|----------|-----------|----------|----------|
| 3R | 22958337 | 22958632 | ../05_Mac | 19.01219 | 22958468 |
| 3R | 31689238 | 31689528 | ../05_Mac | 18.99848 | 31689347 |
| 3R | 26661927 | 26662333 | ../05_Mac | 18.99593 | 26662103 |
| 2L | 3523406  | 3523707  | ../05_Mac | 18.99335 | 3523549  |
| 2L | 14067083 | 14067525 | ../05_Mac | 18.99335 | 14067277 |
| 3R | 22557744 | 22558008 | ../05_Mac | 18.98838 | 22557859 |
| 2R | 22065622 | 22065891 | ../05_Mac | 18.98412 | 22065763 |
| 2R | 11103193 | 11103582 | ../05_Mac | 18.98088 | 11103372 |
| 3R | 9896765  | 9897185  | ../05_Mac | 18.98088 | 9896972  |
| 2R | 22552927 | 22553252 | ../05_Mac | 18.96695 | 22553082 |
| 2L | 6105524  | 6105918  | ../05_Mac | 18.96512 | 6105720  |
| 2R | 17275882 | 17276215 | ../05_Mac | 18.93962 | 17276025 |
| 3L | 15002393 | 15002618 | ../05_Mac | 18.93962 | 15002494 |
| 3R | 20076041 | 20076909 | ../05_Mac | 18.92215 | 20076222 |
| 3R | 28613627 | 28613893 | ../05_Mac | 18.92215 | 28613753 |
| 2L | 22143625 | 22143934 | ../05_Mac | 18.91244 | 22143775 |
| 3L | 4044243  | 4044536  | ../05_Mac | 18.90499 | 4044374  |
| 2L | 21065810 | 21066127 | ../05_Mac | 18.90242 | 21065931 |
| 3L | 18864158 | 18864422 | ../05_Mac | 18.89518 | 18864307 |
| 2L | 2699962  | 2700270  | ../05_Mac | 18.88519 | 2700134  |
| 2L | 3819071  | 3819484  | ../05_Mac | 18.88519 | 3819252  |
| 3R | 9895365  | 9895672  | ../05_Mac | 18.88025 | 9895515  |
| 3L | 8867439  | 8867786  | ../05_Mac | 18.87941 | 8867562  |
| 3L | 19227003 | 19227366 | ../05_Mac | 18.87941 | 19227207 |
| 3R | 23133030 | 23133411 | ../05_Mac | 18.87941 | 23133228 |
| 3L | 7965988  | 7966328  | ../05_Mac | 18.87646 | 7966181  |
| 3R | 12722764 | 12723140 | ../05_Mac | 18.86458 | 12722967 |
| 3R | 30964998 | 30965328 | ../05_Mac | 18.84097 | 30965160 |
| 2R | 8470992  | 8471305  | ../05_Mac | 18.84015 | 8471162  |
| 3R | 13484888 | 13485178 | ../05_Mac | 18.84015 | 13485047 |
| 3R | 23199336 | 23199761 | ../05_Mac | 18.83862 | 23199559 |
| 3R | 9413989  | 9414761  | ../05_Mac | 18.83707 | 9414178  |
| 2L | 8823303  | 8823630  | ../05_Mac | 18.83703 | 8823494  |
| 2L | 16570165 | 16570663 | ../05_Mac | 18.81839 | 16570427 |
| 3L | 4397330  | 4397903  | ../05_Mac | 18.8067  | 4397747  |
| 2R | 8425010  | 8425291  | ../05_Mac | 18.80431 | 8425140  |
| 3R | 16069070 | 16069410 | ../05_Mac | 18.79385 | 16069249 |
| 2L | 11025157 | 11025618 | ../05_Mac | 18.79325 | 11025404 |
| 3R | 23805443 | 23805828 | ../05_Mac | 18.78166 | 23805649 |
| 3R | 10377799 | 10378181 | ../05_Mac | 18.77887 | 10377986 |
| 2L | 1474069  | 1474481  | ../05_Mac | 18.76937 | 1474302  |
| 2L | 14896407 | 14896811 | ../05_Mac | 18.76937 | 14896603 |
| 2R | 14439612 | 14439912 | ../05_Mac | 18.76937 | 14439774 |
| 3L | 4138733  | 4139032  | ../05_Mac | 18.76464 | 4138851  |
| 3R | 20223762 | 20224156 | ../05_Mac | 18.76421 | 20223899 |
| 3L | 15645343 | 15645827 | ../05_Mac | 18.75225 | 15645513 |
| 2R | 21444816 | 21445266 | ../05_Mac | 18.74776 | 21445005 |
| 3R | 31544513 | 31544837 | ../05_Mac | 18.72427 | 31544655 |
| 2L | 18807904 | 18808450 | ../05_Mac | 18.72019 | 18808190 |

|    |          |          |           |          |          |
|----|----------|----------|-----------|----------|----------|
| 2R | 4900087  | 4900411  | ../05_Mac | 18.71905 | 4900235  |
| 2R | 17542246 | 17542499 | ../05_Mac | 18.7173  | 17542363 |
| 2L | 1875210  | 1875502  | ../05_Mac | 18.71525 | 1875353  |
| 2L | 4144778  | 4145122  | ../05_Mac | 18.71525 | 4144991  |
| 2L | 9275100  | 9275495  | ../05_Mac | 18.71525 | 9275267  |
| 2L | 9325236  | 9325455  | ../05_Mac | 18.71525 | 9325344  |
| 2L | 15445385 | 15445718 | ../05_Mac | 18.71525 | 15445527 |
| 2R | 24320745 | 24321401 | ../05_Mac | 18.71525 | 24321290 |
| 3L | 1286473  | 1286814  | ../05_Mac | 18.71525 | 1286644  |
| 3L | 22445712 | 22446073 | ../05_Mac | 18.71525 | 22445857 |
| 3R | 1957498  | 1957776  | ../05_Mac | 18.71525 | 1957622  |
| 3R | 17359325 | 17359809 | ../05_Mac | 18.71525 | 17359528 |
| 3R | 18836694 | 18837288 | ../05_Mac | 18.71525 | 18837077 |
| 3R | 28140448 | 28140842 | ../05_Mac | 18.71525 | 28140616 |
| X  | 17977399 | 17977843 | ../05_Mac | 18.71525 | 17977506 |
| X  | 19433872 | 19434137 | ../05_Mac | 18.71525 | 19433993 |
| X  | 19846357 | 19846938 | ../05_Mac | 18.71525 | 19846510 |
| 3L | 17254524 | 17254899 | ../05_Mac | 18.71288 | 17254700 |
| 2L | 15374383 | 15374908 | ../05_Mac | 18.6937  | 15374580 |
| 3R | 19985808 | 19986144 | ../05_Mac | 18.6937  | 19985965 |
| 3L | 5885912  | 5886247  | ../05_Mac | 18.69349 | 5886051  |
| 2L | 4165054  | 4165356  | ../05_Mac | 18.68727 | 4165214  |
| 2R | 18904995 | 18905365 | ../05_Mac | 18.67797 | 18905197 |
| 3R | 19349132 | 19349973 | ../05_Mac | 18.67797 | 19349360 |
| 2R | 12127813 | 12128151 | ../05_Mac | 18.67303 | 12127967 |
| 2L | 6405770  | 6406289  | ../05_Mac | 18.67102 | 6406053  |
| 3L | 19194750 | 19195342 | ../05_Mac | 18.66763 | 19194948 |
| 3R | 26325465 | 26325769 | ../05_Mac | 18.64776 | 26325612 |
| 3R | 21794281 | 21794582 | ../05_Mac | 18.64003 | 21794393 |
| 2L | 12625118 | 12625558 | ../05_Mac | 18.63908 | 12625288 |
| 2R | 22160006 | 22160584 | ../05_Mac | 18.6344  | 22160137 |
| 3L | 12442858 | 12443159 | ../05_Mac | 18.6292  | 12443009 |
| 3L | 6822868  | 6823151  | ../05_Mac | 18.62613 | 6823025  |
| 2L | 491497   | 491825   | ../05_Mac | 18.61541 | 491614   |
| 3L | 18313653 | 18314032 | ../05_Mac | 18.6151  | 18313788 |
| 3R | 17709751 | 17710160 | ../05_Mac | 18.6151  | 17709918 |
| 3L | 11233340 | 11233662 | ../05_Mac | 18.60841 | 11233495 |
| 2R | 22326344 | 22326624 | ../05_Mac | 18.60726 | 22326503 |
| 3L | 4098368  | 4098668  | ../05_Mac | 18.60726 | 4098519  |
| 2L | 2784567  | 2784948  | ../05_Mac | 18.59092 | 2784739  |
| 2R | 17942698 | 17943029 | ../05_Mac | 18.58758 | 17942865 |
| 2R | 12751761 | 12752144 | ../05_Mac | 18.57574 | 12751981 |
| 3L | 7571163  | 7571557  | ../05_Mac | 18.56487 | 7571358  |
| 3R | 17444910 | 17445288 | ../05_Mac | 18.5629  | 17445025 |
| X  | 13325093 | 13325442 | ../05_Mac | 18.54855 | 13325255 |
| 2L | 5576599  | 5576946  | ../05_Mac | 18.54631 | 5576777  |
| 3R | 6642478  | 6642850  | ../05_Mac | 18.54631 | 6642659  |
| 3R | 27287411 | 27287715 | ../05_Mac | 18.5454  | 27287565 |
| 3R | 10053592 | 10053933 | ../05_Mac | 18.53685 | 10053772 |

|    |          |          |           |          |          |
|----|----------|----------|-----------|----------|----------|
| 3R | 31666324 | 31666656 | ../05_Mac | 18.53578 | 31666490 |
| 2L | 20973534 | 20973846 | ../05_Mac | 18.5302  | 20973659 |
| 3R | 28926634 | 28926989 | ../05_Mac | 18.5302  | 28926805 |
| 3R | 30864676 | 30865010 | ../05_Mac | 18.5302  | 30864838 |
| 3L | 13044818 | 13045084 | ../05_Mac | 18.5241  | 13044934 |
| 2L | 16888794 | 16889410 | ../05_Mac | 18.51497 | 16888978 |
| 2L | 16065941 | 16066265 | ../05_Mac | 18.51308 | 16066077 |
| 3L | 3769857  | 3770148  | ../05_Mac | 18.51308 | 3770025  |
| 2R | 5663583  | 5663974  | ../05_Mac | 18.51227 | 5663743  |
| 2L | 3479544  | 3479918  | ../05_Mac | 18.50982 | 3479725  |
| 3R | 23001900 | 23002276 | ../05_Mac | 18.50494 | 23002072 |
| 3L | 6796899  | 6797326  | ../05_Mac | 18.50456 | 6797148  |
| 2R | 5157991  | 5158325  | ../05_Mac | 18.48643 | 5158153  |
| 3L | 17010778 | 17011035 | ../05_Mac | 18.48584 | 17010908 |
| 3L | 11391354 | 11392097 | ../05_Mac | 18.48061 | 11391919 |
| 3R | 16423281 | 16423723 | ../05_Mac | 18.48061 | 16423535 |
| 3R | 21689634 | 21689891 | ../05_Mac | 18.47785 | 21689741 |
| 3R | 21813509 | 21813878 | ../05_Mac | 18.47785 | 21813690 |
| 3L | 6393271  | 6393608  | ../05_Mac | 18.46399 | 6393417  |
| 2L | 6767333  | 6767625  | ../05_Mac | 18.45314 | 6767475  |
| 3L | 630548   | 631052   | ../05_Mac | 18.43172 | 630905   |
| 2L | 6519898  | 6520227  | ../05_Mac | 18.42681 | 6520088  |
| 3L | 6188728  | 6189149  | ../05_Mac | 18.41877 | 6188933  |
| 2R | 5792666  | 5792977  | ../05_Mac | 18.41872 | 5792794  |
| 3R | 20998851 | 20999270 | ../05_Mac | 18.41872 | 20999037 |
| 2R | 12892668 | 12893084 | ../05_Mac | 18.40837 | 12892932 |
| 3L | 10396870 | 10397304 | ../05_Mac | 18.40149 | 10397067 |
| 2R | 19687835 | 19688662 | ../05_Mac | 18.39179 | 19688497 |
| 3R | 14458846 | 14459195 | ../05_Mac | 18.39179 | 14459010 |
| 2R | 11943291 | 11943627 | ../05_Mac | 18.37703 | 11943448 |
| 2R | 6844584  | 6844953  | ../05_Mac | 18.37613 | 6844763  |
| 3R | 25940709 | 25940996 | ../05_Mac | 18.37104 | 25940857 |
| 2L | 18678954 | 18679226 | ../05_Mac | 18.36494 | 18679097 |
| 2L | 6319060  | 6319385  | ../05_Mac | 18.35057 | 6319193  |
| 2L | 8785202  | 8785554  | ../05_Mac | 18.35057 | 8785390  |
| 2L | 14044094 | 14044588 | ../05_Mac | 18.35057 | 14044268 |
| 2L | 14133621 | 14134068 | ../05_Mac | 18.35057 | 14133755 |
| 2R | 500165   | 500421   | ../05_Mac | 18.35057 | 500292   |
| 2R | 1952990  | 1953241  | ../05_Mac | 18.35057 | 1953109  |
| 2R | 20449435 | 20449964 | ../05_Mac | 18.35057 | 20449810 |
| 2R | 20452416 | 20452684 | ../05_Mac | 18.35057 | 20452528 |
| 3L | 2056672  | 2056940  | ../05_Mac | 18.35057 | 2056803  |
| 3L | 9261551  | 9261800  | ../05_Mac | 18.35057 | 9261662  |
| 3L | 15385499 | 15385794 | ../05_Mac | 18.35057 | 15385652 |
| 3L | 22660273 | 22660527 | ../05_Mac | 18.35057 | 22660388 |
| 3L | 24073632 | 24074080 | ../05_Mac | 18.35057 | 24073778 |
| 3L | 26533198 | 26533458 | ../05_Mac | 18.35057 | 26533333 |
| 3R | 1931556  | 1931790  | ../05_Mac | 18.35057 | 1931670  |
| 3R | 7758642  | 7759163  | ../05_Mac | 18.35057 | 7758754  |

|    |          |          |           |          |          |
|----|----------|----------|-----------|----------|----------|
| 3R | 10939268 | 10939661 | ../05_Mac | 18.35057 | 10939424 |
| 3R | 16871980 | 16872268 | ../05_Mac | 18.35057 | 16872104 |
| 3R | 17918310 | 17918651 | ../05_Mac | 18.35057 | 17918505 |
| 3R | 22905025 | 22905380 | ../05_Mac | 18.35057 | 22905236 |
| 3R | 24501390 | 24501758 | ../05_Mac | 18.35057 | 24501566 |
| X  | 17123528 | 17124001 | ../05_Mac | 18.35057 | 17123831 |
| 2L | 3245797  | 3246299  | ../05_Mac | 18.3501  | 3246118  |
| 2R | 12739389 | 12739660 | ../05_Mac | 18.34656 | 12739539 |
| 3R | 9731608  | 9731923  | ../05_Mac | 18.34093 | 9731763  |
| 3R | 26879392 | 26879741 | ../05_Mac | 18.34045 | 26879552 |
| 2L | 5420219  | 5420644  | ../05_Mac | 18.33637 | 5420405  |
| 3L | 3581769  | 3582194  | ../05_Mac | 18.33637 | 3581941  |
| 3R | 6799299  | 6799627  | ../05_Mac | 18.33637 | 6799441  |
| 2R | 12639036 | 12639422 | ../05_Mac | 18.32028 | 12639222 |
| 3R | 18676588 | 18676846 | ../05_Mac | 18.31146 | 18676731 |
| 3R | 27183295 | 27184265 | ../05_Mac | 18.31077 | 27183442 |
| 3R | 21539466 | 21539837 | ../05_Mac | 18.3061  | 21539692 |
| 2L | 6425097  | 6425414  | ../05_Mac | 18.26977 | 6425222  |
| 2R | 19323519 | 19323820 | ../05_Mac | 18.26224 | 19323670 |
| 3L | 534082   | 534480   | ../05_Mac | 18.26224 | 534237   |
| 3L | 6589319  | 6589700  | ../05_Mac | 18.26224 | 6589533  |
| 2R | 17532441 | 17532765 | ../05_Mac | 18.25324 | 17532566 |
| 2L | 9632508  | 9632871  | ../05_Mac | 18.2517  | 9632697  |
| 2R | 14917218 | 14917549 | ../05_Mac | 18.24597 | 14917387 |
| 3L | 165736   | 166374   | ../05_Mac | 18.23928 | 165879   |
| 3R | 11171123 | 11171502 | ../05_Mac | 18.22354 | 11171309 |
| 3L | 11541638 | 11541962 | ../05_Mac | 18.21935 | 11541844 |
| 3R | 23428194 | 23428617 | ../05_Mac | 18.20206 | 23428427 |
| 3L | 20441077 | 20441411 | ../05_Mac | 18.201   | 20441242 |
| 3R | 26794307 | 26794635 | ../05_Mac | 18.1719  | 26794484 |
| 3R | 19575952 | 19576309 | ../05_Mac | 18.16773 | 19576150 |
| 2R | 5831854  | 5832229  | ../05_Mac | 18.13088 | 5832048  |
| 3R | 5042173  | 5042498  | ../05_Mac | 18.11842 | 5042308  |
| 2R | 13297926 | 13298231 | ../05_Mac | 18.1064  | 13298028 |
| 3R | 24450835 | 24451518 | ../05_Mac | 18.1064  | 24451065 |
| 2L | 18303782 | 18304096 | ../05_Mac | 18.09627 | 18303925 |
| 2R | 6559025  | 6559301  | ../05_Mac | 18.08518 | 6559151  |
| 3R | 13593993 | 13594335 | ../05_Mac | 18.0846  | 13594163 |
| 3L | 3796730  | 3797095  | ../05_Mac | 18.06732 | 3796928  |
| 3R | 19545813 | 19546139 | ../05_Mac | 18.06732 | 19545997 |
| 2R | 22011676 | 22012003 | ../05_Mac | 18.0442  | 22011854 |
| 3R | 16230300 | 16230692 | ../05_Mac | 18.01798 | 16230512 |
| 2R | 9046067  | 9046389  | ../05_Mac | 18.01601 | 9046227  |
| 2L | 13721408 | 13721748 | ../05_Mac | 18.0146  | 13721596 |
| 3R | 23237800 | 23238100 | ../05_Mac | 18.00213 | 23237930 |
| 2R | 8407230  | 8407700  | ../05_Mac | 18.00152 | 8407423  |
| 3R | 25582042 | 25582370 | ../05_Mac | 18.00127 | 25582200 |
| 3R | 13961340 | 13961680 | ../05_Mac | 17.9999  | 13961528 |
| 2L | 14785322 | 14785551 | ../05_Mac | 17.98889 | 14785440 |



|    |          |          |           |          |          |
|----|----------|----------|-----------|----------|----------|
| 2R | 15411281 | 15411679 | ../05_Mac | 17.98889 | 15411517 |
| 2R | 18868872 | 18869176 | ../05_Mac | 17.98889 | 18869020 |
| 2R | 23268365 | 23268648 | ../05_Mac | 17.98889 | 23268516 |
| 3L | 5998839  | 5999257  | ../05_Mac | 17.98889 | 5999004  |
| 3L | 6315589  | 6315852  | ../05_Mac | 17.98889 | 6315698  |
| 3R | 13533229 | 13533561 | ../05_Mac | 17.98889 | 13533410 |
| 3R | 18527960 | 18528559 | ../05_Mac | 17.98889 | 18528367 |
| 3R | 20456613 | 20456919 | ../05_Mac | 17.98889 | 20456792 |
| 3R | 28511094 | 28511398 | ../05_Mac | 17.98889 | 28511237 |
| 3R | 29467718 | 29468129 | ../05_Mac | 17.98889 | 29467808 |
| X  | 3052605  | 3052900  | ../05_Mac | 17.98889 | 3052762  |
| X  | 4625210  | 4625532  | ../05_Mac | 17.98889 | 4625339  |
| X  | 4877671  | 4877913  | ../05_Mac | 17.98889 | 4877784  |
| 3R | 11782146 | 11782429 | ../05_Mac | 17.98098 | 11782269 |
| 3L | 3295949  | 3296358  | ../05_Mac | 17.98018 | 3296204  |
| 3L | 12916969 | 12917775 | ../05_Mac | 17.98018 | 12917622 |
| 3L | 7111987  | 7112382  | ../05_Mac | 17.97268 | 7112156  |
| 2R | 16326082 | 16326603 | ../05_Mac | 17.97178 | 16326307 |
| 2L | 15348114 | 15348462 | ../05_Mac | 17.96396 | 15348310 |
| 2R | 14626351 | 14626799 | ../05_Mac | 17.96102 | 14626513 |
| 2R | 18919483 | 18919830 | ../05_Mac | 17.96102 | 18919646 |
| 2L | 20786002 | 20786297 | ../05_Mac | 17.95689 | 20786140 |
| 3R | 20488061 | 20488396 | ../05_Mac | 17.95469 | 20488234 |
| 3L | 16298098 | 16298619 | ../05_Mac | 17.95112 | 16298441 |
| 3L | 2021300  | 2021686  | ../05_Mac | 17.94769 | 2021548  |
| 2L | 19416300 | 19416825 | ../05_Mac | 17.93781 | 19416435 |
| 3L | 22140162 | 22140496 | ../05_Mac | 17.93364 | 22140330 |
| 3R | 24420972 | 24421956 | ../05_Mac | 17.92322 | 24421798 |
| 3R | 30063351 | 30063591 | ../05_Mac | 17.89088 | 30063465 |
| 2R | 19109458 | 19109752 | ../05_Mac | 17.88721 | 19109611 |
| 2L | 6195654  | 6196047  | ../05_Mac | 17.87886 | 6195789  |
| 3L | 10212571 | 10212989 | ../05_Mac | 17.87557 | 10212816 |
| 3R | 17762310 | 17762777 | ../05_Mac | 17.87557 | 17762607 |
| 2L | 20464711 | 20465042 | ../05_Mac | 17.8685  | 20464904 |
| 3L | 3750103  | 3750476  | ../05_Mac | 17.855   | 3750290  |
| 3L | 7780685  | 7780919  | ../05_Mac | 17.855   | 7780797  |
| 3R | 14971151 | 14971625 | ../05_Mac | 17.84676 | 14971451 |
| 2L | 10754776 | 10755107 | ../05_Mac | 17.83535 | 10754919 |
| 2R | 22990295 | 22990645 | ../05_Mac | 17.83535 | 22990452 |
| 2L | 15296334 | 15296784 | ../05_Mac | 17.83304 | 15296609 |
| 3R | 18072347 | 18072735 | ../05_Mac | 17.83304 | 18072525 |
| 3R | 25642374 | 25642658 | ../05_Mac | 17.81896 | 25642541 |
| 3R | 14406531 | 14407212 | ../05_Mac | 17.80933 | 14406697 |
| 2L | 6165899  | 6166285  | ../05_Mac | 17.80384 | 6166120  |
| 2R | 15810773 | 15811222 | ../05_Mac | 17.79175 | 15810924 |
| 2R | 23729996 | 23730396 | ../05_Mac | 17.78999 | 23730214 |
| 3R | 4164682  | 4165230  | ../05_Mac | 17.78987 | 4164878  |
| 2R | 21316429 | 21316749 | ../05_Mac | 17.78462 | 21316580 |
| 2L | 5308023  | 5308429  | ../05_Mac | 17.74975 | 5308193  |

|    |          |          |           |          |          |
|----|----------|----------|-----------|----------|----------|
| 3R | 5361958  | 5362340  | ../05_Mac | 17.74516 | 5362160  |
| 2L | 6635225  | 6635514  | ../05_Mac | 17.7444  | 6635401  |
| 3L | 11244921 | 11245370 | ../05_Mac | 17.72435 | 11245104 |
| 2L | 9194689  | 9194962  | ../05_Mac | 17.72099 | 9194851  |
| 3R | 26501087 | 26501502 | ../05_Mac | 17.71997 | 26501325 |
| 2L | 10584250 | 10584565 | ../05_Mac | 17.70646 | 10584395 |
| 2L | 7667912  | 7668210  | ../05_Mac | 17.69391 | 7668073  |
| 2R | 12535563 | 12535963 | ../05_Mac | 17.68889 | 12535736 |
| 3R | 18162356 | 18162631 | ../05_Mac | 17.67512 | 18162482 |
| 2L | 4033920  | 4034202  | ../05_Mac | 17.67118 | 4034065  |
| 3R | 7817772  | 7818085  | ../05_Mac | 17.67118 | 7817912  |
| 3R | 20582669 | 20582942 | ../05_Mac | 17.67006 | 20582805 |
| 2R | 22886680 | 22887033 | ../05_Mac | 17.66858 | 22886876 |
| 2R | 16775969 | 16776286 | ../05_Mac | 17.65961 | 16776090 |
| 3R | 22136862 | 22137115 | ../05_Mac | 17.65858 | 22136969 |
| 2R | 23785973 | 23786349 | ../05_Mac | 17.65774 | 23786141 |
| 3R | 6221225  | 6221715  | ../05_Mac | 17.65217 | 6221455  |
| 3R | 9214003  | 9214304  | ../05_Mac | 17.64047 | 9214135  |
| 2L | 1305816  | 1306381  | ../05_Mac | 17.6296  | 1306131  |
| 2L | 2081616  | 2081940  | ../05_Mac | 17.6296  | 2081801  |
| 2L | 10076794 | 10077391 | ../05_Mac | 17.6296  | 10076879 |
| 2L | 18873477 | 18873845 | ../05_Mac | 17.6296  | 18873680 |
| 2R | 8560653  | 8561031  | ../05_Mac | 17.6296  | 8560796  |
| 2R | 17934137 | 17934521 | ../05_Mac | 17.6296  | 17934289 |
| 3L | 24296846 | 24297151 | ../05_Mac | 17.6296  | 24297004 |
| 3L | 24348409 | 24348708 | ../05_Mac | 17.6296  | 24348552 |
| 3R | 6522196  | 6522505  | ../05_Mac | 17.6296  | 6522347  |
| 3R | 28460877 | 28461163 | ../05_Mac | 17.6296  | 28461017 |
| X  | 6192379  | 6192631  | ../05_Mac | 17.6296  | 6192490  |
| X  | 12615731 | 12615966 | ../05_Mac | 17.6296  | 12615817 |
| X  | 15601891 | 15602170 | ../05_Mac | 17.6296  | 15602024 |
| X  | 16658478 | 16658791 | ../05_Mac | 17.6296  | 16658662 |
| 3R | 7136120  | 7136485  | ../05_Mac | 17.62566 | 7136317  |
| 3R | 13525987 | 13526361 | ../05_Mac | 17.62566 | 13526169 |
| 2R | 22158056 | 22158557 | ../05_Mac | 17.60839 | 22158360 |
| 3R | 30027167 | 30027585 | ../05_Mac | 17.60839 | 30027355 |
| 2R | 20576299 | 20576718 | ../05_Mac | 17.59471 | 20576565 |
| 2L | 2564127  | 2564412  | ../05_Mac | 17.58427 | 2564256  |
| 3R | 19336099 | 19336394 | ../05_Mac | 17.58427 | 19336258 |
| 3R | 7319778  | 7320052  | ../05_Mac | 17.57949 | 7319934  |
| 3R | 9959285  | 9959596  | ../05_Mac | 17.57421 | 9959406  |
| 2L | 731617   | 731923   | ../05_Mac | 17.56847 | 731775   |
| 3L | 1285059  | 1285336  | ../05_Mac | 17.56847 | 1285196  |
| 3L | 22042300 | 22042591 | ../05_Mac | 17.56656 | 22042438 |
| 3L | 5961868  | 5962119  | ../05_Mac | 17.55425 | 5961978  |
| 2L | 10914279 | 10914871 | ../05_Mac | 17.54358 | 10914518 |
| 3L | 16034392 | 16034739 | ../05_Mac | 17.54358 | 16034582 |
| 3L | 21725261 | 21725531 | ../05_Mac | 17.53466 | 21725393 |
| 3L | 12988779 | 12989176 | ../05_Mac | 17.52986 | 12988962 |

|    |          |          |           |          |          |
|----|----------|----------|-----------|----------|----------|
| 2R | 24631510 | 24632134 | ../05_Mac | 17.52481 | 24631705 |
| 2L | 3022673  | 3022941  | ../05_Mac | 17.52316 | 3022793  |
| 3R | 7114090  | 7114773  | ../05_Mac | 17.49833 | 7114336  |
| 2L | 5696184  | 5696796  | ../05_Mac | 17.49164 | 5696356  |
| 3L | 6498343  | 6498636  | ../05_Mac | 17.47756 | 6498496  |
| 3L | 514536   | 515038   | ../05_Mac | 17.47699 | 514916   |
| 3R | 19919063 | 19919415 | ../05_Mac | 17.47699 | 19919250 |
| 2L | 12977161 | 12977436 | ../05_Mac | 17.47568 | 12977299 |
| 3L | 2632691  | 2633039  | ../05_Mac | 17.47348 | 2632845  |
| 2L | 12615935 | 12616336 | ../05_Mac | 17.45769 | 12616111 |
| 3L | 13426466 | 13426779 | ../05_Mac | 17.43233 | 13426598 |
| 3L | 2602105  | 2602404  | ../05_Mac | 17.424   | 2602280  |
| 3L | 14582635 | 14583127 | ../05_Mac | 17.424   | 14582819 |
| 3R | 10892465 | 10892836 | ../05_Mac | 17.42257 | 10892650 |
| 3R | 29915050 | 29915339 | ../05_Mac | 17.42058 | 29915154 |
| 2R | 11317876 | 11318122 | ../05_Mac | 17.41576 | 11317962 |
| 3L | 8984036  | 8984430  | ../05_Mac | 17.41234 | 8984262  |
| 3R | 14092204 | 14092489 | ../05_Mac | 17.38347 | 14092326 |
| 3R | 29855460 | 29855785 | ../05_Mac | 17.38098 | 29855626 |
| 2L | 12908171 | 12908475 | ../05_Mac | 17.38001 | 12908305 |
| 3L | 20836104 | 20836711 | ../05_Mac | 17.37939 | 20836503 |
| 3L | 8034892  | 8035202  | ../05_Mac | 17.37825 | 8035036  |
| 3R | 16900340 | 16900696 | ../05_Mac | 17.37814 | 16900535 |
| 3R | 9454946  | 9455220  | ../05_Mac | 17.3458  | 9455074  |
| 2L | 7663193  | 7663650  | ../05_Mac | 17.34073 | 7663365  |
| 2R | 19991485 | 19991812 | ../05_Mac | 17.33982 | 19991634 |
| 2L | 5320736  | 5321039  | ../05_Mac | 17.33654 | 5320876  |
| 2R | 18094461 | 18094970 | ../05_Mac | 17.33486 | 18094619 |
| 3R | 7056505  | 7056823  | ../05_Mac | 17.3299  | 7056652  |
| 2R | 6687014  | 6687377  | ../05_Mac | 17.32702 | 6687188  |
| 3L | 22052192 | 22052494 | ../05_Mac | 17.29977 | 22052335 |
| 3R | 15758730 | 15759096 | ../05_Mac | 17.29977 | 15758919 |
| 3L | 21198461 | 21198857 | ../05_Mac | 17.29747 | 21198711 |
| 3R | 21508495 | 21508917 | ../05_Mac | 17.28976 | 21508760 |
| 3R | 6576992  | 6577376  | ../05_Mac | 17.28753 | 6577223  |
| 3R | 9949030  | 9949427  | ../05_Mac | 17.28081 | 9949220  |
| 3L | 6975770  | 6976098  | ../05_Mac | 17.27524 | 6975988  |
| 2L | 6986492  | 6987162  | ../05_Mac | 17.27364 | 6986738  |
| 2L | 15557967 | 15558251 | ../05_Mac | 17.27364 | 15558125 |
| 2L | 21787160 | 21787610 | ../05_Mac | 17.27364 | 21787424 |
| 2R | 23259831 | 23260081 | ../05_Mac | 17.27364 | 23259957 |
| 3L | 2987431  | 2987726  | ../05_Mac | 17.27364 | 2987571  |
| 3L | 10489462 | 10489766 | ../05_Mac | 17.27364 | 10489657 |
| 3L | 12299776 | 12300063 | ../05_Mac | 17.27364 | 12299894 |
| 3L | 12993396 | 12993719 | ../05_Mac | 17.27364 | 12993554 |
| 3L | 18701288 | 18701598 | ../05_Mac | 17.27364 | 18701409 |
| 3R | 11493301 | 11493547 | ../05_Mac | 17.27364 | 11493385 |
| 3R | 22879194 | 22879576 | ../05_Mac | 17.27364 | 22879386 |
| 3R | 23489212 | 23489644 | ../05_Mac | 17.27364 | 23489340 |

|    |          |          |           |          |          |
|----|----------|----------|-----------|----------|----------|
| 3R | 28552455 | 28552760 | ../05_Mac | 17.27364 | 28552571 |
| X  | 4394966  | 4395250  | ../05_Mac | 17.27364 | 4395097  |
| X  | 6480799  | 6481103  | ../05_Mac | 17.27364 | 6480952  |
| X  | 8703265  | 8703538  | ../05_Mac | 17.27364 | 8703366  |
| X  | 17969883 | 17970126 | ../05_Mac | 17.27364 | 17970033 |
| X  | 19992202 | 19992757 | ../05_Mac | 17.27364 | 19992383 |
| 3R | 6531623  | 6532268  | ../05_Mac | 17.25842 | 6532081  |
| 2L | 18870229 | 18870659 | ../05_Mac | 17.24434 | 18870439 |
| 3R | 27682600 | 27683196 | ../05_Mac | 17.24341 | 27682982 |
| 2L | 14198216 | 14198585 | ../05_Mac | 17.2403  | 14198383 |
| 3L | 11310379 | 11310723 | ../05_Mac | 17.23811 | 11310537 |
| 3L | 4552301  | 4552639  | ../05_Mac | 17.23005 | 4552463  |
| 2L | 19527879 | 19528337 | ../05_Mac | 17.22936 | 19528199 |
| 3L | 17547041 | 17547337 | ../05_Mac | 17.2286  | 17547183 |
| 2L | 5894560  | 5894930  | ../05_Mac | 17.22542 | 5894749  |
| 2R | 10115695 | 10115984 | ../05_Mac | 17.22542 | 10115860 |
| 3R | 30017623 | 30017949 | ../05_Mac | 17.22424 | 30017773 |
| 2R | 15645878 | 15646143 | ../05_Mac | 17.22335 | 15646009 |
| 3L | 6971638  | 6972082  | ../05_Mac | 17.18313 | 6971845  |
| 3L | 3697157  | 3697535  | ../05_Mac | 17.17085 | 3697350  |
| 2L | 18217436 | 18217783 | ../05_Mac | 17.16466 | 18217594 |
| 2R | 12847296 | 12847949 | ../05_Mac | 17.15673 | 12847783 |
| 2R | 22209361 | 22209597 | ../05_Mac | 17.15452 | 22209464 |
| 3L | 22902518 | 22902805 | ../05_Mac | 17.15376 | 22902657 |
| 2L | 19977203 | 19977553 | ../05_Mac | 17.15277 | 19977388 |
| 2R | 14310281 | 14310885 | ../05_Mac | 17.14318 | 14310567 |
| 3R | 14867377 | 14867837 | ../05_Mac | 17.12984 | 14867533 |
| 2R | 9600000  | 9600299  | ../05_Mac | 17.12871 | 9600142  |
| 2L | 7401901  | 7402155  | ../05_Mac | 17.12732 | 7402014  |
| 3R | 10186795 | 10187144 | ../05_Mac | 17.12731 | 10186938 |
| 3L | 14119691 | 14120182 | ../05_Mac | 17.1184  | 14119881 |
| 2R | 4337515  | 4337838  | ../05_Mac | 17.10861 | 4337700  |
| 2L | 13971123 | 13971541 | ../05_Mac | 17.10633 | 13971330 |
| 2R | 11325192 | 11325691 | ../05_Mac | 17.10633 | 11325505 |
| 3R | 14093900 | 14094206 | ../05_Mac | 17.10532 | 14094066 |
| 3R | 15207762 | 15208048 | ../05_Mac | 17.10532 | 15207890 |
| 3R | 17361018 | 17361345 | ../05_Mac | 17.10074 | 17361129 |
| 3R | 10242497 | 10242772 | ../05_Mac | 17.08739 | 10242616 |
| 3R | 23371248 | 23371608 | ../05_Mac | 17.08071 | 23371382 |
| 3L | 1857551  | 1857882  | ../05_Mac | 17.07831 | 1857746  |
| 3L | 10643123 | 10643453 | ../05_Mac | 17.07551 | 10643296 |
| 2R | 21912737 | 21913112 | ../05_Mac | 17.06372 | 21912959 |
| 3R | 14378687 | 14378966 | ../05_Mac | 17.06372 | 14378834 |
| 2L | 15986460 | 15986759 | ../05_Mac | 17.04058 | 15986643 |
| 3R | 16407815 | 16408263 | ../05_Mac | 17.04058 | 16407974 |
| 3R | 26854685 | 26855017 | ../05_Mac | 17.04058 | 26854826 |
| 3R | 27301562 | 27301884 | ../05_Mac | 17.04058 | 27301720 |
| 3R | 10926499 | 10926804 | ../05_Mac | 17.04055 | 10926662 |
| 3L | 8670245  | 8670623  | ../05_Mac | 17.03144 | 8670392  |

|    |          |          |           |          |          |
|----|----------|----------|-----------|----------|----------|
| 3L | 9917784  | 9918093  | ../05_Mac | 17.02888 | 9917953  |
| 3R | 19655300 | 19655704 | ../05_Mac | 17.02888 | 19655505 |
| 2L | 22978112 | 22978459 | ../05_Mac | 17.01383 | 22978245 |
| 3L | 5635141  | 5635366  | ../05_Mac | 17.01383 | 5635228  |
| 2R | 7427448  | 7427802  | ../05_Mac | 17.01321 | 7427535  |
| 3R | 27176566 | 27176962 | ../05_Mac | 17.00509 | 27176874 |
| 3R | 23366009 | 23366286 | ../05_Mac | 17.00075 | 23366143 |
| 2R | 6950400  | 6950692  | ../05_Mac | 16.99798 | 6950573  |
| 3L | 5482846  | 5483369  | ../05_Mac | 16.987   | 5483080  |
| 3L | 7525551  | 7525786  | ../05_Mac | 16.97228 | 7525677  |
| 2L | 5004834  | 5005117  | ../05_Mac | 16.96968 | 5004950  |
| 3L | 13142283 | 13142662 | ../05_Mac | 16.95879 | 13142438 |
| 3L | 24983859 | 24984118 | ../05_Mac | 16.95879 | 24984000 |
| 3R | 23584207 | 23584541 | ../05_Mac | 16.95879 | 23584416 |
| 3L | 7129051  | 7129387  | ../05_Mac | 16.94984 | 7129210  |
| 3R | 19938058 | 19938321 | ../05_Mac | 16.94984 | 19938208 |
| 3R | 21795101 | 21795583 | ../05_Mac | 16.92898 | 21795345 |
| 3L | 12334578 | 12335298 | ../05_Mac | 16.9281  | 12334753 |
| 3R | 8342669  | 8342984  | ../05_Mac | 16.92687 | 8342774  |
| 2R | 24768742 | 24769019 | ../05_Mac | 16.92057 | 24768882 |
| 2R | 8343640  | 8343974  | ../05_Mac | 16.92046 | 8343810  |
| 2R | 23263852 | 23264214 | ../05_Mac | 16.92046 | 23264028 |
| 3L | 13588533 | 13588863 | ../05_Mac | 16.92046 | 13588668 |
| 3R | 8964518  | 8964828  | ../05_Mac | 16.92046 | 8964672  |
| 3R | 17734041 | 17734349 | ../05_Mac | 16.92046 | 17734137 |
| 3R | 28096395 | 28096830 | ../05_Mac | 16.92046 | 28096674 |
| X  | 13328099 | 13328367 | ../05_Mac | 16.92046 | 13328216 |
| X  | 15807277 | 15807535 | ../05_Mac | 16.92046 | 15807421 |
| X  | 19856627 | 19856892 | ../05_Mac | 16.92046 | 19856759 |
| X  | 20711362 | 20711667 | ../05_Mac | 16.92046 | 20711493 |
| 3R | 26084675 | 26085040 | ../05_Mac | 16.90431 | 26084888 |
| 2L | 20047179 | 20047503 | ../05_Mac | 16.90125 | 20047344 |
| 3L | 2593652  | 2594018  | ../05_Mac | 16.88462 | 2593864  |
| 3L | 5499414  | 5499709  | ../05_Mac | 16.88457 | 5499572  |
| 2L | 3970670  | 3971086  | ../05_Mac | 16.88061 | 3970932  |
| 2L | 4202971  | 4203347  | ../05_Mac | 16.88061 | 4203201  |
| 3L | 20633766 | 20634446 | ../05_Mac | 16.88061 | 20633923 |
| X  | 8435844  | 8436145  | ../05_Mac | 16.88061 | 8436000  |
| 3L | 16897491 | 16897851 | ../05_Mac | 16.87907 | 16897697 |
| 3L | 21545873 | 21546354 | ../05_Mac | 16.87907 | 21546019 |
| 3R | 19870205 | 19870802 | ../05_Mac | 16.87907 | 19870621 |
| 2L | 7669819  | 7670221  | ../05_Mac | 16.87869 | 7670032  |
| 3R | 10916269 | 10916586 | ../05_Mac | 16.87216 | 10916409 |
| 2L | 16389940 | 16390311 | ../05_Mac | 16.85616 | 16390135 |
| 2R | 20309473 | 20309815 | ../05_Mac | 16.84564 | 20309700 |
| 3R | 11818591 | 11818948 | ../05_Mac | 16.84564 | 11818846 |
| 3R | 15117932 | 15118277 | ../05_Mac | 16.84564 | 15118111 |
| 2R | 12021278 | 12021557 | ../05_Mac | 16.84336 | 12021427 |
| 3L | 23949230 | 23949806 | ../05_Mac | 16.84336 | 23949473 |

|    |          |          |           |          |          |
|----|----------|----------|-----------|----------|----------|
| 3R | 30232573 | 30232909 | ../05_Mac | 16.84336 | 30232715 |
| 2R | 12800791 | 12801092 | ../05_Mac | 16.8404  | 12800929 |
| 3R | 26634105 | 26634423 | ../05_Mac | 16.8404  | 26634245 |
| 3R | 14540670 | 14541046 | ../05_Mac | 16.83809 | 14540857 |
| 3R | 21292778 | 21293097 | ../05_Mac | 16.83809 | 21292910 |
| 3R | 5770804  | 5771182  | ../05_Mac | 16.83614 | 5771020  |
| 3L | 6112779  | 6113242  | ../05_Mac | 16.83279 | 6113052  |
| 3R | 7721209  | 7721828  | ../05_Mac | 16.8297  | 7721731  |
| 3L | 12080576 | 12080976 | ../05_Mac | 16.82522 | 12080725 |
| 3R | 22254644 | 22254896 | ../05_Mac | 16.82251 | 22254762 |
| 2L | 1634338  | 1634606  | ../05_Mac | 16.8004  | 1634467  |
| 2L | 9918049  | 9918378  | ../05_Mac | 16.7967  | 9918210  |
| 2L | 7355297  | 7355635  | ../05_Mac | 16.7906  | 7355415  |
| 2L | 14056185 | 14056582 | ../05_Mac | 16.78734 | 14056326 |
| 2R | 19773043 | 19773350 | ../05_Mac | 16.78719 | 19773230 |
| 3R | 5178631  | 5178957  | ../05_Mac | 16.77971 | 5178819  |
| 2L | 13016531 | 13017389 | ../05_Mac | 16.77872 | 13017234 |
| 2R | 18288253 | 18288513 | ../05_Mac | 16.76017 | 18288373 |
| 2L | 9868529  | 9868847  | ../05_Mac | 16.75518 | 9868704  |
| 3R | 11898614 | 11898880 | ../05_Mac | 16.75518 | 11898727 |
| 3R | 13792106 | 13792586 | ../05_Mac | 16.75518 | 13792226 |
| 2R | 13806206 | 13806644 | ../05_Mac | 16.74378 | 13806483 |
| 3R | 13865200 | 13865459 | ../05_Mac | 16.71214 | 13865304 |
| 3L | 12948746 | 12949111 | ../05_Mac | 16.71134 | 12948935 |
| 3R | 20203447 | 20203752 | ../05_Mac | 16.70325 | 20203629 |
| 2R | 16166819 | 16167104 | ../05_Mac | 16.70302 | 16166968 |
| 3R | 12356782 | 12357180 | ../05_Mac | 16.69702 | 12356980 |
| 3L | 18367525 | 18367790 | ../05_Mac | 16.69616 | 18367692 |
| 3R | 28727535 | 28728175 | ../05_Mac | 16.69616 | 28727880 |
| 3L | 1865828  | 1866237  | ../05_Mac | 16.68927 | 1865973  |
| 2R | 10736665 | 10736923 | ../05_Mac | 16.68201 | 10736770 |
| 2R | 11946799 | 11947115 | ../05_Mac | 16.66165 | 11946961 |
| 3L | 8223416  | 8223752  | ../05_Mac | 16.66165 | 8223562  |
| 3R | 26495055 | 26495402 | ../05_Mac | 16.6405  | 26495225 |
| 3L | 17397774 | 17398078 | ../05_Mac | 16.63994 | 17397943 |
| 3R | 11608047 | 11608365 | ../05_Mac | 16.63892 | 11608196 |
| 2L | 20879183 | 20879582 | ../05_Mac | 16.63476 | 20879402 |
| 2L | 19610317 | 19610706 | ../05_Mac | 16.62401 | 19610519 |
| 3R | 20128652 | 20129002 | ../05_Mac | 16.62401 | 20128804 |
| 2L | 15740088 | 15740554 | ../05_Mac | 16.617   | 15740391 |
| 3L | 12314194 | 12314480 | ../05_Mac | 16.617   | 12314344 |
| 2R | 20259516 | 20259867 | ../05_Mac | 16.6012  | 20259683 |
| 3R | 26724101 | 26724365 | ../05_Mac | 16.59441 | 26724223 |
| 3L | 3941325  | 3941614  | ../05_Mac | 16.58418 | 3941487  |
| 2R | 11239528 | 11239775 | ../05_Mac | 16.58409 | 11239662 |
| 2L | 8347243  | 8347532  | ../05_Mac | 16.58056 | 8347378  |
| 3R | 22665501 | 22665785 | ../05_Mac | 16.58056 | 22665672 |
| 2L | 1259025  | 1259287  | ../05_Mac | 16.56961 | 1259139  |
| 2L | 9302296  | 9302634  | ../05_Mac | 16.56961 | 9302437  |

|    |          |          |           |          |          |
|----|----------|----------|-----------|----------|----------|
| 3L | 1687996  | 1688249  | ../05_Mac | 16.56961 | 1688122  |
| 3L | 22529773 | 22530079 | ../05_Mac | 16.56961 | 22529939 |
| 3R | 10618017 | 10618365 | ../05_Mac | 16.56961 | 10618151 |
| 3R | 11492332 | 11492890 | ../05_Mac | 16.56961 | 11492558 |
| 3R | 12808897 | 12809137 | ../05_Mac | 16.56961 | 12809012 |
| 3R | 18055338 | 18055689 | ../05_Mac | 16.56961 | 18055511 |
| 3R | 27731680 | 27732062 | ../05_Mac | 16.56961 | 27731911 |
| 3R | 28041422 | 28041857 | ../05_Mac | 16.56961 | 28041732 |
| X  | 668626   | 668869   | ../05_Mac | 16.56961 | 668738   |
| X  | 3191224  | 3191511  | ../05_Mac | 16.56961 | 3191352  |
| X  | 20577934 | 20578193 | ../05_Mac | 16.56961 | 20578033 |
| X  | 22916925 | 22917377 | ../05_Mac | 16.56961 | 22917076 |
| 2R | 16617860 | 16618169 | ../05_Mac | 16.56024 | 16618048 |
| 2L | 4104914  | 4105527  | ../05_Mac | 16.54021 | 4105407  |
| 3R | 30612051 | 30612369 | ../05_Mac | 16.54021 | 30612210 |
| 3L | 4159256  | 4159538  | ../05_Mac | 16.53994 | 4159374  |
| 3L | 9024075  | 9024352  | ../05_Mac | 16.53994 | 9024184  |
| 3R | 22502138 | 22502511 | ../05_Mac | 16.53994 | 22502316 |
| 3R | 27750760 | 27751055 | ../05_Mac | 16.53994 | 27750925 |
| 2L | 18130872 | 18131174 | ../05_Mac | 16.53422 | 18131033 |
| 3R | 21492698 | 21493213 | ../05_Mac | 16.52451 | 21493042 |
| 2L | 8890603  | 8890908  | ../05_Mac | 16.49939 | 8890755  |
| 2R | 7368964  | 7369494  | ../05_Mac | 16.48355 | 7369284  |
| 2L | 5403405  | 5404286  | ../05_Mac | 16.47711 | 5403584  |
| 3R | 25976952 | 25977306 | ../05_Mac | 16.47711 | 25977101 |
| 3L | 14731279 | 14731651 | ../05_Mac | 16.47352 | 14731481 |
| 3R | 20741087 | 20741466 | ../05_Mac | 16.47352 | 20741286 |
| 3L | 16562404 | 16562670 | ../05_Mac | 16.46329 | 16562520 |
| 3L | 12742842 | 12743243 | ../05_Mac | 16.46027 | 12743062 |
| 3R | 5884569  | 5885101  | ../05_Mac | 16.45391 | 5884936  |
| 3R | 24963991 | 24964322 | ../05_Mac | 16.45391 | 24964184 |
| 3L | 7093402  | 7093686  | ../05_Mac | 16.45173 | 7093498  |
| 3L | 18130444 | 18130754 | ../05_Mac | 16.43638 | 18130598 |
| 3L | 22782359 | 22782669 | ../05_Mac | 16.43288 | 22782524 |
| 2L | 9114962  | 9115461  | ../05_Mac | 16.42967 | 9115288  |
| 2L | 8867118  | 8867410  | ../05_Mac | 16.42886 | 8867285  |
| 3L | 21867747 | 21868038 | ../05_Mac | 16.42886 | 21867906 |
| 2L | 13697858 | 13698193 | ../05_Mac | 16.42405 | 13698011 |
| 3L | 460680   | 461037   | ../05_Mac | 16.42155 | 460927   |
| 3L | 20788854 | 20789208 | ../05_Mac | 16.4115  | 20789027 |
| 3L | 11641222 | 11641542 | ../05_Mac | 16.40849 | 11641411 |
| 2L | 1640556  | 1640896  | ../05_Mac | 16.40336 | 1640754  |
| 3R | 5396381  | 5396641  | ../05_Mac | 16.38494 | 5396471  |
| 2R | 18250872 | 18251135 | ../05_Mac | 16.3757  | 18250998 |
| 3R | 27177356 | 27177634 | ../05_Mac | 16.36857 | 27177492 |
| 3L | 20024878 | 20025249 | ../05_Mac | 16.35685 | 20025029 |
| 2L | 3030848  | 3031226  | ../05_Mac | 16.35544 | 3031031  |
| 3L | 13315173 | 13315411 | ../05_Mac | 16.35267 | 13315284 |
| 3R | 26620666 | 26620914 | ../05_Mac | 16.33781 | 26620778 |

|    |          |          |           |          |          |
|----|----------|----------|-----------|----------|----------|
| 3R | 29227519 | 29227871 | ../05_Mac | 16.30529 | 29227673 |
| 3R | 20785988 | 20786284 | ../05_Mac | 16.28978 | 20786120 |
| 2L | 4571288  | 4571593  | ../05_Mac | 16.28398 | 4571455  |
| 3L | 13888705 | 13889148 | ../05_Mac | 16.28398 | 13888936 |
| 3R | 10920363 | 10920682 | ../05_Mac | 16.28398 | 10920543 |
| 3R | 24000397 | 24000710 | ../05_Mac | 16.2653  | 24000553 |
| 3R | 12266995 | 12267305 | ../05_Mac | 16.25943 | 12267128 |
| 2L | 4750496  | 4750846  | ../05_Mac | 16.25848 | 4750681  |
| 2R | 19974462 | 19974784 | ../05_Mac | 16.25162 | 19974622 |
| 3L | 21868868 | 21869108 | ../05_Mac | 16.25162 | 21868984 |
| 3R | 17769633 | 17769915 | ../05_Mac | 16.25162 | 17769773 |
| 2L | 6447708  | 6448041  | ../05_Mac | 16.2483  | 6447850  |
| 3R | 10452886 | 10453243 | ../05_Mac | 16.24171 | 10453056 |
| 3R | 16802900 | 16803229 | ../05_Mac | 16.24171 | 16803045 |
| 3R | 22325916 | 22326210 | ../05_Mac | 16.24171 | 22326071 |
| 2R | 15269013 | 15269537 | ../05_Mac | 16.24043 | 15269223 |
| 3L | 7633455  | 7633770  | ../05_Mac | 16.23153 | 7633605  |
| 3L | 283150   | 283495   | ../05_Mac | 16.22879 | 283337   |
| 3L | 3939640  | 3940273  | ../05_Mac | 16.22366 | 3939819  |
| 3L | 8513558  | 8513857  | ../05_Mac | 16.22309 | 8513738  |
| 2L | 897886   | 898121   | ../05_Mac | 16.22162 | 897975   |
| 2L | 4627879  | 4628212  | ../05_Mac | 16.22162 | 4628040  |
| 2L | 12933631 | 12933887 | ../05_Mac | 16.22162 | 12933794 |
| 2L | 18072272 | 18072811 | ../05_Mac | 16.22162 | 18072462 |
| 2R | 1366677  | 1366984  | ../05_Mac | 16.22162 | 1366800  |
| 2R | 24247037 | 24247368 | ../05_Mac | 16.22162 | 24247197 |
| 3L | 16360276 | 16360567 | ../05_Mac | 16.22162 | 16360449 |
| 3L | 19377143 | 19377611 | ../05_Mac | 16.22162 | 19377444 |
| 3R | 3385375  | 3385674  | ../05_Mac | 16.22162 | 3385477  |
| 3R | 19538820 | 19539428 | ../05_Mac | 16.22162 | 19538977 |
| X  | 10574349 | 10574674 | ../05_Mac | 16.22162 | 10574562 |
| X  | 11894050 | 11894312 | ../05_Mac | 16.22162 | 11894191 |
| X  | 12425223 | 12425455 | ../05_Mac | 16.22162 | 12425334 |
| X  | 13236410 | 13236672 | ../05_Mac | 16.22162 | 13236540 |
| X  | 20686599 | 20686848 | ../05_Mac | 16.22162 | 20686727 |
| 3L | 22880363 | 22880646 | ../05_Mac | 16.21342 | 22880516 |
| 3L | 5957697  | 5958017  | ../05_Mac | 16.21121 | 5957833  |
| 3R | 26367757 | 26368086 | ../05_Mac | 16.21121 | 26367914 |
| 2R | 12309743 | 12309989 | ../05_Mac | 16.21032 | 12309868 |
| 2L | 8578223  | 8578829  | ../05_Mac | 16.20498 | 8578603  |
| 3R | 8790797  | 8791087  | ../05_Mac | 16.19723 | 8790927  |
| 3R | 23363124 | 23363517 | ../05_Mac | 16.18434 | 23363325 |
| 2R | 15219493 | 15219748 | ../05_Mac | 16.18348 | 15219622 |
| 4  | 882705   | 883237   | ../05_Mac | 16.18348 | 883067   |
| 2R | 16377932 | 16378301 | ../05_Mac | 16.1828  | 16378049 |
| 3R | 11625524 | 11625854 | ../05_Mac | 16.18113 | 11625709 |
| 2L | 5608112  | 5608479  | ../05_Mac | 16.16656 | 5608281  |
| 2L | 12760828 | 12761290 | ../05_Mac | 16.16656 | 12760982 |
| 3R | 6591201  | 6591449  | ../05_Mac | 16.16656 | 6591343  |



|    |          |          |           |          |          |
|----|----------|----------|-----------|----------|----------|
| 3L | 20921432 | 20921939 | ../05_Mac | 16.16583 | 20921795 |
| 2R | 13182230 | 13182519 | ../05_Mac | 16.15055 | 13182389 |
| 3R | 12675190 | 12675467 | ../05_Mac | 16.15055 | 12675327 |
| 3R | 15159915 | 15160271 | ../05_Mac | 16.15055 | 15160107 |
| 3L | 20987280 | 20987513 | ../05_Mac | 16.15021 | 20987417 |
| 3L | 17162725 | 17163086 | ../05_Mac | 16.10396 | 17162936 |
| 2L | 3786842  | 3787164  | ../05_Mac | 16.09949 | 3787070  |
| 3L | 7348789  | 7349081  | ../05_Mac | 16.08884 | 7348956  |
| 2R | 9476584  | 9476891  | ../05_Mac | 16.08519 | 9476735  |
| 3L | 21691960 | 21692343 | ../05_Mac | 16.08519 | 21692184 |
| 3R | 11738642 | 11739241 | ../05_Mac | 16.08443 | 11739057 |
| 3L | 4419916  | 4420146  | ../05_Mac | 16.08033 | 4420006  |
| 3R | 11488877 | 11489174 | ../05_Mac | 16.07828 | 11489051 |
| 2L | 1417345  | 1417584  | ../05_Mac | 16.07771 | 1417475  |
| 2L | 17976911 | 17977213 | ../05_Mac | 16.07034 | 17977061 |
| 3L | 3648308  | 3648659  | ../05_Mac | 16.07034 | 3648482  |
| 2L | 13401756 | 13402000 | ../05_Mac | 16.05972 | 13401863 |
| 3L | 10749116 | 10749387 | ../05_Mac | 16.05972 | 10749203 |
| 3R | 6579497  | 6579743  | ../05_Mac | 16.05972 | 6579621  |
| 3R | 23505294 | 23506103 | ../05_Mac | 16.05972 | 23505867 |
| 3L | 11629287 | 11629535 | ../05_Mac | 16.04438 | 11629428 |
| 3R | 21472589 | 21473172 | ../05_Mac | 16.03884 | 21473003 |
| 3L | 20426629 | 20426905 | ../05_Mac | 16.03796 | 20426759 |
| 2L | 4677481  | 4677879  | ../05_Mac | 16.03637 | 4677718  |
| 2R | 23436217 | 23436499 | ../05_Mac | 16.03637 | 23436377 |
| 3L | 15295373 | 15295714 | ../05_Mac | 16.03637 | 15295540 |
| 2L | 4400605  | 4400864  | ../05_Mac | 16.02274 | 4400752  |
| 3R | 23373016 | 23373385 | ../05_Mac | 16.02111 | 23373154 |
| 2R | 25112394 | 25112652 | ../05_Mac | 16.01484 | 25112515 |
| 3R | 19293730 | 19294150 | ../05_Mac | 15.99325 | 19293884 |
| 3R | 15798177 | 15798527 | ../05_Mac | 15.98736 | 15798359 |
| 3L | 1024746  | 1024970  | ../05_Mac | 15.98645 | 1024852  |
| 3R | 7504256  | 7504543  | ../05_Mac | 15.98271 | 7504410  |
| 3L | 713439   | 713754   | ../05_Mac | 15.97525 | 713595   |
| 2R | 8590924  | 8591200  | ../05_Mac | 15.97001 | 8591093  |
| 3L | 7080878  | 7081147  | ../05_Mac | 15.95924 | 7081033  |
| 2R | 16051940 | 16052223 | ../05_Mac | 15.95626 | 16052053 |
| 3R | 22650833 | 22651222 | ../05_Mac | 15.95092 | 22651040 |
| 2R | 14918755 | 14919081 | ../05_Mac | 15.94842 | 14918906 |
| 3R | 8359275  | 8359536  | ../05_Mac | 15.94842 | 8359405  |
| 2L | 19007833 | 19008068 | ../05_Mac | 15.94322 | 19007929 |
| 2L | 651753   | 652117   | ../05_Mac | 15.92781 | 651950   |
| 2L | 11937326 | 11937647 | ../05_Mac | 15.91864 | 11937483 |
| 3R | 30228994 | 30229331 | ../05_Mac | 15.91864 | 30229166 |
| 3L | 16982044 | 16982335 | ../05_Mac | 15.91547 | 16982158 |
| 3R | 30490978 | 30491326 | ../05_Mac | 15.91547 | 30491188 |
| 2R | 11981708 | 11982018 | ../05_Mac | 15.90736 | 11981819 |
| 2R | 18283404 | 18283690 | ../05_Mac | 15.90254 | 18283551 |
| 3R | 25429662 | 25429960 | ../05_Mac | 15.89192 | 25429816 |

|    |          |          |           |          |          |
|----|----------|----------|-----------|----------|----------|
| 3R | 22734292 | 22734538 | ../05_Mac | 15.88249 | 22734415 |
| 3L | 18479412 | 18480032 | ../05_Mac | 15.88076 | 18479848 |
| 2L | 5422444  | 5422755  | ../05_Mac | 15.87637 | 5422610  |
| 2L | 22311772 | 22312025 | ../05_Mac | 15.87637 | 22311905 |
| 2R | 2092167  | 2092416  | ../05_Mac | 15.87637 | 2092318  |
| 3L | 15395118 | 15395479 | ../05_Mac | 15.87637 | 15395288 |
| 3R | 3077732  | 3078003  | ../05_Mac | 15.87637 | 3077880  |
| 3R | 21385145 | 21385378 | ../05_Mac | 15.87637 | 21385240 |
| 3R | 23023291 | 23023601 | ../05_Mac | 15.87637 | 23023472 |
| 3R | 27450694 | 27451145 | ../05_Mac | 15.87637 | 27450894 |
| X  | 538279   | 538786   | ../05_Mac | 15.87637 | 538507   |
| X  | 1175375  | 1175715  | ../05_Mac | 15.87637 | 1175601  |
| X  | 16487416 | 16487717 | ../05_Mac | 15.87637 | 16487534 |
| X  | 20123246 | 20123778 | ../05_Mac | 15.87637 | 20123312 |
| 3R | 11941709 | 11941979 | ../05_Mac | 15.87531 | 11941864 |
| 3R | 7356342  | 7356762  | ../05_Mac | 15.86771 | 7356473  |
| 3L | 873194   | 873506   | ../05_Mac | 15.83932 | 873345   |
| 3R | 28536114 | 28536878 | ../05_Mac | 15.8389  | 28536654 |
| 3R | 29745783 | 29746176 | ../05_Mac | 15.83842 | 29746015 |
| 2R | 20458809 | 20459103 | ../05_Mac | 15.83799 | 20458941 |
| 3L | 22658981 | 22659267 | ../05_Mac | 15.83799 | 22659101 |
| 3R | 22522631 | 22522955 | ../05_Mac | 15.83799 | 22522791 |
| 3R | 16172670 | 16173142 | ../05_Mac | 15.83671 | 16172900 |
| 3R | 25701875 | 25702171 | ../05_Mac | 15.83607 | 25702013 |
| 3R | 27964469 | 27964782 | ../05_Mac | 15.8355  | 27964623 |
| 3L | 22470869 | 22471146 | ../05_Mac | 15.82391 | 22471032 |
| 2R | 9494893  | 9495211  | ../05_Mac | 15.80865 | 9495065  |
| 3L | 9786878  | 9787165  | ../05_Mac | 15.80865 | 9787050  |
| 3L | 4131592  | 4131906  | ../05_Mac | 15.79735 | 4131742  |
| 2R | 8410441  | 8411142  | ../05_Mac | 15.79475 | 8410630  |
| 3L | 20562013 | 20562347 | ../05_Mac | 15.79475 | 20562206 |
| 3R | 20199231 | 20199881 | ../05_Mac | 15.79475 | 20199682 |
| 2L | 9061632  | 9061907  | ../05_Mac | 15.79219 | 9061759  |
| 3R | 12034819 | 12035452 | ../05_Mac | 15.78367 | 12034985 |
| 3R | 28137172 | 28137471 | ../05_Mac | 15.78333 | 28137311 |
| 3L | 3311699  | 3312004  | ../05_Mac | 15.77614 | 3311842  |
| 3R | 24650602 | 24650919 | ../05_Mac | 15.77614 | 24650726 |
| 3L | 16653646 | 16654022 | ../05_Mac | 15.76339 | 16653839 |
| 3R | 26440827 | 26441105 | ../05_Mac | 15.76339 | 26440928 |
| 3R | 32026990 | 32027372 | ../05_Mac | 15.76302 | 32027173 |
| 2R | 22718166 | 22718453 | ../05_Mac | 15.76051 | 22718299 |
| 2R | 5962208  | 5962498  | ../05_Mac | 15.75063 | 5962311  |
| 3R | 31109986 | 31110287 | ../05_Mac | 15.7418  | 31110140 |
| 3R | 15554447 | 15554768 | ../05_Mac | 15.7411  | 15554595 |
| 2L | 15882092 | 15882449 | ../05_Mac | 15.73795 | 15882265 |
| 3L | 4631037  | 4631301  | ../05_Mac | 15.73579 | 4631131  |
| 2L | 554267   | 554535   | ../05_Mac | 15.73543 | 554377   |
| 2L | 3987211  | 3987556  | ../05_Mac | 15.70676 | 3987386  |
| 3L | 11914979 | 11915257 | ../05_Mac | 15.70676 | 11915129 |

|    |          |          |           |          |          |
|----|----------|----------|-----------|----------|----------|
| 3R | 13350716 | 13351030 | ../05_Mac | 15.69418 | 13350855 |
| 2R | 23880186 | 23880453 | ../05_Mac | 15.68813 | 23880326 |
| 2R | 20104128 | 20104412 | ../05_Mac | 15.68596 | 20104241 |
| 2L | 5974028  | 5974359  | ../05_Mac | 15.67888 | 5974189  |
| 2L | 20360578 | 20360928 | ../05_Mac | 15.66438 | 20360736 |
| 2R | 9139516  | 9139816  | ../05_Mac | 15.66209 | 9139681  |
| 3L | 6876064  | 6876288  | ../05_Mac | 15.65517 | 6876188  |
| 2R | 4542034  | 4542312  | ../05_Mac | 15.648   | 4542197  |
| 3L | 9998331  | 9998691  | ../05_Mac | 15.648   | 9998487  |
| 3L | 18820238 | 18820623 | ../05_Mac | 15.6304  | 18820404 |
| 2R | 20882133 | 20882483 | ../05_Mac | 15.61656 | 20882287 |
| 2R | 21291832 | 21292078 | ../05_Mac | 15.60834 | 21291952 |
| 3L | 16847612 | 16847886 | ../05_Mac | 15.60834 | 16847757 |
| 3L | 4776362  | 4776704  | ../05_Mac | 15.60649 | 4776515  |
| 3R | 6466341  | 6466668  | ../05_Mac | 15.60555 | 6466492  |
| 3L | 7115738  | 7116161  | ../05_Mac | 15.59646 | 7115923  |
| 3L | 506552   | 507110   | ../05_Mac | 15.58506 | 506663   |
| 3L | 22864631 | 22864918 | ../05_Mac | 15.56884 | 22864776 |
| 3R | 19353148 | 19353608 | ../05_Mac | 15.53683 | 19353252 |
| 2L | 11702710 | 11702990 | ../05_Mac | 15.53404 | 11702826 |
| 2R | 1753728  | 1754056  | ../05_Mac | 15.53404 | 1753868  |
| 2R | 4717963  | 4718219  | ../05_Mac | 15.53404 | 4718136  |
| 2R | 5463461  | 5463723  | ../05_Mac | 15.53404 | 5463563  |
| 2R | 12108212 | 12108594 | ../05_Mac | 15.53404 | 12108352 |
| 2R | 24243778 | 24244109 | ../05_Mac | 15.53404 | 24243922 |
| 3L | 17096472 | 17096757 | ../05_Mac | 15.53404 | 17096656 |
| 3R | 24480488 | 24481239 | ../05_Mac | 15.53404 | 24481091 |
| 3R | 29181302 | 29181629 | ../05_Mac | 15.53404 | 29181442 |
| 3R | 29361285 | 29361646 | ../05_Mac | 15.53404 | 29361472 |
| X  | 10168200 | 10168433 | ../05_Mac | 15.53404 | 10168285 |
| X  | 10480867 | 10481375 | ../05_Mac | 15.53404 | 10481075 |
| X  | 17356496 | 17356743 | ../05_Mac | 15.53404 | 17356590 |
| X  | 20083736 | 20083993 | ../05_Mac | 15.53404 | 20083834 |
| X  | 21486170 | 21486429 | ../05_Mac | 15.53404 | 21486304 |
| 3R | 26090151 | 26090376 | ../05_Mac | 15.52656 | 26090264 |
| 3R | 30124771 | 30125114 | ../05_Mac | 15.51393 | 30124895 |
| 2R | 8554756  | 8555064  | ../05_Mac | 15.51089 | 8554913  |
| X  | 4104779  | 4105396  | ../05_Mac | 15.51089 | 4104963  |
| 3R | 6280895  | 6281246  | ../05_Mac | 15.50157 | 6281084  |
| 3R | 24882192 | 24882446 | ../05_Mac | 15.50157 | 24882321 |
| 2L | 15006119 | 15006429 | ../05_Mac | 15.49828 | 15006289 |
| 3R | 4455524  | 4455844  | ../05_Mac | 15.4879  | 4455684  |
| 3L | 4831818  | 4832129  | ../05_Mac | 15.46462 | 4831999  |
| 3L | 5131066  | 5131398  | ../05_Mac | 15.45738 | 5131233  |
| 3R | 16058023 | 16058388 | ../05_Mac | 15.43352 | 16058148 |
| 3R | 10076005 | 10076574 | ../05_Mac | 15.43166 | 10076340 |
| 3R | 11583830 | 11584086 | ../05_Mac | 15.4253  | 11583965 |
| 2L | 18272479 | 18272885 | ../05_Mac | 15.42443 | 18272637 |
| 3R | 13574695 | 13574986 | ../05_Mac | 15.40649 | 13574828 |

|    |          |          |           |          |          |
|----|----------|----------|-----------|----------|----------|
| 2R | 21899387 | 21899716 | ../05_Mac | 15.40451 | 21899530 |
| 3L | 9827604  | 9827998  | ../05_Mac | 15.40451 | 9827820  |
| 2R | 21125199 | 21125521 | ../05_Mac | 15.39928 | 21125329 |
| 3L | 6800760  | 6801635  | ../05_Mac | 15.3911  | 6801486  |
| 2L | 14027666 | 14028033 | ../05_Mac | 15.38107 | 14027805 |
| 3L | 22563327 | 22563637 | ../05_Mac | 15.37989 | 22563450 |
| 3R | 15000915 | 15001154 | ../05_Mac | 15.37989 | 15001018 |
| 3L | 19079700 | 19080161 | ../05_Mac | 15.3735  | 19079958 |
| 3L | 2262103  | 2262402  | ../05_Mac | 15.35392 | 2262265  |
| 2L | 13116919 | 13117298 | ../05_Mac | 15.34725 | 13117086 |
| 2L | 16712943 | 16713275 | ../05_Mac | 15.34725 | 16713084 |
| 3L | 15687305 | 15687654 | ../05_Mac | 15.34725 | 15687495 |
| 3L | 22735418 | 22736055 | ../05_Mac | 15.34156 | 22735572 |
| 2L | 17793011 | 17793529 | ../05_Mac | 15.32623 | 17793359 |
| 2L | 21865027 | 21865402 | ../05_Mac | 15.32172 | 21865142 |
| 3L | 5380207  | 5380654  | ../05_Mac | 15.30758 | 5380446  |
| 3R | 26571240 | 26571531 | ../05_Mac | 15.30027 | 26571379 |
| 3R | 7102811  | 7103224  | ../05_Mac | 15.29487 | 7103046  |
| 2L | 13942069 | 13942364 | ../05_Mac | 15.2923  | 13942234 |
| 3L | 22282534 | 22282803 | ../05_Mac | 15.2923  | 22282687 |
| 2L | 20105513 | 20105835 | ../05_Mac | 15.29087 | 20105654 |
| 3R | 20077733 | 20077979 | ../05_Mac | 15.27878 | 20077904 |
| 2L | 15502300 | 15502602 | ../05_Mac | 15.2593  | 15502434 |
| 2L | 21916867 | 21917126 | ../05_Mac | 15.2593  | 21917001 |
| 3R | 21636111 | 21636432 | ../05_Mac | 15.25532 | 21636250 |
| 2R | 16347794 | 16348075 | ../05_Mac | 15.25127 | 16347940 |
| 2L | 20141285 | 20141689 | ../05_Mac | 15.22775 | 20141553 |
| 3R | 24342383 | 24342671 | ../05_Mac | 15.20452 | 24342524 |
| 2R | 24605384 | 24605671 | ../05_Mac | 15.20012 | 24605525 |
| 2L | 16921523 | 16921816 | ../05_Mac | 15.19421 | 16921650 |
| 2L | 17861775 | 17862162 | ../05_Mac | 15.19421 | 17861938 |
| 2L | 23405295 | 23405596 | ../05_Mac | 15.19421 | 23405465 |
| 2R | 930965   | 931272   | ../05_Mac | 15.19421 | 931136   |
| 2R | 6586784  | 6587097  | ../05_Mac | 15.19421 | 6586930  |
| 3L | 13622650 | 13623204 | ../05_Mac | 15.19421 | 13623031 |
| 3R | 27306986 | 27307390 | ../05_Mac | 15.19421 | 27307163 |
| X  | 16231621 | 16231870 | ../05_Mac | 15.19421 | 16231750 |
| X  | 17764932 | 17765236 | ../05_Mac | 15.19421 | 17765087 |
| 3R | 12394657 | 12394968 | ../05_Mac | 15.19242 | 12394798 |
| 3L | 5673441  | 5673792  | ../05_Mac | 15.19178 | 5673609  |
| 3L | 11364668 | 11365135 | ../05_Mac | 15.18409 | 11364959 |
| 3R | 25267263 | 25267578 | ../05_Mac | 15.17137 | 25267413 |
| 3R | 14425033 | 14425302 | ../05_Mac | 15.16008 | 14425141 |
| 2L | 6508062  | 6508433  | ../05_Mac | 15.1516  | 6508296  |
| 3L | 11024275 | 11024608 | ../05_Mac | 15.14627 | 11024436 |
| 3L | 27366280 | 27366627 | ../05_Mac | 15.14627 | 27366428 |
| 3R | 4557088  | 4557377  | ../05_Mac | 15.14191 | 4557210  |
| 3R | 10861672 | 10862035 | ../05_Mac | 15.14149 | 10861854 |
| 3L | 15852067 | 15852427 | ../05_Mac | 15.11777 | 15852239 |

|    |          |          |           |          |          |
|----|----------|----------|-----------|----------|----------|
| 2R | 14850421 | 14850651 | ../05_Mac | 15.1137  | 14850515 |
| 2R | 13325518 | 13326216 | ../05_Mac | 15.10127 | 13326101 |
| 3L | 18246029 | 18246301 | ../05_Mac | 15.10127 | 18246164 |
| 3L | 4448127  | 4448419  | ../05_Mac | 15.09054 | 4448305  |
| 3L | 18903498 | 18903890 | ../05_Mac | 15.08912 | 18903743 |
| 3L | 340643   | 340920   | ../05_Mac | 15.08077 | 340754   |
| 2R | 17985876 | 17986168 | ../05_Mac | 15.06981 | 17986025 |
| 2R | 13419780 | 13420035 | ../05_Mac | 15.06644 | 13419911 |
| 2L | 13133987 | 13134293 | ../05_Mac | 15.04955 | 13134148 |
| 3R | 13037032 | 13037351 | ../05_Mac | 15.04732 | 13037192 |
| 3L | 8039485  | 8039795  | ../05_Mac | 15.04086 | 8039618  |
| 3L | 11667311 | 11667612 | ../05_Mac | 15.04086 | 11667484 |
| 2L | 8202984  | 8203249  | ../05_Mac | 15.0408  | 8203121  |
| 2R | 23729285 | 23729518 | ../05_Mac | 15.02199 | 23729392 |
| 3L | 22380976 | 22381332 | ../05_Mac | 15.01612 | 22381160 |
| 2L | 19395368 | 19395936 | ../05_Mac | 15.0139  | 19395560 |
| 2L | 18905405 | 18905732 | ../05_Mac | 15.01044 | 18905585 |
| 2L | 296333   | 296635   | ../05_Mac | 15.00885 | 296492   |
| 2L | 914783   | 915149   | ../05_Mac | 15.00815 | 914959   |
| 2L | 11389664 | 11389985 | ../05_Mac | 15.00815 | 11389810 |
| 3L | 9035045  | 9035529  | ../05_Mac | 15.00124 | 9035329  |
| 2L | 16506667 | 16507158 | ../05_Mac | 14.98276 | 16506964 |
| 3L | 21934627 | 21934897 | ../05_Mac | 14.96848 | 21934764 |
| 3L | 1513858  | 1514471  | ../05_Mac | 14.96263 | 1514010  |
| 3R | 17987053 | 17987366 | ../05_Mac | 14.96167 | 17987203 |
| 2R | 12941681 | 12942174 | ../05_Mac | 14.9616  | 12942015 |
| 3R | 7932482  | 7932769  | ../05_Mac | 14.9616  | 7932628  |
| 3L | 1848255  | 1848569  | ../05_Mac | 14.95245 | 1848408  |
| 2R | 22857129 | 22857401 | ../05_Mac | 14.94608 | 22857254 |
| 3R | 11104960 | 11105366 | ../05_Mac | 14.94557 | 11105198 |
| 3R | 30422109 | 30422361 | ../05_Mac | 14.94315 | 30422232 |
| 2L | 11623270 | 11623557 | ../05_Mac | 14.92423 | 11623436 |
| 2L | 9920860  | 9921225  | ../05_Mac | 14.92342 | 9921046  |
| 3R | 20823091 | 20823360 | ../05_Mac | 14.91562 | 20823197 |
| 3L | 18678505 | 18678892 | ../05_Mac | 14.91115 | 18678732 |
| 3L | 8321218  | 8321499  | ../05_Mac | 14.91026 | 8321334  |
| 2L | 20335471 | 20335832 | ../05_Mac | 14.9058  | 20335680 |
| 3L | 7155047  | 7155352  | ../05_Mac | 14.90379 | 7155204  |
| 2L | 5594490  | 5594749  | ../05_Mac | 14.88883 | 5594598  |
| 2L | 19560182 | 19560676 | ../05_Mac | 14.88112 | 19560491 |
| 2L | 9085465  | 9085812  | ../05_Mac | 14.88103 | 9085627  |
| 2R | 25094715 | 25095031 | ../05_Mac | 14.87911 | 25094862 |
| 2L | 20541800 | 20542066 | ../05_Mac | 14.85764 | 20541951 |
| 2R | 3917654  | 3917899  | ../05_Mac | 14.85764 | 3917763  |
| 2R | 13749762 | 13750009 | ../05_Mac | 14.85764 | 13749896 |
| 2R | 19883534 | 19883886 | ../05_Mac | 14.85764 | 19883688 |
| 2R | 20180002 | 20180303 | ../05_Mac | 14.85764 | 20180161 |
| 2R | 20441489 | 20441789 | ../05_Mac | 14.85764 | 20441658 |
| 3R | 15635211 | 15635630 | ../05_Mac | 14.85764 | 15635511 |

|    |          |          |           |          |          |
|----|----------|----------|-----------|----------|----------|
| X  | 14317784 | 14318046 | ../05_Mac | 14.85764 | 14317913 |
| X  | 21195668 | 21195892 | ../05_Mac | 14.85764 | 21195770 |
| 2L | 4671920  | 4672223  | ../05_Mac | 14.84719 | 4672078  |
| 2R | 13291132 | 13291557 | ../05_Mac | 14.84698 | 13291326 |
| 2L | 19280719 | 19280970 | ../05_Mac | 14.83509 | 19280862 |
| 2L | 13739078 | 13739397 | ../05_Mac | 14.81699 | 13739246 |
| 2L | 1421212  | 1421508  | ../05_Mac | 14.79995 | 1421353  |
| 3L | 14631246 | 14631586 | ../05_Mac | 14.79843 | 14631398 |
| 3R | 4365740  | 4366138  | ../05_Mac | 14.79735 | 4365895  |
| 3L | 1521170  | 1521778  | ../05_Mac | 14.79078 | 1521621  |
| 2L | 127386   | 127633   | ../05_Mac | 14.78766 | 127514   |
| 3R | 11440334 | 11440618 | ../05_Mac | 14.78714 | 11440479 |
| 3R | 25009702 | 25009995 | ../05_Mac | 14.77888 | 25009848 |
| 2R | 11310444 | 11310777 | ../05_Mac | 14.75464 | 11310611 |
| 3L | 19354375 | 19354647 | ../05_Mac | 14.74592 | 19354526 |
| 2L | 11529079 | 11529433 | ../05_Mac | 14.72462 | 11529275 |
| 2R | 7163302  | 7163705  | ../05_Mac | 14.69709 | 7163487  |
| 2R | 22394313 | 22394598 | ../05_Mac | 14.69709 | 22394440 |
| 2L | 2395695  | 2396041  | ../05_Mac | 14.69583 | 2395841  |
| 2L | 5396128  | 5396479  | ../05_Mac | 14.69267 | 5396265  |
| 3R | 22301693 | 22301980 | ../05_Mac | 14.68838 | 22301866 |
| 3R | 30123313 | 30123580 | ../05_Mac | 14.658   | 30123482 |
| 3L | 6986957  | 6987265  | ../05_Mac | 14.65674 | 6987124  |
| 3R | 11615362 | 11615670 | ../05_Mac | 14.65674 | 11615517 |
| 3R | 20441639 | 20441971 | ../05_Mac | 14.6456  | 20441805 |
| 3L | 5596089  | 5596350  | ../05_Mac | 14.64211 | 5596219  |
| 2R | 9419662  | 9420014  | ../05_Mac | 14.62425 | 9419825  |
| 2L | 5485809  | 5486056  | ../05_Mac | 14.61441 | 5485864  |
| 3R | 30075663 | 30075937 | ../05_Mac | 14.61098 | 30075824 |
| 2L | 10185890 | 10186161 | ../05_Mac | 14.59869 | 10186031 |
| 2L | 22005429 | 22005765 | ../05_Mac | 14.59869 | 22005589 |
| 3L | 794667   | 794915   | ../05_Mac | 14.59869 | 794792   |
| 3L | 2827396  | 2827671  | ../05_Mac | 14.59866 | 2827534  |
| 3L | 21887558 | 21887854 | ../05_Mac | 14.5978  | 21887709 |
| 3R | 20881929 | 20882254 | ../05_Mac | 14.59727 | 20882088 |
| 2L | 19916764 | 19917033 | ../05_Mac | 14.59255 | 19916850 |
| 3R | 16107394 | 16107870 | ../05_Mac | 14.59212 | 16107543 |
| 3R | 9446612  | 9446904  | ../05_Mac | 14.57683 | 9446766  |
| 3L | 20667434 | 20667787 | ../05_Mac | 14.57099 | 20667607 |
| 3R | 2446106  | 2446314  | ../05_Mac | 14.56829 | 2446231  |
| 3R | 24435933 | 24436182 | ../05_Mac | 14.56524 | 24436021 |
| 2R | 5644130  | 5644407  | ../05_Mac | 14.5598  | 5644233  |
| X  | 1925634  | 1925866  | ../05_Mac | 14.5567  | 1925737  |
| 2L | 20427134 | 20427438 | ../05_Mac | 14.54342 | 20427278 |
| 3L | 21029408 | 21029739 | ../05_Mac | 14.54342 | 21029550 |
| 3L | 14678097 | 14678359 | ../05_Mac | 14.54223 | 14678205 |
| 3L | 4900001  | 4900233  | ../05_Mac | 14.52776 | 4900132  |
| 3L | 12631438 | 12631779 | ../05_Mac | 14.52776 | 12631605 |
| 2L | 3243051  | 3243336  | ../05_Mac | 14.52372 | 3243129  |

|    |          |          |           |          |          |
|----|----------|----------|-----------|----------|----------|
| 2L | 15221068 | 15221399 | ../05_Mac | 14.52372 | 15221220 |
| 2R | 10384153 | 10384548 | ../05_Mac | 14.52372 | 10384349 |
| 2R | 23120232 | 23120901 | ../05_Mac | 14.52372 | 23120784 |
| 3L | 1059967  | 1060210  | ../05_Mac | 14.52372 | 1060108  |
| 3L | 1389964  | 1390292  | ../05_Mac | 14.52372 | 1390059  |
| 3R | 20490480 | 20490751 | ../05_Mac | 14.52372 | 20490610 |
| 4  | 893411   | 894106   | ../05_Mac | 14.52372 | 893550   |
| X  | 848283   | 848549   | ../05_Mac | 14.52372 | 848390   |
| X  | 9599741  | 9600003  | ../05_Mac | 14.52372 | 9599889  |
| X  | 11244541 | 11244801 | ../05_Mac | 14.52372 | 11244671 |
| X  | 12996521 | 12996806 | ../05_Mac | 14.52372 | 12996670 |
| X  | 14804958 | 14805242 | ../05_Mac | 14.52372 | 14805119 |
| 2L | 9992231  | 9992736  | ../05_Mac | 14.523   | 9992464  |
| 2R | 15415886 | 15416145 | ../05_Mac | 14.50788 | 15416027 |
| 3L | 17653964 | 17654462 | ../05_Mac | 14.50327 | 17654181 |
| 2R | 24050129 | 24050382 | ../05_Mac | 14.49607 | 24050241 |
| 2L | 11168734 | 11169034 | ../05_Mac | 14.48413 | 11168829 |
| 2R | 24259272 | 24259542 | ../05_Mac | 14.47018 | 24259405 |
| 3L | 25285773 | 25286071 | ../05_Mac | 14.46453 | 25285916 |
| 3R | 10693892 | 10694148 | ../05_Mac | 14.45594 | 10694012 |
| 3R | 7324329  | 7324715  | ../05_Mac | 14.45469 | 7324537  |
| 3R | 13454548 | 13454891 | ../05_Mac | 14.44559 | 13454707 |
| 3R | 23526926 | 23527209 | ../05_Mac | 14.44533 | 23527063 |
| 3R | 23972383 | 23972860 | ../05_Mac | 14.40356 | 23972561 |
| 3L | 11811982 | 11812306 | ../05_Mac | 14.4005  | 11812150 |
| 2R | 24766701 | 24767011 | ../05_Mac | 14.38436 | 24766836 |
| 2L | 18263666 | 18263925 | ../05_Mac | 14.37972 | 18263808 |
| 2L | 15847472 | 15847884 | ../05_Mac | 14.34474 | 15847723 |
| 3L | 19252172 | 19252496 | ../05_Mac | 14.33969 | 19252332 |
| 2L | 19141537 | 19141891 | ../05_Mac | 14.3321  | 19141699 |
| 2R | 7424412  | 7424664  | ../05_Mac | 14.3321  | 7424520  |
| 2L | 9293740  | 9294051  | ../05_Mac | 14.3306  | 9293932  |
| X  | 2729310  | 2729585  | ../05_Mac | 14.3306  | 2729453  |
| 3R | 6189221  | 6189590  | ../05_Mac | 14.3166  | 6189408  |
| 2R | 5897373  | 5897679  | ../05_Mac | 14.28619 | 5897498  |
| 3L | 6203208  | 6203471  | ../05_Mac | 14.28481 | 6203328  |
| 3L | 5058314  | 5058652  | ../05_Mac | 14.27647 | 5058395  |
| 3R | 10268244 | 10268605 | ../05_Mac | 14.26422 | 10268400 |
| 2R | 20288702 | 20289093 | ../05_Mac | 14.24725 | 20288871 |
| 2L | 10069380 | 10069646 | ../05_Mac | 14.2421  | 10069533 |
| 2L | 18266425 | 18266729 | ../05_Mac | 14.23745 | 18266608 |
| 2L | 13425729 | 13426126 | ../05_Mac | 14.23566 | 13425981 |
| 3R | 11434795 | 11435223 | ../05_Mac | 14.23247 | 11435081 |
| 2R | 15187636 | 15187850 | ../05_Mac | 14.23068 | 15187752 |
| 3R | 17339752 | 17340395 | ../05_Mac | 14.23068 | 17339895 |
| 2L | 5994690  | 5994965  | ../05_Mac | 14.21375 | 5994840  |
| 3R | 31960346 | 31960967 | ../05_Mac | 14.21375 | 31960546 |
| 3R | 30507629 | 30507910 | ../05_Mac | 14.21171 | 30507740 |
| 2L | 16409803 | 16410008 | ../05_Mac | 14.19287 | 16409878 |

|    |          |          |           |          |          |
|----|----------|----------|-----------|----------|----------|
| 2L | 17855867 | 17856213 | ../05_Mac | 14.19287 | 17856074 |
| 2R | 5274938  | 5275202  | ../05_Mac | 14.19287 | 5275058  |
| 2R | 5961455  | 5961753  | ../05_Mac | 14.19287 | 5961610  |
| 2R | 19638245 | 19638626 | ../05_Mac | 14.19287 | 19638423 |
| 3L | 2009323  | 2009587  | ../05_Mac | 14.19287 | 2009444  |
| 3R | 16738389 | 16738644 | ../05_Mac | 14.19287 | 16738534 |
| 3R | 17913156 | 17913519 | ../05_Mac | 14.19287 | 17913284 |
| X  | 780318   | 780573   | ../05_Mac | 14.19287 | 780451   |
| X  | 5858948  | 5859431  | ../05_Mac | 14.19287 | 5859053  |
| X  | 11263344 | 11263566 | ../05_Mac | 14.19287 | 11263466 |
| X  | 14661762 | 14662019 | ../05_Mac | 14.19287 | 14661889 |
| X  | 16307119 | 16307381 | ../05_Mac | 14.19287 | 16307263 |
| X  | 18427084 | 18427316 | ../05_Mac | 14.19287 | 18427208 |
| 3R | 3586062  | 3586549  | ../05_Mac | 14.18062 | 3586187  |
| 2R | 18289886 | 18290174 | ../05_Mac | 14.16496 | 18290025 |
| 2R | 18472222 | 18472554 | ../05_Mac | 14.13434 | 18472411 |
| 3L | 16959234 | 16959481 | ../05_Mac | 14.1208  | 16959374 |
| 2L | 10615101 | 10615898 | ../05_Mac | 14.11353 | 10615511 |
| 3R | 6614732  | 6615193  | ../05_Mac | 14.10146 | 6614929  |
| 2L | 14891531 | 14891917 | ../05_Mac | 14.09639 | 14891665 |
| 2L | 5712545  | 5712807  | ../05_Mac | 14.09194 | 5712672  |
| 3L | 18858975 | 18859327 | ../05_Mac | 14.09066 | 18859162 |
| 3R | 5128140  | 5128519  | ../05_Mac | 14.08246 | 5128325  |
| 2R | 5684562  | 5684973  | ../05_Mac | 14.06204 | 5684780  |
| 3R | 11292515 | 11292823 | ../05_Mac | 14.05171 | 11292660 |
| 4  | 438399   | 438728   | ../05_Mac | 14.04523 | 438553   |
| 3R | 25517773 | 25518020 | ../05_Mac | 14.02125 | 25517932 |
| 2L | 10854237 | 10854451 | ../05_Mac | 14.00203 | 10854335 |
| 2L | 14708997 | 14709263 | ../05_Mac | 13.97326 | 14709146 |
| 2L | 18381891 | 18382349 | ../05_Mac | 13.97035 | 18382063 |
| 2L | 20340921 | 20341994 | ../05_Mac | 13.97035 | 20341806 |
| 3R | 8766723  | 8767006  | ../05_Mac | 13.96709 | 8766844  |
| 2R | 17003877 | 17004321 | ../05_Mac | 13.96362 | 17004028 |
| 2L | 23128180 | 23128400 | ../05_Mac | 13.96057 | 23128299 |
| 3R | 6061005  | 6061225  | ../05_Mac | 13.96057 | 6061100  |
| 3R | 8218390  | 8218719  | ../05_Mac | 13.96057 | 8218544  |
| 2R | 15011838 | 15012173 | ../05_Mac | 13.95945 | 15011984 |
| 3R | 21530833 | 21531099 | ../05_Mac | 13.95945 | 21530931 |
| 2L | 22277465 | 22277739 | ../05_Mac | 13.94856 | 22277592 |
| 3R | 15532328 | 15532570 | ../05_Mac | 13.94856 | 15532467 |
| 3R | 20588900 | 20589218 | ../05_Mac | 13.9259  | 20589066 |
| 3L | 10176498 | 10176802 | ../05_Mac | 13.92539 | 10176662 |
| 3R | 29200808 | 29201109 | ../05_Mac | 13.91724 | 29200902 |
| 2R | 20458350 | 20458595 | ../05_Mac | 13.9158  | 20458451 |
| 3R | 30873904 | 30874357 | ../05_Mac | 13.91289 | 30874099 |
| 2L | 9105536  | 9105864  | ../05_Mac | 13.90534 | 9105704  |
| 3L | 16471075 | 16471729 | ../05_Mac | 13.89798 | 16471255 |
| 3L | 18818896 | 18819325 | ../05_Mac | 13.89798 | 18819054 |
| 2R | 11643134 | 11643348 | ../05_Mac | 13.88672 | 11643242 |



|    |          |          |           |          |          |
|----|----------|----------|-----------|----------|----------|
| 2R | 24246140 | 24246486 | ../05_Mac | 13.87757 | 24246309 |
| 2R | 15190718 | 15191092 | ../05_Mac | 13.8749  | 15190939 |
| 3R | 25645098 | 25645351 | ../05_Mac | 13.86831 | 25645209 |
| 2R | 8987965  | 8988319  | ../05_Mac | 13.86536 | 8988133  |
| 2L | 886756   | 887055   | ../05_Mac | 13.86463 | 886903   |
| 2L | 911058   | 911383   | ../05_Mac | 13.86463 | 911204   |
| 2L | 19609824 | 19610122 | ../05_Mac | 13.86463 | 19610002 |
| 2R | 13654440 | 13654731 | ../05_Mac | 13.86463 | 13654611 |
| 3L | 22984    | 23251    | ../05_Mac | 13.86463 | 23109    |
| 3L | 4913742  | 4914074  | ../05_Mac | 13.86463 | 4913874  |
| 3L | 11688367 | 11688589 | ../05_Mac | 13.86463 | 11688424 |
| 3L | 13323524 | 13323835 | ../05_Mac | 13.86463 | 13323688 |
| 3R | 17571141 | 17571373 | ../05_Mac | 13.86463 | 17571217 |
| 3R | 27714084 | 27714368 | ../05_Mac | 13.86463 | 27714233 |
| 3R | 28257725 | 28257948 | ../05_Mac | 13.86463 | 28257858 |
| 3R | 28299554 | 28300178 | ../05_Mac | 13.86463 | 28300002 |
| X  | 14383400 | 14383777 | ../05_Mac | 13.86463 | 14383594 |
| X  | 16705930 | 16706151 | ../05_Mac | 13.86463 | 16706051 |
| X  | 18725593 | 18725843 | ../05_Mac | 13.86463 | 18725736 |
| 3R | 4834511  | 4834870  | ../05_Mac | 13.862   | 4834762  |
| 3L | 3929805  | 3930254  | ../05_Mac | 13.85961 | 3929931  |
| 2L | 18474229 | 18474678 | ../05_Mac | 13.85665 | 18474407 |
| 3R | 11769362 | 11769607 | ../05_Mac | 13.85122 | 11769488 |
| 3L | 15791129 | 15791765 | ../05_Mac | 13.85067 | 15791341 |
| 3R | 27643800 | 27644055 | ../05_Mac | 13.83255 | 27643902 |
| 2L | 20590070 | 20590356 | ../05_Mac | 13.82189 | 20590197 |
| 3R | 17583685 | 17583927 | ../05_Mac | 13.82189 | 17583785 |
| 2R | 20642901 | 20643166 | ../05_Mac | 13.80645 | 20642997 |
| 3L | 9826117  | 9826406  | ../05_Mac | 13.80272 | 9826233  |
| 2L | 6843981  | 6844313  | ../05_Mac | 13.79974 | 6844151  |
| 3R | 12399968 | 12400249 | ../05_Mac | 13.77692 | 12400093 |
| 2R | 16309378 | 16309881 | ../05_Mac | 13.75007 | 16309688 |
| 2L | 9913637  | 9913912  | ../05_Mac | 13.7496  | 9913784  |
| 2R | 19652682 | 19652988 | ../05_Mac | 13.74916 | 19652828 |
| 3L | 4433390  | 4433697  | ../05_Mac | 13.74916 | 4433529  |
| 2L | 16550395 | 16550974 | ../05_Mac | 13.74639 | 16550768 |
| 2L | 11124434 | 11124676 | ../05_Mac | 13.74379 | 11124552 |
| 2R | 14129926 | 14130404 | ../05_Mac | 13.74379 | 14130143 |
| 2L | 21931231 | 21931724 | ../05_Mac | 13.73768 | 21931486 |
| 3L | 10158000 | 10158316 | ../05_Mac | 13.73768 | 10158171 |
| 3R | 29610396 | 29610663 | ../05_Mac | 13.73768 | 29610571 |
| 3L | 5398060  | 5398418  | ../05_Mac | 13.72971 | 5398173  |
| 2L | 9564810  | 9565014  | ../05_Mac | 13.72608 | 9564931  |
| 2R | 23925319 | 23925585 | ../05_Mac | 13.71683 | 23925449 |
| 2L | 4596446  | 4596775  | ../05_Mac | 13.71297 | 4596635  |
| 3L | 8239974  | 8240310  | ../05_Mac | 13.7005  | 8240137  |
| 3L | 16881060 | 16881316 | ../05_Mac | 13.67861 | 16881205 |
| 2L | 5496944  | 5497199  | ../05_Mac | 13.67849 | 5497022  |
| 3L | 12139043 | 12139673 | ../05_Mac | 13.66136 | 12139213 |

|    |          |          |           |          |          |
|----|----------|----------|-----------|----------|----------|
| 2L | 13352076 | 13352503 | ../05_Mac | 13.65519 | 13352232 |
| 2L | 19595898 | 19596174 | ../05_Mac | 13.65106 | 19596053 |
| 3L | 13019139 | 13019527 | ../05_Mac | 13.64342 | 13019258 |
| 2L | 6632544  | 6632783  | ../05_Mac | 13.64306 | 6632690  |
| 2R | 8336147  | 8336468  | ../05_Mac | 13.64306 | 8336320  |
| 3R | 28952092 | 28952387 | ../05_Mac | 13.63827 | 28952247 |
| 3R | 11687216 | 11687450 | ../05_Mac | 13.63674 | 11687324 |
| 3R | 8537181  | 8537706  | ../05_Mac | 13.61617 | 8537348  |
| 3L | 18250442 | 18250791 | ../05_Mac | 13.60425 | 18250616 |
| 2R | 2724958  | 2725231  | ../05_Mac | 13.60172 | 2725058  |
| 2R | 8030515  | 8030805  | ../05_Mac | 13.59823 | 8030682  |
| 3L | 27286116 | 27286409 | ../05_Mac | 13.59604 | 27286249 |
| 3R | 8205502  | 8205734  | ../05_Mac | 13.59604 | 8205634  |
| 2L | 482151   | 482499   | ../05_Mac | 13.59591 | 482313   |
| 3R | 11340809 | 11341111 | ../05_Mac | 13.59278 | 11340958 |
| 3R | 32062877 | 32063200 | ../05_Mac | 13.59012 | 32063088 |
| 3L | 3389575  | 3389890  | ../05_Mac | 13.57244 | 3389728  |
| 3L | 18030601 | 18030910 | ../05_Mac | 13.56778 | 18030774 |
| 2R | 19548985 | 19549349 | ../05_Mac | 13.56677 | 19549155 |
| 3R | 8500125  | 8500398  | ../05_Mac | 13.5524  | 8500274  |
| 2R | 21959550 | 21959865 | ../05_Mac | 13.549   | 21959708 |
| 2L | 10890146 | 10890465 | ../05_Mac | 13.54818 | 10890319 |
| 2L | 8446710  | 8447118  | ../05_Mac | 13.5397  | 8446865  |
| 2L | 17664614 | 17664878 | ../05_Mac | 13.5397  | 17664765 |
| 2L | 22926562 | 22927250 | ../05_Mac | 13.5397  | 22927038 |
| 2R | 11162066 | 11162390 | ../05_Mac | 13.5397  | 11162228 |
| 2R | 18205731 | 18206051 | ../05_Mac | 13.5397  | 18205881 |
| 2R | 23484579 | 23484903 | ../05_Mac | 13.5397  | 23484746 |
| 3L | 2913832  | 2914096  | ../05_Mac | 13.5397  | 2913950  |
| 3L | 20136013 | 20136278 | ../05_Mac | 13.5397  | 20136152 |
| 3R | 5018528  | 5018823  | ../05_Mac | 13.5397  | 5018700  |
| 3R | 9160419  | 9160707  | ../05_Mac | 13.5397  | 9160555  |
| X  | 6483267  | 6483788  | ../05_Mac | 13.5397  | 6483441  |
| X  | 6913302  | 6913578  | ../05_Mac | 13.5397  | 6913416  |
| X  | 7049970  | 7050232  | ../05_Mac | 13.5397  | 7050115  |
| X  | 14292062 | 14292261 | ../05_Mac | 13.5397  | 14292158 |
| X  | 14545470 | 14545720 | ../05_Mac | 13.5397  | 14545618 |
| X  | 14683795 | 14684058 | ../05_Mac | 13.5397  | 14683910 |
| X  | 15664498 | 15664740 | ../05_Mac | 13.5397  | 15664656 |
| 3R | 27583201 | 27583472 | ../05_Mac | 13.52921 | 27583341 |
| 2R | 21928500 | 21928777 | ../05_Mac | 13.52756 | 21928627 |
| 2L | 19463041 | 19463298 | ../05_Mac | 13.52226 | 19463128 |
| 2R | 18031623 | 18031893 | ../05_Mac | 13.52226 | 18031748 |
| 3L | 11319654 | 11319867 | ../05_Mac | 13.50688 | 11319742 |
| 3L | 9139914  | 9140311  | ../05_Mac | 13.50571 | 9140127  |
| 2R | 15575416 | 15575665 | ../05_Mac | 13.475   | 15575544 |
| 2L | 19211150 | 19211483 | ../05_Mac | 13.47424 | 19211311 |
| 3R | 8553839  | 8554122  | ../05_Mac | 13.47424 | 8553994  |
| X  | 7735650  | 7735911  | ../05_Mac | 13.47424 | 7735797  |

|    |          |          |           |          |          |
|----|----------|----------|-----------|----------|----------|
| 3L | 18356241 | 18356587 | ../05_Mac | 13.46446 | 18356419 |
| 3R | 14628048 | 14628480 | ../05_Mac | 13.45455 | 14628360 |
| 3R | 18327634 | 18328149 | ../05_Mac | 13.42616 | 18327807 |
| 3L | 17404658 | 17404870 | ../05_Mac | 13.40533 | 17404775 |
| 3R | 26570111 | 26570484 | ../05_Mac | 13.39334 | 26570305 |
| 3L | 6556564  | 6556881  | ../05_Mac | 13.38456 | 6556707  |
| 3L | 17822637 | 17823542 | ../05_Mac | 13.37289 | 17823380 |
| 3L | 15986687 | 15987042 | ../05_Mac | 13.37052 | 15986865 |
| 2L | 8520765  | 8521160  | ../05_Mac | 13.36786 | 8520898  |
| 2L | 11950084 | 11950576 | ../05_Mac | 13.33261 | 11950253 |
| 3R | 13892551 | 13892919 | ../05_Mac | 13.33261 | 13892721 |
| 3R | 16312637 | 16312946 | ../05_Mac | 13.3268  | 16312772 |
| 2R | 19914139 | 19914463 | ../05_Mac | 13.31844 | 19914303 |
| 3L | 4592595  | 4592880  | ../05_Mac | 13.31844 | 4592702  |
| 3R | 16464364 | 16464622 | ../05_Mac | 13.31421 | 16464517 |
| 2R | 20592271 | 20592640 | ../05_Mac | 13.31329 | 20592518 |
| 3R | 26654875 | 26655185 | ../05_Mac | 13.31021 | 26655010 |
| 2L | 5383998  | 5384296  | ../05_Mac | 13.30243 | 5384116  |
| 3R | 17004720 | 17005118 | ../05_Mac | 13.30154 | 17005002 |
| 3L | 18821714 | 18822093 | ../05_Mac | 13.28374 | 18821880 |
| 2R | 12906201 | 12906492 | ../05_Mac | 13.28088 | 12906341 |
| 3L | 21546632 | 21546932 | ../05_Mac | 13.27245 | 21546801 |
| 2L | 10323584 | 10323918 | ../05_Mac | 13.26513 | 10323740 |
| 3L | 17890775 | 17891087 | ../05_Mac | 13.2647  | 17890933 |
| 3R | 12335054 | 12335432 | ../05_Mac | 13.26085 | 12335297 |
| 3L | 18017720 | 18018022 | ../05_Mac | 13.25502 | 18017862 |
| 2R | 18740694 | 18740950 | ../05_Mac | 13.25115 | 18740811 |
| 3R | 26897823 | 26898164 | ../05_Mac | 13.23859 | 26897933 |
| 2R | 13789235 | 13789637 | ../05_Mac | 13.23525 | 13789501 |
| 3L | 17863046 | 17863253 | ../05_Mac | 13.21739 | 17863083 |
| 3R | 3738226  | 3738507  | ../05_Mac | 13.21739 | 3738370  |
| 3R | 22973519 | 22973814 | ../05_Mac | 13.21739 | 22973653 |
| X  | 5169622  | 5169942  | ../05_Mac | 13.21739 | 5169784  |
| X  | 5856296  | 5856506  | ../05_Mac | 13.21739 | 5856422  |
| X  | 7954435  | 7954808  | ../05_Mac | 13.21739 | 7954622  |
| X  | 13066489 | 13066721 | ../05_Mac | 13.21739 | 13066605 |
| X  | 16190449 | 16190663 | ../05_Mac | 13.21739 | 16190542 |
| X  | 20129389 | 20129674 | ../05_Mac | 13.21739 | 20129499 |
| X  | 20347922 | 20348173 | ../05_Mac | 13.21739 | 20348046 |
| X  | 20678177 | 20678434 | ../05_Mac | 13.21739 | 20678273 |
| 2R | 10687888 | 10688173 | ../05_Mac | 13.21348 | 10688015 |
| 3L | 20673865 | 20674280 | ../05_Mac | 13.21348 | 20674102 |
| 3R | 20187473 | 20187831 | ../05_Mac | 13.21348 | 20187636 |
| 3R | 23256725 | 23256985 | ../05_Mac | 13.21335 | 23256849 |
| 3R | 11185773 | 11186096 | ../05_Mac | 13.18305 | 11185921 |
| 2R | 23365754 | 23366093 | ../05_Mac | 13.17767 | 23365911 |
| 2L | 7709344  | 7709710  | ../05_Mac | 13.17017 | 7709522  |
| 3R | 21804019 | 21804256 | ../05_Mac | 13.16612 | 21804141 |
| 2L | 21086924 | 21087302 | ../05_Mac | 13.1607  | 21087156 |

|    |          |          |           |          |          |
|----|----------|----------|-----------|----------|----------|
| 3R | 4446904  | 4447160  | ../05_Mac | 13.13579 | 4447023  |
| 3L | 9043701  | 9044019  | ../05_Mac | 13.13225 | 9043826  |
| 2L | 12413309 | 12414006 | ../05_Mac | 13.1281  | 12413528 |
| 3R | 29561061 | 29561352 | ../05_Mac | 13.1281  | 29561232 |
| 3R | 19390783 | 19391092 | ../05_Mac | 13.10723 | 19390933 |
| 3L | 9975368  | 9975684  | ../05_Mac | 13.10476 | 9975531  |
| 3L | 15862681 | 15863069 | ../05_Mac | 13.10312 | 15862942 |
| 2R | 18536664 | 18536968 | ../05_Mac | 13.10237 | 18536785 |
| 3L | 22348668 | 22349092 | ../05_Mac | 13.10102 | 22348913 |
| 2R | 22448484 | 22449340 | ../05_Mac | 13.0896  | 22448668 |
| 2R | 17089145 | 17089425 | ../05_Mac | 13.08792 | 17089309 |
| 3R | 7165577  | 7166035  | ../05_Mac | 13.07638 | 7165795  |
| 2R | 15213085 | 15213398 | ../05_Mac | 13.06869 | 15213270 |
| 3R | 31622646 | 31622966 | ../05_Mac | 13.05528 | 31622828 |
| 3R | 19127510 | 19127815 | ../05_Mac | 13.05284 | 19127662 |
| 3R | 21414446 | 21414705 | ../05_Mac | 13.05284 | 21414552 |
| 3R | 24657002 | 24657333 | ../05_Mac | 13.05111 | 24657135 |
| 2L | 11733865 | 11734190 | ../05_Mac | 13.04901 | 11733953 |
| 3L | 7367630  | 7368076  | ../05_Mac | 13.03082 | 7367742  |
| 3L | 17041639 | 17041945 | ../05_Mac | 13.02814 | 17041820 |
| 2L | 8474815  | 8475126  | ../05_Mac | 13.02479 | 8474972  |
| 2L | 9862797  | 9863170  | ../05_Mac | 13.02087 | 9862978  |
| 3L | 7708611  | 7708923  | ../05_Mac | 13.02087 | 7708765  |
| 2L | 19512964 | 19513255 | ../05_Mac | 13.00266 | 19513119 |
| 3R | 26788317 | 26788826 | ../05_Mac | 13.00257 | 26788500 |
| 2L | 15466314 | 15466634 | ../05_Mac | 12.99672 | 15466497 |
| 3L | 16441317 | 16441556 | ../05_Mac | 12.99672 | 16441410 |
| 2L | 7244826  | 7245267  | ../05_Mac | 12.9732  | 7245000  |
| 2L | 11916667 | 11917074 | ../05_Mac | 12.97273 | 11916840 |
| 3R | 5608535  | 5609061  | ../05_Mac | 12.95806 | 5608698  |
| 3R | 25972386 | 25972635 | ../05_Mac | 12.95371 | 25972510 |
| 2L | 107920   | 108220   | ../05_Mac | 12.95099 | 108031   |
| 2R | 8021494  | 8021973  | ../05_Mac | 12.94798 | 8021604  |
| 3L | 12137600 | 12137846 | ../05_Mac | 12.94152 | 12137769 |
| 3L | 23382787 | 23383067 | ../05_Mac | 12.92448 | 23382919 |
| 3L | 18574122 | 18574469 | ../05_Mac | 12.92181 | 18574322 |
| 2L | 18421830 | 18422171 | ../05_Mac | 12.9217  | 18422068 |
| 2L | 2835003  | 2835352  | ../05_Mac | 12.90735 | 2835198  |
| 3R | 12725709 | 12726104 | ../05_Mac | 12.90735 | 12725851 |
| 3R | 27943702 | 27944006 | ../05_Mac | 12.90472 | 27943861 |
| 2L | 4233818  | 4234241  | ../05_Mac | 12.8985  | 4233897  |
| 2R | 9339080  | 9339433  | ../05_Mac | 12.8985  | 9339262  |
| 2R | 12097263 | 12097669 | ../05_Mac | 12.8985  | 12097510 |
| 2R | 13054189 | 13054496 | ../05_Mac | 12.8985  | 13054336 |
| 2R | 16441249 | 16441620 | ../05_Mac | 12.8985  | 16441502 |
| 3L | 17097146 | 17097485 | ../05_Mac | 12.8985  | 17097341 |
| 3R | 19780451 | 19780706 | ../05_Mac | 12.8985  | 19780628 |
| X  | 366293   | 366593   | ../05_Mac | 12.8985  | 366427   |
| X  | 1395280  | 1395531  | ../05_Mac | 12.8985  | 1395382  |

|    |          |          |           |          |          |
|----|----------|----------|-----------|----------|----------|
| 2R | 21377928 | 21378207 | ../05_Mac | 12.89501 | 21378035 |
| 3R | 13592371 | 13593099 | ../05_Mac | 12.89501 | 13592558 |
| 2L | 18250028 | 18250300 | ../05_Mac | 12.85911 | 18250174 |
| 2R | 22881637 | 22881928 | ../05_Mac | 12.85499 | 22881754 |
| 2L | 4820284  | 4820566  | ../05_Mac | 12.83337 | 4820446  |
| 2R | 5703944  | 5704451  | ../05_Mac | 12.8271  | 5704282  |
| 3R | 30539800 | 30540518 | ../05_Mac | 12.8213  | 30539958 |
| 3L | 20062102 | 20062608 | ../05_Mac | 12.81947 | 20062392 |
| 2R | 25068076 | 25068276 | ../05_Mac | 12.8083  | 25068153 |
| 3L | 5714177  | 5714738  | ../05_Mac | 12.8048  | 5714560  |
| 3L | 14876511 | 14876851 | ../05_Mac | 12.79082 | 14876682 |
| 3R | 29502702 | 29502934 | ../05_Mac | 12.78339 | 29502815 |
| 3L | 6513473  | 6513883  | ../05_Mac | 12.78336 | 6513736  |
| 2R | 9338363  | 9338890  | ../05_Mac | 12.76294 | 9338486  |
| 2R | 11760280 | 11760635 | ../05_Mac | 12.74923 | 11760408 |
| 3R | 8208398  | 8208680  | ../05_Mac | 12.73581 | 8208512  |
| 3R | 13787961 | 13788242 | ../05_Mac | 12.73204 | 13788148 |
| 2R | 16268170 | 16268486 | ../05_Mac | 12.72975 | 16268351 |
| 2R | 10487962 | 10488399 | ../05_Mac | 12.72735 | 10488242 |
| 3R | 26020760 | 26021236 | ../05_Mac | 12.68468 | 26020884 |
| 2R | 22609451 | 22609797 | ../05_Mac | 12.67524 | 22609620 |
| 2L | 20738801 | 20739055 | ../05_Mac | 12.67349 | 20738900 |
| 3R | 19259502 | 19259791 | ../05_Mac | 12.6671  | 19259666 |
| 3R | 26121986 | 26122349 | ../05_Mac | 12.6671  | 26122165 |
| 2L | 17948061 | 17948493 | ../05_Mac | 12.65627 | 17948349 |
| 2L | 18845877 | 18846199 | ../05_Mac | 12.6553  | 18846032 |
| 3L | 14478830 | 14479107 | ../05_Mac | 12.65476 | 14478974 |
| 2R | 13337616 | 13338195 | ../05_Mac | 12.64343 | 13338071 |
| 3L | 786653   | 786973   | ../05_Mac | 12.64343 | 786795   |
| 2L | 8154346  | 8154767  | ../05_Mac | 12.63619 | 8154560  |
| 3R | 4432509  | 4433004  | ../05_Mac | 12.63619 | 4432709  |
| 2R | 4348367  | 4348775  | ../05_Mac | 12.63499 | 4348609  |
| 2L | 12694957 | 12695277 | ../05_Mac | 12.6299  | 12695100 |
| 2L | 9572756  | 9572979  | ../05_Mac | 12.62257 | 9572866  |
| 2L | 14486217 | 14486744 | ../05_Mac | 12.62257 | 14486460 |
| 2R | 23108308 | 23108674 | ../05_Mac | 12.61654 | 23108486 |
| 2L | 1418283  | 1418511  | ../05_Mac | 12.60569 | 1418400  |
| X  | 2442957  | 2443240  | ../05_Mac | 12.60569 | 2443091  |
| 2L | 5953815  | 5954110  | ../05_Mac | 12.59461 | 5953949  |
| 2L | 19077376 | 19077708 | ../05_Mac | 12.59064 | 19077540 |
| 2L | 11735687 | 11735932 | ../05_Mac | 12.58224 | 11735833 |
| 2R | 19971217 | 19971514 | ../05_Mac | 12.58224 | 19971360 |
| 3L | 1459057  | 1459355  | ../05_Mac | 12.58224 | 1459220  |
| 3R | 7622623  | 7622892  | ../05_Mac | 12.58224 | 7622756  |
| 3R | 29435382 | 29435661 | ../05_Mac | 12.58224 | 29435493 |
| 3R | 31523192 | 31523465 | ../05_Mac | 12.58224 | 31523333 |
| X  | 8347653  | 8347863  | ../05_Mac | 12.58224 | 8347768  |
| X  | 9992528  | 9992739  | ../05_Mac | 12.58224 | 9992636  |
| X  | 11979763 | 11980012 | ../05_Mac | 12.58224 | 11979885 |

|          |          |          |           |          |          |
|----------|----------|----------|-----------|----------|----------|
| 2L       | 16949825 | 16950243 | ../05_Mac | 12.5673  | 16950092 |
| 2L       | 21724366 | 21724634 | ../05_Mac | 12.5673  | 21724484 |
| 2R       | 5242922  | 5243143  | ../05_Mac | 12.5673  | 5242999  |
| 3R       | 25943081 | 25943452 | ../05_Mac | 12.5599  | 25943276 |
| 2L       | 12884340 | 12884663 | ../05_Mac | 12.55795 | 12884484 |
| 3L       | 7651448  | 7651743  | ../05_Mac | 12.5405  | 7651571  |
| 3L       | 18699888 | 18700248 | ../05_Mac | 12.5405  | 18700028 |
| 3L       | 14981880 | 14982312 | ../05_Mac | 12.53392 | 14982172 |
| 3R       | 28945497 | 28945731 | ../05_Mac | 12.52216 | 28945638 |
| 2L       | 3475536  | 3475800  | ../05_Mac | 12.51592 | 3475683  |
| 3L       | 17725947 | 17726290 | ../05_Mac | 12.50774 | 17726051 |
| 3R       | 24948066 | 24948377 | ../05_Mac | 12.50774 | 24948212 |
| 3R       | 29616010 | 29616280 | ../05_Mac | 12.50758 | 29616124 |
| 2R       | 10282526 | 10282807 | ../05_Mac | 12.4821  | 10282643 |
| 2R       | 14238271 | 14238549 | ../05_Mac | 12.46826 | 14238420 |
| 2R       | 6237177  | 6237563  | ../05_Mac | 12.46484 | 6237388  |
| 2L       | 9650158  | 9650466  | ../05_Mac | 12.43486 | 9650344  |
| 2R       | 21577134 | 21577463 | ../05_Mac | 12.43486 | 21577291 |
| 2L       | 15733073 | 15733385 | ../05_Mac | 12.42551 | 15733218 |
| 3L       | 7442260  | 7442640  | ../05_Mac | 12.42041 | 7442452  |
| 3L       | 6723169  | 6723431  | ../05_Mac | 12.40745 | 6723339  |
| 2R       | 23356334 | 23356595 | ../05_Mac | 12.4066  | 23356479 |
| 2R       | 7094021  | 7094292  | ../05_Mac | 12.40329 | 7094129  |
| 3L       | 4687026  | 4687299  | ../05_Mac | 12.39492 | 4687194  |
| 2L       | 1129841  | 1130134  | ../05_Mac | 12.38878 | 1130001  |
| 2L       | 18142391 | 18142657 | ../05_Mac | 12.38207 | 18142524 |
| 3L       | 1748435  | 1748785  | ../05_Mac | 12.38148 | 1748630  |
| 2R       | 13948063 | 13948302 | ../05_Mac | 12.3791  | 13948175 |
| 2R       | 22026207 | 22026510 | ../05_Mac | 12.37741 | 22026358 |
| 3L       | 8036437  | 8036652  | ../05_Mac | 12.37634 | 8036584  |
| 3L       | 1597772  | 1598384  | ../05_Mac | 12.36724 | 1598246  |
| 3L       | 4859896  | 4860229  | ../05_Mac | 12.36271 | 4860077  |
| 2L       | 3383110  | 3383557  | ../05_Mac | 12.35846 | 3383277  |
| 2R       | 136933   | 137208   | ../05_Mac | 12.35657 | 137076   |
| 3L       | 12424656 | 12424905 | ../05_Mac | 12.35408 | 12424779 |
| 3R       | 8520487  | 8520744  | ../05_Mac | 12.31673 | 8520623  |
| 3L       | 8701473  | 8701770  | ../05_Mac | 12.30429 | 8701628  |
| 2R       | 8905765  | 8906060  | ../05_Mac | 12.29525 | 8905872  |
| 3L       | 22630024 | 22630331 | ../05_Mac | 12.28133 | 22630188 |
| 3R       | 21465017 | 21465216 | ../05_Mac | 12.27128 | 21465132 |
| 2L       | 17063716 | 17063941 | ../05_Mac | 12.26913 | 17063816 |
| 2L       | 22370098 | 22370639 | ../05_Mac | 12.26913 | 22370455 |
| 3L       | 13633614 | 13633907 | ../05_Mac | 12.26913 | 13633768 |
| 3L       | 22575576 | 22576183 | ../05_Mac | 12.26913 | 22575966 |
| 3L       | 23028341 | 23028662 | ../05_Mac | 12.26913 | 23028499 |
| 3R       | 4077842  | 4078131  | ../05_Mac | 12.26913 | 4077964  |
| Unmapped | 25890    | 26184    | ../05_Mac | 12.26913 | 26078    |
| X        | 6896878  | 6897125  | ../05_Mac | 12.26913 | 6897033  |
| X        | 8026573  | 8026860  | ../05_Mac | 12.26913 | 8026757  |

|    |          |          |           |          |          |
|----|----------|----------|-----------|----------|----------|
| X  | 9836802  | 9837130  | ../05_Mac | 12.26913 | 9836997  |
| X  | 16453801 | 16454027 | ../05_Mac | 12.26913 | 16453913 |
| X  | 19966550 | 19966807 | ../05_Mac | 12.26913 | 19966648 |
| 3L | 2960580  | 2960858  | ../05_Mac | 12.25896 | 2960717  |
| 2L | 2007431  | 2007707  | ../05_Mac | 12.22682 | 2007564  |
| 3R | 15566190 | 15566430 | ../05_Mac | 12.22654 | 15566285 |
| 2R | 8499303  | 8499575  | ../05_Mac | 12.21271 | 8499414  |
| 3R | 28995572 | 28995950 | ../05_Mac | 12.20924 | 28995693 |
| 2L | 17136400 | 17136820 | ../05_Mac | 12.20896 | 17136599 |
| 2R | 20772668 | 20772969 | ../05_Mac | 12.20896 | 20772790 |
| 3L | 6915721  | 6915984  | ../05_Mac | 12.20896 | 6915852  |
| 2R | 13175702 | 13176030 | ../05_Mac | 12.20679 | 13175824 |
| 2R | 19160011 | 19160400 | ../05_Mac | 12.20055 | 19160246 |
| 3L | 17946523 | 17946970 | ../05_Mac | 12.19536 | 17946800 |
| 2R | 19782071 | 19782396 | ../05_Mac | 12.17426 | 19782244 |
| 2L | 20365491 | 20365823 | ../05_Mac | 12.15745 | 20365679 |
| 3L | 17336049 | 17336471 | ../05_Mac | 12.11107 | 17336303 |
| 3L | 2326071  | 2326360  | ../05_Mac | 12.109   | 2326199  |
| 2L | 282621   | 282989   | ../05_Mac | 12.07892 | 282779   |
| 2L | 3714984  | 3715234  | ../05_Mac | 12.05491 | 3715105  |
| 2R | 14856525 | 14856787 | ../05_Mac | 12.05429 | 14856658 |
| 2L | 20684644 | 20684895 | ../05_Mac | 12.05194 | 20684794 |
| 3R | 8847948  | 8848273  | ../05_Mac | 12.04429 | 8848099  |
| 3R | 12456895 | 12457148 | ../05_Mac | 12.03309 | 12456985 |
| 2R | 23799609 | 23800030 | ../05_Mac | 12.02065 | 23799835 |
| 2L | 1960274  | 1960553  | ../05_Mac | 12.00954 | 1960382  |
| 2L | 3481313  | 3481576  | ../05_Mac | 12.00631 | 3481463  |
| 2L | 18073387 | 18073956 | ../05_Mac | 11.98884 | 18073575 |
| 3R | 18527608 | 18527839 | ../05_Mac | 11.98884 | 18527746 |
| 3R | 20504874 | 20505140 | ../05_Mac | 11.98884 | 20505031 |
| X  | 9837678  | 9837980  | ../05_Mac | 11.98884 | 9837875  |
| 2R | 16927818 | 16928251 | ../05_Mac | 11.98711 | 16927978 |
| 3R | 4430135  | 4430527  | ../05_Mac | 11.97838 | 4430274  |
| X  | 6819771  | 6820027  | ../05_Mac | 11.97234 | 6819903  |
| 3L | 9248254  | 9248565  | ../05_Mac | 11.96934 | 9248376  |
| 3L | 22094502 | 22094853 | ../05_Mac | 11.95988 | 22094666 |
| 2R | 13471234 | 13471526 | ../05_Mac | 11.95946 | 13471356 |
| 3R | 6914827  | 6915093  | ../05_Mac | 11.95946 | 6914924  |
| 3L | 2014904  | 2015135  | ../05_Mac | 11.9593  | 2015023  |
| 3L | 23619718 | 23620013 | ../05_Mac | 11.9593  | 23619844 |
| 3R | 12117980 | 12118486 | ../05_Mac | 11.9593  | 12118302 |
| 3R | 16508075 | 16508343 | ../05_Mac | 11.9593  | 16508254 |
| 3R | 22430920 | 22431240 | ../05_Mac | 11.9593  | 22431059 |
| 3R | 31503976 | 31504441 | ../05_Mac | 11.9593  | 31504115 |
| X  | 772336   | 772574   | ../05_Mac | 11.9593  | 772449   |
| X  | 3065555  | 3065822  | ../05_Mac | 11.9593  | 3065649  |
| X  | 4257484  | 4257726  | ../05_Mac | 11.9593  | 4257599  |
| X  | 9209466  | 9209736  | ../05_Mac | 11.9593  | 9209614  |
| 3L | 17793199 | 17793515 | ../05_Mac | 11.94866 | 17793347 |

|    |          |          |           |          |          |
|----|----------|----------|-----------|----------|----------|
| 2L | 10520429 | 10520684 | ../05_Mac | 11.93828 | 10520570 |
| 3R | 29067287 | 29067595 | ../05_Mac | 11.93761 | 29067437 |
| 3R | 5496570  | 5496855  | ../05_Mac | 11.92964 | 5496735  |
| 3R | 13307535 | 13307765 | ../05_Mac | 11.92964 | 13307637 |
| 2L | 10660734 | 10661031 | ../05_Mac | 11.91439 | 10660871 |
| 3R | 16443819 | 16444145 | ../05_Mac | 11.90808 | 16443956 |
| 3R | 28906572 | 28906814 | ../05_Mac | 11.89575 | 28906684 |
| 3L | 7238745  | 7239034  | ../05_Mac | 11.89237 | 7238878  |
| 2L | 9633410  | 9633826  | ../05_Mac | 11.87604 | 9633628  |
| 3R | 5197661  | 5197957  | ../05_Mac | 11.87604 | 5197801  |
| 3R | 19480167 | 19480427 | ../05_Mac | 11.87604 | 19480263 |
| 2L | 8510965  | 8511234  | ../05_Mac | 11.86114 | 8511083  |
| X  | 15828819 | 15829065 | ../05_Mac | 11.86125 | 15828959 |
| 3L | 12925603 | 12925906 | ../05_Mac | 11.86122 | 12925743 |
| 2L | 16835984 | 16836315 | ../05_Mac | 11.85399 | 16836133 |
| 2R | 12742346 | 12742571 | ../05_Mac | 11.84768 | 12742462 |
| 2L | 11930474 | 11930696 | ../05_Mac | 11.84285 | 11930544 |
| 3L | 9292338  | 9292744  | ../05_Mac | 11.83576 | 9292464  |
| 3L | 2283988  | 2284245  | ../05_Mac | 11.81408 | 2284135  |
| 2L | 3211435  | 3212225  | ../05_Mac | 11.80976 | 3211912  |
| 2R | 7121096  | 7121679  | ../05_Mac | 11.80976 | 7121453  |
| 3R | 12353585 | 12353873 | ../05_Mac | 11.79926 | 12353760 |
| 2R | 20079026 | 20079528 | ../05_Mac | 11.78996 | 20079189 |
| 2R | 10727069 | 10727325 | ../05_Mac | 11.78983 | 10727171 |
| 3L | 6667930  | 6668164  | ../05_Mac | 11.78391 | 6668043  |
| 2R | 10832604 | 10832866 | ../05_Mac | 11.77657 | 10832756 |
| 3R | 23231842 | 23232143 | ../05_Mac | 11.77657 | 23231996 |
| 2L | 9485835  | 9486083  | ../05_Mac | 11.76722 | 9485950  |
| 3L | 21732860 | 21733131 | ../05_Mac | 11.76544 | 21733001 |
| 3L | 4936407  | 4936675  | ../05_Mac | 11.76483 | 4936581  |
| 3L | 1465146  | 1465405  | ../05_Mac | 11.76055 | 1465257  |
| 2R | 21273787 | 21274025 | ../05_Mac | 11.7372  | 21273946 |
| 3R | 6095347  | 6095627  | ../05_Mac | 11.7372  | 6095464  |
| 3R | 15384965 | 15385227 | ../05_Mac | 11.73221 | 15385132 |
| 2L | 1114916  | 1115119  | ../05_Mac | 11.73067 | 1115028  |
| 3L | 10437171 | 10437488 | ../05_Mac | 11.72335 | 10437314 |
| 3R | 22036084 | 22036404 | ../05_Mac | 11.70655 | 22036236 |
| 3R | 9468834  | 9469088  | ../05_Mac | 11.67671 | 9468940  |
| 3R | 31432555 | 31432819 | ../05_Mac | 11.67017 | 31432639 |
| 2L | 16443006 | 16443295 | ../05_Mac | 11.66191 | 16443120 |
| 2R | 22698867 | 22699101 | ../05_Mac | 11.66191 | 22698997 |
| 2R | 21849283 | 21849790 | ../05_Mac | 11.6589  | 21849435 |
| 2L | 6239484  | 6239718  | ../05_Mac | 11.65233 | 6239615  |
| 2L | 15468530 | 15468743 | ../05_Mac | 11.65233 | 15468649 |
| 2L | 21543444 | 21543746 | ../05_Mac | 11.65233 | 21543582 |
| 2R | 6488534  | 6488811  | ../05_Mac | 11.65233 | 6488682  |
| 2R | 8816667  | 8817010  | ../05_Mac | 11.65233 | 8816841  |
| 3L | 17346591 | 17346884 | ../05_Mac | 11.65233 | 17346761 |
| 3L | 25340818 | 25341109 | ../05_Mac | 11.65233 | 25340956 |



|    |          |          |           |          |          |
|----|----------|----------|-----------|----------|----------|
| X  | 2362364  | 2362619  | ../05_Mac | 11.65233 | 2362523  |
| X  | 3970488  | 3970713  | ../05_Mac | 11.65233 | 3970576  |
| X  | 4660294  | 4660536  | ../05_Mac | 11.65233 | 4660422  |
| X  | 7638967  | 7639182  | ../05_Mac | 11.65233 | 7639054  |
| X  | 8697756  | 8697968  | ../05_Mac | 11.65233 | 8697895  |
| X  | 10969883 | 10970141 | ../05_Mac | 11.65233 | 10970010 |
| X  | 11234160 | 11234448 | ../05_Mac | 11.65233 | 11234342 |
| X  | 11284914 | 11285149 | ../05_Mac | 11.65233 | 11285020 |
| X  | 18064562 | 18064979 | ../05_Mac | 11.65233 | 18064868 |
| X  | 18305561 | 18305787 | ../05_Mac | 11.65233 | 18305664 |
| 2L | 20882868 | 20883286 | ../05_Mac | 11.64437 | 20883019 |
| 2L | 6344265  | 6344535  | ../05_Mac | 11.63811 | 6344417  |
| 3L | 3889477  | 3889755  | ../05_Mac | 11.63434 | 3889610  |
| 3L | 5981626  | 5981934  | ../05_Mac | 11.63434 | 5981797  |
| 2R | 15497377 | 15497830 | ../05_Mac | 11.63153 | 15497659 |
| 3L | 1841114  | 1841381  | ../05_Mac | 11.63153 | 1841267  |
| 3L | 2364015  | 2364238  | ../05_Mac | 11.62    | 2364108  |
| 3R | 8822459  | 8822784  | ../05_Mac | 11.61726 | 8822645  |
| 3L | 23383188 | 23383485 | ../05_Mac | 11.61121 | 23383333 |
| 3R | 23603465 | 23603672 | ../05_Mac | 11.60907 | 23603585 |
| 2L | 1639346  | 1639715  | ../05_Mac | 11.6078  | 1639538  |
| 2R | 11188970 | 11189333 | ../05_Mac | 11.60087 | 11189179 |
| 3R | 8004589  | 8004910  | ../05_Mac | 11.58457 | 8004762  |
| 2L | 565600   | 565876   | ../05_Mac | 11.5835  | 565730   |
| 3L | 11334496 | 11334772 | ../05_Mac | 11.56995 | 11334618 |
| 2R | 7433354  | 7433702  | ../05_Mac | 11.56661 | 7433502  |
| 3L | 3672645  | 3672980  | ../05_Mac | 11.5661  | 3672887  |
| 3L | 21117812 | 21118156 | ../05_Mac | 11.54603 | 21117946 |
| 2R | 15715943 | 15716192 | ../05_Mac | 11.52844 | 15716069 |
| 2R | 24058799 | 24059054 | ../05_Mac | 11.52444 | 24058945 |
| 3R | 15453481 | 15453747 | ../05_Mac | 11.51356 | 15453607 |
| 3R | 26611259 | 26611646 | ../05_Mac | 11.51287 | 26611435 |
| 2L | 10274924 | 10275371 | ../05_Mac | 11.51053 | 10275154 |
| 2L | 3115213  | 3115591  | ../05_Mac | 11.50611 | 3115379  |
| 3R | 26360023 | 26360435 | ../05_Mac | 11.50415 | 26360295 |
| 3L | 640893   | 641310   | ../05_Mac | 11.50086 | 641071   |
| 2L | 1657010  | 1657339  | ../05_Mac | 11.50004 | 1657195  |
| 2R | 21111093 | 21111411 | ../05_Mac | 11.47683 | 21111251 |
| 3R | 22537701 | 22538005 | ../05_Mac | 11.46122 | 22537838 |
| 3R | 7487587  | 7488275  | ../05_Mac | 11.45658 | 7488143  |
| 3L | 5896787  | 5897377  | ../05_Mac | 11.45193 | 5897018  |
| 2R | 23881081 | 23881384 | ../05_Mac | 11.45074 | 23881212 |
| 2L | 11558453 | 11558764 | ../05_Mac | 11.45072 | 11558660 |
| 3R | 14484715 | 14484984 | ../05_Mac | 11.45072 | 14484839 |
| 2R | 23205527 | 23205840 | ../05_Mac | 11.44684 | 23205676 |
| 3R | 12215352 | 12215588 | ../05_Mac | 11.4254  | 12215487 |
| 2R | 19272408 | 19272672 | ../05_Mac | 11.42376 | 19272563 |
| 2R | 23766140 | 23766428 | ../05_Mac | 11.42376 | 23766294 |
| 3R | 25095275 | 25095646 | ../05_Mac | 11.41984 | 25095419 |

|    |          |          |           |          |          |
|----|----------|----------|-----------|----------|----------|
| 2R | 10904482 | 10904776 | ../05_Mac | 11.41387 | 10904622 |
| X  | 10798110 | 10798336 | ../05_Mac | 11.41387 | 10798212 |
| 2L | 5449014  | 5449311  | ../05_Mac | 11.40752 | 5449168  |
| 3R | 15284042 | 15284312 | ../05_Mac | 11.3929  | 15284168 |
| 2L | 1098157  | 1098524  | ../05_Mac | 11.39265 | 1098335  |
| 2L | 16576527 | 16576736 | ../05_Mac | 11.39265 | 16576587 |
| 2R | 9379313  | 9379712  | ../05_Mac | 11.37404 | 9379515  |
| 3L | 10207041 | 10207336 | ../05_Mac | 11.37404 | 10207178 |
| 3R | 19987688 | 19988090 | ../05_Mac | 11.37404 | 19987909 |
| 2L | 9266020  | 9266251  | ../05_Mac | 11.37113 | 9266080  |
| 2R | 24324341 | 24324827 | ../05_Mac | 11.37113 | 24324587 |
| 2L | 19578518 | 19578783 | ../05_Mac | 11.36989 | 19578643 |
| 3L | 12931452 | 12931767 | ../05_Mac | 11.3482  | 12931605 |
| 3R | 29396168 | 29396495 | ../05_Mac | 11.3482  | 29396274 |
| X  | 1003043  | 1003291  | ../05_Mac | 11.3482  | 1003163  |
| X  | 15925969 | 15926278 | ../05_Mac | 11.3482  | 15926048 |
| X  | 17127242 | 17127452 | ../05_Mac | 11.3482  | 17127359 |
| X  | 18901225 | 18901451 | ../05_Mac | 11.3482  | 18901343 |
| 2R | 14163945 | 14164242 | ../05_Mac | 11.32933 | 14164088 |
| 2R | 11287361 | 11287594 | ../05_Mac | 11.31786 | 11287497 |
| 3R | 7535844  | 7536110  | ../05_Mac | 11.29481 | 7535988  |
| 3R | 28655377 | 28655654 | ../05_Mac | 11.29336 | 28655555 |
| 3R | 23649646 | 23649951 | ../05_Mac | 11.28794 | 23649805 |
| 2L | 11731100 | 11731509 | ../05_Mac | 11.27429 | 11731323 |
| 2R | 22460658 | 22460991 | ../05_Mac | 11.25123 | 22460790 |
| 3L | 17304973 | 17305406 | ../05_Mac | 11.24142 | 17305197 |
| 3L | 2367462  | 2367754  | ../05_Mac | 11.23991 | 2367554  |
| 2L | 19979232 | 19979958 | ../05_Mac | 11.23789 | 19979828 |
| 3R | 25383706 | 25383981 | ../05_Mac | 11.23374 | 25383867 |
| 3R | 7250310  | 7250794  | ../05_Mac | 11.20715 | 7250442  |
| 3L | 6838116  | 6838527  | ../05_Mac | 11.19829 | 6838347  |
| 2L | 10862391 | 10862787 | ../05_Mac | 11.1837  | 10862627 |
| 3R | 30558648 | 30558892 | ../05_Mac | 11.1805  | 30558785 |
| 3R | 27286092 | 27286392 | ../05_Mac | 11.16588 | 27286260 |
| 2R | 13312870 | 13313219 | ../05_Mac | 11.16414 | 13312999 |
| 3L | 11143196 | 11143553 | ../05_Mac | 11.16414 | 11143322 |
| 3L | 15822127 | 15822472 | ../05_Mac | 11.15309 | 15822231 |
| 3R | 10650756 | 10651107 | ../05_Mac | 11.13317 | 10650913 |
| 3L | 9020594  | 9020820  | ../05_Mac | 11.13089 | 9020714  |
| 2R | 23078503 | 23078742 | ../05_Mac | 11.13048 | 23078626 |
| 3L | 1022679  | 1023049  | ../05_Mac | 11.11784 | 1022738  |
| 3L | 4300612  | 4300851  | ../05_Mac | 11.1117  | 4300689  |
| 3R | 8303074  | 8303522  | ../05_Mac | 11.10755 | 8303411  |
| 2R | 15295525 | 15295774 | ../05_Mac | 11.08325 | 15295652 |
| 3L | 551250   | 551936   | ../05_Mac | 11.08325 | 551741   |
| 3L | 21580343 | 21580603 | ../05_Mac | 11.06441 | 21580484 |
| 2R | 3480207  | 3480450  | ../05_Mac | 11.06419 | 3480315  |
| X  | 1783324  | 1783611  | ../05_Mac | 11.06419 | 1783478  |
| 2R | 12251028 | 12251679 | ../05_Mac | 11.05937 | 12251516 |

|    |          |          |           |          |          |
|----|----------|----------|-----------|----------|----------|
| 2L | 10047214 | 10047564 | ../05_Mac | 11.04762 | 10047401 |
| 2R | 11568925 | 11569257 | ../05_Mac | 11.04762 | 11569078 |
| 2R | 15836933 | 15837198 | ../05_Mac | 11.04762 | 15837115 |
| 2R | 23296227 | 23296466 | ../05_Mac | 11.04762 | 23296339 |
| 3R | 774947   | 775186   | ../05_Mac | 11.04762 | 775068   |
| 3R | 13226403 | 13226612 | ../05_Mac | 11.04762 | 13226525 |
| 3R | 23510823 | 23511150 | ../05_Mac | 11.04762 | 23510997 |
| 3R | 27872877 | 27873157 | ../05_Mac | 11.04762 | 27873031 |
| X  | 12862272 | 12862547 | ../05_Mac | 11.04762 | 12862424 |
| X  | 14513966 | 14514165 | ../05_Mac | 11.04762 | 14514067 |
| 2L | 4827435  | 4827727  | ../05_Mac | 11.04348 | 4827563  |
| 2R | 17011655 | 17012077 | ../05_Mac | 11.02375 | 17011983 |
| 3R | 26534248 | 26534574 | ../05_Mac | 11.02375 | 26534402 |
| 2L | 9667970  | 9668269  | ../05_Mac | 11.00987 | 9668126  |
| 3R | 5294222  | 5294506  | ../05_Mac | 10.99123 | 5294325  |
| 3R | 7557316  | 7557811  | ../05_Mac | 10.9854  | 7557551  |
| 3R | 14351774 | 14352189 | ../05_Mac | 10.96986 | 14351929 |
| 3R | 16185039 | 16185413 | ../05_Mac | 10.96986 | 16185204 |
| 2L | 3093823  | 3094111  | ../05_Mac | 10.96911 | 3093944  |
| 3R | 21525557 | 21525825 | ../05_Mac | 10.96911 | 21525683 |
| 2L | 19569818 | 19570295 | ../05_Mac | 10.9649  | 19570217 |
| 2L | 606898   | 607147   | ../05_Mac | 10.93762 | 607031   |
| 2R | 17174189 | 17175001 | ../05_Mac | 10.93677 | 17174298 |
| 3L | 8865442  | 8865745  | ../05_Mac | 10.93503 | 8865612  |
| 3R | 11195976 | 11196271 | ../05_Mac | 10.93485 | 11196107 |
| 2R | 12543893 | 12544245 | ../05_Mac | 10.92294 | 12544033 |
| 3R | 18105865 | 18106569 | ../05_Mac | 10.91535 | 18106431 |
| 3R | 19559404 | 19559641 | ../05_Mac | 10.91535 | 19559563 |
| 2L | 13063254 | 13063557 | ../05_Mac | 10.91312 | 13063400 |
| 3R | 20596355 | 20596618 | ../05_Mac | 10.90583 | 20596456 |
| 3L | 13026796 | 13027065 | ../05_Mac | 10.88865 | 13026965 |
| 3L | 2041854  | 2042140  | ../05_Mac | 10.88401 | 2041957  |
| 3L | 17923742 | 17924040 | ../05_Mac | 10.88157 | 17923940 |
| 3R | 30465626 | 30466400 | ../05_Mac | 10.88157 | 30465774 |
| 3L | 8206322  | 8206604  | ../05_Mac | 10.8697  | 8206421  |
| 2R | 18531999 | 18532305 | ../05_Mac | 10.86872 | 18532139 |
| 2R | 23629133 | 23629426 | ../05_Mac | 10.86872 | 23629307 |
| 3L | 8587232  | 8587448  | ../05_Mac | 10.86591 | 8587365  |
| 2L | 4326134  | 4326365  | ../05_Mac | 10.83124 | 4326223  |
| 2R | 14485182 | 14485420 | ../05_Mac | 10.83124 | 14485288 |
| 2R | 24991719 | 24991978 | ../05_Mac | 10.82661 | 24991873 |
| 2R | 16554135 | 16554409 | ../05_Mac | 10.82199 | 16554247 |
| 2R | 25052014 | 25052286 | ../05_Mac | 10.80803 | 25052156 |
| 2L | 9680934  | 9681438  | ../05_Mac | 10.78595 | 9681165  |
| 2R | 19865937 | 19866164 | ../05_Mac | 10.77901 | 19866035 |
| 3L | 15279053 | 15279516 | ../05_Mac | 10.771   | 15279351 |
| 3R | 14390681 | 14390967 | ../05_Mac | 10.771   | 14390793 |
| 3L | 2787154  | 2787432  | ../05_Mac | 10.76295 | 2787266  |
| 3L | 6125040  | 6125531  | ../05_Mac | 10.75457 | 6125418  |

|    |          |          |           |          |          |
|----|----------|----------|-----------|----------|----------|
| 3R | 19740726 | 19741023 | ../05_Mac | 10.75457 | 19740824 |
| 2L | 19462376 | 19462827 | ../05_Mac | 10.75338 | 19462564 |
| 2R | 3181552  | 3181767  | ../05_Mac | 10.75024 | 3181657  |
| 2R | 6464805  | 6465170  | ../05_Mac | 10.75024 | 6465038  |
| 2R | 24449287 | 24449721 | ../05_Mac | 10.75024 | 24449473 |
| 3L | 9280205  | 9280476  | ../05_Mac | 10.75024 | 9280331  |
| 3R | 20367239 | 20367461 | ../05_Mac | 10.75024 | 20367373 |
| X  | 10655535 | 10655826 | ../05_Mac | 10.75024 | 10655676 |
| X  | 20014839 | 20015090 | ../05_Mac | 10.75024 | 20014960 |
| 2L | 10971528 | 10971838 | ../05_Mac | 10.7267  | 10971670 |
| X  | 15457002 | 15457247 | ../05_Mac | 10.71965 | 15457119 |
| 3R | 21647323 | 21647663 | ../05_Mac | 10.71932 | 21647424 |
| 3R | 31324400 | 31325198 | ../05_Mac | 10.70842 | 31324530 |
| 2L | 10059238 | 10059558 | ../05_Mac | 10.70202 | 10059425 |
| 3L | 17928299 | 17928548 | ../05_Mac | 10.70038 | 17928412 |
| 2L | 1245419  | 1245830  | ../05_Mac | 10.69948 | 1245704  |
| 3L | 2354347  | 2354605  | ../05_Mac | 10.69948 | 2354484  |
| 3R | 18161791 | 18162068 | ../05_Mac | 10.69806 | 18161921 |
| 3L | 21733828 | 21734064 | ../05_Mac | 10.69011 | 21733984 |
| 3R | 24136941 | 24137396 | ../05_Mac | 10.68983 | 24137195 |
| 3L | 16135396 | 16135660 | ../05_Mac | 10.67942 | 16135487 |
| 2R | 10676325 | 10676552 | ../05_Mac | 10.67908 | 10676404 |
| 3L | 5979957  | 5980354  | ../05_Mac | 10.67625 | 5980179  |
| 3L | 9044440  | 9044781  | ../05_Mac | 10.64661 | 9044528  |
| 2L | 16173022 | 16173228 | ../05_Mac | 10.61506 | 16173135 |
| 2R | 15563862 | 15564142 | ../05_Mac | 10.61013 | 15564034 |
| 2R | 11824606 | 11824809 | ../05_Mac | 10.60321 | 11824699 |
| 3R | 23389197 | 23389504 | ../05_Mac | 10.59674 | 23389347 |
| 2L | 14905085 | 14905335 | ../05_Mac | 10.5953  | 14905186 |
| 3L | 17374691 | 17375022 | ../05_Mac | 10.59274 | 17374831 |
| 3R | 7296639  | 7296866  | ../05_Mac | 10.59274 | 7296767  |
| 2L | 4962574  | 4962818  | ../05_Mac | 10.54582 | 4962678  |
| 2R | 13778847 | 13779470 | ../05_Mac | 10.54328 | 13778977 |
| 3R | 26592022 | 26592242 | ../05_Mac | 10.53442 | 26592152 |
| 3R | 30015169 | 30015476 | ../05_Mac | 10.51548 | 30015262 |
| 2R | 22889565 | 22889777 | ../05_Mac | 10.50774 | 22889672 |
| 2L | 21059761 | 21060112 | ../05_Mac | 10.50018 | 21059891 |
| 2L | 7725826  | 7726129  | ../05_Mac | 10.49001 | 7725952  |
| 3R | 8555737  | 8556727  | ../05_Mac | 10.49001 | 8555924  |
| 3R | 24125493 | 24125727 | ../05_Mac | 10.48577 | 24125606 |
| 3R | 13713857 | 13714271 | ../05_Mac | 10.46902 | 13714116 |
| 2R | 12492958 | 12493275 | ../05_Mac | 10.46605 | 12493128 |
| 2L | 10117628 | 10117962 | ../05_Mac | 10.45573 | 10117785 |
| 2L | 17104399 | 17104622 | ../05_Mac | 10.45573 | 17104549 |
| 3L | 23351321 | 23351578 | ../05_Mac | 10.45573 | 23351429 |
| X  | 11291154 | 11291388 | ../05_Mac | 10.45573 | 11291290 |
| X  | 15098176 | 15098380 | ../05_Mac | 10.45573 | 15098268 |
| X  | 21512323 | 21512545 | ../05_Mac | 10.45573 | 21512445 |
| 2R | 20219546 | 20219808 | ../05_Mac | 10.43426 | 20219665 |

|    |          |          |           |          |          |
|----|----------|----------|-----------|----------|----------|
| 2R | 24095952 | 24096249 | ../05_Mac | 10.42691 | 24096115 |
| 2L | 21934616 | 21934889 | ../05_Mac | 10.42597 | 21934706 |
| 3R | 24274026 | 24274278 | ../05_Mac | 10.41777 | 24274162 |
| 2L | 2888748  | 2889088  | ../05_Mac | 10.40047 | 2888912  |
| 2R | 24699711 | 24699934 | ../05_Mac | 10.39501 | 24699821 |
| 3R | 5170814  | 5171314  | ../05_Mac | 10.39323 | 5171005  |
| 3L | 22078405 | 22078640 | ../05_Mac | 10.39037 | 22078527 |
| 3R | 14781881 | 14782166 | ../05_Mac | 10.37213 | 14782027 |
| 3R | 24118472 | 24118810 | ../05_Mac | 10.35434 | 24118592 |
| 3R | 30210614 | 30210910 | ../05_Mac | 10.35434 | 30210798 |
| 2R | 18333322 | 18333797 | ../05_Mac | 10.34057 | 18333743 |
| 3L | 17243737 | 17244085 | ../05_Mac | 10.34057 | 17243910 |
| 2L | 390531   | 390753   | ../05_Mac | 10.33883 | 390627   |
| 2R | 17995521 | 17995913 | ../05_Mac | 10.33128 | 17995749 |
| 3R | 5090314  | 5090536  | ../05_Mac | 10.33128 | 5090426  |
| 3L | 20253016 | 20253276 | ../05_Mac | 10.32679 | 20253123 |
| 3R | 13140794 | 13141070 | ../05_Mac | 10.32679 | 13140910 |
| 3L | 25605683 | 25606044 | ../05_Mac | 10.32655 | 25605838 |
| 2R | 9967293  | 9967576  | ../05_Mac | 10.30643 | 9967450  |
| 2R | 15280831 | 15281165 | ../05_Mac | 10.28831 | 15281021 |
| 2L | 8970973  | 8971240  | ../05_Mac | 10.26259 | 8971085  |
| 3L | 6466510  | 6466806  | ../05_Mac | 10.25926 | 6466642  |
| 3R | 11371621 | 11371992 | ../05_Mac | 10.25926 | 11371774 |
| 2L | 10217660 | 10218165 | ../05_Mac | 10.25555 | 10218073 |
| 3R | 25317419 | 25317716 | ../05_Mac | 10.25555 | 25317529 |
| 3R | 16088415 | 16088661 | ../05_Mac | 10.24422 | 16088550 |
| 2L | 15528377 | 15528632 | ../05_Mac | 10.239   | 15528533 |
| 3L | 6334510  | 6334867  | ../05_Mac | 10.23175 | 6334759  |
| 3L | 18868678 | 18868892 | ../05_Mac | 10.22863 | 18868736 |
| 2R | 13318682 | 13319303 | ../05_Mac | 10.22602 | 13319111 |
| 3L | 4588800  | 4589069  | ../05_Mac | 10.22602 | 4588891  |
| 2L | 3002248  | 3002555  | ../05_Mac | 10.22277 | 3002374  |
| 3R | 13162789 | 13163411 | ../05_Mac | 10.21941 | 13163218 |
| 2L | 5914422  | 5914650  | ../05_Mac | 10.20779 | 5914528  |
| 2L | 18737450 | 18737759 | ../05_Mac | 10.20779 | 18737583 |
| 3R | 4959898  | 4960116  | ../05_Mac | 10.20779 | 4960005  |
| 3L | 954306   | 954597   | ../05_Mac | 10.20706 | 954454   |
| 2L | 11059089 | 11059418 | ../05_Mac | 10.19564 | 11059267 |
| 2L | 20080240 | 20080606 | ../05_Mac | 10.1905  | 20080429 |
| 3R | 18699008 | 18699404 | ../05_Mac | 10.1905  | 18699170 |
| 3L | 13086927 | 13087166 | ../05_Mac | 10.18625 | 13086989 |
| 3R | 18804816 | 18805108 | ../05_Mac | 10.18625 | 18804944 |
| 3R | 22752511 | 22753151 | ../05_Mac | 10.17379 | 22752736 |
| 2L | 2663368  | 2663623  | ../05_Mac | 10.16472 | 2663544  |
| 2L | 2706102  | 2706423  | ../05_Mac | 10.16472 | 2706271  |
| 2R | 18477964 | 18478245 | ../05_Mac | 10.16472 | 18478075 |
| X  | 8105945  | 8106323  | ../05_Mac | 10.16472 | 8106074  |
| 2L | 3015724  | 3015957  | ../05_Mac | 10.16352 | 3015857  |
| 2R | 11636220 | 11636555 | ../05_Mac | 10.14814 | 11636386 |

|    |          |          |           |          |          |
|----|----------|----------|-----------|----------|----------|
| 3L | 19108432 | 19108676 | ../05_Mac | 10.13985 | 19108524 |
| 3R | 21622863 | 21623339 | ../05_Mac | 10.12851 | 21623219 |
| 2L | 17059726 | 17059999 | ../05_Mac | 10.11488 | 17059856 |
| 3R | 30223226 | 30223517 | ../05_Mac | 10.11488 | 30223379 |
| 3L | 5067259  | 5067637  | ../05_Mac | 10.11338 | 5067478  |
| 2R | 7506413  | 7506656  | ../05_Mac | 10.10616 | 7506506  |
| 2L | 14146705 | 14146948 | ../05_Mac | 10.10536 | 14146818 |
| 2R | 8546940  | 8547490  | ../05_Mac | 10.10536 | 8547322  |

Additional Data table S8 (separate excel file) List of 148 'late-activated' genes represented in fig. S13C  
 (Questions: Jongmin Kim / devtxn@gmail.com)

| Probe set ID | gene symbol                  | noHS        | 24hr        | 48hr        | WT          | aly-/-      | kmg KD      | kmg KD; aly-/- |
|--------------|------------------------------|-------------|-------------|-------------|-------------|-------------|-------------|----------------|
| 1632185_s_at | scpr-A /// scpr-B /// scpr-C | 6.449371255 | 5.604569847 | 3.117695528 | 15.03142075 | 11.21957641 | 9.176108928 | 9.696200499    |
| 1638545_at   | CG30409                      | 5.706006812 | 4.743778399 | 3.948167481 | 6.852783991 | 10.43930328 | 4.90971316  | 6.466086395    |
| 1635741_a_at | Patsas                       | 4.026320617 | 3.374956773 | 2.611646534 | 2.52636007  | 8.565277886 | 6.79935026  | 3.83452164     |
| 1625954_at   | CG2681                       | 4.789062189 | 3.896069495 | 3.811872376 | 3.177907934 | 8.998773285 | 6.82829298  | 6.970476835    |
| 1638046_at   | Adgf-B                       | 3.781581889 | 3.538114741 | 2.80475476  | 11.34473885 | 8.702759052 | 9.133478935 | 10.34469877    |
| 1632782_a_at | CG7675                       | 4.524890116 | 4.668072226 | 3.607696746 | 7.330181164 | 9.491261323 | 6.763929843 | 8.10037169     |
| 1636963_at   | CG12111 /// DsimGD24567      | 5.429000391 | 5.527594272 | 4.512522738 | 12.55955381 | 10.0702689  | 5.958089053 | 8.519664455    |
| 1636316_a_at | CG42593                      | 6.071418193 | 7.066005595 | 5.238586396 | 8.501145069 | 10.22890343 | 6.040365257 | 7.758737567    |
| 1633439_at   | Galpha73B                    | 4.074458617 | 4.024562557 | 3.247611414 | 3.98664493  | 9.513519719 | 5.566706938 | 7.674468759    |
| 1629204_a_at | CG7705                       | 5.28115249  | 5.38566323  | 4.477406641 | 4.620641037 | 9.343422032 | 2.57604515  | 6.477610369    |
| 1623712_at   | CG10132                      | 3.821591328 | 4.038016136 | 3.018228523 | 2.861756714 | 10.20995484 | 3.951059674 | 7.317269904    |
| 1623772_a_at | mthl10                       | 3.025479891 | 3.024010664 | 2.265448881 | 5.757232831 | 7.682406596 | 2.205533042 | 5.434635136    |
| 1631280_at   | CG9095                       | 3.628918789 | 3.282435481 | 2.898375413 | 2.642587248 | 7.77176848  | 2.749894092 | 7.461335074    |
| 1630626_at   | pps                          | 4.882378936 | 5.317817443 | 4.179703727 | 6.918472722 | 9.259890414 | 4.711449791 | 5.568004962    |
| 1626500_a_at | CTCF                         | 3.412944345 | 3.174979146 | 2.736559966 | 3.934322002 | 8.319283392 | 2.233085705 | 4.866004977    |
| 1630807_at   | CG33111                      | 7.367320112 | 7.280264525 | 6.744656885 | 6.493575584 | 11.87193528 | 9.123962906 | 10.88312853    |
| 1635334_a_at | CG10732                      | 5.429358186 | 4.766065927 | 4.807792146 | 10.04064624 | 10.06906346 | 7.160938344 | 7.071835826    |
| 1637488_at   | Cad88C                       | 3.283957351 | 3.587423155 | 2.666110041 | 2.630652578 | 7.942355094 | 3.0129169   | 8.586535474    |
| 1637030_at   | CG5948                       | 3.815132553 | 3.798839959 | 3.245530315 | 5.252616014 | 8.699471505 | 2.498942138 | 4.617477229    |
| 1623438_at   | CG9505                       | 3.765353222 | 3.726733378 | 3.202595455 | 2.953406739 | 8.95769434  | 3.583724992 | 3.426618475    |
| 1632739_at   | CG32536 /// CG32537          | 5.857239883 | 5.560855601 | 5.321408004 | 7.726922597 | 10.90156689 | 6.080278409 | 8.675906752    |
| 1623134_at   | CG12506                      | 2.788208288 | 2.872374955 | 2.294036295 | 12.48697877 | 8.481450512 | 6.993745785 | 3.806036464    |
| 1635648_at   | CG14490                      | 3.073249825 | 2.847041822 | 2.648060098 | 2.630226208 | 8.747046704 | 4.797860967 | 4.701704243    |
| 1623007_a_at | ---                          | 3.197184945 | 2.750097387 | 2.790401681 | 7.225035813 | 7.828503269 | 6.51995303  | 5.610034035    |
| 1635585_at   | tadr                         | 2.967220351 | 3.084156981 | 2.573133143 | 6.060658111 | 7.437943488 | 9.411043351 | 5.088662458    |
| 1638689_s_at | ---                          | 3.108615828 | 3.271687459 | 2.718014462 | 3.502526581 | 7.776864353 | 2.348740191 | 3.845164417    |
| 1628741_s_at | TM9SF4                       | 2.621770246 | 2.620434624 | 2.236859997 | 10.47099678 | 10.21935944 | 7.631106238 | 7.707121304    |
| 1630149_at   | CG6290                       | 2.898479702 | 2.945897173 | 2.538485225 | 2.785618809 | 7.103135307 | 3.45481334  | 5.182760471    |
| 1635507_at   | CG30031 /// CG4269           | 6.102293107 | 5.617002642 | 5.743702092 | 5.672655367 | 10.41194519 | 7.556749672 | 8.650210259    |
| 1625911_at   | CG15760                      | 3.164057399 | 2.738530167 | 2.835387227 | 2.751275364 | 8.852088306 | 6.580683219 | 6.877279031    |
| 1640326_at   | CG30381                      | 4.146953706 | 4.593055887 | 3.892860013 | 2.616484829 | 8.89643556  | 2.160086902 | 6.28064077     |
| 1629688_at   | Oseg4                        | 4.203608509 | 4.036500846 | 3.97353744  | 4.071150053 | 8.315096831 | 3.995414625 | 3.848971429    |

|              |         |             |             |             |             |             |             |             |
|--------------|---------|-------------|-------------|-------------|-------------|-------------|-------------|-------------|
| 1627037_s_at | spri    | 2.637740244 | 2.732391352 | 2.411041738 | 6.385026095 | 9.189354219 | 2.750561049 | 3.79803226  |
| 1641673_at   | CG8378  | 6.799093524 | 7.102183916 | 6.589182168 | 10.86735491 | 11.60990082 | 7.112244646 | 9.49395178  |
| 1627874_at   | xmas-1  | 4.617707867 | 4.851215036 | 4.460620846 | 11.85863091 | 10.98330227 | 8.953156036 | 7.916671516 |
| 1628640_at   | CG14627 | 2.777634269 | 2.637354624 | 2.623740555 | 3.437403549 | 8.992080216 | 3.204980964 | 6.263599715 |
| 1639515_at   | CG7367  | 3.228238555 | 3.088531009 | 3.091709565 | 3.177696081 | 7.721399683 | 5.776054223 | 4.999140858 |
| 1626853_a_at | CG14017 | 2.423754204 | 2.260912326 | 2.289753458 | 10.95204337 | 7.752411344 | 3.938554596 | 6.316671404 |
| 1634529_at   | CG3290  | 2.400402865 | 2.851341867 | 2.294043369 | 3.59849838  | 6.771472564 | 5.459596106 | 2.208130849 |
| 1636640_at   | CG14811 | 2.846512689 | 2.759697293 | 2.759697293 | 8.173655474 | 11.34984609 | 6.591836159 | 11.72415543 |
| 1637562_at   | TwdIT   | 2.915902551 | 3.899267869 | 2.832911232 | 3.478432852 | 7.641097486 | 3.685436789 | 3.002425976 |
| 1626452_at   | CG2121  | 2.666772708 | 2.7178643   | 2.58418142  | 2.565875263 | 7.158207003 | 5.833029661 | 5.332705511 |
| 1626613_at   | CG11236 | 3.217273438 | 3.236061193 | 3.136400169 | 3.527999085 | 7.419477091 | 3.894780441 | 3.225640346 |
| 1627153_at   | CG30157 | 3.532789598 | 3.648626472 | 3.457917677 | 10.44229666 | 8.992879916 | 5.887893718 | 7.450941478 |
| 1625957_at   | CG10051 | 2.197396811 | 2.167207326 | 2.130106683 | 2.314856387 | 8.346618743 | 9.085644994 | 4.744162448 |
| 1623334_at   | CG12913 | 2.292435402 | 2.273604993 | 2.225966252 | 2.73404493  | 6.611678182 | 2.351408813 | 2.499582709 |
| 1636344_at   | chp     | 3.302215227 | 3.552650425 | 3.240314267 | 3.195615082 | 7.645556211 | 3.855783972 | 8.777604528 |
| 1633570_at   | CG1688  | 2.853849273 | 2.902881935 | 2.797221121 | 3.965283755 | 8.41074643  | 7.860967382 | 3.238226383 |
| 1626815_a_at | tadr    | 2.183249268 | 2.141796147 | 2.130106683 | 6.426591693 | 7.579369821 | 10.00910131 | 5.494478259 |
| 1640357_at   | CG30161 | 2.204603827 | 2.363928335 | 2.163733361 | 11.19188198 | 9.153051611 | 10.83857946 | 4.431494558 |
| 1633649_s_at | trpl    | 2.546217215 | 2.613798409 | 2.513206155 | 2.854990589 | 7.874706341 | 4.350639691 | 7.711394768 |
| 1638944_at   | CG34435 | 2.356294178 | 2.326031681 | 2.326031681 | 8.406880652 | 7.558203323 | 7.743724569 | 2.326031681 |
| 1624011_at   | Cpr76Bc | 2.620432263 | 2.708171191 | 2.591823014 | 2.915804638 | 8.206785245 | 2.628920522 | 7.586256891 |
| 1631794_at   | CG6201  | 2.831123311 | 3.163732438 | 2.802736367 | 2.777320498 | 9.410104092 | 4.281667636 | 6.836356726 |
| 1638006_at   | CG10211 | 2.564715858 | 2.373357439 | 2.543032385 | 2.528321168 | 6.729960005 | 5.742695437 | 2.618465437 |
| 1634953_at   | CG3795  | 2.840398871 | 2.850666893 | 2.824837999 | 11.37609445 | 8.066344207 | 6.977634086 | 2.849460572 |
| 1629914_at   | CG34281 | 2.142061689 | 2.146046691 | 2.130106683 | 4.556631704 | 6.497595118 | 10.23685158 | 3.668731517 |
| 1634123_at   | CG14304 | 4.559259916 | 4.741855642 | 4.548591913 | 4.384644622 | 9.665564877 | 8.959116374 | 5.186287824 |
| 1630862_at   | CG18432 | 2.138953458 | 2.140297451 | 2.130375676 | 2.74149687  | 6.558927582 | 2.141557817 | 2.246866033 |
| 1625347_at   | CG14829 | 2.139113057 | 2.150340314 | 2.130626083 | 2.357391608 | 8.157413283 | 2.130496233 | 4.345117571 |
| 1641174_at   | RFesP   | 2.130106683 | 2.130106683 | 2.130106683 | 2.130106683 | 9.260496021 | 3.871473467 | 3.708259566 |
| 1638584_at   | CG9988  | 2.130106683 | 2.130106683 | 2.130106683 | 3.046073127 | 8.82211893  | 3.667939357 | 4.443498781 |
| 1627169_at   | CG3264  | 2.130106683 | 2.130106683 | 2.130106683 | 2.130106683 | 8.029409366 | 8.103342531 | 2.181756837 |
| 1624898_a_at | Ark     | 2.40975874  | 2.409861617 | 2.40975874  | 2.829017846 | 7.934649292 | 2.203923431 | 3.568554139 |
| 1634816_at   | CG8401  | 2.130106683 | 2.130106683 | 2.130106683 | 2.130106683 | 7.25402902  | 5.363602962 | 2.708951317 |
| 1623548_at   | CG18269 | 2.130106683 | 2.325415941 | 2.130106683 | 2.130106683 | 6.892719915 | 2.162184617 | 7.081962826 |
| 1632081_s_at | CG32626 | 2.416728891 | 2.416728891 | 2.416728891 | 2.315454394 | 7.158483349 | 2.161873636 | 3.503106848 |
| 1638000_at   | sala    | 2.130106683 | 2.130106683 | 2.130106683 | 2.130106683 | 6.826328988 | 7.140076703 | 4.424792765 |



|              |                       |             |             |             |             |             |             |             |
|--------------|-----------------------|-------------|-------------|-------------|-------------|-------------|-------------|-------------|
| 1628030_at   | CG18808               | 3.413937778 | 3.643723981 | 3.413937778 | 11.76126215 | 7.857427674 | 9.72585115  | 4.815914345 |
| 1634567_at   | ---                   | 2.130106683 | 2.179374017 | 2.130106683 | 2.130106683 | 6.507609757 | 2.130106683 | 2.905210166 |
| 1624662_at   | CG3106                | 2.130106683 | 2.130106683 | 2.130106683 | 2.130106683 | 6.278893392 | 2.130106683 | 4.656126683 |
| 1633651_at   | Tk                    | 2.130106683 | 2.130106683 | 2.130106683 | 2.217458368 | 6.211299071 | 2.262068647 | 2.130106683 |
| 1637782_at   | CG12020               | 3.014333842 | 3.085085563 | 3.014784849 | 12.39498416 | 9.069327564 | 10.55368432 | 3.185124632 |
| 1633662_a_at | CG8290                | 2.947176264 | 2.817775606 | 2.952456974 | 3.758441727 | 7.141736907 | 2.306584794 | 5.226257928 |
| 1634301_at   | CG14017               | 2.141865574 | 2.145675706 | 2.149485839 | 11.28508612 | 8.091672769 | 5.143898168 | 6.457363781 |
| 1637833_at   | Jhe                   | 3.722683324 | 4.038679733 | 3.738848823 | 5.320304627 | 7.78083904  | 2.964477582 | 6.105426293 |
| 1641099_a_at | Hr51                  | 2.147447499 | 2.147447499 | 2.164788315 | 6.806325117 | 7.087061355 | 6.819403175 | 7.747783058 |
| 1624870_at   | CG16853               | 2.168127182 | 2.159920771 | 2.189734858 | 11.4511411  | 9.048164502 | 7.523990271 | 2.168127182 |
| 1632751_at   | CG34460               | 4.77483515  | 4.461465402 | 4.79740399  | 12.19959124 | 11.90122907 | 9.768027087 | 10.06515648 |
| 1641544_at   | hubl /// spaw         | 2.637712268 | 2.637712268 | 2.66137031  | 10.12829367 | 7.010991185 | 3.3820026   | 4.467486418 |
| 1633305_at   | Obp99a                | 9.830757624 | 10.00750358 | 9.854740717 | 14.02113867 | 14.27698533 | 13.93579189 | 13.93197687 |
| 1638948_at   | slam                  | 2.154580877 | 2.17905507  | 2.17905507  | 2.17905507  | 6.160161781 | 7.698475952 | 2.17905507  |
| 1630251_at   | CG9624                | 2.130106683 | 2.212235096 | 2.156813403 | 12.71549555 | 8.619398525 | 10.67586105 | 2.173695681 |
| 1632705_at   | ninaD                 | 3.142868019 | 4.554306435 | 3.175152125 | 7.012626471 | 7.802917343 | 2.365549848 | 3.680369885 |
| 1628485_at   | CG13564               | 2.669484113 | 2.701735222 | 2.725462299 | 11.97451841 | 6.869913308 | 7.200337761 | 2.710611923 |
| 1634486_at   | CG30047               | 3.415756698 | 2.888615761 | 3.471746494 | 2.804247052 | 7.882671898 | 7.744525419 | 7.742110658 |
| 1630399_at   | Cad99C                | 2.347200073 | 2.426802269 | 2.40747974  | 2.420361426 | 8.157543204 | 5.627246026 | 2.444388543 |
| 1635080_at   | CG6059                | 2.950711601 | 2.68626099  | 3.014215222 | 11.7417962  | 7.544489366 | 4.436011202 | 3.128855793 |
| 1633632_at   | CG32944               | 3.056769337 | 3.035950487 | 3.12425942  | 5.38634904  | 8.631420426 | 7.154244    | 5.317925049 |
| 1634229_at   | CG8713                | 3.435573717 | 3.517423861 | 3.517423861 | 6.984199106 | 8.906341935 | 8.806416648 | 6.121356957 |
| 1636392_at   | ---                   | 3.905979494 | 3.905979494 | 3.989295986 | 4.383679374 | 8.235877726 | 5.920031669 | 7.073946963 |
| 1625154_s_at | pot                   | 2.955808454 | 2.497192471 | 3.046930104 | 3.378670226 | 7.131568644 | 4.388886097 | 4.963937535 |
| 1628818_at   | CG17562               | 2.136116728 | 2.148728794 | 2.237382408 | 7.290899718 | 8.35617455  | 8.827253005 | 5.726913325 |
| 1624074_at   | Obp56a                | 2.130106683 | 2.249807185 | 2.249807185 | 4.847264074 | 6.598266573 | 8.444244769 | 6.686730159 |
| 1625208_at   | CG15393 /// Slh       | 4.148730447 | 3.071944219 | 4.288736691 | 3.559827601 | 9.227733515 | 4.397290473 | 5.092897079 |
| 1627570_a_at | CG8765                | 3.180700499 | 3.267161366 | 3.32386577  | 6.769106984 | 8.277826571 | 3.743791496 | 6.101122682 |
| 1630360_a_at | CG8202                | 2.227781546 | 2.214307261 | 2.383924412 | 2.655784758 | 7.098230224 | 2.140113318 | 4.355483597 |
| 1634488_s_at | CG33111 /// eIF4G2    | 5.730157505 | 4.65823058  | 5.918657975 | 5.795062867 | 10.07977136 | 6.861080557 | 7.574800765 |
| 1639641_at   | CG8560 /// DsecCG8560 | 3.555057364 | 3.282304859 | 3.751465353 | 12.24854194 | 9.666260162 | 9.24776102  | 6.525197829 |
| 1640101_at   | CG8152                | 7.450970384 | 7.525395704 | 7.720909425 | 10.22002263 | 12.42770411 | 9.058023279 | 11.35393254 |
| 1633279_s_at | CG33090               | 3.500430116 | 3.576731419 | 3.773442804 | 4.391757723 | 8.086859629 | 3.283807307 | 5.54360102  |
| 1630899_at   | Fer1                  | 3.695230403 | 3.20063996  | 3.973403362 | 4.672601416 | 7.72163779  | 4.210942855 | 6.366507091 |
| 1623377_at   | CG14841               | 3.269747843 | 2.88007426  | 3.552209697 | 10.98688969 | 11.76774128 | 10.74374312 | 8.854320276 |
| 1623360_at   | ---                   | 3.861756903 | 4.097306886 | 4.147447222 | 5.310474191 | 8.587609801 | 3.284213893 | 5.35106207  |

|              |                         |             |             |             |             |             |             |             |
|--------------|-------------------------|-------------|-------------|-------------|-------------|-------------|-------------|-------------|
| 1636525_at   | CG13541                 | 3.021079842 | 3.103689706 | 3.32317342  | 11.68099589 | 7.597986409 | 7.403503048 | 2.882790409 |
| 1632552_at   | rempA                   | 3.394294742 | 4.289083218 | 3.700936638 | 5.427472653 | 7.584372599 | 6.705780457 | 5.690593309 |
| 1626027_at   | Sr-CII                  | 2.480178194 | 2.316508996 | 2.798166968 | 10.20528066 | 8.914158651 | 11.53255373 | 8.15290282  |
| 1630108_a_at | r-cup                   | 3.226310752 | 3.264458454 | 3.560452681 | 10.30080299 | 7.367642298 | 7.100333243 | 3.26212251  |
| 1629448_at   | CG14358                 | 2.267535368 | 2.209572494 | 2.613878601 | 2.553163881 | 8.553539034 | 11.4426473  | 6.631649771 |
| 1631256_at   | Upf2                    | 4.536774496 | 5.761572771 | 4.88316438  | 7.244898942 | 8.756143031 | 4.883432537 | 7.654597831 |
| 1625673_at   | CG12983                 | 2.422216774 | 2.438582592 | 2.769164033 | 7.393396747 | 9.388343065 | 4.266640314 | 3.633110747 |
| 1639822_at   | Tusp                    | 3.89561389  | 2.985334064 | 4.259609969 | 5.954459654 | 9.491468678 | 7.847039144 | 8.890544317 |
| 1639268_at   | CG13324 /// DyakGE13403 | 2.8367798   | 2.54254737  | 3.201354523 | 4.215498983 | 7.253189794 | 5.861062356 | 7.545826358 |
| 1627292_at   | CG2898                  | 3.031814102 | 3.121926395 | 3.413851337 | 11.25448615 | 10.41724687 | 8.082372402 | 5.577868851 |
| 1626358_at   | Fer1                    | 2.380809497 | 2.714398307 | 2.773110922 | 2.714340176 | 7.955872423 | 2.377722234 | 6.264423613 |
| 1634510_at   | CG17324                 | 3.018958714 | 2.537402897 | 3.418814904 | 6.153645312 | 8.11041016  | 5.021343906 | 7.410050458 |
| 1631126_at   | gcm                     | 2.287273061 | 2.229712382 | 2.704040826 | 4.947599358 | 6.669175731 | 8.852076318 | 8.66559281  |
| 1639916_at   | ---                     | 6.935327715 | 7.206406615 | 7.352678489 | 4.924895322 | 11.15307884 | 3.77048608  | 8.998941677 |
| 1640604_at   | CG3309                  | 4.407647403 | 4.668867425 | 4.825717667 | 4.642260264 | 8.863236133 | 4.202683872 | 6.744917894 |
| 1629174_at   | CG42284                 | 2.568915852 | 2.65922364  | 3.031184028 | 2.90894353  | 6.813417216 | 3.475260765 | 4.048597361 |
| 1640155_at   | ---                     | 2.784125402 | 3.161445076 | 3.246609213 | 3.09883619  | 7.083129334 | 2.222053835 | 4.149463607 |
| 1634494_at   | CG17648                 | 2.134741551 | 2.147795697 | 2.605575302 | 11.17700047 | 6.173702801 | 6.842034693 | 6.930141731 |
| 1627077_at   | CG12917                 | 2.271045521 | 2.370775513 | 2.761717382 | 11.11160199 | 9.171147771 | 9.057433444 | 4.770771332 |
| 1633268_s_at | Nha1                    | 4.004847352 | 4.527270872 | 4.518780332 | 4.596269399 | 8.657676897 | 7.338916357 | 8.652865632 |
| 1636719_s_at | CG5316                  | 4.485549046 | 4.522314314 | 5.001764046 | 7.460645781 | 9.245496083 | 3.022328526 | 7.477027847 |
| 1631319_at   | CG32462                 | 3.686396975 | 3.686396975 | 4.218484523 | 11.98611473 | 7.886406701 | 10.51957069 | 3.532132687 |
| 1637587_at   | CG16716                 | 2.188966017 | 2.256814325 | 2.722937883 | 13.20468536 | 7.44899219  | 10.95539752 | 6.004658118 |
| 1626519_at   | CG15526                 | 3.192985967 | 2.805655952 | 3.763654419 | 9.37821561  | 8.183088799 | 9.733833111 | 6.284096745 |
| 1626067_a_at | CG7311                  | 2.583870413 | 2.872012053 | 3.165849714 | 11.42297184 | 8.804019853 | 8.048680595 | 2.372705686 |
| 1629472_s_at | CG9356                  | 7.295912938 | 7.484749854 | 7.900224909 | 9.270257681 | 11.41083902 | 9.159328654 | 9.721835273 |
| 1627707_at   | CG3313                  | 7.357714312 | 7.570121998 | 7.989382639 | 10.60673943 | 11.50630013 | 8.004804945 | 9.479509627 |
| 1623881_s_at | Sirt4                   | 7.328627998 | 7.715133277 | 7.979156212 | 9.451658364 | 11.34525718 | 9.189512584 | 10.30234408 |
| 1626222_at   | Ser8                    | 2.722524904 | 2.81621244  | 3.3772847   | 3.069711873 | 7.270403403 | 7.263800424 | 2.765321633 |
| 1639918_at   | CG15042                 | 2.389848924 | 2.411757336 | 3.070267801 | 7.664414329 | 8.155397447 | 2.431749528 | 5.420010302 |
| 1633713_at   | CG33260 /// Trl         | 3.528136399 | 3.411092891 | 4.210829043 | 8.805285476 | 8.439135755 | 6.498112714 | 3.918948777 |
| 1640988_at   | CG14339 /// DsecGM16790 | 3.121942631 | 3.196753696 | 3.818586827 | 9.927318703 | 8.887266193 | 7.755824286 | 6.026000531 |
| 1630373_at   | CG4935                  | 7.311772605 | 7.541398149 | 8.033295072 | 10.34277647 | 11.44681136 | 7.433030098 | 9.354851924 |
| 1640532_at   | CG30356                 | 2.811538848 | 2.628309306 | 3.534695109 | 12.20367227 | 7.289564171 | 7.322259133 | 5.867953412 |
| 1625777_at   | CG12692                 | 2.822071647 | 2.57638724  | 3.563367944 | 10.14012746 | 11.168733   | 5.93225564  | 4.909204722 |
| 1636082_at   | CG14212                 | 3.112260124 | 3.217893708 | 3.96585569  | 10.63822264 | 9.42306222  | 9.272502443 | 4.612987297 |

|              |         |             |             |             |             |             |             |             |
|--------------|---------|-------------|-------------|-------------|-------------|-------------|-------------|-------------|
| 1640813_at   | CG3156  | 8.022313016 | 8.045715731 | 8.899328253 | 10.10367496 | 12.72187302 | 10.203295   | 10.46763903 |
| 1633421_at   | CG8584  | 3.226113005 | 2.905334601 | 4.108738022 | 12.3535216  | 8.2899841   | 12.04653271 | 9.738800914 |
| 1635237_at   | Ing3    | 6.736555721 | 6.990081092 | 7.638025768 | 10.2011179  | 10.73952914 | 8.366761124 | 8.857713216 |
| 1632816_at   | Es2     | 7.455573801 | 7.962235702 | 8.39322086  | 10.45517732 | 11.90477119 | 10.01137114 | 10.26912054 |
| 1637728_at   | CG8508  | 2.558950149 | 2.78196086  | 3.508859401 | 13.320829   | 7.861377809 | 10.38234217 | 7.918722682 |
| 1640883_a_at | CG2082  | 3.22124526  | 3.054499412 | 4.192088917 | 10.72919721 | 7.72619745  | 7.908645288 | 3.7255421   |
| 1634854_at   | CG16989 | 5.058841081 | 5.511791908 | 6.031094326 | 6.795199333 | 9.714960319 | 6.652769246 | 7.858176015 |
| 1625054_at   | CG1407  | 2.284378356 | 2.321181648 | 3.267308775 | 3.763193996 | 9.302208043 | 2.487540747 | 5.878377756 |
